# Supplementary material for: Genetic diversity of infertile males in India
Source: Research Square preprint supplement (doi:10.21203/rs.3.rs-7849365/v1), 2025-10-31
Supplement: Supplementary file 1 [file 09809d3c01a8c37d399ac052.xlsx]

## Sheet: Sheet1
Supplementary Table 5: List of single molecule molecular inversion probes targeting 39 genes
Gene_Probe ID	>mip_key	logistic_score	chr	ext_probe_start	ext_probe_stop	ext_probe_sequence	ext_probe_copy	lig_probe_start	lig_probe_stop	lig_probe_sequence	lig_probe_copy	mip_scan_start_position	mip_scan_stop_position	scan_target_sequence	mip_sequence	feature_start_position	feature_stop_position	probe_strand	failure_flags	Final concentration
INF1_smMIP_SYCP3_1	12:102122666-102122817/16,24/+	0.083135	12	102122666	102122681	TCATATTACTTAGGTT	4	102122794	102122817	ATTTTTATTTAAGTGTTATACCTA	1	102122682	102122793	CAAGTTCTTTCTTCAAAGAGTCATCAGAATAACATGGATTGAAGAGACTTCCGAACACTTGCTATCTCTTGCTGCTGCTGTTTCATGGAAGGAGATATTAAACATTTGTTTA	ATTTTTATTTAAGTGTTATACCTACTTCAGCTTCCCGATATCCGACGGTAGTGTNNNNNTCATATTACTTAGGTT	102122683	102122778	+	0	20
INF1_smMIP_SYCP3_2	12:102122670-102122821/16,24/-	0.669306	12	102122806	102122821	GAAATAGGTATAACAC	2	102122670	102122693	AGAAAGAACTTGAACCTAAGTAAT	1	102122694	102122805	TTAAATAAAAATTAAACAAATGTTTAATATCTCCTTCCATGAAACAGCAGCAGCAAGAGATAGCAAGTGTTCGGAAGTCTCTTCAATCCATGTTATTCTGATGACTCTTTGA	AGAAAGAACTTGAACCTAAGTAATCTTCAGCTTCCCGATATCCGACGGTAGTGTNNNNNGAAATAGGTATAACAC	102122683	102122778	-	0	1
INF1_smMIP_SYCP3_3	12:102122751-102122902/21,19/-	0.517399	12	102122882	102122902	AATTATGATGGAAACTGTAAG	1	102122751	102122769	CCATGAAACAGCAGCAGCA	1	102122770	102122881	TGATCATATTGAAATTGAAAAAATAAGGATTAATATAAGCAATGAAATATTTTATTTGCTGAAATAGGTATAACACTTAAATAAAAATTAAACAAATGTTTAATATCTCCTT	CCATGAAACAGCAGCAGCACTTCAGCTTCCCGATATCCGACGGTAGTGTNNNNNAATTATGATGGAAACTGTAAG	102122865	102123011	-	0	1
INF1_smMIP_SYCP3_4	12:102122841-102122992/22,18/-	0.314143	12	102122971	102122992	GAGTATGGAAGAGTTGGAGAAG	1	102122841	102122858	TAAGGATTAATATAAGCA	2	102122859	102122970	AATCATGATAATCTACTTACTGGTGCACAAAATGAATTTAAAAAAGAAATGGCTATGTTGCAAAAAAAAATTATGATGGAAACTGTAAGTGATCATATTGAAATTGAAAAAA	TAAGGATTAATATAAGCACTTCAGCTTCCCGATATCCGACGGTAGTGTNNNNNGAGTATGGAAGAGTTGGAGAAG	102122865	102123011	-	0	20
INF1_smMIP_SYCP3_5	12:102122877-102123028/16,24/+	0.558214	12	102122877	102122892	GATCACTTACAGTTTC	1	102123005	102123028	AGACAAGTTAAGTTACAAAGGACC	1	102122893	102123004	CATCATAATTTTTTTTTGCAACATAGCCATTTCTTTTTTAAATTCATTTTGTGCACCAGTAAGTAGATTATCATGATTCTTCTCCAACTCTTCCATACTCTAAAAACACAAA	AGACAAGTTAAGTTACAAAGGACCCTTCAGCTTCCCGATATCCGACGGTAGTGTNNNNNGATCACTTACAGTTTC	102122865	102123011	+	0	1
INF1_smMIP_SYCP3_6	12:102122906-102123057/17,23/+	0.689827	12	102122906	102122922	TTTTGCAACATAGCCAT	2	102123035	102123057	CATCTCAGGTTCTAAACTTGTAC	1	102122923	102123034	TTCTTTTTTAAATTCATTTTGTGCACCAGTAAGTAGATTATCATGATTCTTCTCCAACTCTTCCATACTCTAAAAACACAAAAGACAAGTTAAGTTACAAAGGACCACTTTT	CATCTCAGGTTCTAAACTTGTACCTTCAGCTTCCCGATATCCGACGGTAGTGTNNNNNTTTTGCAACATAGCCAT	102122865	102123011	+	0	1
INF1_smMIP_SYCP3_7	12:102125256-102125407/18,22/-	0.729841	12	102125390	102125407	CTAGAATTGTTCAGAGCC	1	102125256	102125277	TCTTTCTAAGTTTATGGGAAAA	1	102125278	102125389	AGAGATTGAAAACAATTAAACAGTTATATGAGCAGTTCATAAAGGTTTGTTGTATGTGGTAACACAATACATCGTTATAAAACATAATATATTTATGGAAGTAGAAGATAAT	TCTTTCTAAGTTTATGGGAAAACTTCAGCTTCCCGATATCCGACGGTAGTGTNNNNNCTAGAATTGTTCAGAGCC	102125324	102125464	-	0	20
INF1_smMIP_SYCP3_8	12:102125335-102125486/19,21/-	0.48341	12	102125468	102125486	CCAAATTGTTATTACACAG	1	102125335	102125355	GTTCATAAAGGTTTGTTGTAT	1	102125356	102125467	TTTTTTTTCTTTTATATTTGTAGAATATGTTTCGACAGCAACAAAAGATTCTTCAACAATCTAGAATTGTTCAGAGCCAGAGATTGAAAACAATTAAACAGTTATATGAGCA	GTTCATAAAGGTTTGTTGTATCTTCAGCTTCCCGATATCCGACGGTAGTGTNNNNNCCAAATTGTTATTACACAG	102125324	102125464	-	0	1
INF1_smMIP_SYCP3_9	12:102127304-102127455/20,20/+	0.913552	12	102127304	102127323	CATTCCTACTTGAGACTTGG	1	102127436	102127455	CTTGGTTAAGCTTCTGCCTG	1	102127324	102127435	TTGATTATAAACCTAATCATGATACCAACAAGTATTTTTTCTTCTTGTTCCTCAGCTTTCTGCATATCTAAATCCCACTGCTGAAACAAAGTCAGAAACTGCTGAGAATATT	CTTGGTTAAGCTTCTGCCTGCTTCAGCTTCCCGATATCCGACGGTAGTGTNNNNNCATTCCTACTTGAGACTTGG	102127331	102127472	+	0	1
INF1_smMIP_SYCP3_10	12:102127314-102127465/21,19/-	0.718169	12	102127445	102127465	TTATGTTTTACAGGCAGAAGC	1	102127314	102127332	TATAATCAACCAAGTCTCA	1	102127333	102127444	TTAACCAAGAATATTCTCAGCAGTTTCTGACTTTGTTTCAGCAGTGGGATTTAGATATGCAGAAAGCTGAGGAACAAGAAGAAAAAATACTTGTTGGTATCATGATTAGGTT	TATAATCAACCAAGTCTCACTTCAGCTTCCCGATATCCGACGGTAGTGTNNNNNTTATGTTTTACAGGCAGAAGC	102127331	102127472	-	0	10
INF1_smMIP_SYCP3_11	12:102127424-102127575/20,20/-	0.80635	12	102127556	102127575	AGAAGACTTAAGCTGCAGGT	1	102127424	102127443	TAACCAAGAATATTCTCAGC	1	102127444	102127555	ATTTCCTTTTCTTATATAGTATAACTGTGTCAACTCAGTTTTGTTTTAAATTCTTTTTATATTGGTATGAAATATGACAATAATTCATCATTATGTTTTACAGGCAGAAGCT	TAACCAAGAATATTCTCAGCCTTCAGCTTCCCGATATCCGACGGTAGTGTNNNNNAGAAGACTTAAGCTGCAGGT	102127331	102127472	-	0	1
INF1_smMIP_SYCP3_12	12:102128610-102128761/17,23/-	0.887662	12	102128745	102128761	TCTCAAAACTAGTAACC	1	102128610	102128632	TATTCTAGGATCGGCACGGTGGC	1	102128633	102128744	AGAAAATTGAACATGTTTGGAAAACACAACAAGATCAAAGGTAAGGTGGTTGCTTTTTTTTTAGAGCCACATTTCTTAGTATTTACTGGTATAAATTACTTATGAAAAATAC	TATTCTAGGATCGGCACGGTGGCCTTCAGCTTCCCGATATCCGACGGTAGTGTNNNNNTCTCAAAACTAGTAACC	102128683	102128842	-	0	1
INF1_smMIP_SYCP3_13	12:102128729-102128880/16,24/+	0.257754	12	102128729	102128744	ACATGTTCAATTTTCT	9	102128857	102128880	GTTGAAAAAAGTATTTTGTTCCCA	1	102128745	102128856	GGTTACTAGTTTTGAGAGAAGCCTTGGTATACATTTCTAGTCTCTTTCTCTTGGCAAGAAGAGCCTTGTTAATGTCAACTAGATTGAAAATAAAAATTCATTAAAATTTAAT	GTTGAAAAAAGTATTTTGTTCCCACTTCAGCTTCCCGATATCCGACGGTAGTGTNNNNNACATGTTCAATTTTCT	102128683	102128842	+	0	1
INF1_smMIP_SYCP3_14	12:102128758-102128909/17,23/+	0.896433	12	102128758	102128774	GAGAGAAGCCTTGGTAT	1	102128887	102128909	CAAGTAAATATGGGTAAGGTTGG	1	102128775	102128886	ACATTTCTAGTCTCTTTCTCTTGGCAAGAAGAGCCTTGTTAATGTCAACTAGATTGAAAATAAAAATTCATTAAAATTTAATGTTGAAAAAAGTATTTTGTTCCCACATATT	CAAGTAAATATGGGTAAGGTTGGCTTCAGCTTCCCGATATCCGACGGTAGTGTNNNNNGAGAGAAGCCTTGGTAT	102128683	102128842	+	0	1
INF1_smMIP_SYCP3_15	12:102130708-102130859/21,19/-	0.772614	12	102130839	102130859	TTCTTTCCAGGGGTGAAGTGC	1	102130708	102130726	ACTGTTATTTAATGCCTTG	1	102130727	102130838	AGAATATGCTGGAAGGAGTTGGAGGTAGGTTTTAGGAGATACTTGTATTTAAAGAAAATTGTTTTAAGCCATATAATTTGTATAATAACAAATGTTAATAATGGACTATAAG	ACTGTTATTTAATGCCTTGCTTCAGCTTCCCGATATCCGACGGTAGTGTNNNNNTTCTTTCCAGGGGTGAAGTGC	102130793	102130869	-	0	1
INF1_smMIP_SYCP3_16	12:102130815-102130966/17,23/-	0.839696	12	102130950	102130966	CAAGAAAAGTTGCTAAC	5	102130815	102130837	GAATATGCTGGAAGGAGTTGGAG	1	102130838	102130949	AAATAATATATGTAAAATACTTGGCATCTGGTATTTCTTCCAAAACAAGCATGGTATGTTGTGGATCTTCTAAAGTGTTTAAAATGTAATTTCTTTCCAGGGGTGAAGTGCA	GAATATGCTGGAAGGAGTTGGAGCTTCAGCTTCCCGATATCCGACGGTAGTGTNNNNNCAAGAAAAGTTGCTAAC	102130793	102130869	-	0	1
INF1_smMIP_SYCP3_17	12:102130906-102131057/19,21/-	0.779563	12	102131039	102131057	GAAACGTAGGAAGAAAAGG	2	102130906	102130926	GCATCTGGTATTTCTTCCAAA	1	102130927	102131038	TCTTCTGCAGGAGTAGTTGAAGATATGGGGTAACGTGTTCAAAATAATTTTTGTTTCTTAGATAAAGCACTTCAAGAAAAGTTGCTAACAAATAATATATGTAAAATACTTG	GCATCTGGTATTTCTTCCAAACTTCAGCTTCCCGATATCCGACGGTAGTGTNNNNNGAAACGTAGGAAGAAAAGG	102130988	102131096	-	0	1
INF1_smMIP_SYCP3_18	12:102131015-102131166/16,24/-	0.8206	12	102131151	102131166	TCCCCAAATGAAGATG	5	102131015	102131038	TCTTCTGCAGGAGTAGTTGAAGAT	1	102131039	102131150	TTTCATTAAAATTTACCAAAATAACCTATTCAGTTTCAAAAGCTTTTTTTTTTTTTTTTTAATTGTCAATACAGGGAAGACTGCAGTCATTGAGAAACGTAGGAAGAAAAGG	TCTTCTGCAGGAGTAGTTGAAGATCTTCAGCTTCCCGATATCCGACGGTAGTGTNNNNNTCCCCAAATGAAGATG	102130988	102131096	-	0	1
INF1_smMIP_SYCP3_19	12:102131506-102131657/16,24/+	0.8181	12	102131506	102131521	GTTGTACGATAGTCTC	1	102131634	102131657	AAGTCATAGGCTCTCGTAAACTGA	1	102131522	102131633	AATGGGTTCAAAACAAATGAACTGAAGGACATCACTGCCCAACATGAGATGTACTGCACCTTCAATAACATCTTCCTCTGATCCACTCAGATCTTTCTTATCTTCAGTCTCA	AAGTCATAGGCTCTCGTAAACTGACTTCAGCTTCCCGATATCCGACGGTAGTGTNNNNNGTTGTACGATAGTCTC	102131559	102131733	+	0	1
INF1_smMIP_SYCP3_20	12:102131572-102131723/16,24/+	0.852657	12	102131572	102131587	GTACTGCACCTTCAAT	1	102131700	102131723	CCGGAGGACACCATATTTAGATGC	1	102131588	102131699	AACATCTTCCTCTGATCCACTCAGATCTTTCTTATCTTCAGTCTCAAAGTCATAGGCTCTCGTAAACTGATCTTCCACAGACGGCTTCCCAGATTTCCTGGAATACTTTTTT	CCGGAGGACACCATATTTAGATGCCTTCAGCTTCCCGATATCCGACGGTAGTGTNNNNNGTACTGCACCTTCAAT	102131559	102131733	+	0	1
INF1_smMIP_SYCP3_21	12:102131672-102131823/19,21/-	0.756767	12	102131805	102131823	TTGTTCGATATCTCCTTTG	1	102131672	102131692	TATTCCAGGAAATCTGGGAAG	1	102131693	102131804	ATATTTAAACTTTTACCAGTGTATTAAAATGATGTCTTTGCATTCAGAAGGTTAAAGAAATTTGTTTTTTAAAGTCAGGAAGCATCTAAATATGGTGTCCTCCGGAAAAAAG	TATTCCAGGAAATCTGGGAAGCTTCAGCTTCCCGATATCCGACGGTAGTGTNNNNNTTGTTCGATATCTCCTTTG	102131559	102131733	-	0	20
INF1_smMIP_DPY19L2_1	12:63954236-63954387/16,24/+	0.9168	12	63954236	63954251	GGGTGATTGTTTTTGA	4	63954364	63954387	CAGGACGCTACATAAGGGAGGGTT	2	63954252	63954363	CACACGGCATTGTGCCATAGTAAAATGGGTAGTATCCTTCTCAGTTAACCTTTAATACTCTGTACACACTATTCTGAAATACTGTGGTGAAGTAAGGCCTGGCGTCTTCGAG	CAGGACGCTACATAAGGGAGGGTTCTTCAGCTTCCCGATATCCGACGGTAGTGTNNNNNGGGTGATTGTTTTTGA	63954270	63954462	+	0	1
INF1_smMIP_DPY19L2_2	12:63954263-63954414/19,21/-	0.868753	12	63954396	63954414	GATGTGGAAGACCCTTCCA	4	63954263	63954283	CTACCCATTTTACTATGGCAC	1	63954284	63954395	ATGCAGCTAACCCTCCCTTATGTAGCGTCCTGCTCGAAGACGCCAGGCCTTACTTCACCACAGTATTTCAGAATAGTGTGTACAGAGTATTAAAGGTTAACTGAGAAGGATA	CTACCCATTTTACTATGGCACCTTCAGCTTCCCGATATCCGACGGTAGTGTNNNNNGATGTGGAAGACCCTTCCA	63954270	63954462	-	0	20
INF1_smMIP_DPY19L2_3	12:63954370-63954521/16,24/-	0.885753	12	63954506	63954521	AAATCTAGATGTTATG	2	63954370	63954393	GCAGCTAACCCTCCCTTATGTAGC	3	63954394	63954505	TATCTATTGTCTCTAGACAGCAATACATTTCTAATATGGATATATATGTCTGTCTTTTTTCAGGCCTGGTTGCAGTATGCTTGAAATCTGGGATGTGGAAGACCCTTCCAAT	GCAGCTAACCCTCCCTTATGTAGCCTTCAGCTTCCCGATATCCGACGGTAGTGTNNNNNAAATCTAGATGTTATG	63954270	63954462	-	0	1
INF1_smMIP_DPY19L2_4	12:63962871-63963022/16,24/+	0.763151	12	63962871	63962886	AAACTAAGGTACCAGG	5	63962999	63963022	CTCACTTAGTTCTCACAACACACC	4	63962887	63962998	ATAATATTTTAATAAATTTAAAATAAAAATTCTTAAAGAATCAGGACTACTATAATAAAGTGAAACATTTGTTGCTCAAAAATATACCATATCAGATAGCATAGGGTTAATA	CTCACTTAGTTCTCACAACACACCCTTCAGCTTCCCGATATCCGACGGTAGTGTNNNNNAAACTAAGGTACCAGG	63962982	63963149	+	0	1
INF1_smMIP_DPY19L2_5	12:63962978-63963129/16,24/+	0.715525	12	63962978	63962993	TCAGATAGCATAGGGT	3	63963106	63963129	GAATAAACTATTTTTGTCCGAGCC	2	63962994	63963105	TAATACTCACTTAGTTCTCACAACACACCATGCCTCTTCTAAAACATAATAATTCACATGTAACTCCAACAATTTATCTCTTACTTCTTTGGCAGATTTTCGACTATATGTA	GAATAAACTATTTTTGTCCGAGCCCTTCAGCTTCCCGATATCCGACGGTAGTGTNNNNNTCAGATAGCATAGGGT	63962982	63963149	+	0	1
INF1_smMIP_DPY19L2_6	12:63962981-63963132/21,19/-	0.746779	12	63963112	63963132	AAGGGCTCGGACAAAAATAGT	2	63962981	63962999	GTATTAACCCTATGCTATC	3	63963000	63963111	TTATTCTACATATAGTCGAAAATCTGCCAAAGAAGTAAGAGATAAATTGTTGGAGTTACATGTGAATTATTATGTTTTAGAAGAGGCATGGTGTGTTGTGAGAACTAAGTGA	GTATTAACCCTATGCTATCCTTCAGCTTCCCGATATCCGACGGTAGTGTNNNNNAAGGGCTCGGACAAAAATAGT	63962982	63963149	-	0	1
INF1_smMIP_DPY19L2_7	12:63963088-63963239/20,20/-	0.639094	12	63963220	63963239	CGGTGTTCCATCCAGTGAGT	1	63963088	63963107	TCTACATATAGTCGAAAATC	3	63963108	63963219	ATTGAGATTTCAATTTGCTAGTAAGATTTTTTTAGTCTATTCTATTATCATTTATTTTAAAATCTTTTAAATTATTGTTTAAATTTAAAGGGCTCGGACAAAAATAGTTTAT	TCTACATATAGTCGAAAATCCTTCAGCTTCCCGATATCCGACGGTAGTGTNNNNNCGGTGTTCCATCCAGTGAGT	63962982	63963149	-	0	1
INF1_smMIP_DPY19L2_8	12:63964489-63964640/21,19/+	0.900565	12	63964489	63964509	ATTGGGAGTTGCCAAGTGAGT	1	63964622	63964640	CCTGCAAAGACAGCATCTG	2	63964510	63964621	CTTGAAGAAATACTCATCAGCTGCCAACCTCAAGTCTGCATCTTCGTAATGTGGATGATTCACAATGGGATGAAGTGTAGACAGCTTGATGCTTGCCATTGTAGGCATGGCA	CCTGCAAAGACAGCATCTGCTTCAGCTTCCCGATATCCGACGGTAGTGTNNNNNATTGGGAGTTGCCAAGTGAGT	63964516	63964657	+	0	1
INF1_smMIP_DPY19L2_9	12:63964602-63964753/18,22/+	0.894804	12	63964602	63964619	TTGCCATTGTAGGCATGG	4	63964732	63964753	GATGATGCCTATTTACATGACC	2	63964620	63964731	CACCTGCAAAGACAGCATCTGAAAAAAAAAAAAGGATATATTCTTCAATTAAATGTTTTAAAGAAAATCAGAAGTTAAACTTACCTCTAATATGTGAACCCAAATTAAGAAG	GATGATGCCTATTTACATGACCCTTCAGCTTCCCGATATCCGACGGTAGTGTNNNNNTTGCCATTGTAGGCATGG	63964516	63964657	+	0	1
INF1_smMIP_DPY19L2_10	12:63974319-63974470/16,24/-	0.709174	12	63974455	63974470	ACAGTGGATCAAATAC	4	63974319	63974342	GTGTGTATGACAGATTTACAAATA	1	63974343	63974454	AGTACCACATCAGGTGTGTAGGTATTTGGTTATATGCTAGTTTTATACAAACATACAGACACATTTGTGTATACTATATATAATTATTGTCATTTCTGATATATGTGTGTAT	GTGTGTATGACAGATTTACAAATACTTCAGCTTCCCGATATCCGACGGTAGTGTNNNNNACAGTGGATCAAATAC	63974420	63974636	-	0	1
INF1_smMIP_DPY19L2_11	12:63974417-63974568/20,20/-	0.650233	12	63974549	63974568	GGCATTTTAACAGTGATGTC	1	63974417	63974436	TAGGTATTTGGTTATATGCT	3	63974437	63974548	AATACAAGGTTATGCAAACCTCCGTAATCAATGGAGCATAATAGGAGAATTTAATAATTTGCCTCAGGAAGAACTTTTACAGTGGATCAAATACAGTACCACATCAGGTGTG	TAGGTATTTGGTTATATGCTCTTCAGCTTCCCGATATCCGACGGTAGTGTNNNNNGGCATTTTAACAGTGATGTC	63974420	63974636	-	0	10
INF1_smMIP_DPY19L2_12	12:63974511-63974662/16,24/-	0.885441	12	63974647	63974662	TACTCTTCATATAAGA	7	63974511	63974534	CAAACCTCCGTAATCAATGGAGCA	2	63974535	63974646	ACTAGAAATAAACGGTTTCTTTCGTTTCAGCTCTTTGGCTGGCTTTTTCGCAGAGTTCGTTTTGAGAAGGTTATCTTTGGCATTTTAACAGTGATGTCAATACAAGGTTATG	CAAACCTCCGTAATCAATGGAGCACTTCAGCTTCCCGATATCCGACGGTAGTGTNNNNNTACTCTTCATATAAGA	63974420	63974636	-	0	1
INF1_smMIP_DPY19L2_13	12:63976109-63976260/16,24/-	0.899443	12	63976245	63976260	ATTTTAATTATGAGGC	6	63976109	63976132	TAGTAGTTACTGTGGCTTTGCTGA	1	63976133	63976244	TAAAGATGTTTTTGACACCGCACATGTGTGTTATGGCTTCCTTGATATGCTCTCGACAGGTAAGGGATTCATTCTTGTATAACAATACTATAAAAACTATAGCAGCTATACT	TAGTAGTTACTGTGGCTTTGCTGACTTCAGCTTCCCGATATCCGACGGTAGTGTNNNNNATTTTAATTATGAGGC	63976164	63976325	-	0	1
INF1_smMIP_DPY19L2_14	12:63976181-63976332/19,21/-	0.731104	12	63976314	63976332	TGATTTTGTCTTATTTGTG	3	63976181	63976201	GATATGCTCTCGACAGGTAAG	2	63976202	63976313	TTTTATAGCTGGCTTTTCACACATTGCAGTTGTTAGTGTTTACTGCCCTTGCCATTTTAATTATGAGGCTAAAGATGTTTTTGACACCGCACATGTGTGTTATGGCTTCCTT	GATATGCTCTCGACAGGTAAGCTTCAGCTTCCCGATATCCGACGGTAGTGTNNNNNTGATTTTGTCTTATTTGTG	63976164	63976325	-	0	1
INF1_smMIP_DPY19L2_15	12:63976285-63976436/17,23/-	0.737747	12	63976420	63976436	AATGAATACTGATAGGC	3	63976285	63976307	AGCTGGCTTTTCACACATTGCAG	3	63976308	63976419	TTATTACTAAGTTAGAAGATCCTTGTCTTAATGAATAATATAGTTTTAATATACTTCATTAATTTAAAAATATGAAAAGTAAAAATGTGATTTTGTCTTATTTGTGTTTTAT	AGCTGGCTTTTCACACATTGCAGCTTCAGCTTCCCGATATCCGACGGTAGTGTNNNNNAATGAATACTGATAGGC	63976164	63976325	-	0	1
INF1_smMIP_DPY19L2_16	12:63977547-63977698/16,24/-	0.778603	12	63977683	63977698	ATCAAGCAAATGAAGC	2	63977547	63977570	CTGGTAGACTTGTGTATTAAATTG	1	63977571	63977682	TTATTTTTATGTATTCATAGTATAAAAGACCTTCAGTAAATAGGTAATATTTTTGTTTTATTCTAGAAAACAGCTCCTTGAACACAGTGAGGTAAAGCTTTCATTTTAATCT	CTGGTAGACTTGTGTATTAAATTGCTTCAGCTTCCCGATATCCGACGGTAGTGTNNNNNATCAAGCAAATGAAGC	63977570	63977636	-	0	1
INF1_smMIP_DPY19L2_17	12:63987826-63987977/16,24/+	0.259414	12	63987826	63987841	TGGAATACTGTATGTT	5	63987954	63987977	ACTGCAATATTTAAAATGCTCTGA	4	63987842	63987953	TTAAAAACAATGATGATATAATTACCTTAGATAAATGTTTGTAGCTAAAACATATGAAATATCACGAACAGTCTGTGAATAGAATCAAATCAATGAAACTTTTGTAAGGAAT	ACTGCAATATTTAAAATGCTCTGACTTCAGCTTCCCGATATCCGACGGTAGTGTNNNNNTGGAATACTGTATGTT	63987845	63987933	+	0	1
INF1_smMIP_DPY19L2_18	12:63989641-63989792/21,19/-	0.638917	12	63989772	63989792	TATTGCTTCCAGTTGTTATGG	4	63989641	63989659	AGGATGAACTCTTTCTCTC	1	63989660	63989771	TGATTACATGTTTTATCTTTAAAAAGGTATTTTTAAACAAATTATTATTTGTTTTTGGCATCAATATAAGGACTATAAGAATGCAAATTGCTCAGAATTCCATGTTATTTTT	AGGATGAACTCTTTCTCTCCTTCAGCTTCCCGATATCCGACGGTAGTGTNNNNNTATTGCTTCCAGTTGTTATGG	63989724	63989837	-	0	1
INF1_smMIP_DPY19L2_19	12:63989749-63989900/17,23/-	0.485772	12	63989884	63989900	ATGGCACTTAGTTTGAC	4	63989749	63989771	TGATTACATGTTTTATCTTTAAA	4	63989772	63989883	ATAGGTGTTTACTAATTTAATGTAAAAATTGTAAGTAACCATTTTGAATAATTTGGTATATTTCAGACTCCGCTGAGATACACAAAGACATTATTGCTTCCAGTTGTTATGG	TGATTACATGTTTTATCTTTAAACTTCAGCTTCCCGATATCCGACGGTAGTGTNNNNNATGGCACTTAGTTTGAC	63989724	63989837	-	0	20
INF1_smMIP_DPY19L2_20	12:63991534-63991685/19,21/-	0.901019	12	63991667	63991685	CCTGAGTGATCTTATAGCA	4	63991534	63991554	TGAGTTTTTTGCTCTAGGTTT	1	63991555	63991666	GCCAGAATCTTAAGGTATACAGATTTTGATACTTTAATATATACCTGTGCTCCCGAATTTGACTTCATGGAAAAAGCGGTATGAATGTTTCTTTTTTCCTTCTCTACTAATA	TGAGTTTTTTGCTCTAGGTTTCTTCAGCTTCCCGATATCCGACGGTAGTGTNNNNNCCTGAGTGATCTTATAGCA	63991567	63991710	-	0	1
INF1_smMIP_DPY19L2_21	12:63991595-63991746/17,23/-	0.808025	12	63991730	63991746	CTATAGGCTATAATCAC	2	63991595	63991617	CTCCCGAATTTGACTTCATGGAA	3	63991618	63991729	TTGTGTAATTTTAATTCATTTTACTTTATTTTCTCCCAGATTCGCCTGAGTGATCTTATAGCAGCCAGAATCTTAAGGTATACAGATTTTGATACTTTAATATATACCTGTG	CTCCCGAATTTGACTTCATGGAACTTCAGCTTCCCGATATCCGACGGTAGTGTNNNNNCTATAGGCTATAATCAC	63991567	63991710	-	0	1
INF1_smMIP_DPY19L2_22	12:63994007-63994158/18,22/-	0.768253	12	63994141	63994158	AGGTAGTGCCTGGTGGTG	4	63994007	63994028	CTTTGAAACCATCTATTCTTAT	2	63994029	63994140	TGGAACAATCATTTTGAAATTTCTGACATCTAAAATCTTAGGCGTTTCAGACCACGTAAGTACTTTTTAGTTAAAACATGAAAGTTCTTATAAATATGTAGCTGAATGAAAA	CTTTGAAACCATCTATTCTTATCTTCAGCTTCCCGATATCCGACGGTAGTGTNNNNNAGGTAGTGCCTGGTGGTG	63994064	63994186	-	0	1
INF1_smMIP_DPY19L2_23	12:63994083-63994234/16,24/+	0.77031	12	63994083	63994098	TACGTGGTCTGAAACG	3	63994211	63994234	CCAGCTAAAGTATTCAATTATGTC	1	63994099	63994210	CCTAAGATTTTAGATGTCAGAAATTTCAAAATGATTGTTCCACACCACCAGGCACTACCTTGAATTAGCTAGAAAATAAAATAGAAGTCCAGTATTTAAAACTACAAATCAC	CCAGCTAAAGTATTCAATTATGTCCTTCAGCTTCCCGATATCCGACGGTAGTGTNNNNNTACGTGGTCTGAAACG	63994064	63994186	+	0	1
INF1_smMIP_DPY19L2_24	12:64002318-64002469/16,24/-	0.416051	12	64002454	64002469	TATGTGCATTTTAGGC	6	64002318	64002341	AAACTGAACACAGTTAATATGCTT	3	64002342	64002453	AATAATTCTAAAGAGAAATGAAATTCAAAAACTGGGAGTATCTAAACTCAACTTTTGGGTAAGATTCAATGTTTTTAATGCAGTTTATTTAAATTCTACTTTTTATTTCTAT	AAACTGAACACAGTTAATATGCTTCTTCAGCTTCCCGATATCCGACGGTAGTGTNNNNNTATGTGCATTTTAGGC	64002374	64002475	-	0	1
INF1_smMIP_DPY19L2_25	12:64002408-64002559/18,22/-	0.822097	12	64002542	64002559	GAGATGGAACAGGGTGGC	3	64002408	64002429	TCAAAAACTGGGAGTATCTAAA	3	64002430	64002541	TATATAATTTTTGAAATGTACCATTTATACAAAATATAAATGTTAATTGTATTGAATTGTTTCATTTTCCCTTATGTGCATTTTAGGCAATAATTCTAAAGAGAAATGAAAT	TCAAAAACTGGGAGTATCTAAACTTCAGCTTCCCGATATCCGACGGTAGTGTNNNNNGAGATGGAACAGGGTGGC	64002374	64002475	-	0	1
INF1_smMIP_DPY19L2_26	12:64011035-64011186/16,24/+	0.439281	12	64011035	64011050	TGCTATTTGGCAGGTT	2	64011163	64011186	ACTGAAATCTGAAAAAAATGAAAA	2	64011051	64011162	AAAAAAAACCAACTTTATGAACTAAACACTTACCCACGTCATTAACAAAGATGAAGAATAATAAGAAGATAAGTACATTGAATTTCCAAACATCAAAATGAAACTAAGGGTA	ACTGAAATCTGAAAAAAATGAAAACTTCAGCTTCCCGATATCCGACGGTAGTGTNNNNNTGCTATTTGGCAGGTT	64011062	64011190	+	0	1
INF1_smMIP_DPY19L2_27	12:64011145-64011296/22,18/-	0.521504	12	64011275	64011296	ATTTGGCCAAGAGTCATTCATC	1	64011145	64011162	TACCCTTAGTTTCATTTT	4	64011163	64011274	TTTATGCAAATAAATTTGCATTAGAAATGGCTATATACCTACAAAATATGCATTATGCCAATATATGTAATAACCATAAAATGTATTTTTTTCATTTTTTTCAGATTTCAGT	TACCCTTAGTTTCATTTTCTTCAGCTTCCCGATATCCGACGGTAGTGTNNNNNATTTGGCCAAGAGTCATTCATC	64011062	64011190	-	0	20
INF1_smMIP_DPY19L2_28	12:64011801-64011952/16,24/-	0.0947243	12	64011937	64011952	GAAGATCATTTATATG	5	64011801	64011824	TACATATGGTATTGGTGATATCCA	2	64011825	64011936	AACATGGTAACATTTTTAATATATATAAGTCAAATATTAAGATAGGTTCTCAGAGTTTATAAAATCGAAGTGATTCTGTTTTATACGGTACCTCCTCTTTGGTAATATTTAA	TACATATGGTATTGGTGATATCCACTTCAGCTTCCCGATATCCGACGGTAGTGTNNNNNGAAGATCATTTATATG	64011909	64012028	-	0	20
INF1_smMIP_DPY19L2_29	12:64017739-64017890/18,22/-	0.872419	12	64017873	64017890	CCACCTCTCCGTGAAAGT	3	64017739	64017760	CTTCAATTCAGCACTTTGGGAA	1	64017761	64017872	TTTTCCTATCCTTTCCTTGTACTTCAGATGTGTATTTTAACTTTGATTCTCAGGTAACTTCGATTTATAAAACGAAGGCAAATAAATTATAATTTAAGTTTCTTAAAATATA	CTTCAATTCAGCACTTTGGGAACTTCAGCTTCCCGATATCCGACGGTAGTGTNNNNNCCACCTCTCCGTGAAAGT	64017798	64017931	-	0	1
INF1_smMIP_DPY19L2_30	12:64017840-64017991/17,23/+	0.908743	12	64017840	64017856	ACACATCTGAAGTACAA	1	64017969	64017991	AACCAGGGGTGAGTTTGTTTTAG	2	64017857	64017968	GGAAAGGATAGGAAAAACTTTCACGGAGAGGTGGTGTCCACATCACACGGGTGGCCTGAAATCAACAAAATGCCCACTTTACATCCTATTTACTACAACAAACATATTAAAA	AACCAGGGGTGAGTTTGTTTTAGCTTCAGCTTCCCGATATCCGACGGTAGTGTNNNNNACACATCTGAAGTACAA	64017798	64017931	+	0	1
INF1_smMIP_DPY19L2_31	12:64020195-64020346/18,22/-	0.673083	12	64020329	64020346	TTTGATTGTATTCTCTGT	2	64020195	64020216	AGAAGAGGCTGTAGAGGAACAA	3	64020217	64020328	TTTTTTTGTTTTTTTTTTACAGTGGGACTCAACTGGGAGGTCTTATTACAGTACTGTGCTTCTTTTTCAACCATGGAGAGGTTTGTTTTCTAGAAAGCAATTTTTAAGAAAT	AGAAGAGGCTGTAGAGGAACAACTTCAGCTTCCCGATATCCGACGGTAGTGTNNNNNTTTGATTGTATTCTCTGT	64020227	64020326	-	0	1
INF1_smMIP_DPY19L2_32	12:64038123-64038274/16,24/-	0.864361	12	64038259	64038274	TTGGGAGATCCTGCTT	9	64038123	64038146	GCTTTTACAGACTGGCTGATATTT	2	64038147	64038258	GCTTTTATGTTGGTGTAATCTTTATTTTAAATGGACTAATGATGGGATTGTTCTTCATGTATGGAGCATACCTGAGGTAAGACTACTACTGAATTAAGAGACCTTTCAGTGG	GCTTTTACAGACTGGCTGATATTTCTTCAGCTTCCCGATATCCGACGGTAGTGTNNNNNTTGGGAGATCCTGCTT	64038161	64038296	-	0	1
INF1_smMIP_DPY19L2_33	12:64038253-64038404/16,24/+	0.772778	12	64038253	64038268	AAAAGCAAGCAGGATC	8	64038381	64038404	AAAGCATTTGCTTTCCAGATTGCT	2	64038269	64038380	TCCCAATCCTTTGAAAAGATACAGATAATCAGTGTTTAATGAATATATGACTCTAAGGCAATTGGGCATAATTATCTCAGTGCTTTGCAATCAAGAGCTCATGAATTTGCTG	AAAGCATTTGCTTTCCAGATTGCTCTTCAGCTTCCCGATATCCGACGGTAGTGTNNNNNAAAAGCAAGCAGGATC	64038161	64038296	+	0	1
INF1_smMIP_DPY19L2_34	12:64040982-64041133/18,22/-	0.756908	12	64041116	64041133	TCCTGGTATTGCACATTC	2	64040982	64041003	TGTCATTTGTAAACATTCATAA	5	64041004	64041115	ATGGGAATAATGAATTTATTTGGACTAGAAACTAAGACCTGCTGGAATGTCACCAGAATAGAACCTCTTAATGAAGTTCAAAGCTGTGAAGGCATGTTTCTTCCAAAAATGC	TGTCATTTGTAAACATTCATAACTTCAGCTTCCCGATATCCGACGGTAGTGTNNNNNTCCTGGTATTGCACATTC	64041003	64041165	-	0	1
INF1_smMIP_DPY19L2_35	12:64041043-64041194/17,23/-	0.665567	12	64041178	64041194	AAGAGAATGTATTTACC	3	64041043	64041065	CACCAGAATAGAACCTCTTAATG	5	64041066	64041177	TCAATTATCTCTTTGTTTTTATCTTTTTTAAGGTAATCATAGCCTCCTGGTATTGCACATTCATGGGAATAATGAATTTATTTGGACTAGAAACTAAGACCTGCTGGAATGT	CACCAGAATAGAACCTCTTAATGCTTCAGCTTCCCGATATCCGACGGTAGTGTNNNNNAAGAGAATGTATTTACC	64041003	64041165	-	0	1
INF1_smMIP_DPY19L2_36	12:64055031-64055182/18,22/-	0.764181	12	64055165	64055182	GGCTTACTGAATATCCTC	4	64055031	64055052	TCTTGTTAAGAAAGGGAGGGGA	3	64055053	64055164	TTATAATTAATGCAATAAAACGCTTCCATCTTTATCCAGAGGTGAGTCATAATTTGAGACAAATAATATTTGTAGAGTGATCCTCTTTGTCAGATAAAAATAGTAAGCACAA	TCTTGTTAAGAAAGGGAGGGGACTTCAGCTTCCCGATATCCGACGGTAGTGTNNNNNGGCTTACTGAATATCCTC	64055102	64055281	-	0	1
INF1_smMIP_DPY19L2_37	12:64055105-64055256/16,24/-	0.561651	12	64055241	64055256	TTATTATTCATACTTC	6	64055105	64055128	CAGAGGTGAGTCATAATTTGAGAC	5	64055129	64055240	AAGACCATTATTGAAGCACCTTCGTTTTTGGAAGGACTGTGGATGATTATGAATGACAGGCTTACTGAATATCCTCTTATAATTAATGCAATAAAACGCTTCCATCTTTATC	CAGAGGTGAGTCATAATTTGAGACCTTCAGCTTCCCGATATCCGACGGTAGTGTNNNNNTTATTATTCATACTTC	64055102	64055281	-	0	1
INF1_smMIP_DPY19L2_38	12:64055188-64055339/16,24/-	0.487504	12	64055324	64055339	AAGTTCTAAAGAAGTG	4	64055188	64055211	GGAAGGACTGTGGATGATTATGAA	3	64055212	64055323	ATAAAAATAAATATTTTAAAGTTTTAATTACATTGACAATATATGTCTTTTTTTAAAAAAAGGGACTTTATTATTCATACTTCAAGACCATTATTGAAGCACCTTCGTTTTT	GGAAGGACTGTGGATGATTATGAACTTCAGCTTCCCGATATCCGACGGTAGTGTNNNNNAAGTTCTAAAGAAGTG	64055102	64055281	-	0	1
INF1_smMIP_DPY19L2_39	12:64057457-64057608/16,24/-	0.69418	12	64057593	64057608	TTTTTGAAAATGATCG	4	64057457	64057480	GTAGAAATGTATTAGGAATTGAAA	4	64057481	64057592	TCATTTCTCTCACCTCTCATCTTTGGAACGGGAGATGACTTTTCGCACTGAAATGGTTAGGTTTCTTCTTCTAATGAATTAATTTGTGGTTTAAGAATAGCGAGACTATGAG	GTAGAAATGTATTAGGAATTGAAACTTCAGCTTCCCGATATCCGACGGTAGTGTNNNNNTTTTTGAAAATGATCG	64057516	64057645	-	0	10
INF1_smMIP_DPY19L2_40	12:64057541-64057692/16,24/-	0.749273	12	64057677	64057692	ATTGCTTATTTTACTG	12	64057541	64057564	CGGGAGATGACTTTTCGCACTGAA	1	64057565	64057676	TTAGTTTTGAAACTCGTTCTTATTGTAATATGATACTTCATTTTTTTCTAGGTTACATTTAGTAACACTTTTTGAAAATGATCGTCATTTCTCTCACCTCTCATCTTTGGAA	CGGGAGATGACTTTTCGCACTGAACTTCAGCTTCCCGATATCCGACGGTAGTGTNNNNNATTGCTTATTTTACTG	64057516	64057645	-	0	1
INF1_smMIP_DPY19L2_41	12:64059496-64059647/21,19/-	0.86186	12	64059627	64059647	TATTCCAGCTGTCTTTGTGGC	1	64059496	64059514	AGAACATCTTTATGTGCAC	5	64059515	64059626	AATTTTACATTGGTAAGATTTAGTTTCAGTTTGAAATATTTAAAAACATTTGAATTAAAAATTGCCATCACTCTTTGCATACAGTAAAACAATAACTTCTGGCTATATTTGT	AGAACATCTTTATGTGCACCTTCAGCTTCCCGATATCCGACGGTAGTGTNNNNNTATTCCAGCTGTCTTTGTGGC	64059593	64059659	-	0	1
INF1_smMIP_DPY19L2_42	12:64059602-64059753/16,24/-	0.719903	12	64059738	64059753	TGCTTTGTGTGCTATC	6	64059602	64059625	ATTTTACATTGGTAAGATTTAGTT	3	64059626	64059737	TTTCTAGACATGTAAAATAATACATTTGAAATACTTGTTTTAATGGTATTTTATAATAAAGCAGCTATTAATGACTTTCCTTTTTTTCTTTATTCCAGCTGTCTTTGTGGCA	ATTTTACATTGGTAAGATTTAGTTCTTCAGCTTCCCGATATCCGACGGTAGTGTNNNNNTGCTTTGTGTGCTATC	64059593	64059659	-	0	1
INF1_smMIP_DPY19L2_43	12:64061709-64061860/20,20/-	0.811255	12	64061841	64061860	CCAGCAGAACCACTCTCGGC	1	64061709	64061728	AATAGCAAGGTCCGAGTAGA	3	64061729	64061840	ATCGGTGAGGAGAGGGCAGGAGAGCCCTAGGAGGGAGCCGCATGGCGCTTTTCTTGAGTCTTGAAGGAGATCAGTTTAACAAGCAAGGGTTTGTGGGTGCCTAGTAGGAAAT	AATAGCAAGGTCCGAGTAGACTTCAGCTTCCCGATATCCGACGGTAGTGTNNNNNCCAGCAGAACCACTCTCGGC	64061815	64062193	-	0	1
INF1_smMIP_DPY19L2_44	12:64061817-64061968/18,22/+	0.911579	12	64061817	64061834	CTCTCCTGCCCTCTCCTC	9	64061947	64061968	GTCTTGGCCACCACCTCTAGCT	1	64061835	64061946	ACCGATGCCGAGAGTGGTTCTGCTGGAGAACCGCCGCGCCTGCAGTTCCTGCACCTTTTCCCGGAGCTGCGCCAGGGAATTACGGACGAACTGGAAGGGGCCGAGAAGAAAG	GTCTTGGCCACCACCTCTAGCTCTTCAGCTTCCCGATATCCGACGGTAGTGTNNNNNCTCTCCTGCCCTCTCCTC	64061815	64062193	+	0	1
INF1_smMIP_DPY19L2_45	12:64061894-64062045/22,18/-	0.805545	12	64062024	64062045	CGGCGGGAAACTGCCAAGGGGC	1	64061894	64061911	CCCTGGCGCAGCTCCGGG	4	64061912	64062023	TCCTGGAGGTCCTCCCCGGGGAGGATCCAAAGTCTGAAAGAGCGAAAAGGCTTGGAGCTAGAGGTGGTGGCCAAGACCTTTCTTCTCGGCCCCTTCCAGTTCGTCCGTAATT	CCCTGGCGCAGCTCCGGGCTTCAGCTTCCCGATATCCGACGGTAGTGTNNNNNCGGCGGGAAACTGCCAAGGGGC	64061815	64062193	-	0	1
INF1_smMIP_DPY19L2_46	12:64061970-64062121/21,19/-	0.435056	12	64062101	64062121	AGTCTAAGGGGCGGCGCGGGG	1	64061970	64061988	GAAAGAGCGAAAAGGCTTG	1	64061989	64062100	CCTCCCTCGCCCGGGAGCCGGAGGTAGAGGAGGAGATGGAAAAGTCGGCCCTAGGCGGCGGGAAACTGCCAAGGGGCTCCTGGAGGTCCTCCCCGGGGAGGATCCAAAGTCT	GAAAGAGCGAAAAGGCTTGCTTCAGCTTCCCGATATCCGACGGTAGTGTNNNNNAGTCTAAGGGGCGGCGCGGGG	64061815	64062193	-	0	1
INF1_smMIP_DPY19L2_47	12:64062067-64062218/19,21/-	0.822471	12	64062200	64062218	TGGGCTGTGCCTGAAATTG	5	64062067	64062087	GGAGCCGGAGGTAGAGGAGGA	1	64062088	64062199	ACCCAGCTCCACCATACTCCTTGATTATGAGAAAACAAGGAGTAAGCTCAAAGCGGCTGCAATCTTCCGGCCGCAGCCAGTCTAAGGGGCGGCGCGGGGCCTCCCTCGCCCG	GGAGCCGGAGGTAGAGGAGGACTTCAGCTTCCCGATATCCGACGGTAGTGTNNNNNTGGGCTGTGCCTGAAATTG	64061815	64062193	-	0	1
INF1_smMIP_CATSPER2_1	15:43922760-43922911/22,18/+	0.512417	15	43922760	43922781	TGGCCTAGACACTTATACTTTT	1	43922894	43922911	TTGCTTTACTTGTCTTCC	2	43922782	43922893	TAATTTTAATGAACAGACATTGTTCTATCTGAATGTTTATATTTTCAATTCTCTATTTCCAACAATTCCCTTCATTATCTTTTGCTGGGCCCAAGGATATTGAAGCCATCCA	TTGCTTTACTTGTCTTCCCTTCAGCTTCCCGATATCCGACGGTAGTGTNNNNNTGGCCTAGACACTTATACTTTT	43922877	43922950	+	0	10
INF1_smMIP_CATSPER2_2b	15:43922876-43923027/16,24/+	0.957887	15	43922876	43922891	GGATATTGAAGCCATC	4	43923004	43923027	GCTTTTCTGGGTTCCAGGTTCCCT	1	43922892	43923003	CATTGCTTTACTTGTCTTCCAAGTTCATCAGTGCCTGCACTGCAAAGGAAACAGATTGTGAGGCTGGAGAGCTAAGAATATTCTACATATATAAATGTTTGGTGAAGACCTT	GCTTTTCTGGGTTCCAGGTTCCCTCTTCAGCTTCCCGATATCCGACGGTAGTGTNNNNNGGATATTGAAGCCATC	43922877	43922950	+	0	1
INF1_smMIP_CATSPER2_2	15:43922876-43923027/16,24/+	0.957887	15	43922876	43922891	GGATATTGAAGCCATC	4	43923004	43923027	GCTTTTCTGGGTTCTAGGTTCCCT	1	43922892	43923003	CATTGCTTTACTTGTCTTCCAAGTTCATCAGTGCCTGCACTGCAAAGGAAACAGATTGTGAGGCTGGAGAGCTAAGAATATTCTACATATATAAATGTTTGGTGAAGACCTT	GCTTTTCTGGGTTCTAGGTTCCCTCTTCAGCTTCCCGATATCCGACGGTAGTGTNNNNNGGATATTGAAGCCATC	43922877	43922950	+	0	1
INF1_smMIP_CATSPER2_3	15:43922888-43923039/21,19/-	0.890154	15	43923019	43923039	TAAAGACTTGTGAGGGAACCT	1	43922888	43922906	ACAAGTAAAGCAATGGATG	2	43922907	43923018	AGAACCCAGAAAAGCAAGGTCTTCACCAAACATTTATATATGTAGAATATTCTTAGCTCTCCAGCCTCACAATCTGTTTCCTTTGCAGTGCAGGCACTGATGAACTTGGAAG	ACAAGTAAAGCAATGGATGCTTCAGCTTCCCGATATCCGACGGTAGTGTNNNNNTAAAGACTTGTGAGGGAACCT	43922877	43922950	-	0	1
INF1_smMIP_CATSPER2_4	15:43924315-43924466/16,24/-	0.897391	15	43924451	43924466	CGATATTTTGAGTTGC	2	43924315	43924338	TGGAGAAGGAGGAGGGTGTCCACT	2	43924339	43924450	TAGAAAAGCTTCAGTATAACCTAGAGGAACGTAAGAAGTTACAAGAGTTTGCAGGTATGGAGTTAGGGCAGTCATGGGGACCATGGGAATATATATATAGCGTTTATAGCTG	TGGAGAAGGAGGAGGGTGTCCACTCTTCAGCTTCCCGATATCCGACGGTAGTGTNNNNNCGATATTTTGAGTTGC	43924375	43924581	-	0	1
INF1_smMIP_CATSPER2_5	15:43924413-43924564/22,18/+	0.918793	15	43924413	43924434	CTTCTTACGTTCCTCTAGGTTA	1	43924547	43924564	CCCAGTCCAAACGACCTG	1	43924435	43924546	TACTGAAGCTTTTCTAGCAACTCAAAATATCGGAAGAGTGAGTCTCTGGGCCAAACACGGTCATCCTGATCCATTTCCATTAGCCCGGGCAGATTTTCGTGCACAAGAGTCT	CCCAGTCCAAACGACCTGCTTCAGCTTCCCGATATCCGACGGTAGTGTNNNNNCTTCTTACGTTCCTCTAGGTTA	43924375	43924581	+	0	1
INF1_smMIP_CATSPER2_6	15:43924487-43924638/17,23/+	0.913407	15	43924487	43924503	AAACACGGTCATCCTGA	2	43924616	43924638	GAGCTGGTAAATCCTATGGTGTG	2	43924504	43924615	TCCATTTCCATTAGCCCGGGCAGATTTTCGTGCACAAGAGTCTCCCAGTCCAAACGACCTGCAGGGAGGAATGCTTCAGAAAAGCACGTCTAGATTTGTAAAAGTTGGGTAA	GAGCTGGTAAATCCTATGGTGTGCTTCAGCTTCCCGATATCCGACGGTAGTGTNNNNNAAACACGGTCATCCTGA	43924375	43924581	+	0	1
INF1_smMIP_CATSPER2_7	15:43924767-43924918/19,21/-	0.855024	15	43924900	43924918	ATTGGTGAGCCGAAGAACT	2	43924767	43924787	TTTTTGCTTCTTAATTTCCCC	2	43924788	43924899	ATAATAATGAGTTTTTTCCATTTGAATTCAGACTCCTCTTTAAGACATCTTAGTCTTAACAGGAGCTCTCCTAGTATATCTCCTTTCCAATTTTCTGGTCTTAATTACTTTG	TTTTTGCTTCTTAATTTCCCCCTTCAGCTTCCCGATATCCGACGGTAGTGTNNNNNATTGGTGAGCCGAAGAACT	43924793	43925252	-	0	1
INF1_smMIP_CATSPER2_8	15:43924769-43924920/19,21/+	0.855024	15	43924769	43924787	GGAAATTAAGAAGCAAAAA	2	43924900	43924920	AGTTCTTCGGCTCACCAATAG	2	43924788	43924899	CAAAGTAATTAAGACCAGAAAATTGGAAAGGAGATATACTAGGAGAGCTCCTGTTAAGACTAAGATGTCTTAAAGAGGAGTCTGAATTCAAATGGAAAAAACTCATTATTAT	AGTTCTTCGGCTCACCAATAGCTTCAGCTTCCCGATATCCGACGGTAGTGTNNNNNGGAAATTAAGAAGCAAAAA	43924793	43925252	+	0	1
INF1_smMIP_CATSPER2_9	15:43924862-43925013/16,24/+	0.911867	15	43924862	43924877	GAGGAGTCTGAATTCA	4	43924990	43925013	GGTACTCTCTCTTTTTTGACAAGG	1	43924878	43924989	AATGGAAAAAACTCATTATTATAGTTCTTCGGCTCACCAATAGATTCAGAAAATCTGGATTCAGAAGAGGAAGAATAGGAAGAGGATGTGGAGGAGACACAGGAGGAAGACT	GGTACTCTCTCTTTTTTGACAAGGCTTCAGCTTCCCGATATCCGACGGTAGTGTNNNNNGAGGAGTCTGAATTCA	43924893	43925152	+	0	1
INF1_smMIP_CATSPER2_10	15:43924869-43925020/17,23/+	0.776938	15	43924869	43924885	CTGAATTCAAATGGAAA	4	43924998	43925020	CTCTTTTTTGACAAGGTCTCTTC	2	43924886	43924997	AAACTCATTATTATAGTTCTTCGGCTCACCAATAGATTCAGAAAATCTGGATTCAGAAGAGGAAGAATAGGAAGAGGATGTGGAGGAGACACAGGAGGAAGACTGGTACTCT	CTCTTTTTTGACAAGGTCTCTTCCTTCAGCTTCCCGATATCCGACGGTAGTGTNNNNNCTGAATTCAAATGGAAA	43924793	43925252	+	0	1
INF1_smMIP_CATSPER2_11	15:43924870-43925021/17,23/-	0.740939	15	43925005	43925021	AGAAGAGACCTTGTCAA	2	43924870	43924892	TGAGTTTTTTCCATTTGAATTCA	2	43924893	43925004	AAAAGAGAGAGTACCAGTCTTCCTCCTGTGTCTCCTCCACATCCTCTTCCTATTCTTCCTCTTCTGAATCCAGATTTTCTGAATCTATTGGTGAGCCGAAGAACTATAATAA	TGAGTTTTTTCCATTTGAATTCACTTCAGCTTCCCGATATCCGACGGTAGTGTNNNNNAGAAGAGACCTTGTCAA	43924793	43925252	-	0	1
INF1_smMIP_CATSPER2_12	15:43924963-43925114/19,21/-	0.900398	15	43925096	43925114	ACAAAGGGAAAGTTTGGAC	2	43924963	43924983	CCTCCTGTGTCTCCTCCACAT	1	43924984	43925095	TTATCAGAAGTGTCTGAAGTAGAGTCTAATTATGGTGCCACTGAAGAGGATTTAATAACATCTGCATCAAAAACAGAAGAGACCTTGTCAAAAAAGAGAGAGTACCAGTCTT	CCTCCTGTGTCTCCTCCACATCTTCAGCTTCCCGATATCCGACGGTAGTGTNNNNNACAAAGGGAAAGTTTGGAC	43924893	43925152	-	0	1
INF1_smMIP_CATSPER2_13	15:43924979-43925130/19,21/+	0.771985	15	43924979	43924997	GGAGGAAGACTGGTACTCT	2	43925110	43925130	TTTGTTGACTAGCTCCTCTTG	2	43924998	43925109	CTCTTTTTTGACAAGGTCTCTTCTGTTTTTGATGCAGATGTTATTAAATCCTCTTCAGTGGCACCATAATTAGACTCTACTTCAGACACTTCTGATAAGTCCAAACTTTCCC	TTTGTTGACTAGCTCCTCTTGCTTCAGCTTCCCGATATCCGACGGTAGTGTNNNNNGGAGGAAGACTGGTACTCT	43924793	43925252	+	0	1
INF1_smMIP_CATSPER2_14	15:43924982-43925133/17,23/-	0.818134	15	43925117	43925133	GTTCAAGAGGAGCTAGT	2	43924982	43925004	AAAAGAGAGAGTACCAGTCTTCC	1	43925005	43925116	CAACAAAGGGAAAGTTTGGACTTATCAGAAGTGTCTGAAGTAGAGTCTAATTATGGTGCCACTGAAGAGGATTTAATAACATCTGCATCAAAAACAGAAGAGACCTTGTCAA	AAAAGAGAGAGTACCAGTCTTCCCTTCAGCTTCCCGATATCCGACGGTAGTGTNNNNNGTTCAAGAGGAGCTAGT	43924793	43925252	-	0	1
INF1_smMIP_CATSPER2_15	15:43924993-43925144/16,24/-	0.264822	15	43925129	43925144	TTCTTCTTTAAGTTCA	12	43924993	43925016	AGACCTTGTCAAAAAAGAGAGAGT	1	43925017	43925128	AGAGGAGCTAGTCAACAAAGGGAAAGTTTGGACTTATCAGAAGTGTCTGAAGTAGAGTCTAATTATGGTGCCACTGAAGAGGATTTAATAACATCTGCATCAAAAACAGAAG	AGACCTTGTCAAAAAAGAGAGAGTCTTCAGCTTCCCGATATCCGACGGTAGTGTNNNNNTTCTTCTTTAAGTTCA	43924893	43925152	-	10	1
INF1_smMIP_CATSPER2_16	15:43925093-43925244/16,24/-	0.872037	15	43925229	43925244	CCTCATTGTCTTATGC	4	43925093	43925116	CAACAAAGGGAAAGTTTGGACTTA	2	43925117	43925228	CCCAGCTTTAGGGGGTGGCCAGGGGCAGAACCAGAATAATGAGTGGACTAGTCATATCTTGTAAATGTTTGTGAAGCCATAAATTTCTTCTTTAAGTTCAAGAGGAGCTAGT	CAACAAAGGGAAAGTTTGGACTTACTTCAGCTTCCCGATATCCGACGGTAGTGTNNNNNCCTCATTGTCTTATGC	43924793	43925252	-	0	20
INF1_smMIP_CATSPER2_17	15:43925093-43925244/17,23/+	0.797191	15	43925093	43925109	TAAGTCCAAACTTTCCC	2	43925222	43925244	AGCTGGGGCATAAGACAATGAGG	2	43925110	43925221	TTTGTTGACTAGCTCCTCTTGAACTTAAAGAAGAAATTTATGGCTTCACAAACATTTACAAGATATGACTAGTCCACTCATTATTCTGGTTCTGCCCCTGGCCACCCCCTAA	AGCTGGGGCATAAGACAATGAGGCTTCAGCTTCCCGATATCCGACGGTAGTGTNNNNNTAAGTCCAAACTTTCCC	43924793	43925252	+	0	1
INF1_smMIP_CATSPER2_18	15:43925148-43925299/16,24/-	0.723905	15	43925284	43925299	ACATGAATGATTGAGG	5	43925148	43925171	CTTGTAAATGTTTGTGAAGCCATA	2	43925172	43925283	TTGGAAGTGCCTGAGTTTAGAGTTTGGGAGTAGTTTGGCCCTCATTGTCTTATGCCCCAGCTTTAGGGGGTGGCCAGGGGCAGAACCAGAATAATGAGTGGACTAGTCATAT	CTTGTAAATGTTTGTGAAGCCATACTTCAGCTTCCCGATATCCGACGGTAGTGTNNNNNACATGAATGATTGAGG	43924793	43925252	-	0	1
INF1_smMIP_CATSPER2_19	15:43925149-43925300/16,24/+	0.705062	15	43925149	43925164	ATGGCTTCACAAACAT	5	43925277	43925300	CTTCCAACCTCAATCATTCATGTG	2	43925165	43925276	TTACAAGATATGACTAGTCCACTCATTATTCTGGTTCTGCCCCTGGCCACCCCCTAAAGCTGGGGCATAAGACAATGAGGGCCAAACTACTCCCAAACTCTAAACTCAGGCA	CTTCCAACCTCAATCATTCATGTGCTTCAGCTTCCCGATATCCGACGGTAGTGTNNNNNATGGCTTCACAAACAT	43924793	43925252	+	0	1
INF1_smMIP_CATSPER2_20	15:43927502-43927653/16,24/-	0.887337	15	43927638	43927653	ATATAACTGTCTTTGC	3	43927502	43927525	CACATGAAGGAGGAGAGGGTGGAA	2	43927526	43927637	TCTTTTTTTTTTTTGCTCTGCAGGAGAAAAAACATGTCACATGAAGCACTGACGTCAAGCCATAGCAAAATAGAGGACAGGTTAGGAGTATGTATGTGAACTGGGATAGAAA	CACATGAAGGAGGAGAGGGTGGAACTTCAGCTTCCCGATATCCGACGGTAGTGTNNNNNATATAACTGTCTTTGC	43927536	43927634	-	0	1
INF1_smMIP_CATSPER2_21	15:43927887-43928038/17,23/+	0.901856	15	43927887	43927903	TGAGAAGGAAAGTTGGG	2	43928016	43928038	AGTTAGTAACTGCCCCAAAGGGC	1	43927904	43928015	GTTGAAAAGGGAGAAGCAGACCTCTGGATGATCTGCCGCTTGAACATGTCAGCTTTGAGCTGAACCTCCCGACGCGCCATCTCCTCATTCAGCTCTTTCCTGATATTCTGAA	AGTTAGTAACTGCCCCAAAGGGCCTTCAGCTTCCCGATATCCGACGGTAGTGTNNNNNTGAGAAGGAAAGTTGGG	43927903	43928044	+	0	1
INF1_smMIP_CATSPER2_22	15:43927916-43928067/21,19/-	0.911855	15	43928047	43928067	TAGTCATTACCATCTCCCAGC	2	43927916	43927934	TCATCCAGAGGTCTGCTTC	1	43927935	43928046	TCCTAATGGCCCTTTGGGGCAGTTACTAACTTTCAGAATATCAGGAAAGAGCTGAATGAGGAGATGGCGCGTCGGGAGGTTCAGCTCAAAGCTGACATGTTCAAGCGGCAGA	TCATCCAGAGGTCTGCTTCCTTCAGCTTCCCGATATCCGACGGTAGTGTNNNNNTAGTCATTACCATCTCCCAGC	43927903	43928044	-	0	1
INF1_smMIP_CATSPER2_23	15:43928064-43928215/19,21/-	0.886401	15	43928197	43928215	TGTTTGGGAAGTGTGGTTG	2	43928064	43928084	AGCCCTCTTCCCAAGTCTAGT	2	43928085	43928196	GGAAAAAGTTATTCTGAAAGCTGGGATTGGTGGCTTATGGGTATAAAGAACCTAGTGTAGCAGGAAGGCTTGGGTTCTGGATTGGATATTTCACTTGGATTCTCCCCACCCA	AGCCCTCTTCCCAAGTCTAGTCTTCAGCTTCCCGATATCCGACGGTAGTGTNNNNNTGTTTGGGAAGTGTGGTTG	43928117	43928537	-	0	1
INF1_smMIP_CATSPER2_24	15:43928066-43928217/19,21/+	0.886401	15	43928066	43928084	TAGACTTGGGAAGAGGGCT	2	43928197	43928217	CAACCACACTTCCCAAACAAG	2	43928085	43928196	TGGGTGGGGAGAATCCAAGTGAAATATCCAATCCAGAACCCAAGCCTTCCTGCTACACTAGGTTCTTTATACCCATAAGCCACCAATCCCAGCTTTCAGAATAACTTTTTCC	CAACCACACTTCCCAAACAAGCTTCAGCTTCCCGATATCCGACGGTAGTGTNNNNNTAGACTTGGGAAGAGGGCT	43928117	43928537	+	0	1
INF1_smMIP_CATSPER2_25	15:43928173-43928324/16,24/-	0.846434	15	43928309	43928324	CAGTCGCATCTTCAGC	2	43928173	43928196	GGAAAAAGTTATTCTGAAAGCTGG	2	43928197	43928308	AGCATCTATTTCATCCTTTGGTTGTTGCTTGGCTCCATTATCTTTCGAAGTATCATAGTAGCCATGATGGGTAAGCATAGAGGAGGTGAAACTTGTTTGGGAAGTGTGGTTG	GGAAAAAGTTATTCTGAAAGCTGGCTTCAGCTTCCCGATATCCGACGGTAGTGTNNNNNCAGTCGCATCTTCAGC	43928117	43928537	-	0	1
INF1_smMIP_CATSPER2_26	15:43928181-43928332/16,24/+	0.846434	15	43928181	43928196	CAGAATAACTTTTTCC	6	43928309	43928332	GCTGAAGATGCGACTGACTTCAGG	2	43928197	43928308	CAACCACACTTCCCAAACAAGTTTCACCTCCTCTATGCTTACCCATCATGGCTACTATGATACTTCGAAAGATAATGGAGCCAAGCAACAACCAAAGGATGAAATAGATGCT	GCTGAAGATGCGACTGACTTCAGGCTTCAGCTTCCCGATATCCGACGGTAGTGTNNNNNCAGAATAACTTTTTCC	43928117	43928537	+	0	1
INF1_smMIP_CATSPER2_27	15:43928283-43928434/19,21/-	0.712036	15	43928416	43928434	CATGTCTTTTTCTTTAGGG	1	43928283	43928303	CTATTTCATCCTTTGGTTGTT	2	43928304	43928415	ACCTCCCGAATTCCCTGGTAACAGTGTTCATTCTCTTCACCTTGGATCATTGGTATGCACTGCTTCAGGACGTCTGGAAGGTGCCTGAAGTCAGTCGCATCTTCAGCAGCAT	CTATTTCATCCTTTGGTTGTTCTTCAGCTTCCCGATATCCGACGGTAGTGTNNNNNCATGTCTTTTTCTTTAGGG	43928117	43928537	-	0	1
INF1_smMIP_CATSPER2_28	15:43928285-43928436/19,21/+	0.712036	15	43928285	43928303	CAACCAAAGGATGAAATAG	2	43928416	43928436	CCCTAAAGAAAAAGACATGTG	1	43928304	43928415	ATGCTGCTGAAGATGCGACTGACTTCAGGCACCTTCCAGACGTCCTGAAGCAGTGCATACCAATGATCCAAGGTGAAGAGAATGAACACTGTTACCAGGGAATTCGGGAGGT	CCCTAAAGAAAAAGACATGTGCTTCAGCTTCCCGATATCCGACGGTAGTGTNNNNNCAACCAAAGGATGAAATAG	43928117	43928537	+	0	1
INF1_smMIP_CATSPER2_29	15:43928395-43928546/21,19/+	0.852044	15	43928395	43928415	TTACCAGGGAATTCGGGAGGT	2	43928528	43928546	TTTTGGCTCCTTTTCTACC	2	43928416	43928527	CCCTAAAGAAAAAGACATGTGAATAGACAGAAGCAGAGACCTAAACCTTTCAAAAATGGTACCATTCTTACTTTTAAAGAAACATAAAGCATTTCTTTGTAGTTTGTTCTGA	TTTTGGCTCCTTTTCTACCCTTCAGCTTCCCGATATCCGACGGTAGTGTNNNNNTTACCAGGGAATTCGGGAGGT	43928117	43928537	+	0	1
INF1_smMIP_CATSPER2_30	15:43928397-43928548/21,19/-	0.852044	15	43928528	43928548	ATGGTAGAAAAGGAGCCAAAA	2	43928397	43928415	ACCTCCCGAATTCCCTGGT	2	43928416	43928527	TCAGAACAAACTACAAAGAAATGCTTTATGTTTCTTTAAAAGTAAGAATGGTACCATTTTTGAAAGGTTTAGGTCTCTGCTTCTGTCTATTCACATGTCTTTTTCTTTAGGG	ACCTCCCGAATTCCCTGGTCTTCAGCTTCCCGATATCCGACGGTAGTGTNNNNNATGGTAGAAAAGGAGCCAAAA	43928117	43928537	-	0	1
INF1_smMIP_CATSPER2_31	15:43928447-43928598/19,21/-	0.704557	15	43928580	43928598	AACAACAAAAAAAAACTTC	12	43928447	43928467	TGAAAGGTTTAGGTCTCTGCT	2	43928468	43928579	AAACTATAGAATGATTAGCTAAAAACTGAGTATGGTAGAAAAGGAGCCAAAATCAGAACAAACTACAAAGAAATGCTTTATGTTTCTTTAAAAGTAAGAATGGTACCATTTT	TGAAAGGTTTAGGTCTCTGCTCTTCAGCTTCCCGATATCCGACGGTAGTGTNNNNNAACAACAAAAAAAAACTTC	43928117	43928537	-	0	1
INF1_smMIP_CATSPER2_32	15:43928449-43928600/19,21/+	0.704557	15	43928449	43928467	CAGAGACCTAAACCTTTCA	2	43928580	43928600	GAAGTTTTTTTTTGTTGTTGT	9	43928468	43928579	AAAATGGTACCATTCTTACTTTTAAAGAAACATAAAGCATTTCTTTGTAGTTTGTTCTGATTTTGGCTCCTTTTCTACCATACTCAGTTTTTAGCTAATCATTCTATAGTTT	GAAGTTTTTTTTTGTTGTTGTCTTCAGCTTCCCGATATCCGACGGTAGTGTNNNNNCAGAGACCTAAACCTTTCA	43928117	43928537	+	0	1
INF1_smMIP_CATSPER2_33	15:43930986-43931137/22,18/-	0.895877	15	43931116	43931137	ACCTCGTCAGGACCTGGAGTAC	1	43930986	43931003	CCAAGAAACTGAAATAGA	3	43931004	43931115	CATGTGTTCTTCTCGTAAGCAGAGCTGGGGACAGCTGGGTGAGGGGAGAAAATTTGGCTAAGAGACCAGGAAGCTTGTCCAAAGTATAGTAATATAAAAAGTGCAGTCTATT	CCAAGAAACTGAAATAGACTTCAGCTTCCCGATATCCGACGGTAGTGTNNNNNACCTCGTCAGGACCTGGAGTAC	43931080	43931246	-	0	20
INF1_smMIP_CATSPER2_34	15:43931100-43931251/16,24/+	0.913646	15	43931100	43931115	ACGAGAAGAACACATG	2	43931228	43931251	TAGAGGCCATAACTCTCATGTCAG	1	43931116	43931227	GTACTCCAGGTCCTGACGAGGTGAACGGGTGTACTCTGAGAAGACGTAGACACCAGTCACAGCAAAAATGTAGAAGAAGATGAGCAGCAACATCAAGAGGAAGGTCATGCTC	TAGAGGCCATAACTCTCATGTCAGCTTCAGCTTCCCGATATCCGACGGTAGTGTNNNNNACGAGAAGAACACATG	43931080	43931246	+	0	1
INF1_smMIP_CATSPER2_35	15:43931119-43931270/21,19/+	0.916701	15	43931119	43931139	CTCCAGGTCCTGACGAGGTGA	1	43931252	43931270	ATGTGGGCCAAACTAGGCT	1	43931140	43931251	ACGGGTGTACTCTGAGAAGACGTAGACACCAGTCACAGCAAAAATGTAGAAGAAGATGAGCAGCAACATCAAGAGGAAGGTCATGCTCTAGAGGCCATAACTCTCATGTCAG	ATGTGGGCCAAACTAGGCTCTTCAGCTTCCCGATATCCGACGGTAGTGTNNNNNCTCCAGGTCCTGACGAGGTGA	43931080	43931246	+	0	1
INF1_smMIP_CATSPER2_36	15:43931785-43931936/21,19/+	0.912579	15	43931785	43931805	AAGCCCTCACATTTATCTACC	2	43931918	43931936	CCCGGCAGATCCTCAGAAG	2	43931806	43931917	TTGCCCCCTGCTTTAGCTTGCAACAGTCAAATCACCTTGAGGGCCCTGACCAGGACCAAAATAATAATTTGAATTTGACGGAATTGTGCAAGGAGTTTGAGAGACCTCAGCA	CCCGGCAGATCCTCAGAAGCTTCAGCTTCCCGATATCCGACGGTAGTGTNNNNNAAGCCCTCACATTTATCTACC	43931819	43932016	+	0	1
INF1_smMIP_CATSPER2_37	15:43931873-43932024/16,24/-	0.541391	15	43932009	43932024	TTACTTATAACCTGTG	5	43931873	43931896	TTGCACAATTCCGTCAAATTCAAA	1	43931897	43932008	TGTTTTCCACAGTCCCTGCTTCCCGAGGTTGTGGTATTGGTAGGGGTAACAGGCCAATCGGTGTGGCTTCAGCTTCTGAGGATCTGCCGGGTGCTGAGGTCTCTCAAACTCC	TTGCACAATTCCGTCAAATTCAAACTTCAGCTTCCCGATATCCGACGGTAGTGTNNNNNTTACTTATAACCTGTG	43931819	43932016	-	10	1
INF1_smMIP_CATSPER2_38	15:43932239-43932390/16,24/+	0.794137	15	43932239	43932254	ATGAGATAATGTAAGG	13	43932367	43932390	GCAATGATTGATGTTTAGTTTTAG	2	43932255	43932366	AAAACACTTAAAATAATGCTTGGCACTTAGTAAGTGCTCAGTAACCGGCAGATGCTCTTGTTGGCATTGATGTTGTAGTTAGTCTACTTTGCTCCTAATACCAACAACTCCT	GCAATGATTGATGTTTAGTTTTAGCTTCAGCTTCCCGATATCCGACGGTAGTGTNNNNNATGAGATAATGTAAGG	43932362	43932814	+	0	1
INF1_smMIP_CATSPER2_39	15:43932350-43932501/16,24/+	0.798584	15	43932350	43932365	TAATACCAACAACTCC	3	43932478	43932501	ATTCTTCATCCCACTAAACGAACC	2	43932366	43932477	TGCAATGATTGATGTTTAGTTTTAGGGAAAAAAAATCAAAAGAAAGAAGTTAAGTAAATTTTTGTTTCTTCCTATTATCATGTTAACTTGTTCTTTCGATTCACCTAGGCAC	ATTCTTCATCCCACTAAACGAACCCTTCAGCTTCCCGATATCCGACGGTAGTGTNNNNNTAATACCAACAACTCC	43932362	43932814	+	0	1
INF1_smMIP_CATSPER2_40	15:43932357-43932508/21,19/-	0.889656	15	43932488	43932508	TCCTGAGGGTTCGTTTAGTGG	2	43932357	43932375	AATCATTGCAGGAGTTGTT	2	43932376	43932487	GATGAAGAATGTGCCTAGGTGAATCGAAAGAACAAGTTAACATGATAATAGGAAGAAACAAAAATTTACTTAACTTCTTTCTTTTGATTTTTTTTCCCTAAAACTAAACATC	AATCATTGCAGGAGTTGTTCTTCAGCTTCCCGATATCCGACGGTAGTGTNNNNNTCCTGAGGGTTCGTTTAGTGG	43932362	43932814	-	0	1
INF1_smMIP_CATSPER2_41	15:43932429-43932580/20,20/-	0.324363	15	43932561	43932580	ACTTTTCTGTTTTCTGGAAG	2	43932429	43932448	ACATGATAATAGGAAGAAAC	2	43932449	43932560	AGTGCCTGGAATGTCTTTGACTTTGTTGTTACCATGTTGGTAAGGATAGAGATCCTGAGGGTTCGTTTAGTGGGATGAAGAATGTGCCTAGGTGAATCGAAAGAACAAGTTA	ACATGATAATAGGAAGAAACCTTCAGCTTCCCGATATCCGACGGTAGTGTNNNNNACTTTTCTGTTTTCTGGAAG	43932362	43932814	-	0	20
INF1_smMIP_CATSPER2_42	15:43932458-43932609/17,23/+	0.880003	15	43932458	43932474	CTTTCGATTCACCTAGG	2	43932587	43932609	GCCACTTAAGAAGGATCTCCAGG	2	43932475	43932586	CACATTCTTCATCCCACTAAACGAACCCTCAGGATCTCTATCCTTACCAACATGGTAACAACAAAGTCAAAGACATTCCAGGCACTCTTCCAGAAAACAGAAAAGTTGGATA	GCCACTTAAGAAGGATCTCCAGGCTTCAGCTTCCCGATATCCGACGGTAGTGTNNNNNCTTTCGATTCACCTAGG	43932362	43932814	+	0	1
INF1_smMIP_CATSPER2_43	15:43932537-43932688/16,24/-	0.902863	15	43932673	43932688	TGGAATCCACAAATAC	5	43932537	43932560	AGTGCCTGGAATGTCTTTGACTTT	2	43932561	43932672	CAAACTATGGCCATTGAAGCTGACCTTGGAGGTGGCAGCTTGGTTTATCTTGCTTATTTTCATCCTGGAGATCCTTCTTAAGTGGCTATCCAACTTTTCTGTTTTCTGGAAG	AGTGCCTGGAATGTCTTTGACTTTCTTCAGCTTCCCGATATCCGACGGTAGTGTNNNNNTGGAATCCACAAATAC	43932362	43932814	-	0	1
INF1_smMIP_CATSPER2_44	15:43932546-43932697/21,19/+	0.902188	15	43932546	43932566	GACATTCCAGGCACTCTTCCA	2	43932679	43932697	GTGGATTCCAGCAATTCTG	2	43932567	43932678	GAAAACAGAAAAGTTGGATAGCCACTTAAGAAGGATCTCCAGGATGAAAATAAGCAAGATAAACCAAGCTGCCACCTCCAAGGTCAGCTTCAATGGCCATAGTTTGGTATTT	GTGGATTCCAGCAATTCTGCTTCAGCTTCCCGATATCCGACGGTAGTGTNNNNNGACATTCCAGGCACTCTTCCA	43932362	43932814	+	0	1
INF1_smMIP_CATSPER2_45	15:43932550-43932701/16,24/+	0.845818	15	43932550	43932565	TTCCAGGCACTCTTCC	12	43932678	43932701	TGTGGATTCCAGCAATTCTGTGAA	1	43932566	43932677	AGAAAACAGAAAAGTTGGATAGCCACTTAAGAAGGATCTCCAGGATGAAAATAAGCAAGATAAACCAAGCTGCCACCTCCAAGGTCAGCTTCAATGGCCATAGTTTGGTATT	TGTGGATTCCAGCAATTCTGTGAACTTCAGCTTCCCGATATCCGACGGTAGTGTNNNNNTTCCAGGCACTCTTCC	43932500	43932714	+	0	1
INF1_smMIP_CATSPER2_46	15:43932627-43932778/16,24/-	0.899512	15	43932763	43932778	CTGTGGTTTATAAGTG	5	43932627	43932650	ACCTTGGAGGTGGCAGCTTGGTTT	1	43932651	43932762	TGTTCATTCTCCATCATTCGGTTTCCAGCTTCCTTAACTTTTATTCCTCCTTTGCTCTATCTTCACAGAATTGCTGGAATCCACAAATACCAAACTATGGCCATTGAAGCTG	ACCTTGGAGGTGGCAGCTTGGTTTCTTCAGCTTCCCGATATCCGACGGTAGTGTNNNNNCTGTGGTTTATAAGTG	43932362	43932814	-	0	1
INF1_smMIP_CATSPER2_47	15:43932662-43932813/17,23/+	0.807394	15	43932662	43932678	GCCATAGTTTGGTATTT	2	43932791	43932813	CTGTTCCATTTTTCTTCACACTG	2	43932679	43932790	GTGGATTCCAGCAATTCTGTGAAGATAGAGCAAAGGAGGAATAAAAGTTAAGGAAGCTGGAAACCGAATGATGGAGAATGAACACACTTATAAACCACAGTTTTGCCCACTA	CTGTTCCATTTTTCTTCACACTGCTTCAGCTTCCCGATATCCGACGGTAGTGTNNNNNGCCATAGTTTGGTATTT	43932362	43932814	+	0	1
INF1_smMIP_CATSPER2_48	15:43932691-43932842/17,23/-	0.773888	15	43932826	43932842	TTAAGAAGAGAAACTCT	4	43932691	43932713	CTTTGCTCTATCTTCACAGAATT	1	43932714	43932825	TAACTCTTAACACAGTGTGAAGAAAAATGGAACAGTAGTGGGCAAAACTGTGGTTTATAAGTGTGTTCATTCTCCATCATTCGGTTTCCAGCTTCCTTAACTTTTATTCCTC	CTTTGCTCTATCTTCACAGAATTCTTCAGCTTCCCGATATCCGACGGTAGTGTNNNNNTTAAGAAGAGAAACTCT	43932362	43932814	-	0	1
INF1_smMIP_CATSPER2_49	15:43932699-43932850/16,24/+	0.874853	15	43932699	43932714	GAAGATAGAGCAAAGG	5	43932827	43932850	GAGTTTCTCTTCTTAACACTGTTG	2	43932715	43932826	AGGAATAAAAGTTAAGGAAGCTGGAAACCGAATGATGGAGAATGAACACACTTATAAACCACAGTTTTGCCCACTACTGTTCCATTTTTCTTCACACTGTGTTAAGAGTTAA	GAGTTTCTCTTCTTAACACTGTTGCTTCAGCTTCCCGATATCCGACGGTAGTGTNNNNNGAAGATAGAGCAAAGG	43932362	43932814	+	0	1
INF1_smMIP_CATSPER2_50	15:43939187-43939338/17,23/-	0.902804	15	43939322	43939338	ACATTTCCTTAAGAGAC	1	43939187	43939209	GGCACGCCGGCTCACACGTGTAA	1	43939210	43939321	AACAGGTCCTCTCTTCAAAAACTTCATCATCTTCCTGGTCTTTTTGAATACGATCATATTGATGGTTGAAATAGGTGAGAACTGACCTTGTATGAAAGAGGAAGTGAGGCCG	GGCACGCCGGCTCACACGTGTAACTTCAGCTTCCCGATATCCGACGGTAGTGTNNNNNACATTTCCTTAAGAGAC	43939226	43939336	-	0	1
INF1_smMIP_CATSPER2_51	15:43939207-43939358/21,19/+	0.904802	15	43939207	43939227	GCCCGGCCTCACTTCCTCTTT	1	43939340	43939358	CAGAGTGGAGTTCTTTCTG	2	43939228	43939339	CATACAAGGTCAGTTCTCACCTATTTCAACCATCAATATGATCGTATTCAAAAAGACCAGGAAGATGATGAAGTTTTTGAAGAGAGGACCTGTTGTCTCTTAAGGAAATGTA	CAGAGTGGAGTTCTTTCTGCTTCAGCTTCCCGATATCCGACGGTAGTGTNNNNNGCCCGGCCTCACTTCCTCTTT	43939226	43939336	+	0	1
INF1_smMIP_CATSPER2_52	15:43939418-43939569/16,24/-	0.920664	15	43939554	43939569	AGAGGCTGTTGAGCAG	7	43939418	43939441	ATGACTTATTTTTTGCTCCCCATA	1	43939442	43939553	GCTTCATGTGCGCTGCAGTCAGAGGCCACCTCTTTCTTTGTGGGCCGGATGGGTCCTTGAGTGTATCCTTTCATGTCACTCATTTTTATCCTGGCTGTTGATCATCTGCCTA	ATGACTTATTTTTTGCTCCCCATACTTCAGCTTCCCGATATCCGACGGTAGTGTNNNNNAGAGGCTGTTGAGCAG	43939470	43939685	-	0	1
INF1_smMIP_CATSPER2_53	15:43939524-43939675/21,19/-	0.910763	15	43939655	43939675	TTTGTTGTAGATCCTTCCCGC	2	43939524	43939542	GCTGCAGTCAGAGGCCACC	2	43939543	43939654	CAGAAGAAACTTGTATTGGGAGATCAACACCAGCTAGTGCGTTTCTCTATAAAGCCTCAGCGTATAGAACAGATTTCACATGCCCAGAGGCTGTTGAGCAGGCTTCATGTGC	GCTGCAGTCAGAGGCCACCCTTCAGCTTCCCGATATCCGACGGTAGTGTNNNNNTTTGTTGTAGATCCTTCCCGC	43939470	43939685	-	0	1
INF1_smMIP_CATSPER2_54	15:43939584-43939735/22,18/-	0.922933	15	43939714	43939735	CCTGCCCCCAACCCTACCTGGT	2	43939584	43939601	GCCTCAGCGTATAGAACA	1	43939602	43939713	CTATTTTGTTTGTATTTATCCACTATCCCTTTTTAATTTTTGTTGTAGATCCTTCCCGCCAGAAGAAACTTGTATTGGGAGATCAACACCAGCTAGTGCGTTTCTCTATAAA	GCCTCAGCGTATAGAACACTTCAGCTTCCCGATATCCGACGGTAGTGTNNNNNCCTGCCCCCAACCCTACCTGGT	43939470	43939685	-	0	1
INF1_smMIP_CATSPER2_55	15:43940065-43940216/21,19/-	0.904968	15	43940196	43940216	CTGATGCCATTCGTTCACGTC	2	43940065	43940083	TTAAGACTCCTATCCACAT	2	43940084	43940195	TCATCGATACTTTCTCTCTCATTGAGCATTTGCAAGGCTTGAGCCAAGCTGTGCCGCGGCACACTATCAGGGAGTTACTTGGTCAGCAGCCTATTTCTTCACTAATTTAAAT	TTAAGACTCCTATCCACATCTTCAGCTTCCCGATATCCGACGGTAGTGTNNNNNCTGATGCCATTCGTTCACGTC	43940093	43940284	-	0	10
INF1_smMIP_CATSPER2_56	15:43940172-43940323/19,21/-	0.91134	15	43940305	43940323	CTGTAATCCTTGGTGCAGC	3	43940172	43940192	TCGATACTTTCTCTCTCATTG	1	43940193	43940304	TCCAAGAATGAAATGACACTTGATGCTTACATTTTCTTAGCAGACATGGCCGCTTACCAACAAGAAGAGCAGATGCAGCTTCCCCGAGCTGATGCCATTCGTTCACGTCTCA	TCGATACTTTCTCTCTCATTGCTTCAGCTTCCCGATATCCGACGGTAGTGTNNNNNCTGTAATCCTTGGTGCAGC	43940093	43940284	-	0	20
INF1_smMIP_CATSPER2_57	15:43940906-43941057/21,19/-	0.0482789	15	43941037	43941057	AGTGGCTGGGCGAGCGTTGCT	1	43940906	43940924	GAGCTCGTCTTGCATAGGG	1	43940925	43941036	CCGCATGGTCCTGGGCTGTGGGTAGGGGCTAGGGCCGGGTCCCGGGGTGAGCCGAAACCTGGGGGTCGAGCGGGGCGGGGAATGGGGCGCAGTGAGGCTGGGAGCCGGCCCT	GAGCTCGTCTTGCATAGGGCTTCAGCTTCCCGATATCCGACGGTAGTGTNNNNNAGTGGCTGGGCGAGCGTTGCT	43940998	43941052	-	0	20
INF1_smMIP_CATSPER2_58	15:43941017-43941168/16,24/+	0.124564	15	43941017	43941032	CACAGCCCAGGACCAT	11	43941145	43941168	CAATCAGCGGCTGCCACACAGCGG	2	43941033	43941144	GCGGAGCAACGCTCGCCCAGCCACTCGCCGCCTAGGCCCCGCCCCGCCCCGCTCTCCGGCCACTCAGCGGTAACCAGCTGGTCCCGCCCGCCGGACGAAGGCGACGCGCAGC	CAATCAGCGGCTGCCACACAGCGGCTTCAGCTTCCCGATATCCGACGGTAGTGTNNNNNCACAGCCCAGGACCAT	43940998	43941052	+	0	20
INF1_smMIP_KLHL10_1	17:39994141-39994292/16,24/-	0.826925	17	39994277	39994292	GCCCTCTAGTCTAAGC	1	39994141	39994164	AGAGGCTGCTTTCCTAGGGTGTCG	1	39994165	39994276	TCGTTGAAGATCTCACAGGCCATCGCACTCATCTTCCTCTCCATGTGAGGCTGGTGGAAACGTGTGGAGGCCGCCGCGCTCTCCATCTCCATGGCACCCTGGGACAGCGGAG	AGAGGCTGCTTTCCTAGGGTGTCGCTTCAGCTTCCCGATATCCGACGGTAGTGTNNNNNGCCCTCTAGTCTAAGC	39994163	39994398	-	0	1
INF1_smMIP_KLHL10_2	17:39994145-39994296/17,23/+	0.776697	17	39994145	39994161	ACCCTAGGAAAGCAGCC	1	39994274	39994296	CGAGCTTAGACTAGAGGGCAAGC	1	39994162	39994273	TCTCTCCGCTGTCCCAGGGTGCCATGGAGATGGAGAGCGCGGCGGCCTCCACACGTTTCCACCAGCCTCACATGGAGAGGAAGATGAGTGCGATGGCCTGTGAGATCTTCAA	CGAGCTTAGACTAGAGGGCAAGCCTTCAGCTTCCCGATATCCGACGGTAGTGTNNNNNACCCTAGGAAAGCAGCC	39994163	39994398	+	0	1
INF1_smMIP_KLHL10_3	17:39994253-39994404/20,20/-	0.911349	17	39994385	39994404	GGCTGAATTTGGCAACCCTG	1	39994253	39994272	TGAAGATCTCACAGGCCATC	1	39994273	39994384	TTATACCTAAAGTAGGAACTGCAGCTACAGAGGATGTTCTTATGGGCACTGAACTCAAAGCCATTGACCTTGATGACCACGTCGCAGAGCTTGCCCTCTAGTCTAAGCTCGT	TGAAGATCTCACAGGCCATCCTTCAGCTTCCCGATATCCGACGGTAGTGTNNNNNGGCTGAATTTGGCAACCCTG	39994163	39994398	-	0	1
INF1_smMIP_KLHL10_4	17:39994312-39994463/18,22/-	0.902178	17	39994446	39994463	ATGGGGTGGGAAACAGAA	3	39994312	39994333	AACTCAAAGCCATTGACCTTGA	1	39994334	39994445	AATGGATCAAAGTGTCTCAAAATGAGCCCAATTACCCCTTTGGCTGAATTTGGCAACCCTGTTATACCTAAAGTAGGAACTGCAGCTACAGAGGATGTTCTTATGGGCACTG	AACTCAAAGCCATTGACCTTGACTTCAGCTTCCCGATATCCGACGGTAGTGTNNNNNATGGGGTGGGAAACAGAA	39994163	39994398	-	0	1
INF1_smMIP_KLHL10_5	17:39997996-39998147/22,18/-	0.950027	17	39998126	39998147	CATGTCGGGAGAAATGCCAGGG	1	39997996	39998013	TGGAAATGGTCTGAGAAA	1	39998014	39998125	ATGTTGTATACCTTCTTTTCAGTGTTGTTCCAGCCACTTGTAAACAAAGCTCTGGAAAAAAGAAAGAAACTAGCAGCCACGGAAACATTTCTCTCCTGTTAGGTGAGTACAT	TGGAAATGGTCTGAGAAACTTCAGCTTCCCGATATCCGACGGTAGTGTNNNNNCATGTCGGGAGAAATGCCAGGG	39998053	39998584	-	10	20
INF1_smMIP_KLHL10_6	17:39998091-39998242/17,23/-	0.906494	17	39998226	39998242	ATGTTAAACTGGTCTGC	2	39998091	39998113	TTCTTTTCAGTGTTGTTCCAGCC	1	39998114	39998225	AGCAGCAAGCAGTTTCTCCACATTGTCCGGTGTGATAGGCACGGTCCGGGTGTATGCATACTCAATGATTAGCTTCATCATGTCGGGAGAAATGCCAGGGATGTTGTATACC	TTCTTTTCAGTGTTGTTCCAGCCCTTCAGCTTCCCGATATCCGACGGTAGTGTNNNNNATGTTAAACTGGTCTGC	39998053	39998584	-	0	1
INF1_smMIP_KLHL10_7	17:39998207-39998358/21,19/-	0.912612	17	39998338	39998358	CCTTCTGCCTCAGCTCAGGAC	1	39998207	39998225	AGCAGCAAGCAGTTTCTCC	1	39998226	39998337	AGTAGTAGTAGTCCGTGAACTTACAGATGCCGATACAATTATCCAAGCACAGCTCTGACTTGAGGAACTCGCAGCAACCCCTGACGATACCCATGATGTTAAACTGGTCTGC	AGCAGCAAGCAGTTTCTCCCTTCAGCTTCCCGATATCCGACGGTAGTGTNNNNNCCTTCTGCCTCAGCTCAGGAC	39998053	39998584	-	0	1
INF1_smMIP_KLHL10_8	17:39998286-39998437/22,18/+	0.904487	17	39998286	39998307	CTGTGCTTGGATAATTGTATCG	1	39998420	39998437	GCTCTCGGTCACTGAACT	1	39998308	39998419	GCATCTGTAAGTTCACGGACTACTACTACTGTCCTGAGCTGAGGCAGAAGGCCTACATGTTCATACTGCACAACTTTGAGGAGATGGTGAAAGTCTCGGCAGAATTTTTAGA	GCTCTCGGTCACTGAACTCTTCAGCTTCCCGATATCCGACGGTAGTGTNNNNNCTGTGCTTGGATAATTGTATCG	39998053	39998584	+	0	1
INF1_smMIP_KLHL10_9	17:39998366-39998517/17,23/+	0.831883	17	39998366	39998382	GTTCATACTGCACAACT	1	39998495	39998517	GGCCATTTTAAAGTGGATTTCTC	1	39998383	39998494	TTGAGGAGATGGTGAAAGTCTCGGCAGAATTTTTAGAGCTCTCGGTCACTGAACTTAAGGATATCATTGAGAAAGATGAGCTCAATGTCAAACAGGAAGATGCTGTATTTGA	GGCCATTTTAAAGTGGATTTCTCCTTCAGCTTCCCGATATCCGACGGTAGTGTNNNNNGTTCATACTGCACAACT	39998053	39998584	+	0	1
INF1_smMIP_KLHL10_10	17:39998457-39998608/17,23/-	0.84871	17	39998592	39998608	AGGACAATCTCTCTGTG	2	39998457	39998479	TCCTGTTTGACATTGAGCTCATC	1	39998480	39998591	ATAAATGAATCAAGAGTGAACACTGACCTTAGGAAGCAAAATTGAAATGTGCTGCTTTCTATTTTGGGGGTCATGAGAAATCCACTTTAAAATGGCCTCAAATACAGCATCT	TCCTGTTTGACATTGAGCTCATCCTTCAGCTTCCCGATATCCGACGGTAGTGTNNNNNAGGACAATCTCTCTGTG	39998053	39998584	-	0	1
INF1_smMIP_KLHL10_11	17:39998487-39998638/17,23/-	0.878483	17	39998622	39998638	GGATCTGTCATATGTCT	1	39998487	39998509	CACTTTAAAATGGCCTCAAATAC	1	39998510	39998621	GAATTTTGCTTTTAGGACAATCTCTCTGTGATAAATGAATCAAGAGTGAACACTGACCTTAGGAAGCAAAATTGAAATGTGCTGCTTTCTATTTTGGGGGTCATGAGAAATC	CACTTTAAAATGGCCTCAAATACCTTCAGCTTCCCGATATCCGACGGTAGTGTNNNNNGGATCTGTCATATGTCT	39998053	39998584	-	0	1
INF1_smMIP_KLHL10_12	17:40001323-40001474/17,23/-	0.906266	17	40001458	40001474	TAATGATGACTGGTTTG	2	40001323	40001345	ACGTGAGAGTGCCAGGAAATCCC	1	40001346	40001457	CATTCCTCACTGTCTTTGACATAGTCATTCATCTTAACATTGTTCATGAAGTACTCAGCATGCATTAGGGCCAGGCGAACCTAAGAAGCAAACGCAGAAAGTCATTCAGGTG	ACGTGAGAGTGCCAGGAAATCCCCTTCAGCTTCCCGATATCCGACGGTAGTGTNNNNNTAATGATGACTGGTTTG	40001356	40002072	-	0	1
INF1_smMIP_KLHL10_13	17:40001402-40001553/22,18/+	0.914861	17	40001402	40001423	GAGTACTTCATGAACAATGTTA	1	40001536	40001553	CCCACTCACCAGACCACG	1	40001424	40001535	AGATGAATGACTATGTCAAAGACAGTGAGGAATGCAAACCAGTCATCATTAATGCCCTAAAGGCCATGTATGACCTCAACATGAATGGACCCTCTAATTCTGATTTCACCAA	CCCACTCACCAGACCACGCTTCAGCTTCCCGATATCCGACGGTAGTGTNNNNNGAGTACTTCATGAACAATGTTA	40001356	40002072	+	0	1
INF1_smMIP_KLHL10_14	17:40001485-40001636/16,24/-	0.855247	17	40001621	40001636	CCCGAGCGTCATATGC	1	40001485	40001508	TTCATGTTGAGGTCATACATGGCC	1	40001509	40001620	CTCAATGGCATTGGTGGGGCTCCCACCACTCCAGCCACCAATTGCAAAGAGGATGGCATAGGGCAAGCGTGGTCTGGTGAGTGGGTTGGTGAAATCAGAATTAGAGGGTCCA	TTCATGTTGAGGTCATACATGGCCCTTCAGCTTCCCGATATCCGACGGTAGTGTNNNNNCCCGAGCGTCATATGC	40001356	40002072	-	0	1
INF1_smMIP_KLHL10_15	17:40001527-40001678/18,22/-	0.897343	17	40001661	40001678	GGGGACTCTCTTCCTCAC	1	40001527	40001548	TCTGGTGAGTGGGTTGGTGAAA	1	40001549	40001660	AAGTAACATTCACCCATCTGTCTGCCCGAGCGTCATATGCCTCAATGGCATTGGTGGGGCTCCCACCACTCCAGCCACCAATTGCAAAGAGGATGGCATAGGGCAAGCGTGG	TCTGGTGAGTGGGTTGGTGAAACTTCAGCTTCCCGATATCCGACGGTAGTGTNNNNNGGGGACTCTCTTCCTCAC	40001356	40002072	-	0	1
INF1_smMIP_KLHL10_16	17:40001624-40001775/16,24/+	0.843191	17	40001624	40001639	TATGACGCTCGGGCAG	1	40001752	40001775	CAATAGTGTTAAGCGTTTTGACCC	1	40001640	40001751	ACAGATGGGTGAATGTTACTTGTGAGGAAGAGAGTCCCCGTGCCTACCATGGGGCAGCCTATTTGAAAGGCTATGTGTATATCATTGGGGGGTTTGATAGTGTAGACTATTT	CAATAGTGTTAAGCGTTTTGACCCCTTCAGCTTCCCGATATCCGACGGTAGTGTNNNNNTATGACGCTCGGGCAG	40001356	40002072	+	0	1
INF1_smMIP_KLHL10_17	17:40001729-40001880/21,19/+	0.908136	17	40001729	40001749	GGGTTTGATAGTGTAGACTAT	1	40001862	40001880	CCATGGGAGGATTTGATGG	1	40001750	40001861	TTCAATAGTGTTAAGCGTTTTGACCCAGTCAAGAAAACTTGGCATCAGGTGGCCCCGATGCACTCCAGACGTTGCTATGTCAGTGTGACAGTCCTCGGCAATTTTATTTATG	CCATGGGAGGATTTGATGGCTTCAGCTTCCCGATATCCGACGGTAGTGTNNNNNGGGTTTGATAGTGTAGACTAT	40001356	40002072	+	0	1
INF1_smMIP_KLHL10_18	17:40001833-40001984/22,18/+	0.909207	17	40001833	40001854	TGTGACAGTCCTCGGCAATTTT	1	40001967	40001984	ATGCAAGCGCCACAACAC	1	40001855	40001966	ATTTATGCCATGGGAGGATTTGATGGCTACGTGCGTCTAAACACTGCTGAACGTTATGAGCCAGAGACCAATCAATGGACACTCATCGCCCCCATGCACGAACAGAGGAGTG	ATGCAAGCGCCACAACACCTTCAGCTTCCCGATATCCGACGGTAGTGTNNNNNTGTGACAGTCCTCGGCAATTTT	40001356	40002072	+	0	1
INF1_smMIP_KLHL10_19	17:40001946-40002097/19,21/-	0.903642	17	40002079	40002097	GAATACTGCCACTGCGTCT	1	40001946	40001966	CACTCCTCTGTTCGTGCATGG	1	40001967	40002078	TCCATCCACCCCAAAAAAGAGCAGTATCATTTCTGGTCTTGTACTTTGCATCCACATCTTCCCCTCCCACCCTGGTCCTTTACCTTCCCATAAAGTGTTGTGGCGCTTGCAT	CACTCCTCTGTTCGTGCATGGCTTCAGCTTCCCGATATCCGACGGTAGTGTNNNNNGAATACTGCCACTGCGTCT	40001356	40002072	-	0	1
INF1_smMIP_KLHL10_20	17:40003474-40003625/17,23/+	0.903848	17	40003474	40003490	AGAGTGGGAATTTTAAT	1	40003603	40003625	CCCATGAGAAGCAGGAGGAGTGG	1	40003491	40003602	AATCTTGGAACTCTTCACACAGGTCTACATATGTGGTGGGTTTAATGGAAACGAGTGCCTGTTCACAGCAGAAGTGTATAACACTGAAAGTAATCAGTGGACAGTCATAGCA	CCCATGAGAAGCAGGAGGAGTGGCTTCAGCTTCCCGATATCCGACGGTAGTGTNNNNNAGAGTGGGAATTTTAAT	40003491	40003682	+	0	1
INF1_smMIP_KLHL10_21	17:40003587-40003738/16,24/+	0.747322	17	40003587	40003602	GTGGACAGTCATAGCA	1	40003715	40003738	TGTATTAGTAAATGGGTTTATGCT	1	40003603	40003714	CCCATGAGAAGCAGGAGGAGTGGAATAGGCGTGATTGCTTATGGAGAACATGTATATGCGGTAAGTTTATCTAGTACCACACACACACAAAAAACACATTACCCCTAGATTT	TGTATTAGTAAATGGGTTTATGCTCTTCAGCTTCCCGATATCCGACGGTAGTGTNNNNNGTGGACAGTCATAGCA	40003491	40003682	+	0	1
INF1_smMIP_KLHL10_22	17:40003593-40003744/17,23/-	0.89796	17	40003728	40003744	AATAGTAGCATAAACCC	1	40003593	40003615	TGCTTCTCATGGGTGCTATGACT	1	40003616	40003727	ATTTACTAATACAAAATCTAGGGGTAATGTGTTTTTTGTGTGTGTGTGGTACTAGATAAACTTACCGCATATACATGTTCTCCATAAGCAATCACGCCTATTCCACTCCTCC	TGCTTCTCATGGGTGCTATGACTCTTCAGCTTCCCGATATCCGACGGTAGTGTNNNNNAATAGTAGCATAAACCC	40003491	40003682	-	0	1
INF1_smMIP_KLHL10_23	17:40004103-40004254/19,21/-	0.907493	17	40004236	40004254	GCCAAGTGTTAGCCACAGG	2	40004103	40004123	CCTTGTTGGGGGTACCAGTGA	1	40004124	40004235	GCTGTAGGCTTCGGCACTCCTAAGTCGATTAGCTCCATCAAAGCCACCTACCTGTGGATAGCAAAAGAAACACGGTTGACTGCTAACCATTGATTCTGTTCACTGAGGAAGC	CCTTGTTGGGGGTACCAGTGACTTCAGCTTCCCGATATCCGACGGTAGTGTNNNNNGCCAAGTGTTAGCCACAGG	40004163	40004579	-	0	1
INF1_smMIP_KLHL10_24	17:40004192-40004343/22,18/+	0.921329	17	40004192	40004213	GCTTTGATGGAGCTAATCGACT	1	40004326	40004343	GTGGGTGGCTTTAATGGT	1	40004214	40004325	TAGGAGTGCCGAAGCCTACAGCCCTGTGGCTAACACTTGGCGCACAATCCCCACTATGTTTAATCCTCGTAGCAATTTTGGCATCGAGGTGGTGGATGACCTCTTGTTTGTG	GTGGGTGGCTTTAATGGTCTTCAGCTTCCCGATATCCGACGGTAGTGTNNNNNGCTTTGATGGAGCTAATCGACT	40004163	40004579	+	0	1
INF1_smMIP_KLHL10_25	17:40004308-40004459/22,18/-	0.968996	17	40004438	40004459	GCCAGCCCTGGTACTACACAGC	1	40004308	40004325	CACAAACAAGAGGTCATC	1	40004326	40004437	AGCTCAGAGCACTGCGGTATATACTCATGTCATGAGCATCATACCACTCATCGGTCTTTTCATCATAGCACTCAACATTAAAGGTGGTGGTAAAACCATTAAAGCCACCCAC	CACAAACAAGAGGTCATCCTTCAGCTTCCCGATATCCGACGGTAGTGTNNNNNGCCAGCCCTGGTACTACACAGC	40004163	40004579	-	0	1
INF1_smMIP_KLHL10_26	17:40004412-40004563/22,18/+	0.900183	17	40004412	40004433	GAGTATATACCGCAGTGCTCTG	1	40004546	40004563	CCCTACCTGTATGAGCCT	1	40004434	40004545	AGCTGCTGTGTAGTACCAGGGCTGGCCAATGTTGAGGAATATGCAGCTAGACGGGACAACTTCCCAGGATTAGCACTGCGAGATGAAGTAAAATATTCTGCTTCGACAAGTA	CCCTACCTGTATGAGCCTCTTCAGCTTCCCGATATCCGACGGTAGTGTNNNNNGAGTATATACCGCAGTGCTCTG	40004163	40004579	+	0	1
INF1_smMIP_KLHL10_27	17:40004498-40004649/17,23/+	0.835188	17	40004498	40004514	CAGGATTAGCACTGCGA	1	40004627	40004649	GTTTAAACTTTGAAGAGTACTGG	1	40004515	40004626	GATGAAGTAAAATATTCTGCTTCGACAAGTACCCTACCTGTATGAGCCTCTTCATTTAGCTAATAAAAAGTCTAAGCAATAAGAATTAATTCTTTTTTTAAAAAAATGCAGT	GTTTAAACTTTGAAGAGTACTGGCTTCAGCTTCCCGATATCCGACGGTAGTGTNNNNNCAGGATTAGCACTGCGA	40004163	40004579	+	0	1
INF1_smMIP_CCDC40_1	17:78010387-78010538/19,21/-	0.140972	17	78010520	78010538	AGCGCGGCCTGGCGACTCC	1	78010387	78010407	TGCGAGGGCGGGGGCCGCCGG	1	78010408	78010519	AAGACCCGCTGCCCCTCGGCCCGGCTTACCGGCCCGCCGCGCCGCCCGGTTCCGCCATTTCCCGTTGCTAGGCGACGCTGTCAACATCCGGCCGGGCCGGGACCACGCGCGC	TGCGAGGGCGGGGGCCGCCGGCTTCAGCTTCCCGATATCCGACGGTAGTGTNNNNNAGCGCGGCCTGGCGACTCC	78010440	78010510	-	0	20
INF1_smMIP_CCDC40_2	17:78011844-78011995/18,22/+	0.911237	17	78011844	78011861	GCAGAATTCAGGAGGGGA	1	78011974	78011995	GAAAGCCACATGGTAAAATTCC	1	78011862	78011973	TAAGGACCAAGAAAAAGAAAGCTGTTGCTTGAAACTGTTCAATTGTTTCTCTAAAACCAGGTCCCATCCGGAAGATGGATCGGCTTCTGAGGGAGAGAAGGAAGGGAATAAT	GAAAGCCACATGGTAAAATTCCCTTCAGCTTCCCGATATCCGACGGTAGTGTNNNNNGCAGAATTCAGGAGGGGA	78011900	78012005	+	0	1
INF1_smMIP_CCDC40_3	17:78011902-78012053/18,22/-	0.792782	17	78012036	78012053	CCGTACTCTGATTCTCTT	1	78011902	78011923	ACCTGGTTTTAGAGAAACAATT	1	78011924	78012035	TAATTCCTAGTAAATATAAGCCCGGAATAACTGCCCATAGGGAATTTTACCATGTGGCTTTCATTATTCCCTTCCTTCTCTCCCTCAGAAGCCGATCCATCTTCCGGATGGG	ACCTGGTTTTAGAGAAACAATTCTTCAGCTTCCCGATATCCGACGGTAGTGTNNNNNCCGTACTCTGATTCTCTT	78011900	78012005	-	0	1
INF1_smMIP_CCDC40_4	17:78013542-78013693/16,24/-	0.906806	17	78013678	78013693	TGGGTTGTGACTTCCT	2	78013542	78013565	GACCTTGTGAGGTTTTATTCTTTA	1	78013566	78013677	CAGGATGCTCTGTGCTACCGACAGCTTCTTCACCTTTCTGGCCATCATCCTTCTCTGGTGGTGACACCTGTAAAGGTGTGGCAGGAAAAAAATCAGGAAACAAAGTATAAAG	GACCTTGTGAGGTTTTATTCTTTACTTCAGCTTCCCGATATCCGACGGTAGTGTNNNNNTGGGTTGTGACTTCCT	78013589	78014089	-	0	1
INF1_smMIP_CCDC40_5	17:78013641-78013792/17,23/-	0.902416	17	78013776	78013792	TCGCTTTCAGCATCTCC	2	78013641	78013663	CTACCGACAGCTTCTTCACCTTT	1	78013664	78013775	ATAGGACACAGCCTCCTCTTCCCCTTCCACTGCTGCTTCCCCTTCTGTCTCCACCTCCCCCTCTTCAATTGCAGCTTCCGCTTGGGTTGTGACTTCCTCAGGATGCTCTGTG	CTACCGACAGCTTCTTCACCTTTCTTCAGCTTCCCGATATCCGACGGTAGTGTNNNNNTCGCTTTCAGCATCTCC	78013589	78014089	-	0	1
INF1_smMIP_CCDC40_6	17:78013758-78013909/18,22/+	0.943919	17	78013758	78013775	GAGGAGGCTGTGTCCTAT	1	78013888	78013909	CTGGAGAGGAGGCATACGATAG	1	78013776	78013887	GGAGATGCTGAAAGCGAAGAGGAATATTACTATACAGAAACTTCATCCCCGGAAGGGCAAATCAGTGCTGCAGATACGACTTACCCGTATTTCAGTCCTCCTCAGGAACTGC	CTGGAGAGGAGGCATACGATAGCTTCAGCTTCCCGATATCCGACGGTAGTGTNNNNNGAGGAGGCTGTGTCCTAT	78013589	78014089	+	0	1
INF1_smMIP_CCDC40_7	17:78013855-78014006/22,18/+	0.928698	17	78013855	78013876	CTTACCCGTATTTCAGTCCTCC	1	78013989	78014006	TCCCCAGAGCCATCCCAC	1	78013877	78013988	TCAGGAACTGCCTGGAGAGGAGGCATACGATAGTGTTAGCGGGGAGGCTGGTCTCCAAGGCTTCCAGCAAGAGGCCACCGGTCCACCAGAATCCAGAGAAAGGAGGGTCACC	TCCCCAGAGCCATCCCACCTTCAGCTTCCCGATATCCGACGGTAGTGTNNNNNCTTACCCGTATTTCAGTCCTCC	78013589	78014089	+	0	1
INF1_smMIP_CCDC40_8	17:78013955-78014106/18,22/-	0.845265	17	78014089	78014106	GCGACACTGGCACAAAAC	1	78013955	78013976	TTCTCTGGATTCTGGTGGACCG	1	78013977	78014088	AGAAGTCAGGGCTACTCACCAATCTGCCCACTGCTGGCCCAGAGGTGACCTGGCCCATTTGCTCCGACGGGCCTAAGACTCCGTGGGATGGCTCTGGGGAGGTGACCCTCCT	TTCTCTGGATTCTGGTGGACCGCTTCAGCTTCCCGATATCCGACGGTAGTGTNNNNNGCGACACTGGCACAAAAC	78013589	78014089	-	0	1
INF1_smMIP_CCDC40_9	17:78014049-78014200/20,20/+	0.901907	17	78014049	78014068	GGGCCAGCAGTGGGCAGATT	1	78014181	78014200	GAAATGTCTTAGCAAGGCTG	1	78014069	78014180	GGTGAGTAGCCCTGACTTCTGTTTTGTGCCAGTGTCGCACGGCCCACGGGGTTTGTCACCCTATGTGAGGAACTTGGGAATACATTATAAATACAAATTGCAATCCCTGTTA	GAAATGTCTTAGCAAGGCTGCTTCAGCTTCCCGATATCCGACGGTAGTGTNNNNNGGGCCAGCAGTGGGCAGATT	78013589	78014089	+	0	1
INF1_smMIP_CCDC40_10	17:78021000-78021151/19,21/-	0.648622	17	78021133	78021151	CCGTGGCTCAGCCGGAAGC	1	78021000	78021020	TTCAATTTTAACTCATTACAT	1	78021021	78021132	GGTGCTGGACGCCCATTGGGAGCACCTGCCCCTGGGGCTCCTCTGTGGATCCTGTCTATGGCAAGAACAACCAAAACTAAGTCAACAGGGCTTAATTGCCACTGAGAAGTTA	TTCAATTTTAACTCATTACATCTTCAGCTTCCCGATATCCGACGGTAGTGTNNNNNCCGTGGCTCAGCCGGAAGC	78021056	78021221	-	0	20
INF1_smMIP_CCDC40_11	17:78021040-78021191/19,21/-	0.645528	17	78021173	78021191	CGAGACGAACTCCTCCAGG	1	78021040	78021060	AAAACTAAGTCAACAGGGCTT	1	78021061	78021172	TCTGAGGACTCGATGTCGCTCCCGTGGCTCAGCCGGAAGCGGTGCTGGACGCCCATTGGGAGCACCTGCCCCTGGGGCTCCTCTGTGGATCCTGTCTATGGCAAGAACAACC	AAAACTAAGTCAACAGGGCTTCTTCAGCTTCCCGATATCCGACGGTAGTGTNNNNNCGAGACGAACTCCTCCAGG	78021056	78021221	-	0	1
INF1_smMIP_CCDC40_12	17:78021157-78021308/16,24/+	0.542447	17	78021157	78021172	ACATCGAGTCCTCAGA	1	78021285	78021308	GTCATCCGTTACCTGTTTCCTGAG	1	78021173	78021284	CCTGGAGGAGTTCGTCTCGCAGGAGCCAGGTGCCACCCACCTGCTGAGGTCACCCTGCCCTGGCGATGAGCCACCTGCACAGGCCCTTCTGTGCAAGGGATGCCACTCGTTT	GTCATCCGTTACCTGTTTCCTGAGCTTCAGCTTCCCGATATCCGACGGTAGTGTNNNNNACATCGAGTCCTCAGA	78021056	78021221	+	0	1
INF1_smMIP_CCDC40_13	17:78022285-78022436/16,24/-	0.626584	17	78022421	78022436	AACACTGGCAGGTCTC	2	78022285	78022308	ATGGCACAGCTGCTGTCATGCCTC	1	78022309	78022420	CTTCCCTGGGGTGGGCATCGGGCACCCCTGGGGGGATCACTGGGGGGAGAGACAGCGACACCATTGAGGAGCTGCTGGAGAGAAGCCTCAGTGATTCTATTCTGGGGCATCA	ATGGCACAGCTGCTGTCATGCCTCCTTCAGCTTCCCGATATCCGACGGTAGTGTNNNNNAACACTGGCAGGTCTC	78022360	78022580	-	0	1
INF1_smMIP_CCDC40_14	17:78022397-78022548/17,23/-	0.659259	17	78022532	78022548	CAAAACCACCAGCTGGG	2	78022397	78022419	TTCCCTGGGGTGGGCATCGGGCA	1	78022420	78022531	ACCCTTCGTCTTCTGCTTCCTCGTCACTCCCCTCGGACTCCACTCTCTCTGCCATGGCCCCCTCCTCGGTGCTGGGCTGCTGGATCTGGTCCTGGAACACTGGCAGGTCTCC	TTCCCTGGGGTGGGCATCGGGCACTTCAGCTTCCCGATATCCGACGGTAGTGTNNNNNCAAAACCACCAGCTGGG	78022360	78022580	-	0	1
INF1_smMIP_CCDC40_15	17:78022479-78022630/16,24/-	0.87271	17	78022615	78022630	GGCAGAGAAAGGGGCC	6	78022479	78022502	CCCTCGGACTCCACTCTCTCTGCC	1	78022503	78022614	TGAGTCATTCGCCATCCATGTAGGCAAAAGCAAAACCTGGGAAGGCTTCCTTACGTGGTCTGGGTCCAAAACCACCAGCTGGGACCCTTCGTCTTCTGCTTCCTCGTCACTC	CCCTCGGACTCCACTCTCTCTGCCCTTCAGCTTCCCGATATCCGACGGTAGTGTNNNNNGGCAGAGAAAGGGGCC	78022360	78022580	-	0	1
INF1_smMIP_CCDC40_16	17:78023658-78023809/19,21/+	0.904847	17	78023658	78023676	GGAGGGTAACCAGAAAGGT	1	78023789	78023809	GTGTGTATCCGTCCAGTCTCC	1	78023677	78023788	AACCACCTGTGGTTTTCCATTGTTCTAGCCCCTGATGGTAAGATTCCAGGCTGCCCTGAAGAACTACCTGAACCGACAGATCGAAAAGTTGAAGCTGGACCTCCAAGAGCTG	GTGTGTATCCGTCCAGTCTCCCTTCAGCTTCCCGATATCCGACGGTAGTGTNNNNNGGAGGGTAACCAGAAAGGT	78023683	78024102	+	0	1
INF1_smMIP_CCDC40_17	17:78023762-78023913/18,22/+	0.869078	17	78023762	78023779	AAGTTGAAGCTGGACCTC	1	78023892	78023913	GCGGCAGGAGCTGGGGGTGAAT	1	78023780	78023891	CAAGAGCTGGTGTGTATCCGTCCAGTCTCCCACCCTGGTCGGATGCCTGCGTCCTGGTGACCCTGTTTCTCTCTTTGGTCCAGGTTGTGGCTACCAAGCAGAGCCGAGCCCA	GCGGCAGGAGCTGGGGGTGAATCTTCAGCTTCCCGATATCCGACGGTAGTGTNNNNNAAGTTGAAGCTGGACCTC	78023683	78024102	+	0	1
INF1_smMIP_CCDC40_18	17:78023833-78023984/16,24/-	0.910072	17	78023969	78023984	ATTGCGTGGCGGTCGT	1	78023833	78023856	CAAAGAGAGAAACAGGGTCACCAG	1	78023857	78023968	GACTCTTCTCCAGCAGCTTCTGCAGGTGTACCAGGTGCTGCTGCACCTCATAGAGATTCACCCCCAGCTCCTGCCGCTGGGCTCGGCTCTGCTTGGTAGCCACAACCTGGAC	CAAAGAGAGAAACAGGGTCACCAGCTTCAGCTTCCCGATATCCGACGGTAGTGTNNNNNATTGCGTGGCGGTCGT	78023683	78024102	-	0	1
INF1_smMIP_CCDC40_19	17:78023890-78024041/16,24/-	0.788054	17	78024026	78024041	TAGAGAGCGCGGGCGG	1	78023890	78023913	ATTCACCCCCAGCTCCTGCCGCTG	1	78023914	78024025	CCTGCAGCTCCTCCTCCTTCTGCCTGCGCTCGCTCGAGGCCATTGCGTGGCGGTCGTGACTCTTCTCCAGCAGCTTCTGCAGGTGTACCAGGTGCTGCTGCACCTCATAGAG	ATTCACCCCCAGCTCCTGCCGCTGCTTCAGCTTCCCGATATCCGACGGTAGTGTNNNNNTAGAGAGCGCGGGCGG	78023683	78024102	-	0	1
INF1_smMIP_CCDC40_20	17:78023987-78024138/18,22/-	0.655281	17	78024121	78024138	ACCCCTGGGAAACCCTCC	1	78023987	78024008	TTCTGCCTGCGCTCGCTCGAGG	1	78024009	78024120	AGGACCGGATGGCGTGTGGGGCTGCCGGGTTGCCTTACACTTTTTGCGCTCCTCGTTGGCGGCTGCGCAGGTCTTGGTGTAGAGAGCGCGGGCGGCCTGCAGCTCCTCCTCC	TTCTGCCTGCGCTCGCTCGAGGCTTCAGCTTCCCGATATCCGACGGTAGTGTNNNNNACCCCTGGGAAACCCTCC	78023683	78024102	-	0	1
INF1_smMIP_CCDC40_21	17:78032200-78032351/16,24/-	0.677751	17	78032336	78032351	GTTCTGCATGTAGAAG	4	78032200	78032223	GAGACCCAGGAGGAAGCAGGGAAC	1	78032224	78032335	AGATGCAGGGCCAAGTTCTCCATCTCAGTCTGCAGAGCCGCCACTGCGGGGCGCGGCGGGGGAGAAAGAGAGAGAGAGTGAGTGGGGAGGCTGTCCCAGCGTCCCCCATGCA	GAGACCCAGGAGGAAGCAGGGAACCTTCAGCTTCCCGATATCCGACGGTAGTGTNNNNNGTTCTGCATGTAGAAG	78032271	78032470	-	0	1
INF1_smMIP_CCDC40_22	17:78032283-78032434/16,24/-	0.913056	17	78032419	78032434	ATTTCTGCCCGGATCC	3	78032283	78032306	CTGCAGAGCCGCCACTGCGGGGCG	1	78032307	78032418	TCTCCGTCTCGGCCTTCTTTACCACTTGTGTCATCACGCGGATGTCGTCACGCATGTCCTGGTCGATGTTCTGCATGTAGAAGAGATGCAGGGCCAAGTTCTCCATCTCAGT	CTGCAGAGCCGCCACTGCGGGGCGCTTCAGCTTCCCGATATCCGACGGTAGTGTNNNNNATTTCTGCCCGGATCC	78032271	78032470	-	0	1
INF1_smMIP_CCDC40_23	17:78032354-78032505/21,19/-	0.936899	17	78032485	78032505	TTTTGAAGCTCCACGGTCTGG	1	78032354	78032372	GTCACGCATGTCCTGGTCG	1	78032373	78032484	TGATCATTAAACATGTGTCGAGTTTGCAGAATACCTGCTTTTTCTTCTCGATTTCTGCCCGGATCCTCTCCGTCTCGGCCTTCTTTACCACTTGTGTCATCACGCGGATGTC	GTCACGCATGTCCTGGTCGCTTCAGCTTCCCGATATCCGACGGTAGTGTNNNNNTTTTGAAGCTCCACGGTCTGG	78032271	78032470	-	0	1
INF1_smMIP_CCDC40_24	17:78032587-78032738/17,23/+	0.78191	17	78032587	78032603	GGGTTGGTGGAGAACAG	3	78032716	78032738	GTTTGAGGCTCAGTACTTGGCCC	1	78032604	78032715	GCCCTCAGCCACGGGCACCTCCTGACGGGGCTGCTTCTCATCCTGTTTCCCAGGACCTGTATGTGGACCAGCTCACCACTCGAGCCCAGCAACTGGAAGAAGACATTGCCCT	GTTTGAGGCTCAGTACTTGGCCCCTTCAGCTTCCCGATATCCGACGGTAGTGTNNNNNGGGTTGGTGGAGAACAG	78032635	78032799	+	0	1
INF1_smMIP_CCDC40_25	17:78032684-78032835/17,23/-	0.901643	17	78032819	78032835	GTGCGTGGACACTCACT	1	78032684	78032706	TCTTCTTCCAGTTGCTGGGCTCG	1	78032707	78032818	GGAGGGTCGAACACTGAGAGCTGCGGGGACTGCTTTTACCTCACTCACTGCTTTCCTTAAAATCCGGGTGTCCTCAGCTTGGGCCAAGTACTGAGCCTCAAACAGGGCAATG	TCTTCTTCCAGTTGCTGGGCTCGCTTCAGCTTCCCGATATCCGACGGTAGTGTNNNNNGTGCGTGGACACTCACT	78032635	78032799	-	0	1
INF1_smMIP_CCDC40_26	17:78039209-78039360/16,24/-	0.894792	17	78039345	78039360	ATGCCCACCAGGCTGC	3	78039209	78039232	GCAAAGCCCAAGAACACCAGAGCC	1	78039233	78039344	TGGCCCATTGCTGCATGATGCGCCTCTTCTCCACGCTGATGGCGTCGATCTCGGTGCAGGCCTGCAGCCAACAGGGGAGGGGGCAGGAATGGCTGTCTCATTTCATTTGCGA	GCAAAGCCCAAGAACACCAGAGCCCTTCAGCTTCCCGATATCCGACGGTAGTGTNNNNNATGCCCACCAGGCTGC	78039262	78039425	-	0	1
INF1_smMIP_CCDC40_27	17:78039311-78039462/16,24/+	0.58486	17	78039311	78039326	GTGGAGAAGAGGCGCA	3	78039439	78039462	GGAACCCCAGGGGTCCGTGGCAGG	1	78039327	78039438	TCATGCAGCAATGGGCCAGCAGCCTGGTGGGCATGAAGCACCGCGACGAGGCGCACAGGGCGGTGCTGGAGGCGCTCAGGTACTGCAGGGCCACAGGCAGCGAGGATGTGCG	GGAACCCCAGGGGTCCGTGGCAGGCTTCAGCTTCCCGATATCCGACGGTAGTGTNNNNNGTGGAGAAGAGGCGCA	78039262	78039425	+	0	1
INF1_smMIP_CCDC40_28	17:78055302-78055453/22,18/+	0.912163	17	78055302	78055323	GATGTCTCACACGTAACTGGCT	1	78055436	78055453	GCGAGCATCCTGAACCGG	1	78055324	78055435	CTCCCCGCTGCATTTCTACAGAGGATGCCAGCATCAAGCCAAATCCACCGACGGCGAGATTGAGGCCTATAAGAAATCCATCATGAAGGAGGAAGAAAAGAACGAGAAGCTG	GCGAGCATCCTGAACCGGCTTCAGCTTCCCGATATCCGACGGTAGTGTNNNNNGATGTCTCACACGTAACTGGCT	78055323	78055877	+	0	1
INF1_smMIP_CCDC40_29	17:78055407-78055558/16,24/-	0.857826	17	78055543	78055558	GTCCTGCAGGGTGAGC	2	78055407	78055430	TCTCGTTCTTTTCTTCCTCCTTCA	1	78055431	78055542	CTGTAGGTATTGAACTGGCTCTGCAGGGCCACCTGCTTGGTCAGGCACTGGGTGGTGAGCTTCTGCAGCAGTGTGGCTTCCGTCTCTGTCCGGTTCAGGATGCTCGCCAGCT	TCTCGTTCTTTTCTTCCTCCTTCACTTCAGCTTCCCGATATCCGACGGTAGTGTNNNNNGTCCTGCAGGGTGAGC	78055323	78055877	-	0	1
INF1_smMIP_CCDC40_30	17:78055471-78055622/22,18/-	0.56036	17	78055601	78055622	CCAGGTGTGACCTGTGGGGCGG	1	78055471	78055488	GTGAGCTTCTGCAGCAGT	1	78055489	78055600	GCCCGGCCTCACCAGCTGGTCCTGGCTGAGGGCATCCTCTGTGTCCTGCAGGGTGAGCCTGTAGGTATTGAACTGGCTCTGCAGGGCCACCTGCTTGGTCAGGCACTGGGTG	GTGAGCTTCTGCAGCAGTCTTCAGCTTCCCGATATCCGACGGTAGTGTNNNNNCCAGGTGTGACCTGTGGGGCGG	78055323	78055877	-	0	1
INF1_smMIP_CCDC40_31	17:78055571-78055722/16,24/-	0.537956	17	78055707	78055722	GATGGCTTGGCGGATG	1	78055571	78055594	CCTCACCAGCTGGTCCTGGCTGAG	1	78055595	78055706	GCCTGCAACTCCTCCGTGAGTATCATTTGTTCCTGGAGACAAGGAGCCACAGGGTGCACGTGCCTGAAGAGGCACCACCGTGCGCCAGGTGTGACCTGTGGGGCGGGCCCGG	CCTCACCAGCTGGTCCTGGCTGAGCTTCAGCTTCCCGATATCCGACGGTAGTGTNNNNNGATGGCTTGGCGGATG	78055323	78055877	-	0	1
INF1_smMIP_CCDC40_32	17:78055657-78055808/21,19/-	0.917509	17	78055788	78055808	TTGGTGGTCTTGTTGGAGGTC	1	78055657	78055675	CCTGGAGACAAGGAGCCAC	1	78055676	78055787	ATGTGCTCCTGCAGCTTCTCCCGGATGGCAGCATCCGTCTTCCTCCTGAGCTCCAGCTCGCCCTGGATGGCTTGGCGGATGGCCTGCAACTCCTCCGTGAGTATCATTTGTT	CCTGGAGACAAGGAGCCACCTTCAGCTTCCCGATATCCGACGGTAGTGTNNNNNTTGGTGGTCTTGTTGGAGGTC	78055323	78055877	-	0	1
INF1_smMIP_CCDC40_33	17:78055762-78055913/18,22/-	0.858423	17	78055896	78055913	CATATGCCCAGGCTGCAG	3	78055762	78055783	GCTCCTGCAGCTTCTCCCGGAT	1	78055784	78055895	GGGGCTTCGCACAGCCCCTCCCTGGGGCAGGGGCCTACCATGTTGGTCTTCTCCTTCTGCAGCCTCAGGATGAGCTGGTTGAAGTATTTGGTGGTCTTGTTGGAGGTCATGT	GCTCCTGCAGCTTCTCCCGGATCTTCAGCTTCCCGATATCCGACGGTAGTGTNNNNNCATATGCCCAGGCTGCAG	78055323	78055877	-	0	20
INF1_smMIP_CCDC40_34	17:78058502-78058653/21,19/-	0.911704	17	78058633	78058653	CCTGGTCCAGCTCCACCAGGG	1	78058502	78058520	CCTGTGAATATTGCCCCCA	1	78058521	78058632	TCTTCTGGTGTGCGTCCAGCCTGCTGCTGGTGTGTGTGATGTCCAGGGTGGTCTGGGCAATGTCACCGTTGATTTTGGAAAGATGTGTCATCTGAATTGATGAAAAGAAATA	CCTGTGAATATTGCCCCCACTTCAGCTTCCCGATATCCGACGGTAGTGTNNNNNCCTGGTCCAGCTCCACCAGGG	78058520	78058807	-	0	1
INF1_smMIP_CCDC40_35	17:78058617-78058768/16,24/+	0.866376	17	78058617	78058632	GACGCACACCAGAAGA	1	78058745	78058768	CTTCCTCAACAAGCAGCTGGAGCG	1	78058633	78058744	CCCTGGTGGAGCTGGACCAGGACGTGAAGAAAGTCAACGAGCTCATCACCAACAGCCAGAGCGAGATCTCCCGGCGCACGATCCTGATCGAGAGGAAGCAAGGGCTCATCAA	CTTCCTCAACAAGCAGCTGGAGCGCTTCAGCTTCCCGATATCCGACGGTAGTGTNNNNNGACGCACACCAGAAGA	78058520	78058807	+	0	1
INF1_smMIP_CCDC40_36	17:78058686-78058837/18,22/-	0.775584	17	78058820	78058837	CCAGGCACCACAGTCAGC	2	78058686	78058707	GCCGGGAGATCTCGCTCTGGCT	1	78058708	78058819	CGGGGACCACGTCTCCCTGCCTGGGACCTCACCCCCAGCTCGGAGACCATCCGCTCCAGCTGCTTGTTGAGGAAGTTGATGAGCCCTTGCTTCCTCTCGATCAGGATCGTGC	GCCGGGAGATCTCGCTCTGGCTCTTCAGCTTCCCGATATCCGACGGTAGTGTNNNNNCCAGGCACCACAGTCAGC	78058520	78058807	-	0	1
INF1_smMIP_CCDC40_37	17:78059739-78059890/17,23/-	0.912453	17	78059874	78059890	ACCTGGGCCTGGACCGC	1	78059739	78059761	CGCAGTGACTCACGCCTGTAATT	17	78059762	78059873	CTTGCCATCGTGCTCGTCGATCAGCTTGCTCAGCCTTTTGATTTCAAGCTCCAGGGGCCCCACTTCTTCCCCCTAGACCGGATATTCATCAAAAAGCAAAATTAGGGCTGGG	CGCAGTGACTCACGCCTGTAATTCTTCAGCTTCCCGATATCCGACGGTAGTGTNNNNNACCTGGGCCTGGACCGC	78059780	78060035	-	10	1
INF1_smMIP_CCDC40_38	17:78059829-78059980/16,24/+	0.689403	17	78059829	78059844	GAAATCAAAAGGCTGA	6	78059957	78059980	CCTGGACGCATCCAAGAAGGAGCT	1	78059845	78059956	GCAAGCTGATCGACGAGCACGATGGCAAGGCGGTCCAGGCCCAGGTGACCTGGCTGCGCCTGCAGCAGGAGATGGTCAAGGTGACACAGGAGCAGGAGGAGCAGCTGGCCTC	CCTGGACGCATCCAAGAAGGAGCTCTTCAGCTTCCCGATATCCGACGGTAGTGTNNNNNGAAATCAAAAGGCTGA	78059780	78060035	+	0	1
INF1_smMIP_CCDC40_39	17:78059904-78060055/16,24/-	0.926774	17	78060040	78060055	GTCTCAGCATCACTGC	2	78059904	78059927	CACCTTGACCATCTCCTGCTGCAG	1	78059928	78060039	AGGGCCGGGCACGGCGGCTCTTACTTTCTACTCGTAGTTTCTTCTGCTCCATGATGTGGAGCTCCTTCTTGGATGCGTCCAGGGAGGCCAGCTGCTCCTCCTGCTCCTGTGT	CACCTTGACCATCTCCTGCTGCAGCTTCAGCTTCCCGATATCCGACGGTAGTGTNNNNNGTCTCAGCATCACTGC	78059780	78060035	-	0	1
INF1_smMIP_CCDC40_40	17:78061366-78061517/19,21/+	0.911308	17	78061366	78061384	CTCCTGGGGTCTCTCCCTG	3	78061497	78061517	GAATAAAAACCGGTGCAGCTC	1	78061385	78061496	AGTCTCTGTTTTCTGCCATAGGCAAGATTGAGCAGGAGAAGAAGGAGCAGAAGGAGATCGAGCACCACATGAAGGACCTGGACAACGACCTGAAGAAGCTCAACATGTTGAT	GAATAAAAACCGGTGCAGCTCCTTCAGCTTCCCGATATCCGACGGTAGTGTNNNNNCTCCTGGGGTCTCTCCCTG	78061384	78061595	+	0	1
INF1_smMIP_CCDC40_41	17:78061472-78061623/17,23/+	0.860817	17	78061472	78061488	ACCTGAAGAAGCTCAAC	1	78061601	78061623	GGGCTCAGGACGATGGAGGGCGG	1	78061489	78061600	ATGTTGATGAATAAAAACCGGTGCAGCTCGGAGGAGCTGGAGCAGAACAACCGGGTGACAGAGAATGAGTTCGTGCGCTCGCTGAAGGTCCGGCCGTGTCCACGCAGTCCCG	GGGCTCAGGACGATGGAGGGCGGCTTCAGCTTCCCGATATCCGACGGTAGTGTNNNNNACCTGAAGAAGCTCAAC	78061384	78061595	+	0	1
INF1_smMIP_CCDC40_41b	17:78061472-78061623/17,23/+	0.860817	17	78061472	78061488	ACCTGAAGAAGCTCAAC	1	78061601	78061623	GGGCTCAGGATGATGGAGGGCGG	1	78061489	78061600	ATGTTGATGAATAAAAACCGGTGCAGCTCGGAGGAGCTGGAGCAGAACAACCGGGTGACAGAGAATGAGTTCGTGCGCTCGCTGAAGGTCCGGCCGTGTCCACGCAGTCCCG	GGGCTCAGGATGATGGAGGGCGGCTTCAGCTTCCCGATATCCGACGGTAGTGTNNNNNACCTGAAGAAGCTCAAC	78061384	78061595	+	0	1
INF1_smMIP_CCDC40_42	17:78061486-78061637/16,24/-	0.79551	17	78061622	78061637	CAAGGACCGTACCCCC	1	78061486	78061509	CCGGTTTTTATTCATCAACATGTT	1	78061510	78061621	GCCCTCCATCGTCCTGAGCCCCGGGACTGCGTGGACACGGCCGGACCTTCAGCGAGCGCACGAACTCATTCTCTGTCACCCGGTTGTTCTGCTCCAGCTCCTCCGAGCTGCA	CCGGTTTTTATTCATCAACATGTTCTTCAGCTTCCCGATATCCGACGGTAGTGTNNNNNCAAGGACCGTACCCCC	78061384	78061595	-	0	1
INF1_smMIP_CCDC40_43	17:78061765-78061916/16,24/-	0.683705	17	78061901	78061916	GAGACTGGGACTCACT	16	78061765	78061788	ACAGCTGTGGGGAGGGCCATGGGA	1	78061789	78061900	CTGCTTCCACCAGTTGATTCAGGAGGGTCGCCTTCTCCTCGCTGAGCTGGTTCAGCTTGTCCTGCATCTTGATGGTCTCCCTCTCAGAGGCCTGCATGGGGGAGGGGGCGGG	ACAGCTGTGGGGAGGGCCATGGGACTTCAGCTTCCCGATATCCGACGGTAGTGTNNNNNGAGACTGGGACTCACT	78061788	78061921	-	0	20
INF1_smMIP_CCDC40_44	17:78061809-78061960/16,24/-	0.860038	17	78061945	78061960	AGAGGCCTGTAGGTGC	2	78061809	78061832	TTGATGGTCTCCCTCTCAGAGGCC	1	78061833	78061944	AGTGACCTTCATGACCCACGTGTGGCTGGAGACTGGGACTCACTCTGCTTCCACCAGTTGATTCAGGAGGGTCGCCTTCTCCTCGCTGAGCTGGTTCAGCTTGTCCTGCATC	TTGATGGTCTCCCTCTCAGAGGCCCTTCAGCTTCCCGATATCCGACGGTAGTGTNNNNNAGAGGCCTGTAGGTGC	78061788	78061921	-	0	1
INF1_smMIP_CCDC40_45	17:78063483-78063634/21,19/+	0.917214	17	78063483	78063503	GTAAAGCCTTAGAGTGTGAGC	1	78063616	78063634	CCTCAGTGGATTCCGAGAT	1	78063504	78063615	TCACCGAAGCATCAGAAGAAAACTCCTAATTTCTTACACTGCCTCTCCTACCTCTAAAGACACCAGATTATGCTTTGGGAGAAAAAAATCCAACTGGCAAAAGAGATGCGTT	CCTCAGTGGATTCCGAGATCTTCAGCTTCCCGATATCCGACGGTAGTGTNNNNNGTAAAGCCTTAGAGTGTGAGC	78063541	78063703	+	0	1
INF1_smMIP_CCDC40_46	17:78063575-78063726/16,24/-	0.862347	17	78063711	78063726	CTGGCACCCAGCAGGC	18	78063575	78063598	AGTTGGATTTTTTTCTCCCAAAGC	1	78063599	78063710	CCTGCCACGCCGCTCTCCTCCCCTCACCTTCATCCTGTGGATCTCGCCCTTCATGGCCCGGATCTCCGTCTGGCCGATCTCGGAATCCACTGAGGAACGCATCTCTTTTGCC	AGTTGGATTTTTTTCTCCCAAAGCCTTCAGCTTCCCGATATCCGACGGTAGTGTNNNNNCTGGCACCCAGCAGGC	78063541	78063703	-	0	1
INF1_smMIP_CCDC40_47	17:78063844-78063995/16,24/+	0.801732	17	78063844	78063859	CTCCAGCAGAGTGACC	7	78063972	78063995	ACGTGCACGAACAACACGGGACGC	4	78063860	78063971	TGCACTCCAGCCGAGCACTGGCAAAGCGCACGTCCCCCTTGACCCAGCTTTTACCACACGCTTGCTTTTAATGTGCAGAAATATTGCAGAACAACACAGGACGCACACAGGC	ACGTGCACGAACAACACGGGACGCCTTCAGCTTCCCGATATCCGACGGTAGTGTNNNNNCTCCAGCAGAGTGACC	78063916	78064218	+	0	1
INF1_smMIP_CCDC40_48	17:78063901-78064052/20,20/+	0.897072	17	78063901	78063920	ACCCAGCTTTTACCACACGC	1	78064033	78064052	GGCACGTGCACGAACAACAC	4	78063921	78064032	TTGCTTTTAATGTGCAGAAATATTGCAGAACAACACAGGACGCACACAGGCACGTGCACGAACAACACGGGACGCACGCAGGCACGTGCACGAAGAACACGGGACGCGCGCA	GGCACGTGCACGAACAACACCTTCAGCTTCCCGATATCCGACGGTAGTGTNNNNNACCCAGCTTTTACCACACGC	78063916	78064218	+	0	1
INF1_smMIP_CCDC40_48b	17:78063901-78064052/20,20/+	0.897072	17	78063901	78063920	ACCCAGCTTTTACCACACGC	1	78064033	78064052	GGCACGTGCACGAACAACAT	4	78063921	78064032	TTGCTTTTAATGTGCAGAAATATTGCAGAACAACACAGGACGCACACAGGCACGTGCACGAACAACACGGGACGCACGCAGGCACGTGCACGAAGAACACGGGACGCGCGCA	GGCACGTGCACGAACAACATCTTCAGCTTCCCGATATCCGACGGTAGTGTNNNNNACCCAGCTTTTACCACACGC	78063916	78064218	+	0	1
INF1_smMIP_CCDC40_49	17:78063974-78064125/18,22/-	0.596631	17	78064108	78064125	GCGCGTCCCGTGTTGTTC	3	78063974	78063995	GCGTCCCGTGTTGTTCGTGCAC	4	78063996	78064107	GTGCACGTGCCTGCGCGCGTCCCGTGTTGTTCGTGCACGTGCCCGCGCGCGTCCCGTGTTGTTCGTGCACGTGCCTGCGCGCGTCCCGTGTTCTTCGTGCACGTGCCTGCGT	GCGTCCCGTGTTGTTCGTGCACCTTCAGCTTCCCGATATCCGACGGTAGTGTNNNNNGCGCGTCCCGTGTTGTTC	78063916	78064218	-	0	20
INF1_smMIP_CCDC40_50	17:78064057-78064208/16,24/-	0.782135	17	78064193	78064208	CCTGTGTTGTTCATGC	5	78064057	78064080	TGTTCGTGCACGTGCCCGCGCGCG	1	78064081	78064192	ACGTGCTGTGTGTGTCCTGTGTTCGTGCACGTGCCTGCGCGCGTCCCTTGTTCGTGCACGTGCCTGCGCGCGTCCCGTGTTGTTCGTGCACGTGCCTGCGCGCGTCCCGTGT	TGTTCGTGCACGTGCCCGCGCGCGCTTCAGCTTCCCGATATCCGACGGTAGTGTNNNNNCCTGTGTTGTTCATGC	78063916	78064218	-	0	1
INF1_smMIP_CCDC40_50b	17:78064057-78064208/16,24/-	0.782135	17	78064193	78064208	CCTGTGTTGTTCATGC	5	78064057	78064080	TGTTCGTGCACGTGCCTGCGCGCG	1	78064081	78064192	ACGTGCTGTGTGTGTCCTGTGTTCGTGCACGTGCCTGCGCGCGTCCCTTGTTCGTGCACGTGCCTGCGCGCGTCCCGTGTTGTTCGTGCACGTGCCTGCGCGCGTCCCGTGT	TGTTCGTGCACGTGCCTGCGCGCGCTTCAGCTTCCCGATATCCGACGGTAGTGTNNNNNCCTGTGTTGTTCATGC	78063916	78064218	-	0	1
INF1_smMIP_CCDC40_51b	17:78064093-78064244/16,24/+	0.716884	17	78064093	78064108	CGCAGGCACGTGCACG	5	78064221	78064244	CGTGCATGAACAACACAGAACACA	3	78064109	78064220	AACAACACGGGACGCGCGCAGGCACGTGCACGAACAAGGGACGCGCGCAGGCACGTGCACGAACACAGGACACACACAGCACGTGCATGAACAACACAGGACACACACAGCA	CGTGCATGAACAACACAGAACACACTTCAGCTTCCCGATATCCGACGGTAGTGTNNNNNCGCAGGCACGTGCACG	78063916	78064218	+	0	10
INF1_smMIP_CCDC40_51	17:78064093-78064244/16,24/+	0.716884	17	78064093	78064108	CGCAGGCACGTGCACG	5	78064221	78064244	CGTGCATGAACAACACAGGACACA	3	78064109	78064220	AACAACACGGGACGCGCGCAGGCACGTGCACGAACAAGGGACGCGCGCAGGCACGTGCACGAACACAGGACACACACAGCACGTGCATGAACAACACAGGACACACACAGCA	CGTGCATGAACAACACAGGACACACTTCAGCTTCCCGATATCCGACGGTAGTGTNNNNNCGCAGGCACGTGCACG	78063916	78064218	+	0	10
INF1_smMIP_CCDC40_52	17:78064120-78064271/17,23/+	0.713479	17	78064120	78064136	ACGCGCGCAGGCACGTG	4	78064249	78064271	AGCACGTGCATGAACAACACAGG	3	78064137	78064248	CACGAACAAGGGACGCGCGCAGGCACGTGCACGAACACAGGACACACACAGCACGTGCATGAACAACACAGGACACACACAGCACGTGCATGAACAACACAGGACACACACA	AGCACGTGCATGAACAACACAGGCTTCAGCTTCCCGATATCCGACGGTAGTGTNNNNNACGCGCGCAGGCACGTG	78063916	78064218	+	0	1
INF1_smMIP_CCDC40_53	17:78068994-78069145/16,24/-	0.638975	17	78069130	78069145	GGTGACGGTCTCTCTG	2	78068994	78069017	TGCAGCTGCAGAGAGAGTGGCCGG	1	78069018	78069129	CGGGCAACCGCCAACTCCATGGCACGGATCATCTTCTCCTGCTGCTTCAGCAGCTGCCCGAGCCTGACCTGGGAGACAGGACAGAGGGGCTGGGGCTGGGGCAGGCCTGAGC	TGCAGCTGCAGAGAGAGTGGCCGGCTTCAGCTTCCCGATATCCGACGGTAGTGTNNNNNGGTGACGGTCTCTCTG	78069040	78069270	-	0	20
INF1_smMIP_CCDC40_54	17:78069102-78069253/16,24/-	0.799238	17	78069238	78069253	TACCTTGCGAACGTCC	1	78069102	78069125	CAACCGCCAACTCCATGGCACGGA	1	78069126	78069237	CTGATTTTCCGGCGCAGCTCAAGCTGCTTGTGGTGGAAGTCGGTGCGGGTGAGCGCCTTCCTGTCCATCTTGCGCTGCCCCTCGGCCTGGGTGGTGACGGTCTCTCTGCGGG	CAACCGCCAACTCCATGGCACGGACTTCAGCTTCCCGATATCCGACGGTAGTGTNNNNNTACCTTGCGAACGTCC	78069040	78069270	-	0	1
INF1_smMIP_CCDC40_55	17:78069192-78069343/17,23/-	0.884289	17	78069327	78069343	CTCACCCCGGACCCAGC	2	78069192	78069214	CTGCTTGTGGTGGAAGTCGGTGC	1	78069215	78069326	AAGACGCCTTCCTGGAGTGTTCCTTGAATCCCAGAGAGAGGAGCAGGCGCCCTGTTTCCTTTCCGCTGCTCCCTACCTTGCGAACGTCCCTGATTTTCCGGCGCAGCTCAAG	CTGCTTGTGGTGGAAGTCGGTGCCTTCAGCTTCCCGATATCCGACGGTAGTGTNNNNNCTCACCCCGGACCCAGC	78069040	78069270	-	0	1
INF1_smMIP_CCDC40_56	17:78070977-78071128/16,24/+	0.90815	17	78070977	78070992	CTGACTCTTCCCTGTC	5	78071105	78071128	GCTCCCTCCTAGAGAAGCAGGAAA	1	78070993	78071104	CGCCAAGTAGCCGGGCTGCAGGGGCCCAGCATGGTCCTGTGATTCTCCTAGGCCACCGATGAGTGCACCAAAACCGTCCTGGAACTGGAAGAAACACAAAGAAATGTGAGCA	GCTCCCTCCTAGAGAAGCAGGAAACTTCAGCTTCCCGATATCCGACGGTAGTGTNNNNNCTGACTCTTCCCTGTC	78071022	78071222	+	0	1
INF1_smMIP_CCDC40_57b	17:78071053-78071204/16,24/+	0.897527	17	78071053	78071068	GAGTGCACCAAAACCA	1	78071181	78071204	GCTTGGGGCCCTCAAACGACAGGT	1	78071069	78071180	TCCTGGAACTGGAAGAAACACAAAGAAATGTGAGCAGCTCCCTCCTAGAGAAGCAGGAAAAGCTGTCGGTGATTCAGGCAGACTTCGACACACTCGAGGCCGACCTCACCCG	GCTTGGGGCCCTCAAACGACAGGTCTTCAGCTTCCCGATATCCGACGGTAGTGTNNNNNGAGTGCACCAAAACCA	78071022	78071222	+	0	1
INF1_smMIP_CCDC40_57	17:78071053-78071204/16,24/+	0.897527	17	78071053	78071068	GAGTGCACCAAAACCG	1	78071181	78071204	GCTTGGGGCCCTCAAACGACAGGT	1	78071069	78071180	TCCTGGAACTGGAAGAAACACAAAGAAATGTGAGCAGCTCCCTCCTAGAGAAGCAGGAAAAGCTGTCGGTGATTCAGGCAGACTTCGACACACTCGAGGCCGACCTCACCCG	GCTTGGGGCCCTCAAACGACAGGTCTTCAGCTTCCCGATATCCGACGGTAGTGTNNNNNGAGTGCACCAAAACCG	78071022	78071222	+	0	1
INF1_smMIP_CCDC40_58	17:78071116-78071267/18,22/-	0.721462	17	78071250	78071267	GGACCTCTGTGTGAGTGG	1	78071116	78071137	CCGACAGCTTTTCCTGCTTCTC	1	78071138	78071249	CATGTTCCATGGCCGTCATCCCCAGGGACCTCCTGGGACACGTTTACCTGTCGTTTGAGGGCCCCAAGCCGGGTGAGGTCGGCCTCGAGTGTGTCGAAGTCTGCCTGAATCA	CCGACAGCTTTTCCTGCTTCTCCTTCAGCTTCCCGATATCCGACGGTAGTGTNNNNNGGACCTCTGTGTGAGTGG	78071022	78071222	-	0	1
INF1_smMIP_CCDC40_59	17:78073272-78073423/21,19/+	0.920337	17	78073272	78073292	GGTGTCTTTCTTCTGGTTTGC	1	78073405	78073423	TCCGCTCCAAGCAGTCCCT	1	78073293	78073404	ATAGCCCTATATGGAGTCTCTTTTCCTACCCAGAACCTTTCAGAGATCGTGGCCCTGCAGACACGCCTTAAGCACCTGCAGGCTGTGAAGGAGGGGCGCTACGTGTTCCTGT	TCCGCTCCAAGCAGTCCCTCTTCAGCTTCCCGATATCCGACGGTAGTGTNNNNNGGTGTCTTTCTTCTGGTTTGC	78073304	78073594	+	0	1
INF1_smMIP_CCDC40_60	17:78073370-78073521/17,23/-	0.621087	17	78073505	78073521	GCAGGGCCTCCTGGAAC	2	78073370	78073392	AGCGCCCCTCCTTCACAGCCTGC	1	78073393	78073504	TGGGGGTACTCGTCCCGCACGCGGTCCAGGATGGTGGCGATGAGAGCCAGTCGCTTGTCCAGGCGCTGGCGCTCCAGCACTAGGGACTGCTTGGAGCGGAACAGGAACACGT	AGCGCCCCTCCTTCACAGCCTGCCTTCAGCTTCCCGATATCCGACGGTAGTGTNNNNNGCAGGGCCTCCTGGAAC	78073304	78073594	-	0	20
INF1_smMIP_CCDC40_61	17:78073460-78073611/22,18/-	0.606369	17	78073590	78073611	TCCTGGAGGCCTTGCAAGGCGG	1	78073460	78073477	AGGATGGTGGCGATGAGA	1	78073478	78073589	AGTCCAGGCTGCTCCCTAGGAGGGCCCTGGTGACTCGAGCTTGTTGGCGATCATCTGGCTGACCTTGTGCAGGGCCTCCTGGAACTGGGGGTACTCGTCCCGCACGCGGTCC	AGGATGGTGGCGATGAGACTTCAGCTTCCCGATATCCGACGGTAGTGTNNNNNTCCTGGAGGCCTTGCAAGGCGG	78073304	78073594	-	0	1
INF1_smMIP_CCDC40_62	17:78073570-78073721/21,19/-	0.905847	17	78073701	78073721	GGGTGGGGCTGGCTTATTTCT	1	78073570	78073588	GTCCAGGCTGCTCCCTAGG	1	78073589	78073700	CTTAAACGATGCCCTTCTGAGGGTACATGTGGTTTTTAGGAACACAAAAGATTCCAAGTCCCTCATGACAAACACAATTCCGGATCTCTTCCTGGAGGCCTTGCAAGGCGGA	GTCCAGGCTGCTCCCTAGGCTTCAGCTTCCCGATATCCGACGGTAGTGTNNNNNGGGTGGGGCTGGCTTATTTCT	78073304	78073594	-	0	1
INF1_smMIP_AURKC_1	19:57742433-57742584/19,21/-	0.654	19	57742566	57742584	TGAACCCTCTGGATGGCTG	1	57742433	57742453	ATCCGCGGCGTCGTGAGCAGC	1	57742454	57742565	TTCCCGTTCACAGGGTCCTGAAAGGGGTGGGGGGTCACTTTCTGGCCGGGGCGCTTCCAATCCTGCTCGTCCTGCAGCCTCACTGATGTCTCACTGCTACACAGGCTTCGGG	ATCCGCGGCGTCGTGAGCAGCCTTCAGCTTCCCGATATCCGACGGTAGTGTNNNNNTGAACCCTCTGGATGGCTG	57742460	57742502	-	0	1
INF1_smMIP_AURKC_2	19:57742576-57742727/18,22/+	0.775445	19	57742576	57742593	GAGGGTTCAGGAAGGCGT	1	57742706	57742727	GAAGGCTGGGGACTGGGCCAGG	1	57742594	57742705	CCGCGCCCTCACCTCTTCTCCCCATGAGCTCCCCCAGAGCTGTGGTGCAGCTGGGCAAAGCTCAACCTGCAGGCGAAGAGTGTGAGAGCCAGCGCCAGAGAAAGGACGCAGG	GAAGGCTGGGGACTGGGCCAGGCTTCAGCTTCCCGATATCCGACGGTAGTGTNNNNNGAGGGTTCAGGAAGGCGT	57742595	57742694	+	0	20
INF1_smMIP_AURKC_3	19:57743073-57743224/16,24/+	0.789728	19	57743073	57743088	TCTCCCTTCCTATCTC	10	57743201	57743224	CGTGGGGATGAAGAACAGACTGGG	1	57743089	57743200	CCTCCTCCTCCTCTCTTTCAGTGGCTACAGCAAACCAAACAGCCCAGCAGCCCAGCAGCCCAGCCATGTGAGTCCCTTGGGATTGGTATCTGGAAAAGGAAGGAAGGTGGGA	CGTGGGGATGAAGAACAGACTGGGCTTCAGCTTCCCGATATCCGACGGTAGTGTNNNNNTCTCCCTTCCTATCTC	57743088	57743175	+	0	10
INF1_smMIP_AURKC_4	19:57743354-57743505/16,24/-	0.883579	19	57743490	57743505	GCCACAATGAAATGGC	2	57743354	57743377	CCTCAGCTTGGGAGGTAGGGTAGG	1	57743378	57743489	TTTCCTTGAGCCGAGCCAGGTACACATTCCCAAATTTCCCCTTGCCCAGGGGACGCCCGATTTCAAAGTCATCGACTGTGAGGCGCCGCCTGACAGGAGAGGAAGAAAAAAG	CCTCAGCTTGGGAGGTAGGGTAGGCTTCAGCTTCCCGATATCCGACGGTAGTGTNNNNNGCCACAATGAAATGGC	57743379	57743612	-	0	1
INF1_smMIP_AURKC_5	19:57743464-57743615/21,19/+	0.913491	19	57743464	57743484	TGTGTACCTGGCTCGGCTCAA	1	57743597	57743615	GGACAGTCTCTGCTTCCTC	1	57743485	57743596	GGAAAGCCATTTCATTGTGGCCCTGAAGGTTCTCTTCAAGTCGCAGATAGAGAAGGAAGGACTGGAGCACCAGCTGCGCCGGGAAATTGAGATCCAGGCTCATCTACAGTAA	GGACAGTCTCTGCTTCCTCCTTCAGCTTCCCGATATCCGACGGTAGTGTNNNNNTGTGTACCTGGCTCGGCTCAA	57743379	57743612	+	0	1
INF1_smMIP_AURKC_6	19:57743490-57743641/19,21/+	0.90999	19	57743490	57743508	GCCATTTCATTGTGGCCCT	1	57743621	57743641	TCTTTGACGTCTGAGCCCAGC	1	57743509	57743620	GAAGGTTCTCTTCAAGTCGCAGATAGAGAAGGAAGGACTGGAGCACCAGCTGCGCCGGGAAATTGAGATCCAGGCTCATCTACAGTAAGGACAGTCTCTGCTTCCTCTTTCA	TCTTTGACGTCTGAGCCCAGCCTTCAGCTTCCCGATATCCGACGGTAGTGTNNNNNGCCATTTCATTGTGGCCCT	57743379	57743612	+	0	1
INF1_smMIP_AURKC_7	19:57743850-57744001/21,19/+	0.9126	19	57743850	57743870	GGTGGCATCATATGATAGGCC	1	57743983	57744001	CCAAGGGGTGAGCTCTACA	1	57743871	57743982	TCAGGGAGAAATCTGACTCTTCCAACATTAATCCTTCAGACACCCCAATATCCTGCGCCTGTATAACTATTTCCATGATGCACGCCGGGTGTACCTGATTCTGGAATATGCT	CCAAGGGGTGAGCTCTACACTTCAGCTTCCCGATATCCGACGGTAGTGTNNNNNGGTGGCATCATATGATAGGCC	57743888	57744068	+	0	1
INF1_smMIP_AURKC_8	19:57743936-57744087/16,24/-	0.901896	19	57744072	57744087	AAACTCAGAGACCCCA	4	57743936	57743959	CCCGGCGTGCATCATGGAAATAGT	1	57743960	57744071	GAGCCTCCAGACCCGCACCTCACCGTGGCTGTGCGCTGTTCATCTAATTTCTCGCTTTTCTGCAGCTCCTTGTAGAGCTCACCCCTTGGAGCATATTCCAGAATCAGGTACA	CCCGGCGTGCATCATGGAAATAGTCTTCAGCTTCCCGATATCCGACGGTAGTGTNNNNNAAACTCAGAGACCCCA	57743888	57744068	-	0	1
INF1_smMIP_AURKC_9	19:57744789-57744940/18,22/+	0.904766	19	57744789	57744806	AGGCTTCACTTCCAGGGT	1	57744919	57744940	TCAGGGGTGAGGTGAAGATTGC	1	57744807	57744918	GACTTTTCTTTGCACCCACAGATAATAGAGGAGTTGGCAGATGCCCTGACCTACTGCCATGACAAGAAAGTGATTCACAGAGATATTAAGCCAGAGAACCTGCTGCTGGGGT	TCAGGGGTGAGGTGAAGATTGCCTTCAGCTTCCCGATATCCGACGGTAGTGTNNNNNAGGCTTCACTTCCAGGGT	57744806	57744996	+	0	1
INF1_smMIP_AURKC_10	19:57744865-57745016/19,21/-	0.829653	19	57744998	57745016	TGGTACTCAGAACTCACCC	1	57744865	57744885	TGTGAATCACTTTCTTGTCAT	1	57744886	57744997	TACCACCACCACCTGACCTACCTCAGGGAGGGGGTGTGCACAGACCAGCCAAAATCTGCAATCTTCACCTCACCCCTGAACCCCAGCAGCAGGTTCTCTGGCTTAATATCTC	TGTGAATCACTTTCTTGTCATCTTCAGCTTCCCGATATCCGACGGTAGTGTNNNNNTGGTACTCAGAACTCACCC	57744806	57744996	-	0	1
INF1_smMIP_AURKC_11	19:57746210-57746361/18,22/+	0.900402	19	57746210	57746227	GGCCTCTGCTTAGTACTT	1	57746340	57746361	ATTGGAGTGCTCTGCTATGAGC	1	57746228	57746339	ATTCCCTTTTCTGCCTTCCTCTAGGAGGAAGACAATGTGTGGGACACTGGACTACTTGCCGCCAGAAATGATTGAGGGGAGAACATATGATGAAAAGGTGGATTTGTGGTGC	ATTGGAGTGCTCTGCTATGAGCCTTCAGCTTCCCGATATCCGACGGTAGTGTNNNNNGGCCTCTGCTTAGTACTT	57746230	57746446	+	0	1
INF1_smMIP_AURKC_12	19:57746319-57746470/21,19/+	0.91772	19	57746319	57746339	GAAAAGGTGGATTTGTGGTGC	1	57746452	57746470	ATGGGGGAGCTGGTCAGTG	2	57746340	57746451	ATTGGAGTGCTCTGCTATGAGCTGCTGGTGGGATATCCACCCTTTGAGAGCGCCTCCCACAGTGAGACTTACAGACGCATCCTCAAGGTGGGACAGTCACCTTTGGGCATTC	ATGGGGGAGCTGGTCAGTGCTTCAGCTTCCCGATATCCGACGGTAGTGTNNNNNGAAAAGGTGGATTTGTGGTGC	57746230	57746446	+	0	1
INF1_smMIP_AURKC_13	19:57746552-57746703/22,18/+	0.927075	19	57746552	57746573	GAGGGAGGACATTGATCAAAGA	1	57746686	57746703	GCCCTTGGAGAGACTGCC	1	57746574	57746685	AATTAACCAGACTTCTCTTTCTTCTTTCCTGGCCTCATCAGGTAGATGTGAGGTTTCCACTATCAATGCCTCTGGGGGCCCGGGACTTGATTTCCAGGCTTCTCAGATACCA	GCCCTTGGAGAGACTGCCCTTCAGCTTCCCGATATCCGACGGTAGTGTNNNNNGAGGGAGGACATTGATCAAAGA	57746593	57746805	+	0	1
INF1_smMIP_AURKC_14	19:57746629-57746780/17,23/+	0.672693	19	57746629	57746645	TCCACTATCAATGCCTC	1	57746758	57746780	GCCTCCCTGTGCTCAGATGGCTT	1	57746646	57746757	TGGGGGCCCGGGACTTGATTTCCAGGCTTCTCAGATACCAGCCCTTGGAGAGACTGCCCCTGGCCCAGATCCTGAAGCACCCCTGGGTTCAGGCCCACTCCCGAAGGGTGCT	GCCTCCCTGTGCTCAGATGGCTTCTTCAGCTTCCCGATATCCGACGGTAGTGTNNNNNTCCACTATCAATGCCTC	57746593	57746805	+	0	1
INF1_smMIP_AURKC_15	19:57746665-57746816/16,24/-	0.774664	19	57746801	57746816	CACACACAAAGGGAAC	10	57746665	57746688	GGCTGGTATCTGAGAAGCCTGGAA	1	57746689	57746800	AGAGGCAGACAGGGCTCAGGAAGCCATCTGAGCACAGGGAGGCAGCACCCTTCGGGAGTGGGCCTGAACCCAGGGGTGCTTCAGGATCTGGGCCAGGGGCAGTCTCTCCAAG	GGCTGGTATCTGAGAAGCCTGGAACTTCAGCTTCCCGATATCCGACGGTAGTGTNNNNNCACACACAAAGGGAAC	57746593	57746805	-	0	1
INF1_smMIP_AURKC_16	19:57746748-57746899/16,24/-	0.874887	19	57746884	57746899	GCTTTTATTAATTAGC	2	57746748	57746771	GAGCACAGGGAGGCAGCACCCTTC	1	57746772	57746883	ATCTTACATCTTAAAAGAGAAAAAAATAAAGACAAATGAGGTGGCAGAGCCAGGAGAGCTCCCTGAACACACACAAAGGGAACAGAGGCAGACAGGGCTCAGGAAGCCATCT	GAGCACAGGGAGGCAGCACCCTTCCTTCAGCTTCCCGATATCCGACGGTAGTGTNNNNNGCTTTTATTAATTAGC	57746593	57746805	-	0	1
INF1_smMIP_LHCGR_1	2:48914765-48914916/16,24/+	0.868957	2	48914765	48914780	AATTACTGGTACAGGT	2	48914893	48914916	GGACAACTTCAAGGTGGATTGAGA	1	48914781	48914892	AATTTTTTTTTACAGGTTTAAGAACAATTCAATAATGCAGTTACTGATGTAACAGTTAACACTCTGTGTAGCGAGTCTTGTCTAGGAGAGCTGTACCTTGACAGTGCAATGT	GGACAACTTCAAGGTGGATTGAGACTTCAGCTTCCCGATATCCGACGGTAGTGTNNNNNAATTACTGGTACAGGT	48914814	48916008	+	0	1
INF1_smMIP_LHCGR_2	2:48914864-48915015/17,23/-	0.901202	2	48914999	48915015	TTTGGCTGCTGTAAACG	1	48914864	48914886	CACTGTCAAGGTACAGCTCTCCT	1	48914887	48914998	TCGGGCTGAACTTTATAGAAGGAAAGATTTTTCAGCTTACACCTCCAACTGCAAAAATGGCTTCACTGGATCAAATAAGCCTTCTCAATCCACCTTGAAGTTGTCCACATTG	CACTGTCAAGGTACAGCTCTCCTCTTCAGCTTCCCGATATCCGACGGTAGTGTNNNNNTTTGGCTGCTGTAAACG	48914814	48916008	-	0	1
INF1_smMIP_LHCGR_3	2:48914950-48915101/20,20/-	0.921641	2	48915082	48915101	ATCCCATCAATTCTTGTGCC	1	48914950	48914969	TTTCAGCTTACACCTCCAAC	1	48914970	48915081	AATCCATTTCTGTATGCAATATTCACTAAGACATTCCAAAGAGATTTCTTTCTTTTGCTGAGCAAATTTGGCTGCTGTAAACGTCGGGCTGAACTTTATAGAAGGAAAGATT	TTTCAGCTTACACCTCCAACCTTCAGCTTCCCGATATCCGACGGTAGTGTNNNNNATCCCATCAATTCTTGTGCC	48914814	48916008	-	0	1
INF1_smMIP_LHCGR_4	2:48915044-48915195/17,23/-	0.900213	2	48915179	48915195	TGCATGGCACCTATCTC	1	48915044	48915066	GCAATATTCACTAAGACATTCCA	1	48915067	48915178	TTTTTTTGCCATCTCAGCTGCCTTCAAAGTACCTCTTATCACAGTAACCAACTCTAAAGTTTTACTGGTTCTTTTTTATCCCATCAATTCTTGTGCCAATCCATTTCTGTAT	GCAATATTCACTAAGACATTCCACTTCAGCTTCCCGATATCCGACGGTAGTGTNNNNNTGCATGGCACCTATCTC	48914814	48916008	-	0	1
INF1_smMIP_LHCGR_5b	2:48915117-48915268/16,24/-	0.918553	2	48915253	48915268	AAAATTAATGGCTACC	4	48915117	48915140	TCACAGTAACCAACTCTAAAGTTT	1	48915141	48915252	AATAAAGATACAAAGATTGCTAAGAAAATGGCAATCCTCATCTTCACCGATTTCACCTGCATGGCACCTATCTCTTTTTTTGCCATCTCAGCTGCCTTCAAAGTACCTCTTA	TCACAGTAACCAACTCTAAAGTTTCTTCAGCTTCCCGATATCCGACGGTAGTGTNNNNNAAAATTAATGGCTACC	48914814	48916008	-	0	1
INF1_smMIP_LHCGR_5	2:48915117-48915268/16,24/-	0.918553	2	48915253	48915268	AGAATTAATGGCTACC	4	48915117	48915140	TCACAGTAACCAACTCTAAAGTTT	1	48915141	48915252	AATAAAGATACAAAGATTGCTAAGAAAATGGCAATCCTCATCTTCACCGATTTCACCTGCATGGCACCTATCTCTTTTTTTGCCATCTCAGCTGCCTTCAAAGTACCTCTTA	TCACAGTAACCAACTCTAAAGTTTCTTCAGCTTCCCGATATCCGACGGTAGTGTNNNNNAGAATTAATGGCTACC	48914814	48916008	-	0	1
INF1_smMIP_LHCGR_6	2:48915196-48915347/22,18/+	0.921192	2	48915196	48915217	GGTGAAATCGGTGAAGATGAGG	1	48915330	48915347	CATTGAGAATCAGGATGG	1	48915218	48915329	ATTGCCATTTTCTTAGCAATCTTTGTATCTTTATTGGTAGCCATTAATTCTGGGTTTCGAACTGCAAAATAAATTTTAATGTAGCAAGCACAAATTATGAAGAAGGCCACCA	CATTGAGAATCAGGATGGCTTCAGCTTCCCGATATCCGACGGTAGTGTNNNNNGGTGAAATCGGTGAAGATGAGG	48914814	48916008	+	0	20
INF1_smMIP_LHCGR_7	2:48915294-48915445/19,21/+	0.902769	2	48915294	48915312	TAATGTAGCAAGCACAAAT	1	48915425	48915445	CCGACAAGGGGCAACATAGCA	1	48915313	48915424	TATGAAGAAGGCCACCACATTGAGAATCAGGATGGTTAATATATAGACTTGTGAGAGAGTGGTTTCCACATCCATGGGGAAGCAAATACTGACCTTCATGTAATTGCTGACA	CCGACAAGGGGCAACATAGCACTTCAGCTTCCCGATATCCGACGGTAGTGTNNNNNTAATGTAGCAAGCACAAAT	48914814	48916008	+	0	1
INF1_smMIP_LHCGR_8	2:48915405-48915556/19,21/+	0.907788	2	48915405	48915423	CCTTCATGTAATTGCTGAC	1	48915536	48915556	GTGTGCCATCTTTCTAGAGTG	1	48915424	48915535	ACCGACAAGGGGCAACATAGCAATTAGAGAAGAAAAGAGCCATCCTCCAAGCATAATCAGAATGGCATGTCTTAATCGCAGCTTTTGGTCCAGGTGAATAGCATAGGTGATG	GTGTGCCATCTTTCTAGAGTGCTTCAGCTTCCCGATATCCGACGGTAGTGTNNNNNCCTTCATGTAATTGCTGAC	48914814	48916008	+	0	1
INF1_smMIP_LHCGR_9	2:48915519-48915670/16,24/+	0.911797	2	48915519	48915534	GAATAGCATAGGTGAT	3	48915647	48915670	GCATGGTTATAGTACTGGCCCTTG	1	48915535	48915646	GGTGTGCCATCTTTCTAGAGTGATGACGGTGAGGGTGTAGACAGAAAGTTCACTTGCGAATACAGTGAAAAAGCCAGCAGTGCTGCACCCACTCCCTGTCTGCCAGTCTATG	GCATGGTTATAGTACTGGCCCTTGCTTCAGCTTCCCGATATCCGACGGTAGTGTNNNNNGAATAGCATAGGTGAT	48914814	48916008	+	0	1
INF1_smMIP_LHCGR_10	2:48915628-48915779/16,24/+	0.902084	2	48915628	48915643	CCCTGTCTGCCAGTCT	2	48915756	48915779	GCACTGTAAGTTTGTAACGACTTG	1	48915644	48915755	ATGGCATGGTTATAGTACTGGCCCTTGGTTTGGGAATCAACTGAGGCTATGAGCAGCAGATAGAGCCCCATGCAAAAGTCTGCAAAGGAGAGATTGCACATGAGAAAACGAG	GCACTGTAAGTTTGTAACGACTTGCTTCAGCTTCCCGATATCCGACGGTAGTGTNNNNNCCCTGTCTGCCAGTCT	48914814	48916008	+	0	1
INF1_smMIP_LHCGR_11	2:48915715-48915866/21,19/+	0.91731	2	48915715	48915735	GCAAAAGTCTGCAAAGGAGAG	1	48915848	48915866	CTAAGGAAGTCATAGCCCA	1	48915736	48915847	ATTGCACATGAGAAAACGAGGCACTGTAAGTTTGTAACGACTTGTCAGGAGAACAAAAAGAACAGTCATGTTTCCCATGATGGCTAGAATATTAATCAGCCAAATCAGGACC	CTAAGGAAGTCATAGCCCACTTCAGCTTCCCGATATCCGACGGTAGTGTNNNNNGCAAAAGTCTGCAAAGGAGAG	48914814	48916008	+	0	1
INF1_smMIP_LHCGR_12	2:48915827-48915978/19,21/-	0.921173	2	48915960	48915978	ATGCTTGCTGAGAGTGAAC	1	48915827	48915847	GGTCCTGATTTGGCTGATTAA	1	48915848	48915959	TGAGTGGCTGGGACTATGAATATGGTTTCTGCTTACCCAAGACACCCCGATGTGCTCCTGAACCAGATGCTTTTAATCCCTGTGAAGATATTATGGGCTATGACTTCCTTAG	GGTCCTGATTTGGCTGATTAACTTCAGCTTCCCGATATCCGACGGTAGTGTNNNNNATGCTTGCTGAGAGTGAAC	48914814	48916008	-	0	1
INF1_smMIP_LHCGR_13	2:48915877-48916028/18,22/-	0.899794	2	48916011	48916028	GAGAAAATCCCTTACCTC	1	48915877	48915898	ACCAGATGCTTTTAATCCCTGT	1	48915899	48916010	AAGCCAATAATTCTTCTTACAGTTATTCTTCCATGCTTGCTGAGAGTGAACTGAGTGGCTGGGACTATGAATATGGTTTCTGCTTACCCAAGACACCCCGATGTGCTCCTGA	ACCAGATGCTTTTAATCCCTGTCTTCAGCTTCCCGATATCCGACGGTAGTGTNNNNNGAGAAAATCCCTTACCTC	48914814	48916008	-	0	1
INF1_smMIP_LHCGR_14	2:48921286-48921437/16,24/-	0.448853	2	48921422	48921437	TTTTTCACATTCCATT	14	48921286	48921309	CTTATTATCAGCATCAATTATTTT	1	48921310	48921421	TCTGAAAACTTTTCCAAACAATGTGAAAGCACAGTAAGGAAAGTGAATAACAAAACACTGTAAGTATTTGCATGCAAGGAAACTCAGAAGTCGTATCTTGTTCTGTGTGCAC	CTTATTATCAGCATCAATTATTTTCTTCAGCTTCCCGATATCCGACGGTAGTGTNNNNNTTTTTCACATTCCATT	48921341	48921463	-	0	5
INF1_smMIP_LHCGR_15	2:48921346-48921497/22,18/-	0.888283	2	48921476	48921497	GTTTAGCCTGAAGTCCAAAAGC	1	48921346	48921363	TGTAAGTATTTGCATGCA	2	48921364	48921475	TCAAATGCTTTTTTTAACCTCTTCTCTTTCAGACAGAATTTTTCACATTCCATTTCTGAAAACTTTTCCAAACAATGTGAAAGCACAGTAAGGAAAGTGAATAACAAAACAC	TGTAAGTATTTGCATGCACTTCAGCTTCCCGATATCCGACGGTAGTGTNNNNNGTTTAGCCTGAAGTCCAAAAGC	48921341	48921463	-	0	20
INF1_smMIP_LHCGR_16	2:48925675-48925826/22,18/-	0.940896	2	48925805	48925826	TTGTCAATCTCCTGGAGGCCAC	1	48925675	48925692	AGTCAATGAGTAGACAGC	1	48925693	48925804	GTTGACTTACCCCAGCCACTGCTGTGCTTTTAGAAACTTGCCAACAAAAGAGTAAGTAGAAACCAAAAGGTAAAGCCTACCCAAGCTGTGGCAGAAATTCAGATTTCAAAAT	AGTCAATGAGTAGACAGCCTTCAGCTTCCCGATATCCGACGGTAGTGTNNNNNTTGTCAATCTCCTGGAGGCCAC	48925732	48925959	-	10	1
INF1_smMIP_LHCGR_17	2:48925781-48925932/16,24/-	0.902494	2	48925917	48925932	TCTTCCACCAAATTGC	5	48925781	48925804	GTTGACTTACCCCAGCCACTGCTG	1	48925805	48925916	AGGCCCTGCCGAGCTATGGCCTAGAGTCCATTCAGAGGCTAATTGCCACGTCATCCTATTCTCTAAAAAAATTGCCATCAAGAGAAACATTTGTCAATCTCCTGGAGGCCAC	GTTGACTTACCCCAGCCACTGCTGCTTCAGCTTCCCGATATCCGACGGTAGTGTNNNNNTCTTCCACCAAATTGC	48925732	48925959	-	0	1
INF1_smMIP_LHCGR_18	2:48925834-48925985/16,24/+	0.0964743	2	48925834	48925849	TCTTGATGGCAATTTT	4	48925962	48925985	GCTTTTTATTTATTTATTTTATAC	1	48925850	48925961	TTTAGAGAATAGGATGACGTGGCAATTAGCCTCTGAATGGACTCTAGGCCATAGCTCGGCAGGGCCTGCAATTTGGTGGAAGAAATATCCCTGAACAATAAAGGGGAGAAAT	GCTTTTTATTTATTTATTTTATACCTTCAGCTTCCCGATATCCGACGGTAGTGTNNNNNTCTTGATGGCAATTTT	48925732	48925959	+	0	20
INF1_smMIP_LHCGR_19	2:48935974-48936125/16,24/+	0.899864	2	48935974	48935989	GGTGTAGAGGCTGATG	2	48936102	48936125	GTGGCCCCACGGAAGGCTCCATTG	1	48935990	48936101	TCTCACATATCAGCTTGGGGATGATGTGGAGGGACACCCTAAGCAGTCCTGTTGGGGTACACTGGGCAGGGAGGGGAGGCAGCACCATTCTACTCACAAGGTTTTCGGCCCT	GTGGCCCCACGGAAGGCTCCATTGCTTCAGCTTCCCGATATCCGACGGTAGTGTNNNNNGGTGTAGAGGCTGATG	48936065	48936181	+	0	1
INF1_smMIP_LHCGR_20	2:48936055-48936206/19,21/+	0.913447	2	48936055	48936073	GCAGGGAGGGGAGGCAGCA	2	48936186	48936206	GTGGAGTTTGTACCTCATGTG	1	48936074	48936185	CCATTCTACTCACAAGGTTTTCGGCCCTGTGGCCCCACGGAAGGCTCCATTGTGCATCTTCTCCAGATGTACGTTTTCCTTTAGCTCCCTGTGGGGAAGGATATTGCCCTTA	GTGGAGTTTGTACCTCATGTGCTTCAGCTTCCCGATATCCGACGGTAGTGTNNNNNGCAGGGAGGGGAGGCAGCA	48936065	48936181	+	0	1
INF1_smMIP_LHCGR_21	2:48941047-48941198/16,24/-	0.900673	2	48941183	48941198	TTCAGCAAACTATATG	4	48941047	48941070	CTACAAGATCACATTCAATCTTCA	1	48941071	48941182	GAAATGGATTTGAAGAAGTACAAAGTCATGCATTCAATGGGACGACACTGACTTCACTGTAAGTATTTGCTTATTTCCCCAGCTCAGGAATAAAAATGAAATATTACTCTGG	CTACAAGATCACATTCAATCTTCACTTCAGCTTCCCGATATCCGACGGTAGTGTNNNNNTTCAGCAAACTATATG	48941103	48941213	-	0	1
INF1_smMIP_LHCGR_22	2:48941091-48941242/16,24/+	0.908448	2	48941091	48941106	TATTCCTGAGCTGGGG	3	48941219	48941242	GAATGGGAAGAAACTGAAAGAAAC	1	48941107	48941218	AAATAAGCAAATACTTACAGTGAAGTCAGTGTCGTCCCATTGAATGCATGACTTTGTACTTCTTCAAATCCATTTCCATATAGTTTGCTGAAGGAGGGAGGAGAGGGTTTAG	GAATGGGAAGAAACTGAAAGAAACCTTCAGCTTCCCGATATCCGACGGTAGTGTNNNNNTATTCCTGAGCTGGGG	48941103	48941213	+	0	1
INF1_smMIP_LHCGR_23	2:48950541-48950692/21,19/-	0.908487	2	48950672	48950692	TTCTCATTTCTTTCCTCAAGG	1	48950541	48950559	GCCTCCTGCTAGTCTCACT	1	48950560	48950671	GAAATTTGTGATAACTTACACATAACCACCATACCAGGAAATGCTTTTCAAGGGATGAATAATGAATCTGTAACACTGTGAGTAAACTCCCAGATTTGTGTTCTGCCATACA	GCCTCCTGCTAGTCTCACTCTTCAGCTTCCCGATATCCGACGGTAGTGTNNNNNTTCTCATTTCTTTCCTCAAGG	48950573	48950855	-	0	1
INF1_smMIP_LHCGR_24	2:48950640-48950791/19,21/-	0.904284	2	48950773	48950791	AGGTCTTCTCCTCTGAATC	1	48950640	48950660	TAACTTACACATAACCACCAT	1	48950661	48950772	AAATTTCATTCTGTAAGTACCAGGCTGATTGCTATGCATAACAGTTTCCTATTTGCAGCTAAAATTTAGAAAGTAAATATTTCTCATTTCTTTCCTCAAGGGAAATTTGTGA	TAACTTACACATAACCACCATCTTCAGCTTCCCGATATCCGACGGTAGTGTNNNNNAGGTCTTCTCCTCTGAATC	48950573	48950855	-	0	1
INF1_smMIP_LHCGR_25	2:48950725-48950876/21,19/-	0.956702	2	48950856	48950876	CCCACTCTCTGCCCACACCAC	1	48950725	48950743	TGCTATGCATAACAGTTTC	1	48950744	48950855	TATCCTGTCCCTAATCACAGGAGCATCTGTAACACAGGCATCAGAAAGTTTCCAGATGTTACGAAGGTCTTCTCCTCTGAATCAAATTTCATTCTGTAAGTACCAGGCTGAT	TGCTATGCATAACAGTTTCCTTCAGCTTCCCGATATCCGACGGTAGTGTNNNNNCCCACTCTCTGCCCACACCAC	48950573	48950855	-	0	1
INF1_smMIP_LHCGR_26	2:48952729-48952880/16,24/-	0.851359	2	48952865	48952880	GAACACCAAAAATCTG	5	48952729	48952752	ACAAGGAAAAGGTTGGAAAGATTT	1	48952753	48952864	AGATACATTGAGCCCGGAGCATTTATAAATCTTCCCCGATTAAAATACTTGTGAGAAATTTTCCTTTTTAAGCAATTGGGGAGGGGAAGATGGGCATCTGATGAAAATCAAA	ACAAGGAAAAGGTTGGAAAGATTTCTTCAGCTTCCCGATATCCGACGGTAGTGTNNNNNGAACACCAAAAATCTG	48952793	48952909	-	0	1
INF1_smMIP_LHCGR_27	2:48952830-48952981/16,24/-	0.915474	2	48952966	48952981	CAGCCAGCAACTTCTG	9	48952830	48952853	GCCCGGAGCATTTATAAATCTTCC	1	48952854	48952965	GTGACCATGATCTCACACATTTCAAACAATACACATCTATTAAACAGCAGCTTTTTTTTTCCCTCTCTCTTTACAGACTGATCCAGAACACCAAAAATCTGAGATACATTGA	GCCCGGAGCATTTATAAATCTTCCCTTCAGCTTCCCGATATCCGACGGTAGTGTNNNNNCAGCCAGCAACTTCTG	48952793	48952909	-	0	1
INF1_smMIP_LHCGR_28	2:48956245-48956396/19,21/-	0.915728	2	48956378	48956396	TTCTCTTTTTCCCCCTCCT	2	48956245	48956265	CTGCTGTACACTATTACCCTC	1	48956266	48956377	CTCTTCCCTAGTGAAATCTCTCAGATTGATTCCCTGGAAAGGATAGAAGCTAATGCCTTTGACAACCTCCTCAATTTGTCTGAAATGTAAGCATCAGCTAACAGACAGTTTA	CTGCTGTACACTATTACCCTCCTTCAGCTTCCCGATATCCGACGGTAGTGTNNNNNTTCTCTTTTTCCCCCTCCT	48956270	48956386	-	0	1
INF1_smMIP_LHCGR_29	2:48956300-48956451/20,20/+	0.910069	2	48956300	48956319	CAAATTGAGGAGGTTGTCAA	1	48956432	48956451	ATGAGCTATGTGTGTGACCC	1	48956320	48956431	AGGCATTAGCTTCTATCCTTTCCAGGGAATCAATCTGAGAGATTTCACTAGGGAAGAGAGGAGGGGGAAAAAGAGAAAGAAACATGAAAGAAATGACCGTGTCTGCATGATT	ATGAGCTATGTGTGTGACCCCTTCAGCTTCCCGATATCCGACGGTAGTGTNNNNNCAAATTGAGGAGGTTGTCAA	48956270	48956386	+	0	1
INF1_smMIP_LHCGR_30	2:48958274-48958425/17,23/+	0.821305	2	48958274	48958290	AGAAAAATTATCCCCTT	1	48958403	48958425	ATGGGATCACTTTGACAGGGAGG	1	48958291	48958402	TCAAATGTGTTTTCTCTTAGAAAAAATTCATTATTCCAATTACGAATGTCTTTTGATATGCAGTAACTTACTTACATTTTTATGACCTCATTAAGTCCTCTGAAAGCTTGAG	ATGGGATCACTTTGACAGGGAGGCTTCAGCTTCCCGATATCCGACGGTAGTGTNNNNNAGAAAAATTATCCCCTT	48958344	48958457	+	0	1
INF1_smMIP_LHCGR_31	2:48958379-48958530/19,21/+	0.917112	2	48958379	48958397	CATTAAGTCCTCTGAAAGC	1	48958510	48958530	GGGTATGTGTATGTGTGTGAG	1	48958398	48958509	TTGAGATGGGATCACTTTGACAGGGAGGTAGGCAAGTGATCTAGAAAAGAAAAAAGGAAATCCAAGAGTTTAAGATTTATGATAGGGTGCCTTTTAAGTTCATGAATAAAAT	GGGTATGTGTATGTGTGTGAGCTTCAGCTTCCCGATATCCGACGGTAGTGTNNNNNCATTAAGTCCTCTGAAAGC	48958344	48958457	+	0	1
INF1_smMIP_LHCGR_32	2:48982581-48982732/22,18/-	0.498203	2	48982711	48982732	GAGGCGCTCTGCCCTGAGCCCT	1	48982581	48982598	GCTCTATGCCACCTTCCC	2	48982599	48982710	GCAACTGCGTGCCCGACGGCGCCCTGCGCTGCCCCGGCCCCACGGCCGGTCTCACTCGACTGTGAGTACACAGCGCTCCCGTCGCGGCGCCCTTGATGCAGGACCCTCCATC	GCTCTATGCCACCTTCCCCTTCAGCTTCCCGATATCCGACGGTAGTGTNNNNNGAGGCGCTCTGCCCTGAGCCCT	48982628	48982830	-	0	1
INF1_smMIP_LHCGR_33	2:48982688-48982839/17,23/-	0.421697	2	48982823	48982839	GCAAGCCGCAGAAGCCC	1	48982688	48982710	GCAACTGCGTGCCCGACGGCGCC	1	48982711	48982822	AGTTCGCCGGCCATGAAGCAGCGGTTCTCGGCGCTGCAGCTGCTGAAGCTGCTGCTGCTGCTGCAGCCGCCGCTGCCACGAGCGCTGCGCGAGGCGCTCTGCCCTGAGCCCT	GCAACTGCGTGCCCGACGGCGCCCTTCAGCTTCCCGATATCCGACGGTAGTGTNNNNNGCAAGCCGCAGAAGCCC	48982628	48982830	-	0	1
INF1_smMIP_LHCGR_34	2:48982703-48982854/16,24/+	0.579941	2	48982703	48982718	GCAGTTGCAGGGCTCA	5	48982831	48982854	GCGGCTTGCCAGTGTCTTGGACGG	1	48982719	48982830	GGGCAGAGCGCCTCGCGCAGCGCTCGTGGCAGCGGCGGCTGCAGCAGCAGCAGCAGCTTCAGCAGCTGCAGCGCCGAGAACCGCTGCTTCATGGCCGGCGAACTGGGCTTCT	GCGGCTTGCCAGTGTCTTGGACGGCTTCAGCTTCCCGATATCCGACGGTAGTGTNNNNNGCAGTTGCAGGGCTCA	48982628	48982830	+	0	1
INF1_smMIP_MEI1_1	22:42095492-42095643/22,18/+	0.524023	22	42095492	42095513	GTGCAGTCTGCGCGGGAAAGAG	1	42095626	42095643	TTACCGGCACGACCCGCG	1	42095514	42095625	TGCCGCCTCAGCTGAGGGCAAGCGAGGAGATGGCTGTGAGGCAGGCGGCGACGGCGGGCACTCCCGGGCCCAGGAGAGAGGAAGAGGCGGCGCTTCTATTCGAGAGGGCCCA	TTACCGGCACGACCCGCGCTTCAGCTTCCCGATATCCGACGGTAGTGTNNNNNGTGCAGTCTGCGCGGGAAAGAG	42095521	42095736	+	0	20
INF1_smMIP_MEI1_2	22:42095608-42095759/22,18/-	0.362656	22	42095738	42095759	ATGGCCAAACCCAGGTCTTCTG	1	42095608	42095625	TGGGCCCTCTCGAATAGA	1	42095626	42095737	AAGAAAAGGTTCCGCCCGCACCGACACGCCGGGGTCCGGCAGCAGCTCCAGCGCGCAGGCCAGGCACAGGCGGGGGGTCACGGGCAGCAGCCAGCGCGGGTCGTGCCGGTAA	TGGGCCCTCTCGAATAGACTTCAGCTTCCCGATATCCGACGGTAGTGTNNNNNATGGCCAAACCCAGGTCTTCTG	42095521	42095736	-	0	1
INF1_smMIP_MEI1_3	22:42099277-42099428/17,23/+	0.901241	22	42099277	42099293	GGATTCAGAATAGCCAA	8	42099406	42099428	ACTGGTGTCTCAGGATCAGAGAG	1	42099294	42099405	AATTTGGTTGCTATTGAATGTTTTTCTTCATTTGCTTCAAGTTAGTGCGCAAGAAGCACATGTTGTCCTGCTTCCAAGATGCCCTTGTGAGGCATACCTCCCTGGTCACGCA	ACTGGTGTCTCAGGATCAGAGAGCTTCAGCTTCCCGATATCCGACGGTAGTGTNNNNNGGATTCAGAATAGCCAA	42099313	42099478	+	0	1
INF1_smMIP_MEI1_4	22:42099365-42099516/17,23/-	0.91579	22	42099500	42099516	AAGCAGATATACATACT	3	42099365	42099387	TGCCTCACAAGGGCATCTTGGAA	1	42099388	42099499	ATACATTCAAAACTCATGTCAAATTTCCCTCTTAATCTTACCAAAAAGCACACTTATGAAGTGGATGCAGACTCTCTGATCCTGAGACACCAGTTGCGTGACCAGGGAGGTA	TGCCTCACAAGGGCATCTTGGAACTTCAGCTTCCCGATATCCGACGGTAGTGTNNNNNAAGCAGATATACATACT	42099313	42099478	-	0	1
INF1_smMIP_MEI1_5	22:42101384-42101535/16,24/-	0.860312	22	42101520	42101535	CTCCCATCTTCCATGC	4	42101384	42101407	GGTCAGGAATTCAAGAAAAGCCTG	2	42101408	42101519	TGCATAATAGTCCTTGGAGCAGAGGGAGGTAAGAAAGGGGTGGTTAGGCAGGGCGCGGTGGCACACATCTGTACCCCAGCAATTTGGGAGGCCGAGGTGGCAGATTACCTGA	GGTCAGGAATTCAAGAAAAGCCTGCTTCAGCTTCCCGATATCCGACGGTAGTGTNNNNNCTCCCATCTTCCATGC	42101486	42101578	-	0	1
INF1_smMIP_MEI1_6	22:42101470-42101621/20,20/+	0.906317	22	42101470	42101489	TGCCTAACCACCCCTTTCTT	1	42101602	42101621	AGTCTGAATTGCAGCTCTGG	1	42101490	42101601	ACCTCCCTCTGCTCCAAGGACTATTATGCAGCATGGAAGATGGGAGTGTGACAGACCTCTGTATTGAAGGTAAGTTGAAACCTTGTATCTAGCACTTGAAGATGAAAGTATT	AGTCTGAATTGCAGCTCTGGCTTCAGCTTCCCGATATCCGACGGTAGTGTNNNNNTGCCTAACCACCCCTTTCTT	42101486	42101578	+	0	1
INF1_smMIP_MEI1_7	22:42109963-42110114/22,18/+	0.954555	22	42109963	42109984	TTGGGGGTGCCTCCTGGTTAGT	1	42110097	42110114	GGTTCTTGAGTCTCTCAG	1	42109985	42110096	AATACTGTTGTGTCTGTTCAGTCCTTATTCAGATCACAACGCAGCTGAAGCTGGAGCAGACTATCCGTTGCCTGCTGGATGAGTGCCACAAAGAGGTCAGAAAATAGCTATG	GGTTCTTGAGTCTCTCAGCTTCAGCTTCCCGATATCCGACGGTAGTGTNNNNNTTGGGGGTGCCTCCTGGTTAGT	42109984	42110099	+	0	1
INF1_smMIP_MEI1_8	22:42109988-42110139/16,24/+	0.921444	22	42109988	42110003	ACTGTTGTGTCTGTTC	4	42110116	42110139	ATCCTCAGATGTCAGAGCTGGGTC	1	42110004	42110115	AGTCCTTATTCAGATCACAACGCAGCTGAAGCTGGAGCAGACTATCCGTTGCCTGCTGGATGAGTGCCACAAAGAGGTCAGAAAATAGCTATGGGTTCTTGAGTCTCTCAGA	ATCCTCAGATGTCAGAGCTGGGTCCTTCAGCTTCCCGATATCCGACGGTAGTGTNNNNNACTGTTGTGTCTGTTC	42109984	42110099	+	0	1
INF1_smMIP_MEI1_9	22:42111989-42112140/21,19/-	0.907364	22	42112120	42112140	TACAAGCTCGTCTGCCAGAGC	1	42111989	42112007	ATCAGGACAGATCTTCCAC	1	42112008	42112119	AGGGATGGCATCCACCAACTTGCCAAGAAGGGTCAGGGTGGCCAGGCTGCCTCGCATGGAGGGCATGTTACACAGCTACAGAAAGTGAATATGCTCCATTCTGTCAATTAGG	ATCAGGACAGATCTTCCACCTTCAGCTTCCCGATATCCGACGGTAGTGTNNNNNTACAAGCTCGTCTGCCAGAGC	42112023	42112170	-	0	1
INF1_smMIP_MEI1_10	22:42112080-42112231/16,24/+	0.900672	22	42112080	42112095	CACCCTGACCCTTCTT	4	42112208	42112231	CATTTGGGTGTCCCATTCACTCTG	1	42112096	42112207	GGCAAGTTGGTGGATGCCATCCCTGCTCTGGCAGACGAGCTTGTAATGGAGCATGGTGAGTGACCTGTGGGAGGAGCTGCCACTACCCTTTTACCTGCTTTTATCATACTGC	CATTTGGGTGTCCCATTCACTCTGCTTCAGCTTCCCGATATCCGACGGTAGTGTNNNNNCACCCTGACCCTTCTT	42112023	42112170	+	0	1
INF1_smMIP_MEI1_11	22:42114035-42114186/18,22/+	0.90045	22	42114035	42114052	TGTGAAATTTCCCTTGGC	2	42114165	42114186	CCTCACCAGTGGCAGCTGAGAT	1	42114053	42114164	TCCTTGGTTGTTTTCTGGACAGGCAACCTGATGGAGCATCTGTTGAGAGGCTTAGTATACCCCAGTGAGGGCATACAAGCTTCTGTCTGTTACCTTTATGGGAAGCTATACT	CCTCACCAGTGGCAGCTGAGATCTTCAGCTTCCCGATATCCGACGGTAGTGTNNNNNTGTGAAATTTCCCTTGGC	42114053	42114298	+	0	1
INF1_smMIP_MEI1_12	22:42114126-42114277/19,21/-	0.904565	22	42114259	42114277	CAAGCAGTTAATCTGCAGC	1	42114126	42114146	GGTAACAGACAGAAGCTTGTA	1	42114147	42114258	TCCTTTGTCTGGGCACCATCCAGGATGGAAAGGAAGAGGGGAAAAAGCTTCTCACGGAAGTGTCCTGAAAGCATCTCAGCTGCCACTGGTGAGGAGTATAGCTTCCCATAAA	GGTAACAGACAGAAGCTTGTACTTCAGCTTCCCGATATCCGACGGTAGTGTNNNNNCAAGCAGTTAATCTGCAGC	42114053	42114298	-	0	1
INF1_smMIP_MEI1_13	22:42114199-42114350/17,23/+	0.906342	22	42114199	42114215	CTTCCGTGAGAAGCTTT	1	42114328	42114350	GCTAGAAGACTTGAGATATTGGG	1	42114216	42114327	TTCCCCTCTTCCTTTCCATCCTGGATGGTGCCCAGACAAAGGAGCTGCAGATTAACTGCTTGGGTAAGACATGAGGCTGGAGAAAAAAGGGAGAATAAGTTTTTGACATTTT	GCTAGAAGACTTGAGATATTGGGCTTCAGCTTCCCGATATCCGACGGTAGTGTNNNNNCTTCCGTGAGAAGCTTT	42114053	42114298	+	0	1
INF1_smMIP_MEI1_14	22:42119910-42120061/16,24/+	0.929847	22	42119910	42119925	TCCTCTTGCCTTACTT	4	42120038	42120061	GTCATCAGGAAATACCTCACTGCC	1	42119926	42120037	CCCAATCCCTTTGTTTCCTAGGTTTGCTGAGGCAGCTGTTGAAGTATGATCTCTTTGTGTCCATGATCATGAACCAGGATGGACTGGGAGAAAGTGCTAAGAATATCGAAGG	GTCATCAGGAAATACCTCACTGCCCTTCAGCTTCCCGATATCCGACGGTAGTGTNNNNNTCCTCTTGCCTTACTT	42119925	42120097	+	0	1
INF1_smMIP_MEI1_15	22:42119967-42120118/16,24/-	0.915443	22	42120103	42120118	TTGTTATTGAACCTAG	2	42119967	42119990	CATGGACACAAAGAGATCATACTT	1	42119991	42120102	AGACCAGGAATCACAAGACAACTACCTTTTTGAGCACCAAAGGCAGTGAGGTATTTCCTGATGACCCTTCGATATTCTTAGCACTTTCTCCCAGTCCATCCTGGTTCATGAT	CATGGACACAAAGAGATCATACTTCTTCAGCTTCCCGATATCCGACGGTAGTGTNNNNNTTGTTATTGAACCTAG	42119925	42120097	-	0	1
INF1_smMIP_MEI1_16	22:42125615-42125766/22,18/+	0.914534	22	42125615	42125636	TTCTGGTCCTATTCGTGGTGTG	1	42125749	42125766	GCATGCGTCAGCCTTCAT	1	42125637	42125748	ACTGGGGTACTTTTTGCTGCCTGTTTCTCCAGCTTCTCCTCTCTAGAGATGAAACCCTGCAGGTGGCCAGTGCTCACTGTATAACTGCGGTGCTTGTCCACTCCCCAGCAAA	GCATGCGTCAGCCTTCATCTTCAGCTTCCCGATATCCGACGGTAGTGTNNNNNTTCTGGTCCTATTCGTGGTGTG	42125647	42125803	+	0	1
INF1_smMIP_MEI1_17	22:42125694-42125845/18,22/-	0.876867	22	42125828	42125845	TGAACCTGTCACCACCCC	1	42125694	42125715	CAGTGAGCACTGGCCACCTGCA	1	42125716	42125827	ATCCTTCTAGTATAGGGAGGAGAAGGTTAGAAGTGTTCCCCTACCTGGGATGTCAGCGTGGATGAAGGCTGACGCATGCTTTGCTGGGGAGTGGACAAGCACCGCAGTTATA	CAGTGAGCACTGGCCACCTGCACTTCAGCTTCCCGATATCCGACGGTAGTGTNNNNNTGAACCTGTCACCACCCC	42125647	42125803	-	0	1
INF1_smMIP_MEI1_18	22:42125766-42125917/16,24/-	0.898531	22	42125902	42125917	TCATACAAGAAATCTG	2	42125766	42125789	CCCTACCTGGGATGTCAGCGTGGA	1	42125790	42125901	TAGCAATAGGATTCAGATGTTATGAGACATAGTTCATAGGGTCTGTCATACACAATTGAACCTGTCACCACCCCATCCTTCTAGTATAGGGAGGAGAAGGTTAGAAGTGTTC	CCCTACCTGGGATGTCAGCGTGGACTTCAGCTTCCCGATATCCGACGGTAGTGTNNNNNTCATACAAGAAATCTG	42125647	42125803	-	0	1
INF1_smMIP_MEI1_19	22:42126474-42126625/19,21/-	0.903338	22	42126607	42126625	CTTGGAAAAAAAGAGTGGC	1	42126474	42126494	ATGACAGCCATGTGATCACGA	1	42126495	42126606	TCTTCTACCAGGAGTGTCAAGCAGTTACAGCTGGACCAGACGAGCACTTCACTGGAAGAAGAAAGATGCTCAAAGAGGAACTCTAACAAGGGAGAGGATGAGAAAACAATAA	ATGACAGCCATGTGATCACGACTTCAGCTTCCCGATATCCGACGGTAGTGTNNNNNCTTGGAAAAAAAGAGTGGC	42126503	42126661	-	0	1
INF1_smMIP_MEI1_20	22:42126529-42126680/21,19/+	0.917888	22	42126529	42126549	CCTCTTTGAGCATCTTTCTTC	1	42126662	42126680	ACTAGCTTTGGGTTGGGTG	1	42126550	42126661	TTCCAGTGAAGTGCTCGTCTGGTCCAGCTGTAACTGCTTGACACTCCTGGTAGAAGAGCCACTCTTTTTTTCCAAGTGCCACACGGTGTATGGTTGGTAGTAAGGGTCCTGT	ACTAGCTTTGGGTTGGGTGCTTCAGCTTCCCGATATCCGACGGTAGTGTNNNNNCCTCTTTGAGCATCTTTCTTC	42126503	42126661	+	0	1
INF1_smMIP_MEI1_21	22:42128186-42128337/21,19/-	0.902943	22	42128317	42128337	TTCAGCGAAAAGCAGCAGGCC	1	42128186	42128204	TGTTCCTTCACTGCCCACC	1	42128205	42128316	CTGCTTGTGCAGCTCTATGTTGTTCATCTTCAGGCTTCCCTGCAGGCTCCTCACCACTGCCTCGATCCCTACCACAGGATGACATGACAGAGGCCAGGGATCAGTGCTCTCT	TGTTCCTTCACTGCCCACCCTTCAGCTTCCCGATATCCGACGGTAGTGTNNNNNTTCAGCGAAAAGCAGCAGGCC	42128227	42128368	-	0	1
INF1_smMIP_MEI1_22	22:42128237-42128388/20,20/-	0.901783	22	42128369	42128388	TCTGGCCCCTACAAGCCTCA	1	42128237	42128256	CTCGATCCCTACCACAGGAT	1	42128257	42128368	TGTTCCACCACTTTGCTCACCGGGTCAGGATTTCAGCGAAAAGCAGCAGGCCCTGCTTGTGCAGCTCTATGTTGTTCATCTTCAGGCTTCCCTGCAGGCTCCTCACCACTGC	CTCGATCCCTACCACAGGATCTTCAGCTTCCCGATATCCGACGGTAGTGTNNNNNTCTGGCCCCTACAAGCCTCA	42128227	42128368	-	0	1
INF1_smMIP_MEI1_23	22:42128429-42128580/21,19/-	0.916832	22	42128560	42128580	GCCTCAGCAGCCACCTCCAGC	1	42128429	42128447	GTAGGTGAACTCTTCTCAC	1	42128448	42128559	ACAGGGCTGCTAACTGCTTCTTGGAGGGCACGGCCAGCATCTCTGCACATGGCTGAGCTTGTGAACAGCTTGATCTCCTCTGGCTGCCTGAGAAATGGAAGATGAGAAACGA	GTAGGTGAACTCTTCTCACCTTCAGCTTCCCGATATCCGACGGTAGTGTNNNNNGCCTCAGCAGCCACCTCCAGC	42128451	42128627	-	0	1
INF1_smMIP_MEI1_24	22:42128538-42128689/17,23/+	0.904453	22	42128538	42128554	AAGAAGCAGTTAGCAGC	2	42128667	42128689	GCCAGGGTAGCGGATATTTAAGT	1	42128555	42128666	CCTGTGCTGGAGGTGGCTGCTGAGGCCTTGAAGGCCACTTCTGCTTTTCTGAGGTGAGAGACCCAGGCAGGCTGAACTTTCCATCCCTGCATATACCTAAGGGCCTGTTGAG	GCCAGGGTAGCGGATATTTAAGTCTTCAGCTTCCCGATATCCGACGGTAGTGTNNNNNAAGAAGCAGTTAGCAGC	42128451	42128627	+	0	1
INF1_smMIP_MEI1_25	22:42139032-42139183/16,24/+	0.901103	22	42139032	42139047	TTGGGAATACCGTTGC	1	42139160	42139183	GCGGAGTTTTCCCAGACCTTGCTG	1	42139048	42139159	CTTACCGTGAACCTGCTTTTGTCTCTCTGGATGCAGGAAGGACCATCAGAGCACTCCACCTGTGCAGTATGGGGAACTGCAGGCTTTGCTAGAAGCCATGCTAAACCGATGT	GCGGAGTTTTCCCAGACCTTGCTGCTTCAGCTTCCCGATATCCGACGGTAGTGTNNNNNTTGGGAATACCGTTGC	42139062	42139218	+	0	1
INF1_smMIP_MEI1_26	22:42139107-42139258/16,24/+	0.869749	22	42139107	42139122	CTGTGCAGTATGGGGA	1	42139235	42139258	GCTGCAGTGTGTTTTTAGAAAGAT	1	42139123	42139234	ACTGCAGGCTTTGCTAGAAGCCATGCTAAACCGATGTGCGGAGTTTTCCCAGACCTTGCTGAGCAGGAGGCCCCTGGTCAGTGTACTGCAGCCTGCTGCTTCCGAAGATCAT	GCTGCAGTGTGTTTTTAGAAAGATCTTCAGCTTCCCGATATCCGACGGTAGTGTNNNNNCTGTGCAGTATGGGGA	42139062	42139218	+	0	1
INF1_smMIP_MEI1_27	22:42140920-42141071/17,23/+	0.905837	22	42140920	42140936	GACTGAGACACAGCATA	1	42141049	42141071	GGATTTAGAAGTGCCTGCAGGTG	1	42140937	42141048	TACTTGATCACTAGGTTCCTGTCTCTCCTTCCCACCTCAGGGCCATGCCTCCAGTAGAGATTCAGAGAAGGCCATTCTTCAAAGGGGAAAGTTCCTCCTCAGCACTCTGGAG	GGATTTAGAAGTGCCTGCAGGTGCTTCAGCTTCCCGATATCCGACGGTAGTGTNNNNNGACTGAGACACAGCATA	42140955	42141088	+	0	1
INF1_smMIP_MEI1_28	22:42140990-42141141/18,22/+	0.895755	22	42140990	42141007	GTAGAGATTCAGAGAAGG	2	42141120	42141141	GGGATTCAGACAATGGGTGAAG	1	42141008	42141119	CCATTCTTCAAAGGGGAAAGTTCCTCCTCAGCACTCTGGAGGGATTTAGAAGTGCCTGCAGGTGAGGGGCCCTCTGAGGTATGAAGTAATAGCATGGAAGGTAGGGGTGGAA	GGGATTCAGACAATGGGTGAAGCTTCAGCTTCCCGATATCCGACGGTAGTGTNNNNNGTAGAGATTCAGAGAAGG	42140955	42141088	+	0	1
INF1_smMIP_MEI1_29	22:42141837-42141988/16,24/-	0.908972	22	42141973	42141988	AAATTCTGAGAAGGCC	4	42141837	42141860	CTACCACCTATGCAACCTAAAGGT	1	42141861	42141972	TCCAAGGTGTCTTCCTTCTTGGCGCTGGGAGCTGTGAATGGATTCTCCTGGGCTGAAGGCTCACTCTGGAATTCTATAGCCAACCTAAGAAATCAATGTGTGAGTATATCCA	CTACCACCTATGCAACCTAAAGGTCTTCAGCTTCCCGATATCCGACGGTAGTGTNNNNNAAATTCTGAGAAGGCC	42141867	42142050	-	0	1
INF1_smMIP_MEI1_30	22:42141939-42142090/17,23/-	0.908388	22	42142074	42142090	TCGCCTGCACATTCTTC	2	42141939	42141961	TTCCTTCTTGGCGCTGGGAGCTG	1	42141962	42142073	TCTTCCCCAAGCTTCATGTTGCCCGTGGCTCAGGAGAACCCACCATCACCATGGGGATACACAGCGAGTCACAGGCACTGAGAAGAAATTCTGAGAAGGCCTCCAAGGTGTC	TTCCTTCTTGGCGCTGGGAGCTGCTTCAGCTTCCCGATATCCGACGGTAGTGTNNNNNTCGCCTGCACATTCTTC	42141867	42142050	-	0	1
INF1_smMIP_MEI1_31	22:42144043-42144194/19,21/+	0.90116	22	42144043	42144061	TTCTCTGATGCCTTTTCTT	4	42144174	42144194	CTCTTTGTCATCGTTCCCCAC	1	42144062	42144173	CAGAGGCTCAGTCCCCGTGGGCTGTGTTCTCTCTCCTGGTTCTTTGCAGAGACACTTGGAGCAGACCACCCACCCAGCTTTGATGGAAGTTTTCCTCTCAATTCTACATAAC	CTCTTTGTCATCGTTCCCCACCTTCAGCTTCCCGATATCCGACGGTAGTGTNNNNNTTCTCTGATGCCTTTTCTT	42144089	42144242	+	0	1
INF1_smMIP_MEI1_32	22:42144110-42144261/21,19/+	0.928928	22	42144110	42144130	GAGACACTTGGAGCAGACCAC	1	42144243	42144261	GAGGTTGGGAGGGAGGCAA	1	42144131	42144242	CCACCCAGCTTTGATGGAAGTTTTCCTCTCAATTCTACATAACCTCTTTGTCATCGTTCCCCACATGAAGGAGAAGTTTTCCAAGAAGCTTGGTAGGCAGCAGGCAAATGTG	GAGGTTGGGAGGGAGGCAACTTCAGCTTCCCGATATCCGACGGTAGTGTNNNNNGAGACACTTGGAGCAGACCAC	42144089	42144242	+	0	1
INF1_smMIP_MEI1_33	22:42148551-42148702/22,18/+	0.90088	22	42148551	42148572	GTCTGGTTTAAACTGCTCTCTG	1	42148685	42148702	GCCAAGGGGCCAATGTCC	1	42148573	42148684	CTTTATTCCCACTTCTCTGAAGCTTCCTCATCCTTCATACGACTGACCCTGGAGCTGAAGGCCAGGTTTTGCAGTGGTCTGAGGTATGTGTGGTCCCAGGCAAGATTGAGTG	GCCAAGGGGCCAATGTCCCTTCAGCTTCCCGATATCCGACGGTAGTGTNNNNNGTCTGGTTTAAACTGCTCTCTG	42148573	42148675	+	0	1
INF1_smMIP_MEI1_34	22:42149885-42150036/20,20/-	0.902162	22	42150017	42150036	GGTCCTGTCTTCTCTGGAGC	1	42149885	42149904	GCTGGGAGAGCATTATCCCT	1	42149905	42150016	TGAGAGAAGGTTGAGGCACATATAGTAGAGGAAATTGGAACACACCTGGTTTAGGGCTGAGTGACTTAGAGGGAGAAGAAGAAAGAATAGAAGAGATGACATTGCTACTTTG	GCTGGGAGAGCATTATCCCTCTTCAGCTTCCCGATATCCGACGGTAGTGTNNNNNGGTCCTGTCTTCTCTGGAGC	42149931	42150070	-	0	1
INF1_smMIP_MEI1_35	22:42149946-42150097/21,19/-	0.920481	22	42150077	42150097	TAAAGACCAGCACAGGCCACA	1	42149946	42149964	AGGGCTGAGTGACTTAGAG	1	42149965	42150076	TGAGTGGTCAAATTGTAGCATCTTACCTTCTTTGGAAGGTGGTCCTGTCTTCTCTGGAGCTGAGAGAAGGTTGAGGCACATATAGTAGAGGAAATTGGAACACACCTGGTTT	AGGGCTGAGTGACTTAGAGCTTCAGCTTCCCGATATCCGACGGTAGTGTNNNNNTAAAGACCAGCACAGGCCACA	42149931	42150070	-	0	1
INF1_smMIP_MEI1_36	22:42154288-42154439/20,20/-	0.889506	22	42154420	42154439	AAGGCTTTCAGGGCTCCTGC	1	42154288	42154307	CATTAGTACCTACTACATGC	1	42154308	42154419	TGCTTATCTGGGGCAGCCCATGCTGCAGGAGCTCAGACACTGCAGAGAGTTCTAGGGAGGGAATAAGTAGAGGAAAGCCACACAGAGAACATAGAAGAACAGGTAATCAGCA	CATTAGTACCTACTACATGCCTTCAGCTTCCCGATATCCGACGGTAGTGTNNNNNAAGGCTTTCAGGGCTCCTGC	42154347	42154557	-	0	1
INF1_smMIP_MEI1_36b	22:42154288-42154439/20,20/-	0.889506	22	42154420	42154439	AAGGCTTTCGGGGCTCCTGC	1	42154288	42154307	CATTAGTACCTACTACATGC	1	42154308	42154419	TGCTTATCTGGGGCAGCCCATGCTGCAGGAGCTCAGACACTGCAGAGAGTTCTAGGGAGGGAATAAGTAGAGGAAAGCCACACAGAGAACATAGAAGAACAGGTAATCAGCA	CATTAGTACCTACTACATGCCTTCAGCTTCCCGATATCCGACGGTAGTGTNNNNNAAGGCTTTCGGGGCTCCTGC	42154347	42154557	-	0	1
INF1_smMIP_MEI1_37	22:42154340-42154491/16,24/-	0.87994	22	42154476	42154491	ACTGTCTCTGGCGAGC	1	42154340	42154363	GAGGGAATAAGTAGAGGAAAGCCA	1	42154364	42154475	AGCTCCCTCCATGTACTGGCGATCAGACAGGAAGGCAAGGCTTTCAGGGCTCCTGCTGCTTATCTGGGGCAGCCCATGCTGCAGGAGCTCAGACACTGCAGAGAGTTCTAGG	GAGGGAATAAGTAGAGGAAAGCCACTTCAGCTTCCCGATATCCGACGGTAGTGTNNNNNACTGTCTCTGGCGAGC	42154347	42154557	-	0	1
INF1_smMIP_MEI1_38	22:42154438-42154589/16,24/+	0.897748	22	42154438	42154453	TTGCCTTCCTGTCTGA	7	42154566	42154589	GTGGGTCTTGGGACCTTCATCAGC	1	42154454	42154565	TCGCCAGTACATGGAGGGAGCTGCTCGCCAGAGACAGTACTGCATCCTGCTCCTCTTCTACTTGGCCTACATCCATGAAGACAGGTCAGTGCACAGAGGTGGGTGGCTGGTG	GTGGGTCTTGGGACCTTCATCAGCCTTCAGCTTCCCGATATCCGACGGTAGTGTNNNNNTTGCCTTCCTGTCTGA	42154347	42154557	+	0	1
INF1_smMIP_MEI1_39	22:42155204-42155355/16,24/+	0.476117	22	42155204	42155219	AATAATTTGTTGGGCC	3	42155332	42155355	TACTAAAAATACAAAAATCAGGCC	20	42155220	42155331	GGGTGCAGTGGCTCACACCTGTAATCCCAGCACTTTGGGAGGCCGAGGCGGGTGGATCACCTGAGGTCAGGAGTTTGAGACCAGCCTGACCAACAAGGTGAAACCCTGTCTC	TACTAAAAATACAAAAATCAGGCCCTTCAGCTTCCCGATATCCGACGGTAGTGTNNNNNAATAATTTGTTGGGCC	42155231	42155570	+	0	10
INF1_smMIP_MEI1_39b	22:42155204-42155355/16,24/+	0.476117	22	42155204	42155219	AATAATTTGTTGGGCC	3	42155332	42155355	TACTAAAAATACAAAAATCAGGCT	20	42155220	42155331	GGGTGCAGTGGCTCACACCTGTAATCCCAGCACTTTGGGAGGCCGAGGCGGGTGGATCACCTGAGGTCAGGAGTTTGAGACCAGCCTGACCAACAAGGTGAAACCCTGTCTC	TACTAAAAATACAAAAATCAGGCTCTTCAGCTTCCCGATATCCGACGGTAGTGTNNNNNAATAATTTGTTGGGCC	42155231	42155570	+	0	1
INF1_smMIP_MEI1_40	22:42155209-42155360/18,22/-	0.916227	22	42155343	42155360	CGCCCGGCCTGATTTTTG	8	42155209	42155230	CCACTGCACCCGGCCCAACAAA	4	42155231	42155342	TATTTTTAGTAGAGACAGGGTTTCACCTTGTTGGTCAGGCTGGTCTCAAACTCCTGACCTCAGGTGATCCACCCGCCTCGGCCTCCCAAAGTGCTGGGATTACAGGTGTGAG	CCACTGCACCCGGCCCAACAAACTTCAGCTTCCCGATATCCGACGGTAGTGTNNNNNCGCCCGGCCTGATTTTTG	42155231	42155570	-	10	0
INF1_smMIP_MEI1_41	22:42155286-42155437/22,18/+	0.93905	22	42155286	42155307	TCAGGAGTTTGAGACCAGCCTG	52806	42155420	42155437	TCAGGAGATCGAGACCAT	60404	42155308	42155419	ACCAACAAGGTGAAACCCTGTCTCTACTAAAAATACAAAAATCAGGCCGGGCGCGGTGGCTTACTCCTGTAATCCCAGCTCTTTGGGAGGCCGAGATGGGCAGATCACGAGG	TCAGGAGATCGAGACCATCTTCAGCTTCCCGATATCCGACGGTAGTGTNNNNNTCAGGAGTTTGAGACCAGCCTG	42155231	42155570	+	0	0
INF1_smMIP_MEI1_42	22:42155325-42155476/22,18/-	0.995736	22	42155455	42155476	TATTTTTAGTAGAGACGGGGTT	97722	42155325	42155342	TATTTTTAGTAGAGACAG	81317	42155343	42155454	TTACCTTGTTAGCCATGATGGTCTCGATCTCCTGACCTCGTGATCTGCCCATCTCGGCCTCCCAAAGAGCTGGGATTACAGGAGTAAGCCACCGCGCCCGGCCTGATTTTTG	TATTTTTAGTAGAGACAGCTTCAGCTTCCCGATATCCGACGGTAGTGTNNNNNTATTTTTAGTAGAGACGGGGTT	42155231	42155570	-	0	0
INF1_smMIP_MEI1_43	22:42155427-42155578/17,23/-	0.89157	22	42155562	42155578	CACTGAGAGCTCTGCCT	7	42155427	42155449	TTGTTAGCCATGATGGTCTCGAT	5	42155450	42155561	CCCGGGTTCACACCATTCTCCTGCCTCAGCCTCCCGAGTAGCTGGGACTACAGGCACCCACCACCATGCCCAGCTAATTTTTTTGTATTTTTAGTAGAGACGGGGTTTTACC	TTGTTAGCCATGATGGTCTCGATCTTCAGCTTCCCGATATCCGACGGTAGTGTNNNNNCACTGAGAGCTCTGCCT	42155231	42155570	-	0	1
INF1_smMIP_MEI1_43b	22:42155427-42155578/17,23/-	0.89157	22	42155562	42155578	CATTGAGAGCTCTGCCT	7	42155427	42155449	TTGTTAGCCATGATGGTCTCGAT	5	42155450	42155561	CCCGGGTTCACACCATTCTCCTGCCTCAGCCTCCCGAGTAGCTGGGACTACAGGCACCCACCACCATGCCCAGCTAATTTTTTTGTATTTTTAGTAGAGACGGGGTTTTACC	TTGTTAGCCATGATGGTCTCGATCTTCAGCTTCCCGATATCCGACGGTAGTGTNNNNNCATTGAGAGCTCTGCCT	42155231	42155570	-	0	1
INF1_smMIP_MEI1_44b	22:42155438-42155589/21,19/+	0.868722	22	42155438	42155458	CATGGCTAACAAGGTAAAACC	1	42155571	42155589	TCTCAATGAGCCGAGATCG	17	42155459	42155570	CCGTCTCTACTAAAAATACAAAAAAATTAGCTGGGCATGGTGGTGGGTGCCTGTAGTCCCAGCTACTCGGGAGGCTGAGGCAGGAGAATGGTGTGAACCCGGGAGGCAGAGC	TCTCAATGAGCCGAGATCGCTTCAGCTTCCCGATATCCGACGGTAGTGTNNNNNCATGGCTAACAAGGTAAAACC	42155231	42155570	+	0	20
INF1_smMIP_MEI1_44	22:42155438-42155589/21,19/+	0.868722	22	42155438	42155458	CATGGCTAACAAGGTAAAACC	1	42155571	42155589	TCTCAGTGAGCCGAGATCG	17	42155459	42155570	CCGTCTCTACTAAAAATACAAAAAAATTAGCTGGGCATGGTGGTGGGTGCCTGTAGTCCCAGCTACTCGGGAGGCTGAGGCAGGAGAATGGTGTGAACCCGGGAGGCAGAGC	TCTCAGTGAGCCGAGATCGCTTCAGCTTCCCGATATCCGACGGTAGTGTNNNNNCATGGCTAACAAGGTAAAACC	42155231	42155570	+	0	20
INF1_smMIP_MEI1_45	22:42155509-42155660/21,19/-	0.462245	22	42155640	42155660	ATTTATTTATTTATTTATTTA	56420	42155509	42155527	CGAGTAGCTGGGACTACAG	62285	42155528	42155639	TTTTTTGAGACGGAGTCTCGCTCTGTCGCCCAGGCTGGAGTGCAGTGGCACGATCTCGGCTCACTGAGAGCTCTGCCTCCCGGGTTCACACCATTCTCCTGCCTCAGCCTCC	CGAGTAGCTGGGACTACAGCTTCAGCTTCCCGATATCCGACGGTAGTGTNNNNNATTTATTTATTTATTTATTTA	42155231	42155570	-	10	20
INF1_smMIP_MEI1_46	22:42159102-42159253/22,18/-	0.912348	22	42159232	42159253	GGGGCGCTCGCCCTGGTCCTGC	1	42159102	42159119	CTATTCTGCCTGGCCGCA	1	42159120	42159231	AGCGACAGGAGGAAGCTTTGCACAGCCTCAAATAACTCTGCCTCTGAGACAAACCTGTCAACCAAGAAAAGCCTGAGTGAGAAAGGCAGAGTTGGCAGGCCACTGGGCTCTT	CTATTCTGCCTGGCCGCACTTCAGCTTCCCGATATCCGACGGTAGTGTNNNNNGGGGCGCTCGCCCTGGTCCTGC	42159156	42159345	-	0	1
INF1_smMIP_MEI1_47	22:42159205-42159356/16,24/-	0.881299	22	42159341	42159356	GGACAAGGAGCCCAGG	9	42159205	42159228	GACAGGAGGAAGCTTTGCACAGCC	1	42159229	42159340	CATTGTGGTCCATACCTCACGTAGTGTATTGTCTTTGTCCTGGCAGATTGCAAGCAGATAGATGGAGGCTTTGAAGACCACCAGTGGGGGGCGCTCGCCCTGGTCCTGCAGC	GACAGGAGGAAGCTTTGCACAGCCCTTCAGCTTCCCGATATCCGACGGTAGTGTNNNNNGGACAAGGAGCCCAGG	42159156	42159345	-	0	1
INF1_smMIP_MEI1_48	22:42159289-42159440/19,21/+	0.90291	22	42159289	42159307	TGCAATCTGCCAGGACAAA	1	42159420	42159440	GGGTGGTAGAGAGAGACAAAG	1	42159308	42159419	GACAATACACTACGTGAGGTATGGACCACAATGCCTGGGCTCCTTGTCCTTCTGTACCTCTTTACATTAGTGTTCCCTGGGAGACCATGATGATGATAGTGTATAGACAAGC	GGGTGGTAGAGAGAGACAAAGCTTCAGCTTCCCGATATCCGACGGTAGTGTNNNNNTGCAATCTGCCAGGACAAA	42159156	42159345	+	0	1
INF1_smMIP_MEI1_49	22:42166634-42166785/21,19/+	0.93732	22	42166634	42166654	GGTCTCTTGGGTCCTCTGCAA	1	42166767	42166785	GCTCAGGTTCTTTCTGTTG	1	42166655	42166766	GGTGTATTTACCTCCTTTCTTTGTTTTGCCTCCAGACTATGGTCAGTGCAATCAGAAAATTCCTAGAAGGCATCCCAGACCTGCAGCTAGTCTATACTCACCATCCGCTCCT	GCTCAGGTTCTTTCTGTTGCTTCAGCTTCCCGATATCCGACGGTAGTGTNNNNNGGTCTCTTGGGTCCTCTGCAA	42166668	42166985	+	0	1
INF1_smMIP_MEI1_50	22:42166718-42166869/20,20/-	0.908709	22	42166850	42166869	ATCCAGTTCCTCATAGCTGC	1	42166718	42166737	CAGGTCTGGGATGCCTTCTA	1	42166738	42166849	TCTCTTCCCAGAAGAACCAAAGTTCCAGGACACGGTGCCCATACCTACTCATGAGCTCTGGATACAACAGAAAGAACCTGAGCAGGAGCGGATGGTGAGTATAGACTAGCTG	CAGGTCTGGGATGCCTTCTACTTCAGCTTCCCGATATCCGACGGTAGTGTNNNNNATCCAGTTCCTCATAGCTGC	42166668	42166985	-	10	1
INF1_smMIP_MEI1_51	22:42166801-42166952/21,19/-	0.870378	22	42166932	42166952	AGGATGCTGGGGATGCTTCTG	1	42166801	42166819	CACGGTGCCCATACCTACT	1	42166820	42166931	AGCAACTGGAACAGGACTACTAAGCTGGCAGGAAGGGCGGGCTGCCCAGCAGAGGTGACATCATCCAGTTCCTCATAGCTGCTCTCTTCCCAGAAGAACCAAAGTTCCAGGA	CACGGTGCCCATACCTACTCTTCAGCTTCCCGATATCCGACGGTAGTGTNNNNNAGGATGCTGGGGATGCTTCTG	42166668	42166985	-	0	1
INF1_smMIP_MEI1_52	22:42166908-42167059/16,24/-	0.893317	22	42167044	42167059	GCAGATGTGGGTGCCT	4	42166908	42166931	AGCAACTGGAACAGGACTACTAAG	1	42166932	42167043	CCTGACCTCAGTAAACCGGCTCTCAGAGAGAGAAGGCCCACGATTTCTGAATGTAGAAATGAATGAGTGGTTGCCTACCAGCAAGATGAGCAGGATGCTGGGGATGCTTCTG	AGCAACTGGAACAGGACTACTAAGCTTCAGCTTCCCGATATCCGACGGTAGTGTNNNNNGCAGATGTGGGTGCCT	42166668	42166985	-	0	1
INF1_smMIP_MEI1_53	22:42172055-42172206/17,23/-	0.880012	22	42172190	42172206	ATAAGACCGCCCACTTG	1	42172055	42172077	CAGAGGGTACTGCAGTTGGGGAA	1	42172078	42172189	GATATCCTCATTCCTCCTCAGGAAGGTCCTCAGGCTAATCAGTACCTTGTGAGCTGTGTCCACTGGGCTGGAATAGATGAGGTCCTGAGCAGGAGAGAAGAAAGCCAGAGAT	CAGAGGGTACTGCAGTTGGGGAACTTCAGCTTCCCGATATCCGACGGTAGTGTNNNNNATAAGACCGCCCACTTG	42172084	42172291	-	0	1
INF1_smMIP_MEI1_54	22:42172146-42172297/22,18/-	0.896313	22	42172276	42172297	TGTGCCCACAGCACCTGCAGAC	1	42172146	42172163	TCCTCAGGCTAATCAGTA	1	42172164	42172275	TGACCTCCTGATGGGGATGCCCCATGCTCCACTAGCAGACGCTGCAGGATCAGCAGGAAGTGGCCTCGGATAAGACCGCCCACTTGGATATCCTCATTCCTCCTCAGGAAGG	TCCTCAGGCTAATCAGTACTTCAGCTTCCCGATATCCGACGGTAGTGTNNNNNTGTGCCCACAGCACCTGCAGAC	42172084	42172291	-	0	1
INF1_smMIP_MEI1_55	22:42172254-42172405/21,19/-	0.885786	22	42172385	42172405	TGCCACAATGGCCTGGCTTTC	1	42172254	42172272	CCTCCTGATGGGGATGCCC	1	42172273	42172384	TTTTTCAGATAAAACCCTGATTCTCTCTCCTGGAGCAGACCTAACAAGGGTAGAGATGCCCATTCTCGACTGGCTTTCAGGTCAAAGTGTGCCCACAGCACCTGCAGACTGA	CCTCCTGATGGGGATGCCCCTTCAGCTTCCCGATATCCGACGGTAGTGTNNNNNTGCCACAATGGCCTGGCTTTC	42172084	42172291	-	0	1
INF1_smMIP_MEI1_56	22:42174648-42174799/16,24/+	0.897888	22	42174648	42174663	GGTGTCTGACCTTCAG	6	42174776	42174799	GCAAGAACTGGACAGCGTGGCCAT	1	42174664	42174775	GTGATCTGAGCATCAGGCTTCTTGCCCAGTCCTCCTTGTTCTTCACAGCCTCGGGGAACCTACCATTGCTGCTGAGCCTCCTCTCCCTGATGCAGCTCAGGAATGTGTCAGA	GCAAGAACTGGACAGCGTGGCCATCTTCAGCTTCCCGATATCCGACGGTAGTGTNNNNNGGTGTCTGACCTTCAG	42174690	42174836	+	0	1
INF1_smMIP_MEI1_56b	22:42174648-42174799/16,24/+	0.897888	22	42174648	42174663	GGTGTCTGACCTTCAG	6	42174776	42174799	GCAGGAACTGGACAGCGTGGCCAT	1	42174664	42174775	GTGATCTGAGCATCAGGCTTCTTGCCCAGTCCTCCTTGTTCTTCACAGCCTCGGGGAACCTACCATTGCTGCTGAGCCTCCTCTCCCTGATGCAGCTCAGGAATGTGTCAGA	GCAGGAACTGGACAGCGTGGCCATCTTCAGCTTCCCGATATCCGACGGTAGTGTNNNNNGGTGTCTGACCTTCAG	42174690	42174836	+	0	1
INF1_smMIP_MEI1_57	22:42174689-42174840/22,18/-	0.851695	22	42174819	42174840	CGCTATCCCAAGCAGCCAGGGC	1	42174689	42174706	AAGAACAAGGAGGACTGG	2	42174707	42174818	ACCTTGGTGAAGGAGCTTCATGGCCACGCTGTCCAGTTCTTGCTCTGACACATTCCTGAGCTGCATCAGGGAGAGGAGGCTCAGCAGCAATGGTAGGTTCCCCGAGGCTGTG	AAGAACAAGGAGGACTGGCTTCAGCTTCCCGATATCCGACGGTAGTGTNNNNNCGCTATCCCAAGCAGCCAGGGC	42174690	42174836	-	0	1
INF1_smMIP_MEI1_58	22:42174798-42174949/20,20/-	0.878608	22	42174930	42174949	GGACAGACTGACCTACTAGC	1	42174798	42174817	CCTTGGTGAAGGAGCTTCAT	1	42174818	42174929	TTCTTCCAAAGGGATGAAAGAGTAGAAGAAAGAAGAACACCAGCCTACTTAGTGAGCACCCACTGCACGTCCAGCCCTGGGCCCTTGGGCGCTATCCCAAGCAGCCAGGGCA	CCTTGGTGAAGGAGCTTCATCTTCAGCTTCCCGATATCCGACGGTAGTGTNNNNNGGACAGACTGACCTACTAGC	42174690	42174836	-	0	1
INF1_smMIP_MEI1_59	22:42177241-42177392/22,18/+	0.902033	22	42177241	42177262	TGTGAGTGTTTTGCGACAGGCC	1	42177375	42177392	CCACACCCAGCAGTCAGA	1	42177263	42177374	GACTGGGGACTTTCATCTCTTGCAGTAAGCAAGCTGTGTGGGAAGTGCAGCCCCACTGACGTGGACATCCTGCAGCCCTCCTTCAACTTCCTGTATTGGAGCCTTCATCAGA	CCACACCCAGCAGTCAGACTTCAGCTTCCCGATATCCGACGGTAGTGTNNNNNTGTGAGTGTTTTGCGACAGGCC	42177266	42177418	+	0	1
INF1_smMIP_MEI1_60	22:42177286-42177437/16,24/-	0.908886	22	42177422	42177437	GCCCAGCACTCTTCAC	2	42177286	42177309	CACTTCCCACACAGCTTGCTTACT	1	42177310	42177421	TGTCCCAGCCCGGGCCCCTGCACCTCTTTTCTGACTGCTGGGTGTGGTCTGATGAAGGCTCCAATACAGGAAGTTGAAGGAGGGCTGCAGGATGTCCACGTCAGTGGGGCTG	CACTTCCCACACAGCTTGCTTACTCTTCAGCTTCCCGATATCCGACGGTAGTGTNNNNNGCCCAGCACTCTTCAC	42177266	42177418	-	0	1
INF1_smMIP_MEI1_61	22:42177636-42177787/16,24/-	0.788642	22	42177772	42177787	GGAGTGCAGTCCTGGG	4	42177636	42177659	AGGAGTTACAGAGGAGCTTCAGCT	1	42177660	42177771	AGAATCTGCCTTTGCCAAGGTGAGGGCCAGCATCTTCTCCAGAAGCTCCATCAGGCCTGTGCTGCTCAGGAGCACTGCAGCAGCTGTCGGGGGTGGGCAAGGCAGGGCCCAC	AGGAGTTACAGAGGAGCTTCAGCTCTTCAGCTTCCCGATATCCGACGGTAGTGTNNNNNGGAGTGCAGTCCTGGG	42177667	42177869	-	0	1
INF1_smMIP_MEI1_62	22:42177742-42177893/16,24/-	0.886062	22	42177878	42177893	GAGTGCCACCCCATGC	2	42177742	42177765	TGCCTTTGCCAAGGTGAGGGCCAG	1	42177766	42177877	CTCAAAGCCACAGGAGTTAAAGACTAACCTGCAAACTGCCCTTGTGCTGCTGGGCAGAGAAGGAGGCAGTGAGCAGCCAGGCAGAGCAGAGGAGTGCAGTCCTGGGAGAATC	TGCCTTTGCCAAGGTGAGGGCCAGCTTCAGCTTCCCGATATCCGACGGTAGTGTNNNNNGAGTGCCACCCCATGC	42177667	42177869	-	0	1
INF1_smMIP_MEI1_63	22:42180286-42180437/16,24/+	0.91625	22	42180286	42180301	TTTTCTGCCCAGGCTT	8	42180414	42180437	ACTACTCTCAGGTATGGGTCCACA	1	42180302	42180413	CCAGAACATGGGGGTTAGCCCTTTACCCTGTGCCCTGCCAGGTTCACCAGACACTCTCTGTGGAAATGGACCAAGTATTGAAGGCTCTCAGCTTTCCAAAGAAAAAGGCTGC	ACTACTCTCAGGTATGGGTCCACACTTCAGCTTCCCGATATCCGACGGTAGTGTNNNNNTTTTCTGCCCAGGCTT	42180321	42180444	+	0	1
INF1_smMIP_MEI1_64	22:42180341-42180492/16,24/+	0.903049	22	42180341	42180356	AGGTTCACCAGACACT	1	42180469	42180492	GGTTTTCAGATAAGACCAGCACCC	1	42180357	42180468	CTCTGTGGAAATGGACCAAGTATTGAAGGCTCTCAGCTTTCCAAAGAAAAAGGCTGCACTACTCTCAGGTATGGGTCCACAAGTCTCCAGCAGAAGAAAAGCTTTTTCCCTA	GGTTTTCAGATAAGACCAGCACCCCTTCAGCTTCCCGATATCCGACGGTAGTGTNNNNNAGGTTCACCAGACACT	42180321	42180444	+	0	1
INF1_smMIP_MEI1_65	22:42180556-42180707/19,21/+	0.912147	22	42180556	42180574	TGGGTGGGAGGTGGGAAGG	2	42180687	42180707	GGGCCCAGCCACTGCCAGCCA	1	42180575	42180686	AGACAGGAATTGGGTGTAAGGAATCTCCTGCTTCCAGCTGCCATCTTATGCTTCCTGCGGACAGCCCTGCGACAAAGCTTTTCCTCTGCCCTGGTAGCCCTGGTGCCCTCAG	GGGCCCAGCCACTGCCAGCCACTTCAGCTTCCCGATATCCGACGGTAGTGTNNNNNTGGGTGGGAGGTGGGAAGG	42180590	42180807	+	0	1
INF1_smMIP_MEI1_66	22:42180589-42180740/16,24/-	0.75922	22	42180725	42180740	ACATTCGCAGTGGAGC	1	42180589	42180612	GCTGGAAGCAGGAGATTCCTTACA	1	42180613	42180724	TAGGACAGTGTCCTTGGTGGCTGGCAGTGGCTGGGCCCCTGAGGGCACCAGGGCTACCAGGGCAGAGGAAAAGCTTTGTCGCAGGGCTGTCCGCAGGAAGCATAAGATGGCA	GCTGGAAGCAGGAGATTCCTTACACTTCAGCTTCCCGATATCCGACGGTAGTGTNNNNNACATTCGCAGTGGAGC	42180590	42180807	-	0	1
INF1_smMIP_MEI1_67	22:42180695-42180846/16,24/-	0.837789	22	42180831	42180846	AGCCACCCCTTCCTGC	11	42180695	42180718	AGTGTCCTTGGTGGCTGGCAGTGG	1	42180719	42180830	TGTTGTCCTGGGAGAAGCAAGCCCCACTCAGCAAGGGCCTTACCTGCACCAGGAGGTTCTGCAGCCCAATGACCAGGGACCGGACTTGCGACATTCGCAGTGGAGCTAGGAC	AGTGTCCTTGGTGGCTGGCAGTGGCTTCAGCTTCCCGATATCCGACGGTAGTGTNNNNNAGCCACCCCTTCCTGC	42180590	42180807	-	0	1
INF1_smMIP_MEI1_68	22:42189775-42189926/16,24/+	0.907435	22	42189775	42189790	GGCACCAAAAGCCATT	3	42189903	42189926	GCCCAGACATTGGTAGAAACTCTC	1	42189791	42189902	GGTAGCAAAACCTGACCTGATTTTTTTTTTTTTTTTCTGCAGAAGGACCCTCTATTGTCCCAGGCCTGTGTTGGCTGCCTGGAGGCCTTGCTTGACTACCTGGATGCCCGGA	GCCCAGACATTGGTAGAAACTCTCCTTCAGCTTCCCGATATCCGACGGTAGTGTNNNNNGGCACCAAAAGCCATT	42189811	42189934	+	0	1
INF1_smMIP_MEI1_69	22:42189849-42190000/22,18/-	0.916704	22	42189979	42190000	ATGGAAGGCTGGAGCAGGAGGG	1	42189849	42189866	AGCCAACACAGGCCTGGG	2	42189867	42189978	TGGAAGGGTGTTGCTCCCTCTAATCTCTCTCATGGGAACATCAGATAATGTGGAGAGTTTCTACCAATGTCTGGGCTCCGGGCATCCAGGTAGTCAAGCAAGGCCTCCAGGC	AGCCAACACAGGCCTGGGCTTCAGCTTCCCGATATCCGACGGTAGTGTNNNNNATGGAAGGCTGGAGCAGGAGGG	42189811	42189934	-	0	1
INF1_smMIP_MEI1_70	22:42190333-42190484/21,19/+	0.905286	22	42190333	42190353	GGCAAGGTCTTGGAAGCATTA	1	42190466	42190484	GAGGCTCATGACCCTGGTA	1	42190354	42190465	ACAACCCAGTGTTTCTTGAAGCTCTCCACGTGGCCTCCCAGCCTTGGAATCGGTTTTTGCTGTTTACCCTCTTGGATGCTGGAGAGAATTCCTTCCTCAGACCTGAGATTTT	GAGGCTCATGACCCTGGTACTTCAGCTTCCCGATATCCGACGGTAGTGTNNNNNGGCAAGGTCTTGGAAGCATTA	42190353	42190501	+	0	1
INF1_smMIP_MEI1_71	22:42190372-42190523/20,20/+	0.912611	22	42190372	42190391	AAGCTCTCCACGTGGCCTCC	1	42190504	42190523	GTGGTCTGAGGAGTGTCATG	1	42190392	42190503	CAGCCTTGGAATCGGTTTTTGCTGTTTACCCTCTTGGATGCTGGAGAGAATTCCTTCCTCAGACCTGAGATTTTGAGGCTCATGACCCTGGTAAGTGCAGAAAGGATATCTT	GTGGTCTGAGGAGTGTCATGCTTCAGCTTCCCGATATCCGACGGTAGTGTNNNNNAAGCTCTCCACGTGGCCTCC	42190353	42190501	+	0	1
INF1_smMIP_MEI1_72	22:42191342-42191493/21,19/+	0.900589	22	42191342	42191362	GGGCACAGCAGTTGTCTATGA	1	42191475	42191493	GGTGTGGCTTTGGCTGACC	2	42191363	42191474	TGAAGGAGATGCCAAATCACTGGGTGTTTGGGGGTTTCTCTTCCTGGGCCAGTTTATGCGGTACCGGAGTAGCAGTGTCCTCTCTCATGAAGAGGTGGGTGATGTTCTGCAA	GGTGTGGCTTTGGCTGACCCTTCAGCTTCCCGATATCCGACGGTAGTGTNNNNNGGGCACAGCAGTTGTCTATGA	42191393	42191566	+	0	1
INF1_smMIP_MEI1_73	22:42191454-42191605/17,23/+	0.817635	22	42191454	42191470	GAGGTGGGTGATGTTCT	3	42191583	42191605	GCTAGACCCTCAACACCATCTTC	1	42191471	42191582	GCAAGGTGTGGCTTTGGCTGACCTGTCTACCCTCTCGAACACCACACTCCAGGCCCTGCATGGCTTCTTCCAGCAGGTGGGTGGGAAGGGGAGGCCATGCAGCCACTGTAAA	GCTAGACCCTCAACACCATCTTCCTTCAGCTTCCCGATATCCGACGGTAGTGTNNNNNGAGGTGGGTGATGTTCT	42191393	42191566	+	0	1
INF1_smMIP_MEI1_74	22:42191466-42191617/16,24/-	0.874045	22	42191602	42191617	CACCCTCCAAGAGAAG	4	42191466	42191489	AGCCAAAGCCACACCTTGCAGAAC	2	42191490	42191601	ATGGTGTTGAGGGTCTAGCTTTACAGTGGCTGCATGGCCTCCCCTTCCCACCCACCTGCTGGAAGAAGCCATGCAGGGCCTGGAGTGTGGTGTTCGAGAGGGTAGACAGGTC	AGCCAAAGCCACACCTTGCAGAACCTTCAGCTTCCCGATATCCGACGGTAGTGTNNNNNCACCCTCCAAGAGAAG	42191393	42191566	-	0	1
INF1_smMIP_MEI1_75	22:42191656-42191807/22,18/-	0.797999	22	42191786	42191807	AAGGCCCTCCAAGGAGGCCTGC	1	42191656	42191673	CCTCCATCCTCTGTACTT	1	42191674	42191785	AGGGTCTGGGCCATGCTGTGGTCAGCCAGGTGTCCCATGCTCTGGAGCTGCAGGGAGAAGAGGGCAGGGAAGACAGGCCTCCTCAGTGCCCATTCCACACAGGCCCTAACTG	CCTCCATCCTCTGTACTTCTTCAGCTTCCCGATATCCGACGGTAGTGTNNNNNAAGGCCCTCCAAGGAGGCCTGC	42191717	42191871	-	0	1
INF1_smMIP_MEI1_76	22:42191762-42191913/19,21/-	0.8292	22	42191895	42191913	AGAGAAGCCCCAAACACCC	1	42191762	42191782	GTCTGGGCCATGCTGTGGTCA	1	42191783	42191894	AGTGATTTGGCATCTCCTTCATCATAGATGCAAGAAAGGATACAGCATGTCCTGCAGGGGTGGCTGGCCTGAGGAGGTGCTAGGGGGAAGGCCCTCCAAGGAGGCCTGCAGG	GTCTGGGCCATGCTGTGGTCACTTCAGCTTCCCGATATCCGACGGTAGTGTNNNNNAGAGAAGCCCCAAACACCC	42191717	42191871	-	0	1
INF1_smMIP_MEI1_77	22:42195198-42195349/18,22/+	0.86344	22	42195198	42195215	GTGATGCCCCCATGGTTG	2	42195328	42195349	GTGGAGAGAGAATGAGACCTGG	1	42195216	42195327	GCCCCACTTCTCTGCTGTTTTCCTCTCATGTTTTGCTGCCAGCTGCCTGGGAGGGGTGGCTGTATCCCTGTCCCACATCAGAAACTGATCCTCAGGACTTGAAGGCCCAGAA	GTGGAGAGAGAATGAGACCTGGCTTCAGCTTCCCGATATCCGACGGTAGTGTNNNNNGTGATGCCCCCATGGTTG	42195236	42195323	+	0	1
INF1_smMIP_MEI1_78	3:146159532-146159683/19,21/-	0.8711	3	146159665	146159683	GATCCCTTAGCATTTCTGC	1	146159532	146159552	GGATTAATGTAAGTCTCCTCA	1	146159553	146159664	ATCTGATCTCTGTTTGGTTTCTGAGAATTCATTTCTGTATTTTTGTTTTTATCCAGGACTACATGTTTTTTGAAAGAACTAGGTAATGACTGGAATGTCAGAGTGTGGGAGT	GGATTAATGTAAGTCTCCTCACTTCAGCTTCCCGATATCCGACGGTAGTGTNNNNNGATCCCTTAGCATTTCTGC	146159557	146159628	-	0	1
INF1_smMIP_CCDC39_1	3:180332636-180332787/21,19/-	0.933809	3	180332767	180332787	ACTAGTAGGCAGCCCTTCTAG	1	180332636	180332654	AAATACAAAACGACCCAAC	2	180332655	180332766	GCCATCTAGTGCTAGTAGTAGCTCTAGTAATGTTAAGAGCAAAAAGAGCAGCAAATAAACATTTTAATCTCTTCTGAAAAAGTTGTAAACACAAAAACAAAAATATACTTTA	AAATACAAAACGACCCAACCTTCAGCTTCCCGATATCCGACGGTAGTGTNNNNNACTAGTAGGCAGCCCTTCTAG	180332687	180332885	-	0	20
INF1_smMIP_CCDC39_2	3:180332717-180332868/21,19/-	0.904218	3	180332848	180332868	TAGGTCATCTAGGAGTACAAG	1	180332717	180332735	GTTAAGAGCAAAAAGAGCA	1	180332736	180332847	TACATCTACTTCTCAGTCTTCAATTAAAGTACTGGAGCTTAAATTCCCGGCCTCCTCTTCACTAGTAGGCAGCCCTTCTAGGCCATCTAGTGCTAGTAGTAGCTCTAGTAAT	GTTAAGAGCAAAAAGAGCACTTCAGCTTCCCGATATCCGACGGTAGTGTNNNNNTAGGTCATCTAGGAGTACAAG	180332687	180332885	-	0	1
INF1_smMIP_CCDC39_3	3:180332784-180332935/17,23/+	0.906567	3	180332784	180332800	TAGTGAAGAGGAGGCCG	2	180332913	180332935	AGTATAGACCCTCTCATTATTGG	1	180332801	180332912	GGAATTTAAGCTCCAGTACTTTAATTGAAGACTGAGAAGTAGATGTACTTGTACTCCTAGATGACCTAGAAGAAAAACCAGAATTATAAATTCAATGCAAAGTTTATATTTT	AGTATAGACCCTCTCATTATTGGCTTCAGCTTCCCGATATCCGACGGTAGTGTNNNNNTAGTGAAGAGGAGGCCG	180332687	180332885	+	0	1
INF1_smMIP_CCDC39_4	3:180334007-180334158/17,23/+	0.90007	3	180334007	180334023	CTGGAATCACTTAGTGT	2	180334136	180334158	GTAGTTCTAACCCACTCTGGAGG	1	180334024	180334135	ACAGCTGTGAGAGTTAAGCAGATTTTTTTTTAACCCTCCGCTTACCTTGCTGATAGTGAAGTATGTGAAGGAGATCTAGAGCTCTGACGACTGCCTTTTGTGCTAGCTGTAG	GTAGTTCTAACCCACTCTGGAGGCTTCAGCTTCCCGATATCCGACGGTAGTGTNNNNNCTGGAATCACTTAGTGT	180334047	180334171	+	0	1
INF1_smMIP_CCDC39_5	3:180334085-180334236/16,24/-	0.888288	3	180334221	180334236	ATCATGAAGTGAAAGC	2	180334085	180334108	AGAGCTCTAGATCTCCTTCACATA	1	180334109	180334220	TAATTAAAAATATTTATCTTCTAAAAAACAGTAGGTAGTACTAATGATTGCTATTGAATATTCCTCCAGAGTGGGTTAGAACTACCTACAGCTAGCACAAAAGGCAGTCGTC	AGAGCTCTAGATCTCCTTCACATACTTCAGCTTCCCGATATCCGACGGTAGTGTNNNNNATCATGAAGTGAAAGC	180334047	180334171	-	0	1
INF1_smMIP_CCDC39_6	3:180334168-180334319/17,23/-	0.472634	3	180334303	180334319	AACATACTTTCAACAGG	1	180334168	180334190	GTAGGTAGTACTAATGATTGCTA	1	180334191	180334302	TAATACAGCACCTTCTATTAAATATTTCTTAAAAACTTCATGAAAATAAAAACTTTCATGACATTCATCATGAAGTGAAAGCTAATTAAAAATATTTATCTTCTAAAAAACA	GTAGGTAGTACTAATGATTGCTACTTCAGCTTCCCGATATCCGACGGTAGTGTNNNNNAACATACTTTCAACAGG	180334282	180334503	-	0	1
INF1_smMIP_CCDC39_7	3:180334284-180334435/16,24/+	0.803421	3	180334284	180334299	AATAGAAGGTGCTGTA	3	180334412	180334435	GATGTCTTGTTCTTCCATTGTTTC	1	180334300	180334411	TTACCTGTTGAAAGTATGTTTGAAGGATAATACGGATCTCAGTATTTTCTTCTATGATATCAACTAACATTTCATCAATAACTTTGTGAAACTGTTTCATTTCACGAAGTTT	GATGTCTTGTTCTTCCATTGTTTCCTTCAGCTTCCCGATATCCGACGGTAGTGTNNNNNAATAGAAGGTGCTGTA	180334282	180334503	+	0	1
INF1_smMIP_CCDC39_8	3:180334323-180334474/16,24/-	0.874988	3	180334459	180334474	CTCACAAAGGAAATCC	3	180334323	180334346	AAATACTGAGATCCGTATTATCCT	1	180334347	180334458	GTCTTTTGAAAGACACAAAAGATGAAACAATGGAAGAACAAGACATCAAACTTCGTGAAATGAAACAGTTTCACAAAGTTATTGATGAAATGTTAGTTGATATCATAGAAGA	AAATACTGAGATCCGTATTATCCTCTTCAGCTTCCCGATATCCGACGGTAGTGTNNNNNCTCACAAAGGAAATCC	180334282	180334503	-	0	1
INF1_smMIP_CCDC39_9	3:180334409-180334560/17,23/-	0.781803	3	180334544	180334560	AATCCTCCTTCATCTAT	2	180334409	180334431	CAATGGAAGAACAAGACATCAAA	1	180334432	180334543	TAAAAATATTAAATTCTGGTAAACACGTTTATAGAATAATTGACTATTATTTACCAACAGTGTGCAAAACTCACAAAGGAAATCCGTCTTTTGAAAGACACAAAAGATGAAA	CAATGGAAGAACAAGACATCAAACTTCAGCTTCCCGATATCCGACGGTAGTGTNNNNNAATCCTCCTTCATCTAT	180334282	180334503	-	0	1
INF1_smMIP_CCDC39_10	3:180334553-180334704/16,24/+	0.936696	3	180334553	180334568	GGAGGATTTGGGACTT	2	180334681	180334704	GCCTGCTTCTCTGATAACTTTTCT	1	180334569	180334680	CAAAAATGTAAATATGAAAGGTCAGTTTTTAAAAGATATCGATACCTGTTTGGTCACTCTTTCTAATTTTGGCTTCTGCTCCTCCGTTTCTTTACTTAGTTGAAATGAATAA	GCCTGCTTCTCTGATAACTTTTCTCTTCAGCTTCCCGATATCCGACGGTAGTGTNNNNNGGAGGATTTGGGACTT	180334592	180334774	+	0	1
INF1_smMIP_CCDC39_11	3:180334625-180334776/16,24/+	0.202989	3	180334625	180334640	CTCTTTCTAATTTTGG	15	180334753	180334776	CTCTGTAGAAAAAATATTAACATG	1	180334641	180334752	CTTCTGCTCCTCCGTTTCTTTACTTAGTTGAAATGAATAAGCCTGCTTCTCTGATAACTTTTCTTTAACATTATTTGCCAAATGTTCTATAACATCTAATGTATTTTCCATG	CTCTGTAGAAAAAATATTAACATGCTTCAGCTTCCCGATATCCGACGGTAGTGTNNNNNCTCTTTCTAATTTTGG	180334592	180334774	+	0	20
INF1_smMIP_CCDC39_12	3:180334672-180334823/16,24/-	0.374179	3	180334808	180334823	TTGATAAATGACAAGT	4	180334672	180334695	ATCAGAGAAGCAGGCTTATTCATT	1	180334696	180334807	TATAAAAGTCAATTTCTGATTCTAAAAAATACATGTTAATATTTTTTCTACAGAGCATGGAAAATACATTAGATGTTATAGAACATTTGGCAAATAATGTTAAAGAAAAGTT	ATCAGAGAAGCAGGCTTATTCATTCTTCAGCTTCCCGATATCCGACGGTAGTGTNNNNNTTGATAAATGACAAGT	180334592	180334774	-	0	1
INF1_smMIP_CCDC39_13	3:180336973-180337124/17,23/-	0.869269	3	180337108	180337124	GAAGAACAAAAAAGAGC	2	180336973	180336995	CATTACTGCTACTTCTATTCTCT	1	180336996	180337107	TGTTGATGAAAAATACAGATACAAACAAAGACAAATCAGAGAACTTCAAGAAGACATCCAGGTAAATTCTACAGGCATTTTTAGTAATATGCCTTCAATAAAAGTCAACTAT	CATTACTGCTACTTCTATTCTCTCTTCAGCTTCCCGATATCCGACGGTAGTGTNNNNNGAAGAACAAAAAAGAGC	180337025	180337173	-	0	1
INF1_smMIP_CCDC39_14	3:180337040-180337191/17,23/-	0.567902	3	180337175	180337191	ATGTTGAAATTTTAAAC	3	180337040	180337062	TCAAGAAGACATCCAGGTAAATT	1	180337063	180337174	TAAAAATGTTCTACATTTCAGGTGATGAGTATGAGCTAAAAATTCAACTAGAAGAACAAAAAAGAGCTGTTGATGAAAAATACAGATACAAACAAAGACAAATCAGAGAACT	TCAAGAAGACATCCAGGTAAATTCTTCAGCTTCCCGATATCCGACGGTAGTGTNNNNNATGTTGAAATTTTAAAC	180337025	180337173	-	0	1
INF1_smMIP_CCDC39_15	3:180337523-180337674/18,22/+	0.906988	3	180337523	180337540	CATGTCTCACAGTGTTCC	1	180337653	180337674	GCACTTGAAGGGTATTTTCTAG	1	180337541	180337652	TTTTAACTATACACTCGTCACTGTATATATGTATAAAAAAAAGTTAACTCCTACATACTAGATGGAGTCACTTTTTTAAAAGATTGCTTATAATTGTTGTTACAGCTGTTCA	GCACTTGAAGGGTATTTTCTAGCTTCAGCTTCCCGATATCCGACGGTAGTGTNNNNNCATGTCTCACAGTGTTCC	180337577	180337778	+	0	1
INF1_smMIP_CCDC39_16	3:180337586-180337737/18,22/-	0.882907	3	180337720	180337737	CTTCAAAGGGAAGGTGAC	1	180337586	180337607	CTCCATCTAGTATGTAGGAGTT	1	180337608	180337719	TGTTTGGATGCCAAGATCAACAAAGCTGAAAAAGAAATCTACGCTCTAGAAAATACCCTTCAAGTGCTGAACAGCTGTAACAACAATTATAAGCAATCTTTTAAAAAAGTGA	CTCCATCTAGTATGTAGGAGTTCTTCAGCTTCCCGATATCCGACGGTAGTGTNNNNNCTTCAAAGGGAAGGTGAC	180337577	180337778	-	0	1
INF1_smMIP_CCDC39_17	3:180337679-180337830/17,23/-	0.924766	3	180337814	180337830	AAAGACAGCCATTAGGC	1	180337679	180337701	AACAAAGCTGAAAAAGAAATCTA	1	180337702	180337813	ATTTCTTCCCATAGTAAATGCTTTTATTCAACCAGTTCTATTCTGTACTTCATAGGCTGCTCAAGAAAAAGAAGAACTTCAAAGGGAAGGTGACTGTTTGGATGCCAAGATC	AACAAAGCTGAAAAAGAAATCTACTTCAGCTTCCCGATATCCGACGGTAGTGTNNNNNAAAGACAGCCATTAGGC	180337577	180337778	-	0	1
INF1_smMIP_CCDC39_18	3:180349207-180349358/16,24/-	0.726692	3	180349343	180349358	AGTAAAATTGAGAAGC	3	180349207	180349230	ATGGTATGAAATTTTCTTTGTTAA	1	180349231	180349342	TGAAGAATAGATATGAAATTCTGACTGTTGTTATGCTGCCTCCTGAAGGAGAAGAGGAGAAAACACAGGCCTATTATGTAATAAAGGTAATTTTAATTGATTCACAGTTGTG	ATGGTATGAAATTTTCTTTGTTAACTTCAGCTTCCCGATATCCGACGGTAGTGTNNNNNAGTAAAATTGAGAAGC	180349235	180349400	-	0	1
INF1_smMIP_CCDC39_19	3:180349266-180349417/16,24/-	0.730311	3	180349402	180349417	ATGTTATTCATTTCTC	9	180349266	180349289	GAGGAGAAAACACAGGCCTATTAT	1	180349290	180349401	AGTGTTTCTTTTTCTTATTAGCACTGAGTTTCGCGAGCGGCTAAGTAAAATTGAGAAGCTGAAGAATAGATATGAAATTCTGACTGTTGTTATGCTGCCTCCTGAAGGAGAA	GAGGAGAAAACACAGGCCTATTATCTTCAGCTTCCCGATATCCGACGGTAGTGTNNNNNATGTTATTCATTTCTC	180349235	180349400	-	0	1
INF1_smMIP_CCDC39_20	3:180359726-180359877/22,18/+	0.927336	3	180359726	180359747	TCCTGACATCATCCTGTTTTTT	1	180359860	180359877	GCTCTTCCATTGCTGTGT	1	180359748	180359859	TAATTCCTCAGCAGTTTTAAAACTGAAAATTACCTTATGTTTTCCCGTTCTTGATCAACATATCTTATTTGTGACGCAAGCATTGTTTTATGAACCTTGATTTCTTCAGTTC	GCTCTTCCATTGCTGTGTCTTCAGCTTCCCGATATCCGACGGTAGTGTNNNNNTCCTGACATCATCCTGTTTTTT	180359759	180360009	+	0	1
INF1_smMIP_CCDC39_21	3:180359811-180359962/17,23/+	0.864656	3	180359811	180359827	CTTATTTGTGACGCAAG	1	180359940	180359962	CGAGTACGCTTAACTTCAAGTTT	1	180359828	180359939	CATTGTTTTATGAACCTTGATTTCTTCAGTTCGCTCTTCCATTGCTGTGTATAATTGCTGTTTTCTTTTTTCTAGGGAAAGAACTTCTTCTGCCTTACTGTGAAGCATTTCT	CGAGTACGCTTAACTTCAAGTTTCTTCAGCTTCCCGATATCCGACGGTAGTGTNNNNNCTTATTTGTGACGCAAG	180359759	180360009	+	0	1
INF1_smMIP_CCDC39_22	3:180359864-180360015/22,18/-	0.750657	3	180359994	180360015	ATTTGACCATTTTGTTACGTTG	1	180359864	180359881	TTATACACAGCAATGGAA	1	180359882	180359993	ATAGGATTTGATGATAGAGGACAATCTTTTAAAACTTGAAGTTAAGCGTACTCGAGAAATGCTTCACAGTAAGGCAGAAGAAGTTCTTTCCCTAGAAAAAAGAAAACAGCAA	TTATACACAGCAATGGAACTTCAGCTTCCCGATATCCGACGGTAGTGTNNNNNATTTGACCATTTTGTTACGTTG	180359759	180360009	-	0	20
INF1_smMIP_CCDC39_23	3:180359973-180360124/19,21/-	0.277545	3	180360106	180360124	CCTAGCTAATATCTTAGTC	1	180359973	180359993	ATAGGATTTGATGATAGAGGA	1	180359994	180360105	AATGGTTAAATTGGAAAAAGGTATATTTTCAAGTTTTACTTATATAGCAATAAAAAAAATTTTGGTTTTGCAATTAAAAATAATTTCAATATTTGACCATTTTGTTACGTTG	ATAGGATTTGATGATAGAGGACTTCAGCTTCCCGATATCCGACGGTAGTGTNNNNNCCTAGCTAATATCTTAGTC	180359759	180360009	-	0	1
INF1_smMIP_CCDC39_24	3:180361849-180362000/19,21/+	0.820176	3	180361849	180361867	CTACAATTAACATGGAAAC	1	180361980	180362000	GGTCATAAGGGACTGTTTTTC	1	180361868	180361979	ATGGTTTTCAATACTACATATGCATACAATTTTACTGCACCTGCTTAAAACCTTTGGCTTTATCAAGTTCTTTCTCTGATCTGTCGATGAAAAGGTTTAGTTCATTTATTTT	GGTCATAAGGGACTGTTTTTCCTTCAGCTTCCCGATATCCGACGGTAGTGTNNNNNCTACAATTAACATGGAAAC	180361886	180362065	+	0	1
INF1_smMIP_CCDC39_25	3:180361873-180362024/18,22/-	0.767096	3	180362007	180362024	AAGGCACATAGTAAAAAC	1	180361873	180361894	GTATGCATATGTAGTATTGAAA	1	180361895	180362006	AGTGATGAAAAACAGTCCCTTATGACCAAAATAAATGAACTAAACCTTTTCATCGACAGATCAGAGAAAGAACTTGATAAAGCCAAAGGTTTTAAGCAGGTGCAGTAAAATT	GTATGCATATGTAGTATTGAAACTTCAGCTTCCCGATATCCGACGGTAGTGTNNNNNAAGGCACATAGTAAAAAC	180361886	180362065	-	0	10
INF1_smMIP_CCDC39_26	3:180361971-180362122/16,24/-	0.397842	3	180362107	180362122	TATATAATACAGCATG	9	180361971	180361994	CAGTCCCTTATGACCAAAATAAAT	1	180361995	180362106	TATTTAATATTTTTGTCAATATTTAAAACATACATTTATATACCTTTTTTCTTTTTTGCAGAATGATCTTTATTTTATCAAGAAGGCACATAGTAAAAACAGTGATGAAAAA	CAGTCCCTTATGACCAAAATAAATCTTCAGCTTCCCGATATCCGACGGTAGTGTNNNNNTATATAATACAGCATG	180361886	180362065	-	0	1
INF1_smMIP_CCDC39_27	3:180364807-180364958/18,22/-	0.785725	3	180364941	180364958	CGCTTGAAGCAAAAATTG	1	180364807	180364828	TAGTCATTCTGTTTTAGGACAA	1	180364829	180364940	TTGAACTTAGGAAGTCTTTGGAAGAGAAAAAATCTACATGTGGCCTTTTGGAAACACAGATCAAGAAGCTTCATGTAACTTAGCCAAAATACATTTTATATTTCAAATATCC	TAGTCATTCTGTTTTAGGACAACTTCAGCTTCCCGATATCCGACGGTAGTGTNNNNNCGCTTGAAGCAAAAATTG	180364845	180365051	-	0	1
INF1_smMIP_CCDC39_28	3:180364879-180365030/18,22/-	0.697202	3	180365013	180365030	ATTTTCACATTCAACAAG	1	180364879	180364900	TGGCCTTTTGGAAACACAGATC	1	180364901	180365012	TGGAACGGAGAATGTCACGGTTAAAGGGAGAAATTAATTCAGAAGAAAAACAAGCGCTTGAAGCAAAAATTGTTGAACTTAGGAAGTCTTTGGAAGAGAAAAAATCTACATG	TGGCCTTTTGGAAACACAGATCCTTCAGCTTCCCGATATCCGACGGTAGTGTNNNNNATTTTCACATTCAACAAG	180364845	180365051	-	0	1
INF1_smMIP_CCDC39_29	3:180364980-180365131/16,24/+	0.91471	3	180364980	180364995	TTTCTCCCTTTAACCG	1	180365108	180365131	CTTTCTTATGACTTTGGACTAGGC	1	180364996	180365107	TGACATTCTCCGTTCCACTTGTTGAATGTGAAAATCCTGTTACAGTTTAAAAAAAAAAAGGTATTACAAAGAAAAAAAAAGCATTTCTACAAGTGTAAAAACAAAGTGAATA	CTTTCTTATGACTTTGGACTAGGCCTTCAGCTTCCCGATATCCGACGGTAGTGTNNNNNTTTCTCCCTTTAACCG	180364845	180365051	+	0	1
INF1_smMIP_CCDC39_30	3:180365894-180366045/19,21/+	0.89972	3	180365894	180365912	CTTGACCATCACAACTGTA	1	180366025	180366045	CAGAGAGGAACGAGTTCCTTC	1	180365913	180366024	ATAAATCAATATGGAAGATATTCATAAAAGTAACATCTACCTGGCTGTACATAATTTCTTGCTGCTTCAAGGTTTCAAAATCCAGTTTTTGTAACTGATGGTTGAGATGTTT	CAGAGAGGAACGAGTTCCTTCCTTCAGCTTCCCGATATCCGACGGTAGTGTNNNNNCTTGACCATCACAACTGTA	180365931	180366167	+	0	1
INF1_smMIP_CCDC39_31	3:180366007-180366158/16,24/+	0.873359	3	180366007	180366022	CTGATGGTTGAGATGT	2	180366135	180366158	GAACATCTACTTCCTGATAATGAG	1	180366023	180366134	TTCAGAGAGGAACGAGTTCCTTCAATTTCTGATAAAACAGCTTTTTCTTTCATTGTCTCAGTCTGTAACTCCTGAGCTTTCTTAAACAGCACACCTTTTATGAGGTTCAGTT	GAACATCTACTTCCTGATAATGAGCTTCAGCTTCCCGATATCCGACGGTAGTGTNNNNNCTGATGGTTGAGATGT	180365931	180366167	+	0	1
INF1_smMIP_CCDC39_32	3:180366095-180366246/18,22/-	0.579326	3	180366229	180366246	AGGGTTCAAATTTATTTG	1	180366095	180366116	GTGTGCTGTTTAAGAAAGCTCA	1	180366117	180366228	AGTTTCTAAATTATTATGTTCATATAAATACAACATTTCAATATATTTAATTCCATTAATCACTATAATTCTCATTATCAGGAAGTAGATGTTCAACTGAACCTCATAAAAG	GTGTGCTGTTTAAGAAAGCTCACTTCAGCTTCCCGATATCCGACGGTAGTGTNNNNNAGGGTTCAAATTTATTTG	180365931	180366167	-	0	1
INF1_smMIP_CCDC39_33	3:180369110-180369261/22,18/-	0.849294	3	180369240	180369261	GAAAACCATGTCTGTAGAAGAG	1	180369110	180369127	GACTCCTAGGATCAGAGG	1	180369128	180369239	AAAGCTACTAATTTGGAAGATATGCTAAAGGAGGAGGAAAAAGATGTGAAGGTAAAGTTTAGTTTTAATTTTTCTTTAAATCACAGAAAATTTAGCAACAGTGAATTAATTA	GACTCCTAGGATCAGAGGCTTCAGCTTCCCGATATCCGACGGTAGTGTNNNNNGAAAACCATGTCTGTAGAAGAG	180369167	180369341	-	0	1
INF1_smMIP_CCDC39_34	3:180369221-180369372/16,24/+	0.672814	3	180369221	180369236	CTTCCAAATTAGTAGC	2	180369349	180369372	GAAAACGTGCCTAAAAAGCATTTC	1	180369237	180369348	TTTCTCTTCTACAGACATGGTTTTCTCAGTTATCTCCTTTAATTTTGTTTGTATTATCTCATTATGATTTTTAGTTTTTTGTAACCTGAAGAGGGTTTATCACAAAAAGATA	GAAAACGTGCCTAAAAAGCATTTCCTTCAGCTTCCCGATATCCGACGGTAGTGTNNNNNCTTCCAAATTAGTAGC	180369167	180369341	+	0	1
INF1_smMIP_CCDC39_35	3:180369864-180370015/18,22/-	0.417802	3	180369998	180370015	GATTTAGAAGCTCTGAGG	1	180369864	180369885	ACTTAAGACTATTTGTTGTTTA	1	180369886	180369997	AAAAATATTTCCAAGATAAAGAAGGACATTCATGAAGAAACAGCAAGGTAAGAAAAAAACTATCTAAATATGTTTATGATTATTTTTTACTATATCTAGAAAATTATTAAAT	ACTTAAGACTATTTGTTGTTTACTTCAGCTTCCCGATATCCGACGGTAGTGTNNNNNGATTTAGAAGCTCTGAGG	180369929	180370074	-	0	20
INF1_smMIP_CCDC39_36	3:180369934-180370085/16,24/-	0.53873	3	180370070	180370085	ATATAATTTCTGTCTG	8	180369934	180369957	CAGCAAGGTAAGAAAAAAACTATC	1	180369958	180370069	TTAACTAATAAATAGCTGGATTCTTTAAAAGCCACTGTGAATAGAACTTCCAGTGATTTAGAAGCTCTGAGGAAAAATATTTCCAAGATAAAGAAGGACATTCATGAAGAAA	CAGCAAGGTAAGAAAAAAACTATCCTTCAGCTTCCCGATATCCGACGGTAGTGTNNNNNATATAATTTCTGTCTG	180369929	180370074	-	0	1
INF1_smMIP_CCDC39_37	3:180370023-180370174/22,18/-	0.891929	3	180370153	180370174	ACTACTTTTGTGGGTGTGATGT	1	180370023	180370040	AGCCACTGTGAATAGAAC	2	180370041	180370152	AGGTTAGAACTTAAAGTGGGCAGAATAAAACTCAGAAATGAAATAAGTTATAAGATACAGAGTAAATATATAATTTCTGTCTGTTAACTAATAAATAGCTGGATTCTTTAAA	AGCCACTGTGAATAGAACCTTCAGCTTCCCGATATCCGACGGTAGTGTNNNNNACTACTTTTGTGGGTGTGATGT	180369929	180370074	-	0	1
INF1_smMIP_CCDC39_38	3:180372509-180372660/19,21/+	0.821914	3	180372509	180372527	TGTCGTGAACATACAAGCC	1	180372640	180372660	CTCAAACTCTGTGTTATTCCC	1	180372528	180372639	AGTCTTTTTTGAGTTGACATACCTCACCCTTCAGCTGAATTCTACTAGTTTCATGGTCCTGATATGCCGTTCTACATTTTAAAAGTTTACGATCAGCCACAGAAATTCTTTT	CTCAAACTCTGTGTTATTCCCCTTCAGCTTCCCGATATCCGACGGTAGTGTNNNNNTGTCGTGAACATACAAGCC	180372528	180372761	+	0	1
INF1_smMIP_CCDC39_39	3:180372583-180372734/17,23/+	0.892756	3	180372583	180372599	GTCCTGATATGCCGTTC	1	180372712	180372734	TCTCGTTTCCTGCTTTATCCTTG	1	180372600	180372711	TACATTTTAAAAGTTTACGATCAGCCACAGAAATTCTTTTCTCAAACTCTGTGTTATTCCCAATCTCACTTTCCAAAAACTTGATCTTTTCTTTAACCAAATTTTCTTTTTC	TCTCGTTTCCTGCTTTATCCTTGCTTCAGCTTCCCGATATCCGACGGTAGTGTNNNNNGTCCTGATATGCCGTTC	180372528	180372761	+	0	1
INF1_smMIP_CCDC39_40	3:180372641-180372792/16,24/-	0.31408	3	180372777	180372792	TTTTCTCAGTTTAAAC	14	180372641	180372664	GATTGGGAATAACACAGAGTTTGA	1	180372665	180372776	ATATATTTAAGTAAACATATTTGTTTTAATCCTAGGAATTAGCAAGGATAAAGCAGGAAACGAGAGAAAAAGAAAATTTGGTTAAAGAAAAGATCAAGTTTTTGGAAAGTGA	GATTGGGAATAACACAGAGTTTGACTTCAGCTTCCCGATATCCGACGGTAGTGTNNNNNTTTTCTCAGTTTAAAC	180372528	180372761	-	0	1
INF1_smMIP_CCDC39_41	3:180377201-180377352/16,24/-	0.896686	3	180377337	180377352	CAGCACAAGATTTTCG	1	180377201	180377224	GGTCCTTGTAATGTTCAGCTGCAT	1	180377225	180377336	TAAGATTCATAATGAAAGACAAGAACTCATTAAACAATGGGAGAACACAATAGAACAGATGCAGAAGAGGGATGGAGACATAGATAACTGTGCTTTGGTAAAGTAGTTGTTT	GGTCCTTGTAATGTTCAGCTGCATCTTCAGCTTCCCGATATCCGACGGTAGTGTNNNNNCAGCACAAGATTTTCG	180377218	180377577	-	0	1
INF1_smMIP_CCDC39_42	3:180377203-180377354/16,24/+	0.802302	3	180377203	180377218	GCAGCTGAACATTACA	1	180377331	180377354	ATCTTACGAAAATCTTGTGCTGCT	1	180377219	180377330	AGGACCAAACAACTACTTTACCAAAGCACAGTTATCTATGTCTCCATCCCTCTTCTGCATCTGTTCTATTGTGTTCTCCCATTGTTTAATGAGTTCTTGTCTTTCATTATGA	ATCTTACGAAAATCTTGTGCTGCTCTTCAGCTTCCCGATATCCGACGGTAGTGTNNNNNGCAGCTGAACATTACA	180377218	180377577	+	0	1
INF1_smMIP_CCDC39_43	3:180377277-180377428/19,21/-	0.891089	3	180377410	180377428	AGGTGATGTTTGCAAAACC	1	180377277	180377297	GGAGAACACAATAGAACAGAT	1	180377298	180377409	ACTTAAATTCACAGAAATGTTCTTTGCTCTCTGTTTGACAGTTAGAATTGGATAAAGCAGCACAAGATTTTCGTAAGATTCATAATGAAAGACAAGAACTCATTAAACAATG	GGAGAACACAATAGAACAGATCTTCAGCTTCCCGATATCCGACGGTAGTGTNNNNNAGGTGATGTTTGCAAAACC	180377218	180377577	-	0	1
INF1_smMIP_CCDC39_44	3:180377359-180377510/17,23/+	0.796363	3	180377359	180377375	CCAATTCTAACTGTCAA	1	180377488	180377510	GTTCGTTGTCAAGTATCTTTCTT	1	180377376	180377487	ACAGAGAGCAAAGAACATTTCTGTGAATTTAAGTGGTTTTGCAAACATCACCTTGAAAATTAAGAAATAAAAATCTTCCTTAAACTAACCTGTGCGCTTATAGTCTCTGTAA	GTTCGTTGTCAAGTATCTTTCTTCTTCAGCTTCCCGATATCCGACGGTAGTGTNNNNNCCAATTCTAACTGTCAA	180377218	180377577	+	0	1
INF1_smMIP_CCDC39_45	3:180377450-180377601/16,24/+	0.403786	3	180377450	180377465	CTTCCTTAAACTAACC	2	180377578	180377601	GATACTTATAATTCTCATTCTATT	1	180377466	180377577	TGTGCGCTTATAGTCTCTGTAAGTTCGTTGTCAAGTATCTTTCTTTTCTGATTACATTCCAAAGTTAGTCTTTCTAATTGCAGAGTCAGTGCCTATGATGTAATTATATACA	GATACTTATAATTCTCATTCTATTCTTCAGCTTCCCGATATCCGACGGTAGTGTNNNNNCTTCCTTAAACTAACC	180377218	180377577	+	0	20
INF1_smMIP_CCDC39_46	3:180377480-180377631/21,19/-	0.412331	3	180377611	180377631	AATGTTAGATACACTAATAAC	1	180377480	180377498	TGACAACGAACTTACAGAG	1	180377499	180377610	ATTTAAATTAATAGAATGAGAATTATAAGTATCTGTATATAATTACATCATAGGCACTGACTCTGCAATTAGAAAGACTAACTTTGGAATGTAATCAGAAAAGAAAGATACT	TGACAACGAACTTACAGAGCTTCAGCTTCCCGATATCCGACGGTAGTGTNNNNNAATGTTAGATACACTAATAAC	180377218	180377577	-	0	1
INF1_smMIP_CCDC39_47	3:180378320-180378471/17,23/+	0.96351	3	180378320	180378336	TAGAGAAAACCTAACAG	1	180378449	180378471	GCTTGCTGGTCCCAGTTCATTTG	1	180378337	180378448	TTACAATTTGTAATTTCTCACCCTGATTTTATTATCATCTTGTTGTGCATACTTCTGGAGAGTGAGAGCATCACTATCTTTATGAGCTGATTCTTCTAACCAGGCCTCCAAT	GCTTGCTGGTCCCAGTTCATTTGCTTCAGCTTCCCGATATCCGACGGTAGTGTNNNNNTAGAGAAAACCTAACAG	180378336	180378536	+	0	1
INF1_smMIP_CCDC39_48	3:180378375-180378526/16,24/-	0.870457	3	180378511	180378526	TGGAAATTAGAATGGC	3	180378375	180378398	CTCTCCAGAAGTATGCACAACAAG	1	180378399	180378510	ATATTTAAAGCCACTCAAAAATTGGATGGTTTGAAATGTCAAATGAACTGGGACCAGCAAGCATTGGAGGCCTGGTTAGAAGAATCAGCTCATAAAGATAGTGATGCTCTCA	CTCTCCAGAAGTATGCACAACAAGCTTCAGCTTCCCGATATCCGACGGTAGTGTNNNNNTGGAAATTAGAATGGC	180378336	180378536	-	0	1
INF1_smMIP_CCDC39_49	3:180378493-180378644/16,24/+	0.903708	3	180378493	180378508	TTGAGTGGCTTTAAAT	8	180378621	180378644	GAGGAAATCCTGTCCCTGCCTTCC	1	180378509	180378620	ATGCCATTCTAATTTCCAAAGAGAGAGAGAAAAGGGGAGATTACAAAACATTACTTACTATACAGACTAAAATAAAACATACCTTTATATACTATGGAGCAAAATTAAAAAT	GAGGAAATCCTGTCCCTGCCTTCCCTTCAGCTTCCCGATATCCGACGGTAGTGTNNNNNTTGAGTGGCTTTAAAT	180378336	180378536	+	0	1
INF1_smMIP_CCDC39_50	3:180379580-180379731/17,23/-	0.917163	3	180379715	180379731	GAGAATTGGGACGAGTG	1	180379580	180379602	TCCATCACCAAATGAGCATTGAC	1	180379603	180379714	AAAGATGAAATTCAACGGCTGGAAAATGAGATGGCTTCAATACTGGAAAAGAAAAGTGATAAAGAAGTATATGTTGAAATATTACTTAAAATTCTGTGCTACTGCTCATTCT	TCCATCACCAAATGAGCATTGACCTTCAGCTTCCCGATATCCGACGGTAGTGTNNNNNGAGAATTGGGACGAGTG	180379627	180379815	-	0	1
INF1_smMIP_CCDC39_51	3:180379651-180379802/16,24/-	0.871452	3	180379787	180379802	TCTGTAGTCTCTTTGC	9	180379651	180379674	TACTGGAAAAGAAAAGTGATAAAG	1	180379675	180379786	AAAGCAAGGGAGCGTGAGACTGAAAGTGAAGAACATTTTAAGGCCATTGCTCAAAGAGAATTGGGACGAGTGAAAGATGAAATTCAACGGCTGGAAAATGAGATGGCTTCAA	TACTGGAAAAGAAAAGTGATAAAGCTTCAGCTTCCCGATATCCGACGGTAGTGTNNNNNTCTGTAGTCTCTTTGC	180379627	180379815	-	0	1
INF1_smMIP_CCDC39_52	3:180379747-180379898/17,23/-	0.680272	3	180379882	180379898	AATTTATGGGAACTTTG	1	180379747	180379769	GACTGAAAGTGAAGAACATTTTA	1	180379770	180379881	TTTTAATCTAATGGATTATTATAAATATTTGTATTCAAAATTTCTAAAATTTTAAAAGCCTTTTTATCTTGTGTGTTATTCTGTAGTCTCTTTGCAAAGCAAGGGAGCGTGA	GACTGAAAGTGAAGAACATTTTACTTCAGCTTCCCGATATCCGACGGTAGTGTNNNNNAATTTATGGGAACTTTG	180379627	180379815	-	0	1
INF1_smMIP_CCDC39_53	3:180381611-180381762/18,22/+	0.900024	3	180381611	180381628	CCATGACTACACGATATA	1	180381741	180381762	GCAAGCTTGCTCTTTCATCCTT	1	180381629	180381740	ATCAACATAAATTTCAGTTACTGTACCTGTGTAATTGAGAGCTCTTGCTTAACATTTTTGAAGTGAGAAGTCATAGAATTAATTCGCTCTTCATACTCACGTAACTCATCTT	GCAAGCTTGCTCTTTCATCCTTCTTCAGCTTCCCGATATCCGACGGTAGTGTNNNNNCCATGACTACACGATATA	180381633	180381794	+	0	1
INF1_smMIP_CCDC39_54	3:180381657-180381808/19,21/-	0.666981	3	180381790	180381808	GACTTTGGTTAATCATAGT	2	180381657	180381677	AGCAAGAGCTCTCAATTACAC	1	180381678	180381789	ATTTATTATTTACAGTTGTCAAAGCTGAAGGATGAAAGAGCAAGCTTGCAAGATGAGTTACGTGAGTATGAAGAGCGAATTAATTCTATGACTTCTCACTTCAAAAATGTTA	AGCAAGAGCTCTCAATTACACCTTCAGCTTCCCGATATCCGACGGTAGTGTNNNNNGACTTTGGTTAATCATAGT	180381633	180381794	-	0	1
INF1_smMIP_CCDC39_55	3:180381730-180381881/16,24/-	0.817687	3	180381866	180381881	ATTGACTAAGACAATG	5	180381730	180381753	AGAGCAAGCTTGCAAGATGAGTTA	1	180381754	180381865	TAAATGAAAATTTAATTTTCTTTGATTTTAGGTCCTTCATATGGTAAAACTTAATAGGACTTTGGTTAATCATAGTATTTATTATTTACAGTTGTCAAAGCTGAAGGATGAA	AGAGCAAGCTTGCAAGATGAGTTACTTCAGCTTCCCGATATCCGACGGTAGTGTNNNNNATTGACTAAGACAATG	180381633	180381794	-	0	1
INF1_smMIP_CCDC39_56	3:180396975-180397126/22,18/-	0.852789	3	180397105	180397126	TTCGCCATCCCGGTGGCGAACG	1	180396975	180396992	TTTCTCTCCTTTCCTAAT	3	180396993	180397104	AGGAGAACAAGCTACTGGAAGATCAGGTGAGATCAATTGAAGCAGGCGGGAGGAAGCAGAGAGAGCCTGTTGGGGGCGTTTTCTGGTTGGCAGTACTACCCCAGCCCTTTTA	TTTCTCTCCTTTCCTAATCTTCAGCTTCCCGATATCCGACGGTAGTGTNNNNNTTCGCCATCCCGGTGGCGAACG	180397057	180397188	-	0	20
INF1_smMIP_CCDC39_57	3:180397070-180397221/18,22/-	0.883874	3	180397204	180397221	GCTGTACAAGAAGGCGGA	1	180397070	180397091	ACTGGAAGATCAGGTGAGATCA	1	180397092	180397203	TCTTTGCTCTGTATCTTCTCTATCCGTTTGCAGTCATGAGTAGCGAATTCCTGGCTGAGCTGCACTGGGAGGATGGGTTCGCCATCCCGGTGGCGAACGAGGAGAACAAGCT	ACTGGAAGATCAGGTGAGATCACTTCAGCTTCCCGATATCCGACGGTAGTGTNNNNNGCTGTACAAGAAGGCGGA	180397057	180397188	-	0	1
INF1_smMIP_DNAH1_1	3:52356395-52356546/18,22/+	0.859204	3	52356395	52356412	GGGCTGACTGACGCTGGG	1	52356525	52356546	GCTCCTGCAGTCCAAGTGGGGA	1	52356413	52356524	TTCTTCTCCTAGGAGCTTCGGCTGGGGCATCTCCCTGAGAAGCAGCATGGAGCAGCCTAACAGTAAAGGCTATAGCCTGGGAAGGACCCCTCAGGGCCCAGAGTGCAGCAGT	GCTCCTGCAGTCCAAGTGGGGACTTCAGCTTCCCGATATCCGACGGTAGTGTNNNNNGGGCTGACTGACGCTGGG	52356437	52356811	+	0	1
INF1_smMIP_DNAH1_2	3:52356416-52356567/16,24/-	0.86018	3	52356552	52356567	TATACTCTAGGCCCCT	1	52356416	52356439	CCCCAGCCGAAGCTCCTAGGAGAA	1	52356440	52356551	GTGGGTCCCCACTTGGACTGCAGGAGCACTGCTGCACTCTGGGCCCTGAGGGGTCCTTCCCAGGCTATAGCCTTTACTGTTAGGCTGCTCCATGCTGCTTCTCAGGGAGATG	CCCCAGCCGAAGCTCCTAGGAGAACTTCAGCTTCCCGATATCCGACGGTAGTGTNNNNNTATACTCTAGGCCCCT	52356437	52356811	-	0	1
INF1_smMIP_DNAH1_3	3:52356517-52356668/20,20/-	0.830463	3	52356649	52356668	TGTGGGTGGGGCCGGGGGCA	1	52356517	52356536	GACTGCAGGAGCACTGCTGC	1	52356537	52356648	GGGGTAAATGTGGGAGCTTGGGGTCAAGGGCTGGAGGATTTCCCAACCCATAGTCTGATCCTGGAAGAATCTTCCCCGGGTTATACTCTAGGCCCCTGTGGGTCCCCACTTG	GACTGCAGGAGCACTGCTGCCTTCAGCTTCCCGATATCCGACGGTAGTGTNNNNNTGTGGGTGGGGCCGGGGGCA	52356437	52356811	-	0	1
INF1_smMIP_DNAH1_4	3:52356625-52356776/16,24/-	0.791024	3	52356761	52356776	GGTTCCAGGGCTGAGG	8	52356625	52356648	GGGGTAAATGTGGGAGCTTGGGGT	1	52356649	52356760	ATGTCGGAGTAGAACCCACGCTGCTTCATCAGCGGGTACTTCTTATCAGTGCCTGTCAGGGGTGACTTCCGTGGCTGCCCCAAGTCTGAGAGTGTGGGTGGGGCCGGGGGCA	GGGGTAAATGTGGGAGCTTGGGGTCTTCAGCTTCCCGATATCCGACGGTAGTGTNNNNNGGTTCCAGGGCTGAGG	52356437	52356811	-	0	1
INF1_smMIP_DNAH1_5	3:52356688-52356839/20,20/-	0.820711	3	52356820	52356839	GCCCAGAGGAAGGGTTGAGG	1	52356688	52356707	TGTCAGGGGTGACTTCCGTG	1	52356708	52356819	CTTGGTAGGGGATGGCTGCCATACTCACCCCAAGTTGATCTAAGGTTCCAGGGCTGAGGATGTCGGAGTAGAACCCACGCTGCTTCATCAGCGGGTACTTCTTATCAGTGCC	TGTCAGGGGTGACTTCCGTGCTTCAGCTTCCCGATATCCGACGGTAGTGTNNNNNGCCCAGAGGAAGGGTTGAGG	52356437	52356811	-	0	1
INF1_smMIP_DNAH1_6	3:52357784-52357935/21,19/-	0.851147	3	52357915	52357935	CTACCGGGACCCACTCACACA	1	52357784	52357802	CTGAGTATGTGTCAACCTC	1	52357803	52357914	GCCCTCCTGAGCACTGACCTCTTGGGGTGAACTTGTCAAGGTCAGCCTGCCGCAGGAGGTTCTGGCTCATTCGGGGGCCACGACATACCTCCTGAAACCAAACCATGGAGCC	CTGAGTATGTGTCAACCTCCTTCAGCTTCCCGATATCCGACGGTAGTGTNNNNNCTACCGGGACCCACTCACACA	52357802	52357916	-	0	1
INF1_smMIP_DNAH1_7	3:52357816-52357967/22,18/+	0.906377	3	52357816	52357837	GGTTTCAGGAGGTATGTCGTGG	1	52357950	52357967	GCTTTTGGCCTCAGGGAG	1	52357838	52357949	CCCCCGAATGAGCCAGAACCTCCTGCGGCAGGCTGACCTTGACAAGTTCACCCCAAGAGGTCAGTGCTCAGGAGGGCTGTGTGAGTGGGTCCCGGTAGGTATTTCAAAGCAG	GCTTTTGGCCTCAGGGAGCTTCAGCTTCCCGATATCCGACGGTAGTGTNNNNNGGTTTCAGGAGGTATGTCGTGG	52357802	52357916	+	0	1
INF1_smMIP_DNAH1_8	3:52360095-52360246/22,18/-	0.838078	3	52360225	52360246	AAGTCAGTCTGGGCGAGCAGCC	1	52360095	52360112	CACCCAAAAACCAGCCTC	3	52360113	52360224	GGGTGGTGGACCCGATGCACTGCTGCTCCATGCGCTCCTGGAAGTCTTCAGGAACCTCAAAGCTTCCGACTGCAGGTAGAAGCAGGGGCAGGGGCTTCAGGGCTCAGGCCAG	CACCCAAAAACCAGCCTCCTTCAGCTTCCCGATATCCGACGGTAGTGTNNNNNAAGTCAGTCTGGGCGAGCAGCC	52360134	52360350	-	0	1
INF1_smMIP_DNAH1_9	3:52360194-52360345/18,22/-	0.737901	3	52360328	52360345	CCCACCCAGCCGTACCTC	1	52360194	52360215	ACCCGATGCACTGCTGCTCCAT	1	52360216	52360327	TCGATCTCAATCTTGCGAGGATGCTGGCCTGGCAGCACCTGGAAAGGCACCTGCATCTTGGGCTCGTAGGCCTGCAGTGGGAAGTCAGTCTGGGCGAGCAGCCGGGTGGTGG	ACCCGATGCACTGCTGCTCCATCTTCAGCTTCCCGATATCCGACGGTAGTGTNNNNNCCCACCCAGCCGTACCTC	52360134	52360350	-	0	1
INF1_smMIP_DNAH1_10	3:52360265-52360416/16,24/-	0.778407	3	52360401	52360416	TCACCTGGTGATCTGC	6	52360265	52360288	TGGAAAGGCACCTGCATCTTGGGC	1	52360289	52360400	AGTTCCTCATCCCCTGAGGCGGGTGGATGCCACCTCCCCGACAGTCTCCCCACAGCCCACCCAGCCGTACCTCTCGATCTCAATCTTGCGAGGATGCTGGCCTGGCAGCACC	TGGAAAGGCACCTGCATCTTGGGCCTTCAGCTTCCCGATATCCGACGGTAGTGTNNNNNTCACCTGGTGATCTGC	52360134	52360350	-	0	20
INF1_smMIP_DNAH1_11	3:52360706-52360857/21,19/-	0.763263	3	52360837	52360857	TTTGGGGGTGCTGGTGGTCCA	1	52360706	52360724	AGGATGGCTTGGCTCGTGT	1	52360725	52360836	GGTGCCTGGGCATGAGCTTGTTGGAGTCGATGCCCTGGCTGAACAGCAACTGCTCAATGTCCAGGCTCAGGTACTGCTGTTTCCTCCTGGTCAAGGGCAGGGAGGGGACCTC	AGGATGGCTTGGCTCGTGTCTTCAGCTTCCCGATATCCGACGGTAGTGTNNNNNTTTGGGGGTGCTGGTGGTCCA	52360729	52360927	-	0	1
INF1_smMIP_DNAH1_12	3:52360726-52360877/16,24/-	0.753798	3	52360862	52360877	GTCATGGCCCTGTTCG	1	52360726	52360749	TGGTCAAGGGCAGGGAGGGGACCT	1	52360750	52360861	ATGGTTTGGGGGTGCTGGTGGTCCAGGTGCCTGGGCATGAGCTTGTTGGAGTCGATGCCCTGGCTGAACAGCAACTGCTCAATGTCCAGGCTCAGGTACTGCTGTTTCCTCC	TGGTCAAGGGCAGGGAGGGGACCTCTTCAGCTTCCCGATATCCGACGGTAGTGTNNNNNGTCATGGCCCTGTTCG	52360729	52360927	-	0	1
INF1_smMIP_DNAH1_13	3:52360846-52360997/16,24/+	0.77364	3	52360846	52360861	AGCACCCCCAAACCAT	2	52360974	52360997	GGAGTCAGATCTGAAAGGGGATTC	1	52360862	52360973	CGAACAGGGCCATGACCCAATCTTCCCCATCTACCTCCCACTGAAGGTGAGCCGGGCTTCCACAGATGGTTGAGAGACAGGGGCAGAAGTGCAGGACCCCAGTGGACGCTCA	GGAGTCAGATCTGAAAGGGGATTCCTTCAGCTTCCCGATATCCGACGGTAGTGTNNNNNAGCACCCCCAAACCAT	52360729	52360927	+	0	10
INF1_smMIP_DNAH1_14	3:52361793-52361944/18,22/+	0.887389	3	52361793	52361810	CTGGGGAGGGTATTACTT	1	52361923	52361944	GCCGGACTCCCAGAGAGTGGAT	1	52361811	52361922	AGGCACCCCATCCTTTGGCACACCCAGTCCCACCTGGGCCCCACTAGAGGAGCTGCTTCTTCCCAATGTTGGCCTGCTTTCTTCCAGGTATTTGACAATGAGGACTTTGACT	GCCGGACTCCCAGAGAGTGGATCTTCAGCTTCCCGATATCCGACGGTAGTGTNNNNNCTGGGGAGGGTATTACTT	52361876	52362050	+	0	1
INF1_smMIP_DNAH1_15	3:52361880-52362031/16,24/+	0.902708	3	52361880	52361895	TGGCCTGCTTTCTTCC	5	52362008	52362031	CACTGATGACTTCCTGGGGCATGG	1	52361896	52362007	AGGTATTTGACAATGAGGACTTTGACTGCCGGACTCCCAGAGAGTGGATCAACATGGGCTTGGAGCCAGGGTCTCTGGACAGGAAACCTGTCCCGGGAAAAGCCCTCTTGCC	CACTGATGACTTCCTGGGGCATGGCTTCAGCTTCCCGATATCCGACGGTAGTGTNNNNNTGGCCTGCTTTCTTCC	52361876	52362050	+	0	1
INF1_smMIP_DNAH1_16	3:52361944-52362095/17,23/-	0.870877	3	52362079	52362095	GGAGTCTGTGACAGGGC	1	52361944	52361966	CCCTGGCTCCAAGCCCATGTTGA	1	52361967	52362078	TGCTACTGGAATGAGATAGTGTCCCCACTCCAGAGTGGCCTTGCTCACCATGCCCCAGGAAGTCATCAGTGGGCAAGAGGGCTTTTCCCGGGACAGGTTTCCTGTCCAGAGA	CCCTGGCTCCAAGCCCATGTTGACTTCAGCTTCCCGATATCCGACGGTAGTGTNNNNNGGAGTCTGTGACAGGGC	52361876	52362050	-	0	1
INF1_smMIP_DNAH1_17	3:52365109-52365260/18,22/-	0.78521	3	52365243	52365260	TCTGTCTTGTGTACCAGG	1	52365109	52365130	CCGCCATGGGGGCAGGAAGGGG	1	52365131	52365242	TATAGCTTCTTCTCCTCGTCGTAGTCCAGGACGCCGACCTCGCACCATTTGTACTTCAGCTTCTGACTCTTGGGGTCCTCTGAAACAGGAGGAGAAACTCCACCAGTGCCCC	CCGCCATGGGGGCAGGAAGGGGCTTCAGCTTCCCGATATCCGACGGTAGTGTNNNNNTCTGTCTTGTGTACCAGG	52365142	52365345	-	0	1
INF1_smMIP_DNAH1_18	3:52365215-52365366/17,23/-	0.875624	3	52365350	52365366	CAAGCTGGGGTTCTGCC	1	52365215	52365237	CTTCTTCTCCTCGTCGTAGTCCA	1	52365238	52365349	TGGGGCAGCGGCAGGACCTCATACCTTCAGTGGTGACCCCTGCATTCAGGATGGGCCTCCCCATCTCATCTCGCACCAGGCCTTTCTCGTCTGTCTTGTGTACCAGGTATAG	CTTCTTCTCCTCGTCGTAGTCCACTTCAGCTTCCCGATATCCGACGGTAGTGTNNNNNCAAGCTGGGGTTCTGCC	52365142	52365345	-	0	1
INF1_smMIP_DNAH1_18b	3:52365215-52365366/17,23/-	0.875624	3	52365350	52365366	CAAGCTGGGGTTCTGCC	1	52365215	52365237	CTTCTTCTCCTCGTTGTAGTCCA	1	52365238	52365349	TGGGGCAGCGGCAGGACCTCATACCTTCAGTGGTGACCCCTGCATTCAGGATGGGCCTCCCCATCTCATCTCGCACCAGGCCTTTCTCGTCTGTCTTGTGTACCAGGTATAG	CTTCTTCTCCTCGTTGTAGTCCACTTCAGCTTCCCGATATCCGACGGTAGTGTNNNNNCAAGCTGGGGTTCTGCC	52365142	52365345	-	0	1
INF1_smMIP_DNAH1_19	3:52365270-52365421/16,24/-	0.747137	3	52365406	52365421	CCTGATCTGGCAGTGC	3	52365270	52365293	CTCCCCATCTCATCTCGCACCAGG	1	52365294	52365405	CCTGGGCGGAGTTGGCCTCAGTCACAGGCCGGCCAGGCCCAAGCTGGGGTTCTGCCTGGGGCAGCGGCAGGACCTCATACCTTCAGTGGTGACCCCTGCATTCAGGATGGGC	CTCCCCATCTCATCTCGCACCAGGCTTCAGCTTCCCGATATCCGACGGTAGTGTNNNNNCCTGATCTGGCAGTGC	52365142	52365345	-	0	1
INF1_smMIP_DNAH1_20	3:52366014-52366165/22,18/-	0.757619	3	52366144	52366165	TGGCCTTCCTGGGGGCCGGGTG	1	52366014	52366031	CCTGTTGCATCTGTGAAA	1	52366032	52366143	AGAGGGAGAAGGGGACACACAATCAGGCTTTCTGGGCTGAAACACTAGGTTCCGGCCGGCTGTGCCGTGGATGCCCAGTGGCCCTGAACAAATTGTTTCCCTCTTCTGACCC	CCTGTTGCATCTGTGAAACTTCAGCTTCCCGATATCCGACGGTAGTGTNNNNNTGGCCTTCCTGGGGGCCGGGTG	52366136	52366430	-	0	20
INF1_smMIP_DNAH1_21	3:52366126-52366277/18,22/+	0.847353	3	52366126	52366143	GTGTCCCCTTCTCCCTCT	7	52366256	52366277	GCCAACGCCCTGCGCAAGAACA	1	52366144	52366255	CACCCGGCCCCCAGGAAGGCCACCCCTTCAGGTCTGTCAGTACTGGGTGCCACGGATCCAGCTTCTCTTCTGCGCTGAGGACCCTTGCATGTTCGCACAACGTGTGGTCCAG	GCCAACGCCCTGCGCAAGAACACTTCAGCTTCCCGATATCCGACGGTAGTGTNNNNNGTGTCCCCTTCTCCCTCT	52366136	52366430	+	0	1
INF1_smMIP_DNAH1_22	3:52366201-52366352/16,24/+	0.902631	3	52366201	52366216	CCAGCTTCTCTTCTGC	13	52366329	52366352	GCCAGCATGTCATCAGTGAACAGA	1	52366217	52366328	GCTGAGGACCCTTGCATGTTCGCACAACGTGTGGTCCAGGCCAACGCCCTGCGCAAGAACACGGAAGCACTGCTGCTCTACAACTTGTATGTGGACTGCATGCCCTCTGACG	GCCAGCATGTCATCAGTGAACAGACTTCAGCTTCCCGATATCCGACGGTAGTGTNNNNNCCAGCTTCTCTTCTGC	52366136	52366430	+	0	1
INF1_smMIP_DNAH1_23	3:52366260-52366411/17,23/-	0.822117	3	52366395	52366411	CGAGGGGCCTTTGCGCA	1	52366260	52366282	TTCCGTGTTCTTGCGCAGGGCGT	1	52366283	52366394	TCCGAGGCGTGCTCAGGGCCCACTGCTTGATCTTGCTCAGGCTCTGTTCACTGATGACATGCTGGCCGTCAGAGGGCATGCAGTCCACATACAAGTTGTAGAGCAGCAGTGC	TTCCGTGTTCTTGCGCAGGGCGTCTTCAGCTTCCCGATATCCGACGGTAGTGTNNNNNCGAGGGGCCTTTGCGCA	52366136	52366430	-	0	20
INF1_smMIP_DNAH1_24	3:52366341-52366492/17,23/-	0.837714	3	52366476	52366492	CCTGGAGTAGCACCAAC	1	52366341	52366363	CTTGCTCAGGCTCTGTTCACTGA	1	52366364	52366475	TTCCTATGGGAAGGTTCCCTGAAGAAGGTGATGCCCAGAATAGGGAAGGCCGAGCGGGGACTCACGAGGGGCCTTTGCGCATCCGAGGCGTGCTCAGGGCCCACTGCTTGAT	CTTGCTCAGGCTCTGTTCACTGACTTCAGCTTCCCGATATCCGACGGTAGTGTNNNNNCCTGGAGTAGCACCAAC	52366136	52366430	-	0	1
INF1_smMIP_DNAH1_25	3:52378447-52378598/18,22/-	0.872032	3	52378581	52378598	GAAGAGACAACGTGGTCA	1	52378447	52378468	CCACACCCTGTGAACCCCAGCC	1	52378469	52378580	AAGTTGATCTTGTTCATGCTGCGCTCATAGTCCAGGCTCACTTCTCTGGCAAGACTGCTGAGGTGCTCTAGAACCCTGCCCATAGAGATGGGAGATGGGGGAATCAGGGGCT	CCACACCCTGTGAACCCCAGCCCTTCAGCTTCCCGATATCCGACGGTAGTGTNNNNNGAAGAGACAACGTGGTCA	52378484	52378683	-	0	5
INF1_smMIP_DNAH1_26b	3:52378550-52378701/17,23/-	0.805044	3	52378685	52378701	GATGGCCATGGAGCCCA	3	52378550	52378572	CTCGTTCATGCTGCGCTCATAGT	1	52378573	52378684	TCTTGGTCCAGTGACCCTCACCTCGCTCAGGCACCTGCTCCTCCTCCTTCTTGGGGAGGGTGACGTAGGAGAAGGTCTCGGGCTTGGAAGAGACAACGTGGTCAAAGTTGAT	CTCGTTCATGCTGCGCTCATAGTCTTCAGCTTCCCGATATCCGACGGTAGTGTNNNNNGATGGCCATGGAGCCCA	52378484	52378683	-	0	1
INF1_smMIP_DNAH1_26	3:52378550-52378701/17,23/-	0.805044	3	52378685	52378701	GATGGCCATGGAGCCCA	3	52378550	52378572	CTTGTTCATGCTGCGCTCATAGT	1	52378573	52378684	TCTTGGTCCAGTGACCCTCACCTCGCTCAGGCACCTGCTCCTCCTCCTTCTTGGGGAGGGTGACGTAGGAGAAGGTCTCGGGCTTGGAAGAGACAACGTGGTCAAAGTTGAT	CTTGTTCATGCTGCGCTCATAGTCTTCAGCTTCCCGATATCCGACGGTAGTGTNNNNNGATGGCCATGGAGCCCA	52378484	52378683	-	0	1
INF1_smMIP_DNAH1_27	3:52378578-52378729/21,19/+	0.753128	3	52378578	52378598	CTTTGACCACGTTGTCTCTTC	1	52378711	52378729	AGAGCCCCCTCCCACCTTC	1	52378599	52378710	CAAGCCCGAGACCTTCTCCTACGTCACCCTCCCCAAGAAGGAGGAGGAGCAGGTGCCTGAGCGAGGTGAGGGTCACTGGACCAAGATGGGCTCCATGGCCATCCACCTGGCC	AGAGCCCCCTCCCACCTTCCTTCAGCTTCCCGATATCCGACGGTAGTGTNNNNNCTTTGACCACGTTGTCTCTTC	52378484	52378683	+	0	1
INF1_smMIP_DNAH1_28	3:52379440-52379591/17,23/-	0.852718	3	52379575	52379591	CCTCTGGCCGTGTGAGC	1	52379440	52379462	CCAGGGGACAGGACAGATCCACA	1	52379463	52379574	AGGGACACGAAAGTGAAGTCCTCCTTCTGCTCCCAGAAGTGGTACTTGGGGACACTCACCAGCCCTGCAGGGATAGGGGCCAAGGGCCAGTATCAGACCCTGCCTGGCCAAA	CCAGGGGACAGGACAGATCCACACTTCAGCTTCCCGATATCCGACGGTAGTGTNNNNNCCTCTGGCCGTGTGAGC	52379489	52379742	-	0	1
INF1_smMIP_DNAH1_29	3:52379504-52379655/17,23/-	0.78461	3	52379639	52379655	TGGAACAGGGACATGGC	1	52379504	52379526	GGGACACTCACCAGCCCTGCAGG	1	52379527	52379638	GGTCACCTTGTTGCACTCGGCCCTCACCTTGCTGAGGGCCGTGATGACCTCTGGCCGTGTGAGCAGGGACACGAAAGTGAAGTCCTCCTTCTGCTCCCAGAAGTGGTACTTG	GGGACACTCACCAGCCCTGCAGGCTTCAGCTTCCCGATATCCGACGGTAGTGTNNNNNTGGAACAGGGACATGGC	52379489	52379742	-	0	1
INF1_smMIP_DNAH1_30	3:52379595-52379746/16,24/-	0.868915	3	52379731	52379746	CCTGTGCCCTTGATGC	2	52379595	52379618	CCCTCACCTTGCTGAGGGCCGTGA	1	52379619	52379730	CCACAAACCTGGGAGAAGGTCTGTGACTGGATCTGCTCAAATTCCTCCAGGTGGCTGTACTTGGAGAGGCTCGAGTGGAACAGGGACATGGCGGTCACCTTGTTGCACTCGG	CCCTCACCTTGCTGAGGGCCGTGACTTCAGCTTCCCGATATCCGACGGTAGTGTNNNNNCCTGTGCCCTTGATGC	52379489	52379742	-	0	1
INF1_smMIP_DNAH1_31	3:52379665-52379816/18,22/-	0.83882	3	52379799	52379816	CTGACCCTGGCCTTCCGC	1	52379665	52379686	CTCCAGGTGGCTGTACTTGGAG	1	52379687	52379798	TGCAGCCCCGACCTGTGCCTGCCAGTTCCAAGGGTCTGCCCTGCGTTTGCCCCCTGTGCCCTTGATGCCCACAAACCTGGGAGAAGGTCTGTGACTGGATCTGCTCAAATTC	CTCCAGGTGGCTGTACTTGGAGCTTCAGCTTCCCGATATCCGACGGTAGTGTNNNNNCTGACCCTGGCCTTCCGC	52379489	52379742	-	0	1
INF1_smMIP_DNAH1_32	3:52380427-52380578/20,20/-	0.867252	3	52380559	52380578	GGTTGTACCAGCCCTTGCTC	1	52380427	52380446	CCCACGACCTATAGCTGCAC	1	52380447	52380558	ATGTCGCGCAGGCTGCTGCGCATGGCCACCTTTAGCGAGCTGATCCAGCTGTCCTTGAGGAACATCTGCACCTAGAGTGGCCACAGGCATCATCATATGGCCACCCTGGGGA	CCCACGACCTATAGCTGCACCTTCAGCTTCCCGATATCCGACGGTAGTGTNNNNNGGTTGTACCAGCCCTTGCTC	52380466	52380806	-	0	1
INF1_smMIP_DNAH1_33	3:52380524-52380675/16,24/+	0.849883	3	52380524	52380539	CTAAAGGTGGCCATGC	4	52380652	52380675	GCAGGACACACTGCGCTTCCTGGT	1	52380540	52380651	GCAGCAGCCTGCGCGACATGAGCAAGGGCTGGTACAACCTCTACGAGACCAACTGGGAGGTGTACCTCATGTCCAAGCTGCGCAAGCTGATGGAGCTGGTGAAGTACATGCT	GCAGGACACACTGCGCTTCCTGGTCTTCAGCTTCCCGATATCCGACGGTAGTGTNNNNNCTAAAGGTGGCCATGC	52380466	52380806	+	0	1
INF1_smMIP_DNAH1_34	3:52380594-52380745/16,24/-	0.872347	3	52380730	52380745	ATCGGTGCAGTTGAGC	1	52380594	52380617	GCTTGGACATGAGGTACACCTCCC	1	52380618	52380729	ACGCTGCAACAGGTGTCGCTGATGAACTGTGAGAAGCTGGCAAGTGAGTCCTGCACCAGGAAGCGCAGTGTGTCCTGCAGCATGTACTTCACCAGCTCCATCAGCTTGCGCA	GCTTGGACATGAGGTACACCTCCCCTTCAGCTTCCCGATATCCGACGGTAGTGTNNNNNATCGGTGCAGTTGAGC	52380466	52380806	-	0	1
INF1_smMIP_DNAH1_35	3:52380689-52380840/16,24/-	0.813769	3	52380825	52380840	GCAGGTGACACATCAC	3	52380689	52380712	GCTGATGAACTGTGAGAAGCTGGC	1	52380713	52380824	CTGGTGTCAACAGGTGCCTCCGCCCCGCCGGGCCCCACCTGTAGGGGCTGTTAATTAAGTCGTCACCCCAGACCATGTCATCGGTGCAGTTGAGCACGCTGCAACAGGTGTC	GCTGATGAACTGTGAGAAGCTGGCCTTCAGCTTCCCGATATCCGACGGTAGTGTNNNNNGCAGGTGACACATCAC	52380466	52380806	-	0	20
INF1_smMIP_DNAH1_36	3:52381789-52381940/16,24/-	0.831918	3	52381925	52381940	GGTTCAGCAGAGATGC	3	52381789	52381812	GCAGAGGCCTAGGAGGCCTGTGTG	1	52381813	52381924	CTCAAACTGCTCCAGTGGGGTGCTATAGTGCACCCCAGAGCTGTCCAGCACCAGGTCCATGATGAACAGGGGATTCTTCCGGGGCCTGCAGGCAATGGCGAGCTGACTGTGG	GCAGAGGCCTAGGAGGCCTGTGTGCTTCAGCTTCCCGATATCCGACGGTAGTGTNNNNNGGTTCAGCAGAGATGC	52381818	52382010	-	0	1
INF1_smMIP_DNAH1_37	3:52381896-52382047/16,24/+	0.72293	3	52381896	52381911	ACTATAGCACCCCACT	3	52382024	52382047	CTGCTGCCCTGGCTGCTGATGGCT	1	52381912	52382023	GGAGCAGTTTGAGGCATCTCTGCTGAACCTCTTCGACAAGGGCATCCTGGCCACCCATGCCGTGCCCCAGCTGGAGAAGGTACGTGCTGCAGCCTGAGCAGGCCCCAGGCAC	CTGCTGCCCTGGCTGCTGATGGCTCTTCAGCTTCCCGATATCCGACGGTAGTGTNNNNNACTATAGCACCCCACT	52381818	52382010	+	0	10
INF1_smMIP_DNAH1_38	3:52382830-52382981/16,24/-	0.715393	3	52382966	52382981	CTCTTCCACCAGTGGC	4	52382830	52382853	AATGAGCAGAGGGGAGATGGGGAG	1	52382854	52382965	TCATGAAGGCCCACGGACTCCAGCAGGGGGTCACCGCTGATGAAGATGTCCTCCATCACCAGCTGCAGAGGGAAGGCATGTGGCAGGGCAGACCTGGATGAGCCAGGGGGTG	AATGAGCAGAGGGGAGATGGGGAGCTTCAGCTTCCCGATATCCGACGGTAGTGTNNNNNCTCTTCCACCAGTGGC	52382882	52383456	-	0	10
INF1_smMIP_DNAH1_39	3:52382895-52383046/18,22/-	0.846516	3	52383029	52383046	TCCTTGGCGTAGGCCTGC	1	52382895	52382916	CCTCCATCACCAGCTGCAGAGG	1	52382917	52383028	AGTGGGATCATGGCCTTGGACACGGCACTGGCAATGGTGGCCCGTAGCTCTTCCACCAGTGGCTCATGAAGGCCCACGGACTCCAGCAGGGGGTCACCGCTGATGAAGATGT	CCTCCATCACCAGCTGCAGAGGCTTCAGCTTCCCGATATCCGACGGTAGTGTNNNNNTCCTTGGCGTAGGCCTGC	52382882	52383456	-	0	1
INF1_smMIP_DNAH1_40	3:52383004-52383155/22,18/-	0.875776	3	52383134	52383155	GGATACACATGCACAAACACAC	1	52383004	52383021	TCATGGCCTTGGACACGG	1	52383022	52383133	AGACACCCTCCGACGTGCATGGGCACACGTACGCACTTGAGAAAGGAGGCAATGTCATTGTTGTTCAGCTCCAGGTACTTTCGGTACTCCTTGGCGTAGGCCTGCAGTGGGA	TCATGGCCTTGGACACGGCTTCAGCTTCCCGATATCCGACGGTAGTGTNNNNNGGATACACATGCACAAACACAC	52382882	52383456	-	0	10
INF1_smMIP_DNAH1_41	3:52383018-52383169/21,19/+	0.863992	3	52383018	52383038	ATGATCCCACTGCAGGCCTAC	1	52383151	52383169	TATCCCCTGCCCACCCTGC	1	52383039	52383150	GCCAAGGAGTACCGAAAGTACCTGGAGCTGAACAACAATGACATTGCCTCCTTTCTCAAGTGCGTACGTGTGCCCATGCACGTCGGAGGGTGTCTGTGTGTTTGTGCATGTG	TATCCCCTGCCCACCCTGCCTTCAGCTTCCCGATATCCGACGGTAGTGTNNNNNATGATCCCACTGCAGGCCTAC	52382882	52383456	+	0	20
INF1_smMIP_DNAH1_42	3:52383126-52383277/16,24/+	0.850628	3	52383126	52383141	GGGTGTCTGTGTGTTT	17	52383254	52383277	GTAGTGCTCACCCACCTGCGGGAG	1	52383142	52383253	GTGCATGTGTATCCCCTGCCCACCCTGCTCACCATCCTCTGCCCCCTCCCGTGTGCTTGCTGTCCTCAGAACCTACCAGACGCAGGGCCTGTTGGCCCAGGAGGTGCGGGAG	GTAGTGCTCACCCACCTGCGGGAGCTTCAGCTTCCCGATATCCGACGGTAGTGTNNNNNGGGTGTCTGTGTGTTT	52382882	52383456	+	0	10
INF1_smMIP_DNAH1_43	3:52383231-52383382/20,20/+	0.881679	3	52383231	52383250	TGTTGGCCCAGGAGGTGCGG	1	52383363	52383382	CCAAGAAACGCAAGGCCCTG	1	52383251	52383362	GAGGTAGTGCTCACCCACCTGCGGGAGAAGGAGATCCTGGACAGCTCGCTGCCCAGCAGCATCATCATTGGGCCTTTCTACATCAACACCGACAATGTCAAGCAGAGCCTGT	CCAAGAAACGCAAGGCCCTGCTTCAGCTTCCCGATATCCGACGGTAGTGTNNNNNTGTTGGCCCAGGAGGTGCGG	52382882	52383456	+	0	1
INF1_smMIP_DNAH1_44	3:52383344-52383495/16,24/+	0.839901	3	52383344	52383359	AATGTCAAGCAGAGCC	18	52383472	52383495	CAGCACACACCACAGCAGCACACA	1	52383360	52383471	TGTCCAAGAAACGCAAGGCCCTGGCCACTTCCGTGCTGGACATCCTTGCCAAGAACCTGCATAAGGAGGTGGATAGCGTAAGTGCCCACCTGCCCCGCCTCAGTGACCACAG	CAGCACACACCACAGCAGCACACACTTCAGCTTCCCGATATCCGACGGTAGTGTNNNNNAATGTCAAGCAGAGCC	52382882	52383456	+	0	1
INF1_smMIP_DNAH1_45	3:52383393-52383544/16,24/-	0.849429	3	52383529	52383544	ACACCCCAGACCCTGC	2	52383393	52383416	GGTTCTTGGCAAGGATGTCCAGCA	1	52383417	52383528	TTGGGGACATCTTGCCATGTATGTGAGGGTCCGTGTGTGCTGCTGTGGTGTGTGCTGCTGTGGTCACTGAGGCGGGGCAGGTGGGCACTTACGCTATCCACCTCCTTATGCA	GGTTCTTGGCAAGGATGTCCAGCACTTCAGCTTCCCGATATCCGACGGTAGTGTNNNNNACACCCCAGACCCTGC	52382882	52383456	-	0	1
INF1_smMIP_DNAH1_46	3:52383945-52384096/19,21/+	0.928479	3	52383945	52383963	AGGTGAGGGAAGGCAAGGG	2	52384076	52384096	GCTGCGAGAGTGGATGAAGGG	1	52383964	52384075	AGCAGCATGCTGCCCTCCCCAGCGCCTCCTCCCACTGCCAGATCTGCGAGGAGTTCCGCAGCATCAGCCGCAAGATCTATGAGAAGCCCAACAGCATTGAGGAGCTGGCTGA	GCTGCGAGAGTGGATGAAGGGCTTCAGCTTCCCGATATCCGACGGTAGTGTNNNNNAGGTGAGGGAAGGCAAGGG	52383983	52384144	+	0	1
INF1_smMIP_DNAH1_47	3:52383995-52384146/18,22/-	0.742366	3	52384129	52384146	AGTGCCCGTGTGCCTGCC	1	52383995	52384016	CTCCTCGCAGATCTGGCAGTGG	1	52384017	52384128	TCACCTCCAGGCCCACCAGCCTCTCCGGGATGCCCTTCATCCACTCTCGCAGCTCAGCCAGCTCCTCAATGCTGTTGGGCTTCTCATAGATCTTGCGGCTGATGCTGCGGAA	CTCCTCGCAGATCTGGCAGTGGCTTCAGCTTCCCGATATCCGACGGTAGTGTNNNNNAGTGCCCGTGTGCCTGCC	52383983	52384144	-	0	1
INF1_smMIP_DNAH1_48	3:52384105-52384256/17,23/-	0.740349	3	52384240	52384256	TCTGTCCTCTGTCCAAC	1	52384105	52384127	CACCTCCAGGCCCACCAGCCTCT	1	52384128	52384239	TACCTTACCCTCAGCCTCCTGAGTCCGACCTCCCAGCCCCTGCCTGCCCCAGCCCTCGGACTCTTAACACCAGCCCTGTGCCTCCCTGGCCCCAGTGCCCGTGTGCCTGCCT	CACCTCCAGGCCCACCAGCCTCTCTTCAGCTTCCCGATATCCGACGGTAGTGTNNNNNTCTGTCCTCTGTCCAAC	52383983	52384144	-	0	20
INF1_smMIP_DNAH1_49	3:52384481-52384632/18,22/-	0.904759	3	52384615	52384632	GGCATGGGGGCCAAGCTC	2	52384481	52384502	AGAACTTCACGTGTGCCAGGGA	1	52384503	52384614	CCACTCACTTGTCATTGAAGTCATCTGAGCTGAGGTTGTAGAGGAATTCATCCATGACCTGGTAGTCATCCATGACCTTCACAATCCGCTCCTGCACAGACAGGTGGTAATG	AGAACTTCACGTGTGCCAGGGACTTCAGCTTCCCGATATCCGACGGTAGTGTNNNNNGGCATGGGGGCCAAGCTC	52384502	52384626	-	0	1
INF1_smMIP_DNAH1_50	3:52384510-52384661/17,23/+	0.917756	3	52384510	52384526	ACCTGTCTGTGCAGGAG	1	52384639	52384661	GGGGTGGAGCATGAGGGGAGCTG	1	52384527	52384638	CGGATTGTGAAGGTCATGGATGACTACCAGGTCATGGATGAATTCCTCTACAACCTCAGCTCAGATGACTTCAATGACAAGTGAGTGGGAGCTTGGCCCCCATGCCAGGTGC	GGGGTGGAGCATGAGGGGAGCTGCTTCAGCTTCCCGATATCCGACGGTAGTGTNNNNNACCTGTCTGTGCAGGAG	52384502	52384626	+	0	20
INF1_smMIP_DNAH1_51	3:52385878-52386029/16,24/-	0.860653	3	52386014	52386029	CACCAGCTCTATCTGC	2	52385878	52385901	CCCACCAGGCACCCAGGCAGCCAG	1	52385902	52386013	CCAAGGATCTTAGAAGGCCAGTTGCTGGCAATCCATCTGGCCGGGATGGGGGTGGGGATTGGGAGAAATATCGCGGCTGAAGTGGTGGAGTGGCAAGACCAGGCAGGGGCAT	CCCACCAGGCACCCAGGCAGCCAGCTTCAGCTTCCCGATATCCGACGGTAGTGTNNNNNCACCAGCTCTATCTGC	52385956	52386139	-	0	1
INF1_smMIP_DNAH1_52	3:52385971-52386122/21,19/+	0.929013	3	52385971	52385991	CGGCCAGATGGATTGCCAGCA	1	52386104	52386122	GCTGGAAGGGCTGCAGGTG	1	52385992	52386103	ACTGGCCTTCTAAGATCCTTGGGCAGATAGAGCTGGTGCAGCAGCAGCATGTGGAGGATGAGGAGAAGTTCCGCAAAATCCAGATCATGGATCAGAACAACTTCCAAGAGAA	GCTGGAAGGGCTGCAGGTGCTTCAGCTTCCCGATATCCGACGGTAGTGTNNNNNCGGCCAGATGGATTGCCAGCA	52385956	52386139	+	0	1
INF1_smMIP_DNAH1_53	3:52386007-52386158/21,19/+	0.909525	3	52386007	52386027	TCCTTGGGCAGATAGAGCTGG	1	52386140	52386158	TGGTGCTGGACACAGCCCC	1	52386028	52386139	TGCAGCAGCAGCATGTGGAGGATGAGGAGAAGTTCCGCAAAATCCAGATCATGGATCAGAACAACTTCCAAGAGAAGCTGGAAGGGCTGCAGGTGGGGCACAGCTGCAGGCT	TGGTGCTGGACACAGCCCCCTTCAGCTTCCCGATATCCGACGGTAGTGTNNNNNTCCTTGGGCAGATAGAGCTGG	52385956	52386139	+	0	10
INF1_smMIP_DNAH1_54	3:52386516-52386667/17,23/-	0.924766	3	52386651	52386667	GCTGGCAGTCCTTCAGC	3	52386516	52386538	CCCCTGCAGCCCCACTTGTGTCC	1	52386539	52386650	TGCTTCTTGACACGCCGCACCTCGTTGGCGATCTCGTGTGCACGTGAAATCTCCACATGGATGGAGAAGCCAGCTACTACCAGCTGCAGGCCAAGGAGCAATGGGTCAGATG	CCCCTGCAGCCCCACTTGTGTCCCTTCAGCTTCCCGATATCCGACGGTAGTGTNNNNNGCTGGCAGTCCTTCAGC	52386546	52386743	-	0	1
INF1_smMIP_DNAH1_55	3:52386572-52386723/17,23/-	0.869464	3	52386707	52386723	ATTGGTGATGGGCAAGC	1	52386572	52386594	ATGGATGGAGAAGCCAGCTACTA	1	52386595	52386706	TGAAGATGCGCTCGCGGTTGTTGTAGAGCATGGCCAGCTGCTGGCAGTCCTTCAGCTGCTTCTTGACACGCCGCACCTCGTTGGCGATCTCGTGTGCACGTGAAATCTCCAC	ATGGATGGAGAAGCCAGCTACTACTTCAGCTTCCCGATATCCGACGGTAGTGTNNNNNATTGGTGATGGGCAAGC	52386546	52386743	-	0	10
INF1_smMIP_DNAH1_56	3:52386673-52386824/16,24/-	0.676474	3	52386809	52386824	TGCCCCCAAATGCCAG	3	52386673	52386696	CTCGCGGTTGTTGTAGAGCATGGC	1	52386697	52386808	AGCCCTGCCTCCTGGCAGCTGCATCTACATGAGCTGCTTCCTCAAGCCTGGGGGCATGGGGGCAGGGTGCCTGCAGGAGGCCTACATTGGTGATGGGCAAGCTGAAGATGCG	CTCGCGGTTGTTGTAGAGCATGGCCTTCAGCTTCCCGATATCCGACGGTAGTGTNNNNNTGCCCCCAAATGCCAG	52386546	52386743	-	0	1
INF1_smMIP_DNAH1_57	3:52386991-52387142/16,24/-	0.805898	3	52387127	52387142	CACCATCCTGGAGAGC	4	52386991	52387014	GGCTGATGTCCCTGACCGTGCCCC	1	52387015	52387126	TTGTCATACTGCAGGGACAGGAGGGCAGGGCTGGGGCTGTCTTGGGACACTTCCCAGTCTCTCTCCATGTTGCCCCTTCTTGGGCCAGGTCCTCTCCCTCTCCCTTGCTCCT	GGCTGATGTCCCTGACCGTGCCCCCTTCAGCTTCCCGATATCCGACGGTAGTGTNNNNNCACCATCCTGGAGAGC	52387097	52387669	-	0	1
INF1_smMIP_DNAH1_58	3:52387111-52387262/16,24/+	0.838301	3	52387111	52387126	CCCTGCAGTATGACAA	2	52387239	52387262	GCTGAGCAGCTGGAGAAGAACGTG	1	52387127	52387238	GCTCTCCAGGATGGTGAAGGAGTTCCAACCCTACCTGGACCTTTGGACCACAGCGTCTGACTGGCTGCGCTGGTCGGAGAGCTGGATGAATGACCCCCTCTCTGCCATCGAT	GCTGAGCAGCTGGAGAAGAACGTGCTTCAGCTTCCCGATATCCGACGGTAGTGTNNNNNCCCTGCAGTATGACAA	52387097	52387669	+	0	1
INF1_smMIP_DNAH1_59	3:52387215-52387366/20,20/+	0.901941	3	52387215	52387234	AATGACCCCCTCTCTGCCAT	1	52387347	52387366	TCCCTGCCTCTGCCGCCTGC	1	52387235	52387346	CGATGCTGAGCAGCTGGAGAAGAACGTGGTTGAAGCCTTCAAGACCATGCACAAGTGCGTGAAGCAGTTTAAGGACATGCCAGGTAGGGAGCCAAGCCGGCCAATCCCCTCC	TCCCTGCCTCTGCCGCCTGCCTTCAGCTTCCCGATATCCGACGGTAGTGTNNNNNAATGACCCCCTCTCTGCCAT	52387097	52387669	+	0	1
INF1_smMIP_DNAH1_60	3:52387229-52387380/21,19/-	0.801981	3	52387360	52387380	GAAACGCATGAGAGGCAGGCG	1	52387229	52387247	CTGCTCAGCATCGATGGCA	1	52387248	52387359	GCAGAGGCAGGGAGGAGGGGATTGGCCGGCTTGGCTCCCTACCTGGCATGTCCTTAAACTGCTTCACGCACTTGTGCATGGTCTTGAAGGCTTCAACCACGTTCTTCTCCAG	CTGCTCAGCATCGATGGCACTTCAGCTTCCCGATATCCGACGGTAGTGTNNNNNGAAACGCATGAGAGGCAGGCG	52387097	52387669	-	0	1
INF1_smMIP_DNAH1_61	3:52387336-52387487/16,24/-	0.761975	3	52387472	52387487	CATGCCAGGGTTGCGC	1	52387336	52387359	GCAGAGGCAGGGAGGAGGGGATTG	1	52387360	52387471	AGCCCCTGGATCAGTGGGATGTATGGTTTGAACTCCTCGATGCGGGCCCGGATGTCCAAGGCCACTTCCTGGCAGGCTGCCGGGTAAGACAGAAACGCATGAGAGGCAGGCG	GCAGAGGCAGGGAGGAGGGGATTGCTTCAGCTTCCCGATATCCGACGGTAGTGTNNNNNCATGCCAGGGTTGCGC	52387097	52387669	-	0	1
INF1_smMIP_DNAH1_62	3:52387401-52387552/16,24/+	0.802952	3	52387401	52387416	CAGGAAGTGGCCTTGG	10	52387529	52387552	CAATGTCAGGCCCAAGGCCAACCT	1	52387417	52387528	ACATCCGGGCCCGCATCGAGGAGTTCAAACCATACATCCCACTGATCCAGGGGCTGCGCAACCCTGGCATGCGGATCCGGCACTGGGAGACACTGTCCAACCAGATCAACAT	CAATGTCAGGCCCAAGGCCAACCTCTTCAGCTTCCCGATATCCGACGGTAGTGTNNNNNCAGGAAGTGGCCTTGG	52387097	52387669	+	0	20
INF1_smMIP_DNAH1_63	3:52387485-52387636/17,23/+	0.884087	3	52387485	52387501	ATGCGGATCCGGCACTG	1	52387614	52387636	GCTGAGGTGGCTGGCAAGGAGTA	1	52387502	52387613	GGAGACACTGTCCAACCAGATCAACATCAATGTCAGGCCCAAGGCCAACCTGACCTTTGCTCGCTGCCTGGAGATGAACCTGCAGGACCATATCGAGAGCATCAGCAAGGTG	GCTGAGGTGGCTGGCAAGGAGTACTTCAGCTTCCCGATATCCGACGGTAGTGTNNNNNATGCGGATCCGGCACTG	52387097	52387669	+	0	1
INF1_smMIP_DNAH1_64	3:52387544-52387695/18,22/-	0.719253	3	52387678	52387695	CGGCAGGGCCTGGCTGGA	1	52387544	52387565	GCGAGCAAAGGTCAGGTTGGCC	1	52387566	52387677	GTGGCTGGGCCCGCTGGTGGCTACCCACCTGCTCGATGGCGTACTCCTTGCCAGCCACCTCAGCCACCTTGCTGATGCTCTCGATATGGTCCTGCAGGTTCATCTCCAGGCA	GCGAGCAAAGGTCAGGTTGGCCCTTCAGCTTCCCGATATCCGACGGTAGTGTNNNNNCGGCAGGGCCTGGCTGGA	52387097	52387669	-	0	1
INF1_smMIP_DNAH1_65	3:52388787-52388938/16,24/+	0.763838	3	52388787	52388802	TGGGCAGGGCTGGTCA	5	52388915	52388938	CAAGGCGACAGACACCTACATCCT	1	52388803	52388914	GACAGCATCAGGACCAGCCCCTCCCAGGACTCAGCCTGGCTTGTCCCCGACCCCAGGCACTGGACAAGATGGAGAAGGAGTGGTCGACCATCCTGTTCAATGTACTGCCCTA	CAAGGCGACAGACACCTACATCCTCTTCAGCTTCCCGATATCCGACGGTAGTGTNNNNNTGGGCAGGGCTGGTCA	52388837	52389091	+	0	1
INF1_smMIP_DNAH1_66	3:52388893-52389044/20,20/-	0.841289	3	52389025	52389044	GGAGTTGATGCGCTGCTCAA	1	52388893	52388912	GGGCAGTACATTGAACAGGA	1	52388913	52389024	AGGGCTTCTTGTAGGGTGAAAATGACATATTCTGGGTCATGACGATGTGGTCGTCCAGCAGCTGTGAGGCCTCGTCCGGGCTCTTCAGGATGTAGGTGTCTGTCGCCTTGTA	GGGCAGTACATTGAACAGGACTTCAGCTTCCCGATATCCGACGGTAGTGTNNNNNGGAGTTGATGCGCTGCTCAA	52388837	52389091	-	0	1
INF1_smMIP_DNAH1_67	3:52388974-52389125/18,22/+	0.784363	3	52388974	52388991	ACCACATCGTCATGACCC	1	52389104	52389125	TCCCCCACTTCAGAGAGCCCGA	1	52388992	52389103	AGAATATGTCATTTTCACCCTACAAGAAGCCCTTTGAGCAGCGCATCAACTCCTGGGAGAACAAACTGAAGCTGACCCAGGTCGGCCCTCCCCCCAGTCCTTCCCTCATCGC	TCCCCCACTTCAGAGAGCCCGACTTCAGCTTCCCGATATCCGACGGTAGTGTNNNNNACCACATCGTCATGACCC	52388837	52389091	+	0	20
INF1_smMIP_DNAH1_68	3:52390497-52390648/16,24/-	0.790037	3	52390633	52390648	GCCACTCCTCCAGAAC	3	52390497	52390520	CTGGACACCAAAGCCAGTGTCTAC	1	52390521	52390632	CTCCTGGGGAGGGGAGGGGCAGGGAGGGGTGTGATATGGACTGTCAGGGTCCAAGCTGGGGTTTGTCCCAATGACTGGGACATTTCACCCCACCAGCATGTTGGGCAGAGCA	CTGGACACCAAAGCCAGTGTCTACCTTCAGCTTCCCGATATCCGACGGTAGTGTNNNNNGCCACTCCTCCAGAAC	52390608	52390814	-	0	1
INF1_smMIP_DNAH1_69	3:52390593-52390744/20,20/-	0.724909	3	52390725	52390744	TGGTCTGGTAGCGCTTGCTC	1	52390593	52390612	AGGGAGGGGTGTGATATGGA	1	52390613	52390724	TCCACAGGCAGCTGCTGGTTGATGTCCTCAGAGCTAAAGATGGGCTCCAGGTAGAGCCAGGACCGCTGACAGTTCAGCCACTCCTCCAGAACCTCCTGGGGAGGGGAGGGGC	AGGGAGGGGTGTGATATGGACTTCAGCTTCCCGATATCCGACGGTAGTGTNNNNNTGGTCTGGTAGCGCTTGCTC	52390608	52390814	-	0	1
INF1_smMIP_DNAH1_70	3:52390660-52390811/17,23/-	0.879628	3	52390795	52390811	ACCCTCATTGAGCTTGC	1	52390660	52390682	GGCTCCAGGTAGAGCCAGGACCG	1	52390683	52390794	CTCCCGGTTCTCGTAGGCATTCTTCATGATCTTCTTCCAGATCCGCTCCATGGTCTGGTAGCGCTTGCTCTCCACAGGCAGCTGCTGGTTGATGTCCTCAGAGCTAAAGATG	GGCTCCAGGTAGAGCCAGGACCGCTTCAGCTTCCCGATATCCGACGGTAGTGTNNNNNACCCTCATTGAGCTTGC	52390608	52390814	-	0	1
INF1_smMIP_DNAH1_71	3:52390710-52390861/16,24/+	0.897139	3	52390710	52390725	GCAGCTGCCTGTGGAG	12	52390838	52390861	GCCCTGGTCACATTGCTGGTAGCC	1	52390726	52390837	AGCAAGCGCTACCAGACCATGGAGCGGATCTGGAAGAAGATCATGAAGAATGCCTACGAGAACCGGGAGGCAAGCTCAATGAGGGTGGGAGGGGCAGCTGGGATCCCCAAGG	GCCCTGGTCACATTGCTGGTAGCCCTTCAGCTTCCCGATATCCGACGGTAGTGTNNNNNGCAGCTGCCTGTGGAG	52390608	52390814	+	0	1
INF1_smMIP_DNAH1_72	3:52391565-52391716/16,24/-	0.871395	3	52391701	52391716	GCTGAGGCCCTTCTGC	5	52391565	52391588	GGTCCAGGTAGCAAGATAGGCTCA	1	52391589	52391700	ACCAGGTCCAGAATCTTGTTGCAGTCCCGCAGGCTGTCCAGCATTCTCAGGTCGGAACACACATTGATCACCTGCAGGGCCCGGGCCATGCACAGAAATGGGCAGTGAGCAT	GGTCCAGGTAGCAAGATAGGCTCACTTCAGCTTCCCGATATCCGACGGTAGTGTNNNNNGCTGAGGCCCTTCTGC	52391608	52391771	-	0	1
INF1_smMIP_DNAH1_73	3:52391664-52391815/17,23/-	0.609303	3	52391799	52391815	GCCCTGGACACCTCAGC	3	52391664	52391686	CTTGTTGCAGTCCCGCAGGCTGT	1	52391687	52391798	CTTGTGGGCAGACAGTGGCGGAGTGGGCATGGCCAGGTGGCGCCCACCTGGGGAAGGCGCTCCTCTTGGTCTCCAGATACTCGCTGAGGCCCTTCTGCACCAGGTCCAGAAT	CTTGTTGCAGTCCCGCAGGCTGTCTTCAGCTTCCCGATATCCGACGGTAGTGTNNNNNGCCCTGGACACCTCAGC	52391608	52391771	-	0	1
INF1_smMIP_DNAH1_74	3:52391818-52391969/16,24/+	0.756518	3	52391818	52391833	TGCTCAGGCTAGGGTG	13	52391946	52391969	AGATCTTGTCGCAGACAAAGGACC	1	52391834	52391945	CGGGGATGTCAGCAGGACTGGGGCAGCTGGGGCCCAGGGAGCCTGCACGACCCGCTTCCTCACCCCTGTTCCCCTGGCAGATTCTACTTCCTGTCAGATGATGAACTACTAG	AGATCTTGTCGCAGACAAAGGACCCTTCAGCTTCCCGATATCCGACGGTAGTGTNNNNNTGCTCAGGCTAGGGTG	52391892	52392039	+	0	1
INF1_smMIP_DNAH1_75	3:52391905-52392056/18,22/-	0.76844	3	52392039	52392056	ATGCTCCCAGCCCTGAGC	1	52391905	52391926	CAGGAAGTAGAATCTGCCAGGG	1	52391927	52392038	CCCGGGCCCAGCTGCCCACCCGAGCGATGTTCTCGAAGCACTTGCGCAGGTGTGGCTGCACGGCCGTGGGGTCCTTTGTCTGCGACAAGATCTCTAGTAGTTCATCATCTGA	CAGGAAGTAGAATCTGCCAGGGCTTCAGCTTCCCGATATCCGACGGTAGTGTNNNNNATGCTCCCAGCCCTGAGC	52391892	52392039	-	0	1
INF1_smMIP_DNAH1_76	3:52392016-52392167/17,23/+	0.905971	3	52392016	52392032	TCGGGTGGGCAGCTGGG	2	52392145	52392167	ACACACCTGGGGCCTGTGGGAGG	1	52392033	52392144	CCCGGGGCTCAGGGCTGGGAGCATGGGGCATCTTCCCAGGGAGAACGTCCCTCCCTTTGTGATGAGCCCTTTTAGCAGGAAATGTGGCAAATGACATTCCTGGTCTTTGGAG	ACACACCTGGGGCCTGTGGGAGGCTTCAGCTTCCCGATATCCGACGGTAGTGTNNNNNTCGGGTGGGCAGCTGGG	52391892	52392039	+	0	1
INF1_smMIP_DNAH1_77	3:52392503-52392654/16,24/+	0.814283	3	52392503	52392518	CTGGGGCTGTGGTGGC	20	52392631	52392654	GTACAGTTGTGCTTCTCCATCTAC	1	52392519	52392630	CAGGGCATCTGGGCACACCAGGGTGACCCCACTCCTGCTCCTCCACTGCTTGCAGCTGCTATTCCAGGAGGACCTGGAGATCACGCACATGTACTCAGCCGAGGGGGAGGAG	GTACAGTTGTGCTTCTCCATCTACCTTCAGCTTCCCGATATCCGACGGTAGTGTNNNNNCTGGGGCTGTGGTGGC	52392552	52392773	+	0	1
INF1_smMIP_DNAH1_78	3:52392564-52392715/18,22/-	0.814212	3	52392698	52392715	GCACACTGGCCTTCATGC	1	52392564	52392585	CTGGAATAGCAGCTGCAAGCAG	1	52392586	52392697	TGCGCTCCACCTCCCGCAGCCAGTCCTCCACGTTGCTGGAGGGGTAGATGGAGAAGCACAACTGTACCTCCTCCCCCTCGGCTGAGTACATGTGCGTGATCTCCAGGTCCTC	CTGGAATAGCAGCTGCAAGCAGCTTCAGCTTCCCGATATCCGACGGTAGTGTNNNNNGCACACTGGCCTTCATGC	52392552	52392773	-	0	10
INF1_smMIP_DNAH1_79	3:52392638-52392789/16,24/-	0.82952	3	52392774	52392789	AGGGGTGGAAGGCTGC	6	52392638	52392661	TGGAGGGGTAGATGGAGAAGCACA	1	52392662	52392773	ACGGGCTGCGGGCGGCTCACCGTGGGGTAGGCCCTGATGGCCTTCTCAATGATGTCGTGCACACTGGCCTTCATGCTGCGCTCCACCTCCCGCAGCCAGTCCTCCACGTTGC	TGGAGGGGTAGATGGAGAAGCACACTTCAGCTTCCCGATATCCGACGGTAGTGTNNNNNAGGGGTGGAAGGCTGC	52392552	52392773	-	0	1
INF1_smMIP_DNAH1_80	3:52393162-52393313/18,22/-	0.875157	3	52393296	52393313	CAGCGATGGTCACCTGGC	1	52393162	52393183	CTGTGCTCTGGCCTTTCAGACT	1	52393184	52393295	CAGGCCAGTTCAGAACCCACTGGGTCCTGGGCATCTGGGAAGACAGCATGGGCAGGCTGACCTGGACAGCCGCAGCCCCAATCCCATTCTTTCTTCTTCCTCTGAATGCTGT	CTGTGCTCTGGCCTTTCAGACTCTTCAGCTTCCCGATATCCGACGGTAGTGTNNNNNCAGCGATGGTCACCTGGC	52393240	52393422	-	0	1
INF1_smMIP_DNAH1_81	3:52393259-52393410/16,24/-	0.768598	3	52393395	52393410	ACTCCAACCTGCTGGC	5	52393259	52393282	AACCCACTGGGTCCTGGGCATCTG	1	52393283	52393394	AGAGCTGGGGGAACAGTTGGCTTCTGAGGTTGCCGGCCTCCAGAGCCTCTGCCACCTCCATGGTCCAGTAGGTCTGGCACCCAGCGATGGTCACCTGGCCAGGCCAGTTCAG	AACCCACTGGGTCCTGGGCATCTGCTTCAGCTTCCCGATATCCGACGGTAGTGTNNNNNACTCCAACCTGCTGGC	52393240	52393422	-	0	1
INF1_smMIP_DNAH1_82	3:52393364-52393515/18,22/+	0.754547	3	52393364	52393381	AACCTCAGAAGCCAACTG	2	52393494	52393515	GCCTGGAAGAGGCCTGGGGTTG	1	52393382	52393493	TTCCCCCAGCTCTGCCAGCAGGTTGGAGTCAAGAGGACCCCTGTCTGTCCCCCTCCACCCCCTACATGGCACAGGAGGGCCCAGTCCCTCCGGAAGCTTTCTCCTATAGTGA	GCCTGGAAGAGGCCTGGGGTTGCTTCAGCTTCCCGATATCCGACGGTAGTGTNNNNNAACCTCAGAAGCCAACTG	52393240	52393422	+	0	20
INF1_smMIP_DNAH1_83	3:52393861-52394012/16,24/-	0.890737	3	52393997	52394012	CTCAATGACGATTAGC	1	52393861	52393884	CTCACCCTCCCCTTTCACAGAGGG	1	52393885	52393996	GCTGACAGCACTGCCCGCTGCATGCGGGACAGCTTCCCCCGCACAAGGGCCACCAGATCACTGAGCTGCAGAAATGGGGTGCACTGTCAAACATCAGGGTACCACGAGGAGG	CTCACCCTCCCCTTTCACAGAGGGCTTCAGCTTCCCGATATCCGACGGTAGTGTNNNNNCTCAATGACGATTAGC	52393910	52394115	-	0	1
INF1_smMIP_DNAH1_84	3:52393949-52394100/19,21/-	0.883458	3	52394082	52394100	CTCACCTCAGCTGTGAGAT	1	52393949	52393969	GACAGCTTCCCCCGCACAAGG	1	52393970	52394081	CCACTGGAAGTCATTCACGCTGACCACGTTCTCCTGGATTAGCTTGCTCACCACGTCCTTGGCATGGACCTCAATGACGATTAGCGCTGACAGCACTGCCCGCTGCATGCGG	GACAGCTTCCCCCGCACAAGGCTTCAGCTTCCCGATATCCGACGGTAGTGTNNNNNCTCACCTCAGCTGTGAGAT	52393910	52394115	-	0	10
INF1_smMIP_DNAH1_85	3:52394060-52394211/18,22/-	0.88134	3	52394194	52394211	AGCTTGTCCCAGAACCTC	1	52394060	52394081	CCACTGGAAGTCATTCACGCTG	1	52394082	52394193	AAGGACAGAGACCAGCTTATTGCTAACTGACTTTTCTCTTTTCCCCTGCCCCTTCCTGGCAGCTGCTCTGGCCCTGGGGGCGCCCCCCATGTCCTCACCTCAGCTGTGAGAT	CCACTGGAAGTCATTCACGCTGCTTCAGCTTCCCGATATCCGACGGTAGTGTNNNNNAGCTTGTCCCAGAACCTC	52393910	52394115	-	0	1
INF1_smMIP_DNAH1_86	3:52394189-52394340/16,24/+	0.868286	3	52394189	52394204	TCCTTGAGGTTCTGGG	4	52394317	52394340	GCACCGCCAGGTACTACTGGACAA	1	52394205	52394316	ACAAGCTGGGTATGGGTACCTTAATGCCCTCATTCCCAAAAAGAACCCTCTCTCCTTGACTATATACCCTGCCCAGTGGCCCATTGCCCCATGGCCAGGCCCTCATCTCCCT	GCACCGCCAGGTACTACTGGACAACTTCAGCTTCCCGATATCCGACGGTAGTGTNNNNNTCCTTGAGGTTCTGGG	52394305	52394460	+	0	1
INF1_smMIP_DNAH1_87	3:52394292-52394443/22,18/-	0.898928	3	52394422	52394443	TACCTGTCGGTGAGGGGCGTGA	1	52394292	52394309	TGAGGGCCTGGCCATGGG	3	52394310	52394421	TCACCAGCCTCCCACTGTTGCCCAGGTACTCATAGCCATAGATGAACTCAGCATTCACAGCACGGATATACAGGTCATTATTTGTCCAGTAGTACCTGGCGGTGCAGGGAGA	TGAGGGCCTGGCCATGGGCTTCAGCTTCCCGATATCCGACGGTAGTGTNNNNNTACCTGTCGGTGAGGGGCGTGA	52394305	52394460	-	0	20
INF1_smMIP_DNAH1_88	3:52394346-52394497/19,21/-	0.812368	3	52394479	52394497	CAGAGAGAACTAGAGGGAG	1	52394346	52394366	CACAGCACGGATATACAGGTC	1	52394367	52394478	GGTCTCAGTGTGGGAAGGAGCAAGAGGGGAACGCTTACCTGTCGGTGAGGGGCGTGATCACCAGCCTCCCACTGTTGCCCAGGTACTCATAGCCATAGATGAACTCAGCATT	CACAGCACGGATATACAGGTCCTTCAGCTTCCCGATATCCGACGGTAGTGTNNNNNCAGAGAGAACTAGAGGGAG	52394305	52394460	-	0	1
INF1_smMIP_DNAH1_89	3:52395100-52395251/16,24/-	0.798126	3	52395236	52395251	CCTGTGCCAGCTGGGC	10	52395100	52395123	TCCTTGGAATTTCCTGTGGACTGG	1	52395124	52395235	CAGCTGGGGCACCCCCAAACTTGAGGTGCAGAGCTCCGGTCAGTGTCAGGTAGCACCTGCAGGAGACAGAGGAGGTGGGCTCGGGCCGCACATGGCCTGGACACTCCCCCTT	TCCTTGGAATTTCCTGTGGACTGGCTTCAGCTTCCCGATATCCGACGGTAGTGTNNNNNCCTGTGCCAGCTGGGC	52395158	52395388	-	0	10
INF1_smMIP_DNAH1_90	3:52395208-52395359/16,24/-	0.885768	3	52395344	52395359	CCCTTGAAGAACTTGC	6	52395208	52395231	TGGGGCACCCCCAAACTTGAGGTG	1	52395232	52395343	CCATGGCCATGAAGTCGAGCTGGTCAGAGCAGTTGAACACAACGGTCTGTATGGCCAAGGCCTTACCCAGGTCTTTGGTGGTCTCAGTTTTGCCTGTGCCAGCTGGGCCAGC	TGGGGCACCCCCAAACTTGAGGTGCTTCAGCTTCCCGATATCCGACGGTAGTGTNNNNNCCCTTGAAGAACTTGC	52395158	52395388	-	0	20
INF1_smMIP_DNAH1_91	3:52395257-52395408/19,21/-	0.885841	3	52395390	52395408	GTCCCACCCCATCCTGTGC	2	52395257	52395277	CCAGGTCTTTGGTGGTCTCAG	1	52395278	52395389	CACGCTCATGCCCAGCCTCACCTGGCCAGGCCCTTGAAGAACTTGCCCATGGCCATGAAGTCGAGCTGGTCAGAGCAGTTGAACACAACGGTCTGTATGGCCAAGGCCTTAC	CCAGGTCTTTGGTGGTCTCAGCTTCAGCTTCCCGATATCCGACGGTAGTGTNNNNNGTCCCACCCCATCCTGTGC	52395158	52395388	-	0	1
INF1_smMIP_DNAH1_92	3:52395605-52395756/16,24/-	0.772219	3	52395741	52395756	TGGTGATCTGCTGCGC	1	52395605	52395628	TCTGGGCACCTCCCTCTGAGGGCC	1	52395629	52395740	CACCACAGACAGCACCTCGATGTCGATGCGATTGAACTCGTCGAAGCAGGCCCAGGCCCCAGCACTGAGTGAGGCCGGAACATTGGATGGGGCACATGTGTTCAGAGCCCAA	TCTGGGCACCTCCCTCTGAGGGCCCTTCAGCTTCCCGATATCCGACGGTAGTGTNNNNNTGGTGATCTGCTGCGC	52395655	52395802	-	0	20
INF1_smMIP_DNAH1_93	3:52395715-52395866/16,24/-	0.821342	3	52395851	52395866	TGGCTTCTCAGCCTGC	8	52395715	52395738	CCACAGACAGCACCTCGATGTCGA	1	52395739	52395850	AATGGGGAGCAGTATGGCGGCGTGAGTATGGCAGATCTGAGGGAGTAAGGTGGGTCCCCCGGGCTCACCCGCTGCTGCTGCGCCTTCTGGATGGTGGTGATCTGCTGCGCCA	CCACAGACAGCACCTCGATGTCGACTTCAGCTTCCCGATATCCGACGGTAGTGTNNNNNTGGCTTCTCAGCCTGC	52395655	52395802	-	0	5
INF1_smMIP_DNAH1_94	3:52396290-52396441/18,22/-	0.785128	3	52396424	52396441	AGTGGGATCTCCACACCC	1	52396290	52396311	GTCCTGGCTGTAGCTGGTAGGC	1	52396312	52396423	TCAAACATGAAGCGTTCCACCTGCAGTGGGGAGAGGCTGACTTGCCTGGGACTAGGGTGCCCAGCCTTGTCCCCTCCTCTGAGTGGGCCCCTTGTCCCCTGTTGATGCCCCT	GTCCTGGCTGTAGCTGGTAGGCCTTCAGCTTCCCGATATCCGACGGTAGTGTNNNNNAGTGGGATCTCCACACCC	52396382	52396537	-	0	20
INF1_smMIP_DNAH1_95	3:52396363-52396514/16,24/-	0.812326	3	52396499	52396514	CAGATTGTCAGGCAGC	1	52396363	52396386	TGACTTGCCTGGGACTAGGGTGCC	1	52396387	52396498	TCCGTGCGGCCAGCGTAGCCCGGGTTCATGGTGATAAACACTGCGCAGGATGGCACCAGTGGGATCTCCACACCCTCAAACATGAAGCGTTCCACCTGCAGTGGGGAGAGGC	TGACTTGCCTGGGACTAGGGTGCCCTTCAGCTTCCCGATATCCGACGGTAGTGTNNNNNCAGATTGTCAGGCAGC	52396382	52396537	-	0	5
INF1_smMIP_DNAH1_96	3:52396416-52396567/16,24/+	0.878887	3	52396416	52396431	ATGTTTGAGGGTGTGG	5	52396544	52396567	GAAGCACCAGAGCTCTAGCCTGAG	1	52396432	52396543	AGATCCCACTGGTGCCATCCTGCGCAGTGTTTATCACCATGAACCCGGGCTACGCTGGCCGCACGGAGCTGCCTGACAATCTGAAGGCAAGTGCAGGCCCAGAGTGGCCCAG	GAAGCACCAGAGCTCTAGCCTGAGCTTCAGCTTCCCGATATCCGACGGTAGTGTNNNNNATGTTTGAGGGTGTGG	52396382	52396537	+	0	1
INF1_smMIP_DNAH1_97	3:52396973-52397124/16,24/+	0.920775	3	52396973	52396988	GCTCTGTTTGCTGTTC	4	52397101	52397124	GTGCTGGCTAAGAAGATCACAACC	1	52396989	52397100	ACATGTGCACTGTGTGTCCCAGGCGCTCTTCCGACCCGTGGCCATGATGGTTCCAGATTACGCCATGATCACTGAGATCTCCCTCTATTCCTTTGGCTTTAATGAGGCCAGT	GTGCTGGCTAAGAAGATCACAACCCTTCAGCTTCCCGATATCCGACGGTAGTGTNNNNNGCTCTGTTTGCTGTTC	52396989	52397180	+	0	1
INF1_smMIP_DNAH1_98	3:52397080-52397231/22,18/-	0.83667	3	52397210	52397231	GCAGGTGCCCTGGAGGCTGGGA	1	52397080	52397097	GGCCTCATTAAAGCCAAA	2	52397098	52397209	GCAGGCAGAAGTTTTCAGACCCTGGAAACCCATCAGGGCAGGACCACACCTGGGAGCTGAGCTGCTCAGAAGACAGCTTGAAGGTGGTTGTGATCTTCTTAGCCAGCACACT	GGCCTCATTAAAGCCAAACTTCAGCTTCCCGATATCCGACGGTAGTGTNNNNNGCAGGTGCCCTGGAGGCTGGGA	52396989	52397180	-	0	10
INF1_smMIP_DNAH1_99	3:52397106-52397257/16,24/-	0.84844	3	52397242	52397257	GCACCGGGCATAGAGC	2	52397106	52397129	AAGGTGGTTGTGATCTTCTTAGCC	1	52397130	52397241	CTGGCCCTCAGCAGGTGCCCTGGAGGCTGGGAGCAGGCAGAAGTTTTCAGACCCTGGAAACCCATCAGGGCAGGACCACACCTGGGAGCTGAGCTGCTCAGAAGACAGCTTG	AAGGTGGTTGTGATCTTCTTAGCCCTTCAGCTTCCCGATATCCGACGGTAGTGTNNNNNGCACCGGGCATAGAGC	52396989	52397180	-	0	1
INF1_smMIP_DNAH1_100	3:52398608-52398759/19,21/+	0.904327	3	52398608	52398626	TGGAGAGGGACAGTGCTCA	1	52398739	52398759	AGGTGAGCTCCACCCAGCAGG	1	52398627	52398738	CCCATGCCTCCTTCTGTATGGCGACAGGATCACTATGACTTCGGGATGAGAGCCGTGAAAACTGTGATCTCGGCTGCTGGGAACCTCAAGCGAGAAAACCCCAGCATGAATG	AGGTGAGCTCCACCCAGCAGGCTTCAGCTTCCCGATATCCGACGGTAGTGTNNNNNTGGAGAGGGACAGTGCTCA	52398632	52399055	+	0	1
INF1_smMIP_DNAH1_101	3:52398706-52398857/16,24/-	0.706531	3	52398842	52398857	GATCAGCTCCTGCAGC	2	52398706	52398729	TGGGGTTTTCTCGCTTGAGGTTCC	1	52398730	52398841	AGGTGCCGGCTGAGCCTTCAGGGCAGTGGGCCAGCTGCCCTCCAGCTGCCCAGGAGCCCTCCCAGAGTTCCACTCCTGGAGCCCTGCTGGGTGGAGCTCACCTCATTCATGC	TGGGGTTTTCTCGCTTGAGGTTCCCTTCAGCTTCCCGATATCCGACGGTAGTGTNNNNNGATCAGCTCCTGCAGC	52398632	52399055	-	0	1
INF1_smMIP_DNAH1_102	3:52398811-52398962/18,22/-	0.669999	3	52398945	52398962	CTCCTCCTTGATGGTGGG	1	52398811	52398832	CTGAGCCTTCAGGGCAGTGGGC	1	52398833	52398944	AAACAGGTCGGACACGATGCCAGAGAAGAGCTTGAGGTCCTCCTGCAGGAACTTGGGCACGTTCACATCACGGATGGCCCGGAGGCAGATCAGCTCCTGCAGCAGGTGCCGG	CTGAGCCTTCAGGGCAGTGGGCCTTCAGCTTCCCGATATCCGACGGTAGTGTNNNNNCTCCTCCTTGATGGTGGG	52398632	52399055	-	0	1
INF1_smMIP_DNAH1_103	3:52398866-52399017/16,24/-	0.811419	3	52399002	52399017	TGCTGTTCCTGCAGGC	5	52398866	52398889	GGCACGTTCACATCACGGATGGCC	1	52398890	52399001	CTCGCGGATGGCCTCATCCAGGATGCCGTAGTCCGTGTCCTCCTCCTTGATGGTGGGAAACAGGTCGGACACGATGCCAGAGAAGAGCTTGAGGTCCTCCTGCAGGAACTTG	GGCACGTTCACATCACGGATGGCCCTTCAGCTTCCCGATATCCGACGGTAGTGTNNNNNTGCTGTTCCTGCAGGC	52398632	52399055	-	0	1
INF1_smMIP_DNAH1_104	3:52398952-52399103/18,22/+	0.77952	3	52398952	52398969	TCAAGGAGGAGGACACGG	1	52399082	52399103	CCTTGGAGTCCAGGTCAGGGGG	1	52398970	52399081	ACTACGGCATCCTGGATGAGGCCATCCGCGAGGCCTGCAGGAACAGCAACCTCAAGGATGTGGAGGGTGAGCCTCGGGCCCTGAGTGTTCGTGGAGGGGCTGGCCATGGCCA	CCTTGGAGTCCAGGTCAGGGGGCTTCAGCTTCCCGATATCCGACGGTAGTGTNNNNNTCAAGGAGGAGGACACGG	52398632	52399055	+	0	10
INF1_smMIP_DNAH1_105	3:52400367-52400518/16,24/+	0.857235	3	52400367	52400382	TGAGGCTCAGGGAGTG	20	52400495	52400518	GCTCTACGAGACCACGGTGGTACG	1	52400383	52400494	CAGTGACTCACCCAAGGTCACACAAGTTAGTGGTGTGGCCAGGACCCAAGCCCATGCTCTGACCCTTGGGCCCCATGCCATGTCCCCCAGGCTTCCTGACAAAGTGCATCCA	GCTCTACGAGACCACGGTGGTACGCTTCAGCTTCCCGATATCCGACGGTAGTGTNNNNNTGAGGCTCAGGGAGTG	52400451	52400584	+	0	1
INF1_smMIP_DNAH1_106	3:52400470-52400621/16,24/-	0.828668	3	52400606	52400621	GCACCCCCCTACAGGC	3	52400470	52400493	GGATGCACTTTGTCAGGAAGCCTG	1	52400494	52400605	CCACTATCCGGACACTGGCTGCCAAGCTTGGCTCTGCTTACAGTACTCTTGCCGGAGCCTGTGGGCCCGACGAGCATGAGGCCGTGTCGTACCACCGTGGTCTCGTAGAGCT	GGATGCACTTTGTCAGGAAGCCTGCTTCAGCTTCCCGATATCCGACGGTAGTGTNNNNNGCACCCCCCTACAGGC	52400451	52400584	-	0	1
INF1_smMIP_DNAH1_107	3:52400708-52400859/16,24/+	0.873199	3	52400708	52400723	TGCTCTCTGGGAGCCT	12	52400836	52400859	GTGCTCAACCCCAAGTCCATCACG	1	52400724	52400835	CACTCTCAGGCGGTCCGTCTCCCAGTGTTACAGAGTCCTGGCAGCTGCCATGACGTCACTGAAAGGGCAGCCATCCATCAGTGGTGGCATGTACGAGGCTGTCAACTACTAC	GTGCTCAACCCCAAGTCCATCACGCTTCAGCTTCCCGATATCCGACGGTAGTGTNNNNNTGCTCTCTGGGAGCCT	52400727	52400923	+	0	10
INF1_smMIP_DNAH1_108	3:52400743-52400894/21,19/-	0.82923	3	52400874	52400894	GTGAGGAGGTCAAACTCCCCG	1	52400743	52400761	GGACTCTGTAACACTGGGA	1	52400762	52400873	TACAGCTGGCCCATCGTGATGGACTTGGGGTTGAGCACGTAGTAGTTGACAGCCTCGTACATGCCACCACTGATGGATGGCTGCCCTTTCAGTGACGTCATGGCAGCTGCCA	GGACTCTGTAACACTGGGACTTCAGCTTCCCGATATCCGACGGTAGTGTNNNNNGTGAGGAGGTCAAACTCCCCG	52400727	52400923	-	0	1
INF1_smMIP_DNAH1_109	3:52400837-52400988/19,21/-	0.573662	3	52400970	52400988	CTAATGGAGGGAGGGGTGA	1	52400837	52400857	TGATGGACTTGGGGTTGAGCA	1	52400858	52400969	CCGCAGCCCACAGCCTCCAGAGGTCTGGGAGCAGGGGGTCACCGGTGAGGCTGGGGGGTCACTCACCACTCATGGGTGAGGAGGTCAAACTCCCCGTACAGCTGGCCCATCG	TGATGGACTTGGGGTTGAGCACTTCAGCTTCCCGATATCCGACGGTAGTGTNNNNNCTAATGGAGGGAGGGGTGA	52400727	52400923	-	0	1
INF1_smMIP_DNAH1_110	3:52402712-52402863/16,24/-	0.727388	3	52402848	52402863	TCTCAATCCAGATGGC	3	52402712	52402735	GGCTGGAAACATCAGGGAGGCGGT	1	52402736	52402847	ATCCACCGGCCCATCGAACATGTACCACTTCTTGTTGGTGTCGGAGGTGATGGCCCCCGCCCGGATGAACGAGGAGAATATCCCGTCTGTCCTGCAGCGCCAGGGAGGAGAG	GGCTGGAAACATCAGGGAGGCGGTCTTCAGCTTCCCGATATCCGACGGTAGTGTNNNNNTCTCAATCCAGATGGC	52402735	52402954	-	0	1
INF1_smMIP_DNAH1_111	3:52402820-52402971/16,24/-	0.889884	3	52402956	52402971	CTTGGAGGAGAGTGGG	9	52402820	52402843	ACCGGCCCATCGAACATGTACCAC	1	52402844	52402955	CAGGTGGACAGGTAGGTGCACCTCTGTGAGCTTGATGATCTCCCCAGAGCTGAGGCACAGCTTCTTGTTGTCATCCAGCACCGTGTTCATGTTCTCAATCCAGATGGCATCC	ACCGGCCCATCGAACATGTACCACCTTCAGCTTCCCGATATCCGACGGTAGTGTNNNNNCTTGGAGGAGAGTGGG	52402735	52402954	-	0	1
INF1_smMIP_DNAH1_112	3:52403772-52403923/16,24/-	0.858788	3	52403908	52403923	TCCAGGTACACCATGC	2	52403772	52403795	AGGCCTGGAGAAAGGGCTGCAGGG	1	52403796	52403907	CACAGCGGGAGACTGTAGCTGGTGAAGCCACCGCCAGGTCTTGCACCTCGAACATCATGGTCATTGCCTGGTGCCAAGACGAACCAAATGAGTGGGCTGGCTGCCAGTCCTC	AGGCCTGGAGAAAGGGCTGCAGGGCTTCAGCTTCCCGATATCCGACGGTAGTGTNNNNNTCCAGGTACACCATGC	52403819	52404265	-	0	1
INF1_smMIP_DNAH1_113	3:52403823-52403974/21,19/-	0.845899	3	52403954	52403974	AGCTTCCTCAGCCAGCACTCG	1	52403823	52403841	CCTGGTGCCAAGACGAACC	1	52403842	52403953	ATGAAGGGCATGAGCCCCAGGATGCTGGGCTCCAGGTACACCATGCCACAGCGGGAGACTGTAGCTGGTGAAGCCACCGCCAGGTCTTGCACCTCGAACATCATGGTCATTG	CCTGGTGCCAAGACGAACCCTTCAGCTTCCCGATATCCGACGGTAGTGTNNNNNAGCTTCCTCAGCCAGCACTCG	52403819	52404265	-	0	5
INF1_smMIP_DNAH1_114b	3:52403904-52404055/19,21/+	0.901817	3	52403904	52403922	TGTGGCATGGTGTACCTGG	1	52404035	52404055	GGTGAGTGAGGCCACAGGTAT	1	52403923	52404034	AGCCCAGCATCCTGGGGCTCATGCCCTTCATCGAGTGCTGGCTGAGGAAGCTGCCTCCCTTGCTGAAGCCCTATGAGGAGCATTTCAAGGCCCTCTTTGTCAGCTTCCTGGA	GGTGAGTGAGGCCACAGGTATCTTCAGCTTCCCGATATCCGACGGTAGTGTNNNNNTGTGGCATGGTGTACCTGG	52403819	52404265	+	0	1
INF1_smMIP_DNAH1_114	3:52403904-52404055/19,21/+	0.901817	3	52403904	52403922	TGTGGCATGGTGTACCTGG	1	52404035	52404055	GGTGAGTGAGGCCACGGGTAT	1	52403923	52404034	AGCCCAGCATCCTGGGGCTCATGCCCTTCATCGAGTGCTGGCTGAGGAAGCTGCCTCCCTTGCTGAAGCCCTATGAGGAGCATTTCAAGGCCCTCTTTGTCAGCTTCCTGGA	GGTGAGTGAGGCCACGGGTATCTTCAGCTTCCCGATATCCGACGGTAGTGTNNNNNTGTGGCATGGTGTACCTGG	52403819	52404265	+	0	1
INF1_smMIP_DNAH1_115	3:52403957-52404108/16,24/+	0.867498	3	52403957	52403972	GTGCTGGCTGAGGAAG	11	52404085	52404108	GTGGCTGCCAGCCATGAGAACTGG	1	52403973	52404084	CTGCCTCCCTTGCTGAAGCCCTATGAGGAGCATTTCAAGGCCCTCTTTGTCAGCTTCCTGGAGGTGAGTGAGGCCACGGGTATGTCTGACCCTGGCAGGGCAGCAGGGCACT	GTGGCTGCCAGCCATGAGAACTGGCTTCAGCTTCCCGATATCCGACGGTAGTGTNNNNNGTGCTGGCTGAGGAAG	52403819	52404265	+	0	20
INF1_smMIP_DNAH1_116	3:52404016-52404167/16,24/+	0.853443	3	52404016	52404031	TCTTTGTCAGCTTCCT	12	52404144	52404167	CGGTCCTCAGTGAAGGAGGTGATC	1	52404032	52404143	GGAGGTGAGTGAGGCCACGGGTATGTCTGACCCTGGCAGGGCAGCAGGGCACTGTGGCTGCCAGCCATGAGAACTGGGTGCCTACTCCCTGCAGGAATCCATCTCCTTCGTT	CGGTCCTCAGTGAAGGAGGTGATCCTTCAGCTTCCCGATATCCGACGGTAGTGTNNNNNTCTTTGTCAGCTTCCT	52403819	52404265	+	0	1
INF1_smMIP_DNAH1_117	3:52404115-52404266/16,24/-	0.862611	3	52404251	52404266	GCCCCACTCTCAGGGC	7	52404115	52404138	AGGAGATGGATTCCTGCAGGGAGT	1	52404139	52404250	TGTACCTCTCTAGGCAGAAAGGGCTTGAAGAAGCAGTCCAGCAGCTTGAGGAGGCTCATGGTCAGGTTGCAGTTGGTTGAGGCGATCACCTCCTTCACTGAGGACCGAACGA	AGGAGATGGATTCCTGCAGGGAGTCTTCAGCTTCCCGATATCCGACGGTAGTGTNNNNNGCCCCACTCTCAGGGC	52403819	52404265	-	0	1
INF1_smMIP_DNAH1_118	3:52404214-52404365/16,24/-	0.872915	3	52404350	52404365	GTCTTGTCCATGTTGC	3	52404214	52404237	GCAGAAAGGGCTTGAAGAAGCAGT	1	52404238	52404349	ACCATGTTGCACCAATCCAATTCTCTCTTTCAGGCCCCAGAGAGCAAGGAGAGCAGTGTGGGGAGAGGGACCAGGTGCATCTAGCCCCACTCTCAGGGCTGTACCTCTCTAG	GCAGAAAGGGCTTGAAGAAGCAGTCTTCAGCTTCCCGATATCCGACGGTAGTGTNNNNNGTCTTGTCCATGTTGC	52403819	52404265	-	0	1
INF1_smMIP_DNAH1_119	3:52404416-52404567/16,24/-	0.89263	3	52404552	52404567	CAGGGAGAAGATGAAC	5	52404416	52404439	TGAGGAAGTGGGGCAGGGGCATGT	1	52404440	52404551	CAGGGCTCGATCAACTCTACGATGCGACTCAGCTTTTCAGAGGGTATTTTCTTGAGGCCCTGGGGATGAAGGGAACAGTATCAGGCTGAGACAGGAACAGTATCAAGCGGCC	TGAGGAAGTGGGGCAGGGGCATGTCTTCAGCTTCCCGATATCCGACGGTAGTGTNNNNNCAGGGAGAAGATGAAC	52404471	52404861	-	0	1
INF1_smMIP_DNAH1_120	3:52404514-52404665/16,24/+	0.862034	3	52404514	52404529	GAAAAGCTGAGTCGCA	1	52404642	52404665	GAACGAACAGGTGAGAGCCGGCGG	1	52404530	52404641	TCGTAGAGTTGATCGAGCCCTGGTTCATCTTCTCCCTGATCTGGAGCGTGGGTGCCACTGGGGACAGCAGTGGCCGCACCAGTTTCAGCCACTGGCTAAGGCTCAAGATGGA	GAACGAACAGGTGAGAGCCGGCGGCTTCAGCTTCCCGATATCCGACGGTAGTGTNNNNNGAAAAGCTGAGTCGCA	52404471	52404861	+	0	1
INF1_smMIP_DNAH1_120b	3:52404514-52404665/16,24/+	0.862034	3	52404514	52404529	GAAAAGCTGAGTCGCA	1	52404642	52404665	GAATGAACAGGTGAGAGCCGGCGG	1	52404530	52404641	TCGTAGAGTTGATCGAGCCCTGGTTCATCTTCTCCCTGATCTGGAGCGTGGGTGCCACTGGGGACAGCAGTGGCCGCACCAGTTTCAGCCACTGGCTAAGGCTCAAGATGGA	GAATGAACAGGTGAGAGCCGGCGGCTTCAGCTTCCCGATATCCGACGGTAGTGTNNNNNGAAAAGCTGAGTCGCA	52404471	52404861	+	0	1
INF1_smMIP_DNAH1_121	3:52404553-52404704/16,24/+	0.833785	3	52404553	52404568	TTCATCTTCTCCCTGA	15	52404681	52404704	AGCCTCAGTCCTACTGGGCCTCAC	1	52404569	52404680	TCTGGAGCGTGGGTGCCACTGGGGACAGCAGTGGCCGCACCAGTTTCAGCCACTGGCTAAGGCTCAAGATGGAGAACGAACAGGTGAGAGCCGGCGGCCCCCAGGGACCAGG	AGCCTCAGTCCTACTGGGCCTCACCTTCAGCTTCCCGATATCCGACGGTAGTGTNNNNNTTCATCTTCTCCCTGA	52404471	52404861	+	0	1
INF1_smMIP_DNAH1_122	3:52404619-52404770/16,24/-	0.789188	3	52404755	52404770	CGAACACCAGCCCCTC	3	52404619	52404642	CTCCATCTTGAGCCTTAGCCAGTG	1	52404643	52404754	TTCTGGGAAAAGCAGAGTCAGCTGCCGGGAACCAGGAGGAGAAGCAGGCTGTGAGGCCCAGTAGGACTGAGGCTCCTGGTCCCTGGGGGCCGCCGGCTCTCACCTGTTCGTT	CTCCATCTTGAGCCTTAGCCAGTGCTTCAGCTTCCCGATATCCGACGGTAGTGTNNNNNCGAACACCAGCCCCTC	52404471	52404861	-	0	1
INF1_smMIP_DNAH1_123	3:52404725-52404876/22,18/-	0.855141	3	52404855	52404876	TCCCTGTGCAGTCTCTGGGGAG	1	52404725	52404742	CAGAGTCAGCTGCCGGGA	1	52404743	52404854	GGCCTGCGGCCACCTGCTTGTATTCCTCCTCTTCATCCTCACTGTCGTTGGTGCCACTGATGCCCGCGTCCTCCAGCCTGTAATCGAACACCAGCCCCTCTTCTGGGAAAAG	CAGAGTCAGCTGCCGGGACTTCAGCTTCCCGATATCCGACGGTAGTGTNNNNNTCCCTGTGCAGTCTCTGGGGAG	52404471	52404861	-	0	1
INF1_smMIP_DNAH1_124	3:52404755-52404906/16,24/+	0.901169	3	52404755	52404770	GAGGGGCTGGTGTTCG	3	52404883	52404906	ACTGGGTGGCTGCTGTTCCCGCAA	1	52404771	52404882	ATTACAGGCTGGAGGACGCGGGCATCAGTGGCACCAACGACAGTGAGGATGAAGAGGAGGAATACAAGCAGGTGGCCGCAGGCCCTCCCCAGAGACTGCACAGGGAGGGACC	ACTGGGTGGCTGCTGTTCCCGCAACTTCAGCTTCCCGATATCCGACGGTAGTGTNNNNNGAGGGGCTGGTGTTCG	52404471	52404861	+	0	1
INF1_smMIP_DNAH1_125	3:52405914-52406065/18,22/-	0.817515	3	52406048	52406065	GACATCTGCACGGTGTCC	1	52405914	52405935	GGCCTGGAACCCCTCCCTGCCC	1	52405936	52406047	ATGGTGGGCACAATGATGTTGCAGTAGTTGGTGTCTGGTACCATGGTGAATGGAGCTGAGGAGTCCATCCACTTCACCCAGGCAACCTGGAATCATAGGTGGCTCAGCAGTG	GGCCTGGAACCCCTCCCTGCCCCTTCAGCTTCCCGATATCCGACGGTAGTGTNNNNNGACATCTGCACGGTGTCC	52405940	52406122	-	0	1
INF1_smMIP_DNAH1_126	3:52406006-52406157/16,24/-	0.730612	3	52406142	52406157	AACCCCCAATATAGGC	1	52406006	52406029	TTGCAGTAGTTGGTGTCTGGTACC	1	52406030	52406141	CTTGGGGACAGTGGAGGCAGGGCCTGGGGGGGTGCTCACGGGCTTCTTGTTGGTGAGCAGCATGTCCAGTAAATGGGACATCTGCACGGTGTCCATGGTGGGCACAATGATG	TTGCAGTAGTTGGTGTCTGGTACCCTTCAGCTTCCCGATATCCGACGGTAGTGTNNNNNAACCCCCAATATAGGC	52405940	52406122	-	0	1
INF1_smMIP_DNAH1_127	3:52406198-52406349/16,24/-	0.696534	3	52406334	52406349	GCTGAGAAGGTGAGGA	6	52406198	52406221	AGGAGCATGCGGTGGGCCTGGTGC	1	52406222	52406333	AGTGGCTGATGTAATCCAGTGCCAGGTTCTTGAGGAGCTTGTCAGAGATGGTGAGCGTCTTCCCCGTGCCTGTTGGCCCAATGCACAGCACCTGGCAGAGCGGGGATGGCAC	AGGAGCATGCGGTGGGCCTGGTGCCTTCAGCTTCCCGATATCCGACGGTAGTGTNNNNNGCTGAGAAGGTGAGGA	52406221	52406423	-	0	1
INF1_smMIP_DNAH1_128	3:52406285-52406436/22,18/-	0.829402	3	52406415	52406436	GCAGGGGTGAGGAAGGAGGGAG	1	52406285	52406302	GAGGAGCTTGTCAGAGAT	1	52406303	52406414	GGGTGCCCTGCCTCTTGTCCAGCTTGCTGTCAATGAAGTCCTGGGTCTGGTTGGCTGAAGTGCGGGCTGAGAAGGTGAGGAAGTGGCTGATGTAATCCAGTGCCAGGTTCTT	GAGGAGCTTGTCAGAGATCTTCAGCTTCCCGATATCCGACGGTAGTGTNNNNNGCAGGGGTGAGGAAGGAGGGAG	52406221	52406423	-	0	1
INF1_smMIP_DNAH1_129	3:52406332-52406483/16,24/+	0.721234	3	52406332	52406347	CTTCCTCACCTTCTCA	14	52406460	52406483	GCTGCTGTCCCACCTCTCCACCAA	1	52406348	52406459	GCCCGCACTTCAGCCAACCAGACCCAGGACTTCATTGACAGCAAGCTGGACAAGAGGCAGGGCACCCCTCCCTCCTTCCTCACCCCTGCATCCTCCCAGCCTGGCCGATCCA	GCTGCTGTCCCACCTCTCCACCAACTTCAGCTTCCCGATATCCGACGGTAGTGTNNNNNCTTCCTCACCTTCTCA	52406221	52406423	+	0	1
INF1_smMIP_DNAH1_130	3:52406862-52407013/16,24/-	0.875552	3	52406998	52407013	ATGGGTGGCTGTGCAC	2	52406862	52406885	GCACCCACAGGCACCAGGTCCTCT	1	52406886	52406997	CGTAGGTCTCCAGGGCCGGCATGTTCAGGTCATCGATGAAGAAGATAAAGTTGCGCCCCAGAGGTGGTCCAAACACACCCTTCCGCCTGAGGGGAGGGGCTGTGTGAGCCCA	GCACCCACAGGCACCAGGTCCTCTCTTCAGCTTCCCGATATCCGACGGTAGTGTNNNNNATGGGTGGCTGTGCAC	52406890	52407089	-	0	1
INF1_smMIP_DNAH1_131	3:52406961-52407112/18,22/-	0.673216	3	52407095	52407112	CACGCGTAGCCCTTGCCC	1	52406961	52406982	CCGGCATGTTCAGGTCATCGAT	1	52406983	52407094	TGTGAGCCAGGCCGGCCACACTCACCAATGATCTTGCGGTCGTACCAGCCGCCGTGGTCCATCCACTGGCGCAACAGCTCGATGGGTGGCTGTGCACCGTAGGTCTCCAGGG	CCGGCATGTTCAGGTCATCGATCTTCAGCTTCCCGATATCCGACGGTAGTGTNNNNNCACGCGTAGCCCTTGCCC	52406890	52407089	-	0	1
INF1_smMIP_DNAH1_132	3:52409137-52409288/16,24/-	0.858448	3	52409273	52409288	CAAAGTTGATGTCCAC	3	52409137	52409160	TAGAACAGTACTGGAATAAAGACA	1	52409161	52409272	TAGGTTCTTGAAGGCACCTGGAGTAGGGGCAGGAAGTCAGGAAGGGCCCTGGCCAGGGCTGCATTATGACCTTTGTGGCCCCTTCTCCATACAAAAATTCAAAATTATACTT	TAGAACAGTACTGGAATAAAGACACTTCAGCTTCCCGATATCCGACGGTAGTGTNNNNNCAAAGTTGATGTCCAC	52409234	52409449	-	0	1
INF1_smMIP_DNAH1_133	3:52409219-52409370/16,24/-	0.855206	3	52409355	52409370	GCGAAAGACAGGTAGT	1	52409219	52409242	AGGAAGTCAGGAAGGGCCCTGGCC	1	52409243	52409354	TGAAGTGACGCATCAGCCGCGGGGTGACGGTGTTCCTGCCTCCACCCGGGGGGCCCATGGCACAGACAAAGTTGATGTCCACTAGGTTCTTGAAGGCACCTGGAGTAGGGGC	AGGAAGTCAGGAAGGGCCCTGGCCCTTCAGCTTCCCGATATCCGACGGTAGTGTNNNNNGCGAAAGACAGGTAGT	52409234	52409449	-	0	20
INF1_smMIP_DNAH1_134	3:52409331-52409482/18,22/-	0.85477	3	52409465	52409482	CTCCCTGGCCTGGGCTTC	1	52409331	52409352	AAGTGACGCATCAGCCGCGGGG	1	52409353	52409464	TGCCTTTGTCCATGCTCACCCCCACCAATACTCACCCAACCAGTTGCCCAGGATGGTGGAGAAGATGCGTTTCTTGCTGACCTCGTCCATCTCAGCGAAAGACAGGTAGTTG	AAGTGACGCATCAGCCGCGGGGCTTCAGCTTCCCGATATCCGACGGTAGTGTNNNNNCTCCCTGGCCTGGGCTTC	52409234	52409449	-	0	1
INF1_smMIP_DNAH1_135	3:52409840-52409991/16,24/-	0.864612	3	52409976	52409991	TTTTTTCTCCAAGGAG	13	52409840	52409863	CCCCAAACCCCATAAAGGCTCAGA	1	52409864	52409975	TCCATCTAGAGGATGGAGGGAGAAACACGGGGCTCAGGGTTAGGTGGACCTCTTGCTGCTCACCCTGGCCAGGTGAGATGGTGGGGGAAACAGCATCTTGGGGTAAGCTTTT	CCCCAAACCCCATAAAGGCTCAGACTTCAGCTTCCCGATATCCGACGGTAGTGTNNNNNTTTTTTCTCCAAGGAG	52409949	52410029	-	0	1
INF1_smMIP_DNAH1_136	3:52409935-52410086/20,20/-	0.844033	3	52410067	52410086	CAGCCTCAACACACCCAACC	1	52409935	52409954	GAAACACGGGGCTCAGGGTT	1	52409955	52410066	AGAGCCCAGGGCTCCTCCTGGAACCAGTGCCCCATTCCCGCCCAGGCCCACACTTACGCACACGCTCCCGGTAGCTTTTTTCTCCAAGGAGTCCATCTAGAGGATGGAGGGA	GAAACACGGGGCTCAGGGTTCTTCAGCTTCCCGATATCCGACGGTAGTGTNNNNNCAGCCTCAACACACCCAACC	52409949	52410029	-	0	1
INF1_smMIP_DNAH1_137	3:52412526-52412677/16,24/-	0.674507	3	52412662	52412677	ACACCATGATGGTGGC	2	52412526	52412549	CCTCCTTGCCTTTGCTGTGCTGTG	1	52412550	52412661	TTCCACAAGGGGCTCCGTGAAGTGGGCAATGTGGGGGGCCCCAGCTGGGGGAATAGGAGAATGGCCTGGGTCACATGCCAGGAGCTCCCTCTGCCGCCTCTGCAGGTCCTGA	CCTCCTTGCCTTTGCTGTGCTGTGCTTCAGCTTCCCGATATCCGACGGTAGTGTNNNNNACACCATGATGGTGGC	52412596	52412816	-	0	1
INF1_smMIP_DNAH1_138	3:52412638-52412789/20,20/-	0.61029	3	52412770	52412789	TTGGCCGGGTCAGCCATGAG	1	52412638	52412657	ACAAGGGGCTCCGTGAAGTG	1	52412658	52412769	CATGCCTTGGAAGACCTTGGAGAGGTCCCTCAGGTTGAAGGTGTAGTGGGACTTGGCTGGAGTGGGCAGCAGCTGGGAGGTGATGGTTGCATACACCATGATGGTGGCTTCC	ACAAGGGGCTCCGTGAAGTGCTTCAGCTTCCCGATATCCGACGGTAGTGTNNNNNTTGGCCGGGTCAGCCATGAG	52412596	52412816	-	0	1
INF1_smMIP_DNAH1_139	3:52412715-52412866/22,18/-	0.691858	3	52412845	52412866	AAATTGGTGGGGCTGGGGAGGA	1	52412715	52412732	AAGGTGTAGTGGGACTTG	1	52412733	52412844	TGCGGAGAGCAGTGTGGGCACTGGGGAGGGTGCCTGCCTGGTCCTCACCTCGACCTTGGCCGGGTCAGCCATGAGCATGCCTTGGAAGACCTTGGAGAGGTCCCTCAGGTTG	AAGGTGTAGTGGGACTTGCTTCAGCTTCCCGATATCCGACGGTAGTGTNNNNNAAATTGGTGGGGCTGGGGAGGA	52412596	52412816	-	0	1
INF1_smMIP_DNAH1_140	3:52413842-52413993/16,24/-	0.875625	3	52413978	52413993	CCTCATTCACCAGTCG	2	52413842	52413865	CTCAAACCACCAGGCAAGGGAGGG	1	52413866	52413977	GTCCCGGAACACGCGGCAGTTCTCGTGATACCACAGTCGCAGCAGCTGCACTTGGTCCTGCAGTAGCCCCAGCATCGGTGCCTGTCCTTGGCCCCCAAGCCCTCAGCTATCT	CTCAAACCACCAGGCAAGGGAGGGCTTCAGCTTCCCGATATCCGACGGTAGTGTNNNNNCCTCATTCACCAGTCG	52413899	52414171	-	0	20
INF1_smMIP_DNAH1_141	3:52413902-52414053/16,24/+	0.864279	3	52413902	52413917	GATGCTGGGGCTACTG	2	52414030	52414053	GCATGGAGCAGTGGGAGGTGACCT	1	52413918	52414029	CAGGACCAAGTGCAGCTGCTGCGACTGTGGTATCACGAGAACTGCCGCGTGTTCCGGGACCGACTGGTGAATGAGGAGGACCGCAGCTGGTTCGACCAGCTCCTCAAGCGCT	GCATGGAGCAGTGGGAGGTGACCTCTTCAGCTTCCCGATATCCGACGGTAGTGTNNNNNGATGCTGGGGCTACTG	52413899	52414171	+	0	1
INF1_smMIP_DNAH1_142	3:52413994-52414145/16,24/-	0.795601	3	52414130	52414145	CTCACTGGTGATGAGC	5	52413994	52414017	GCTGGTCGAACCAGCTGCGGTCCT	1	52414018	52414129	TCGTAGGACTTGACATCGGAGCCTGGTGACATGAAGTCCCCGTAAAGAATGGGCTGGAAGGGGCAGACCTTGTTGAAGGTCACCTCCCACTGCTCCATGCAGCGCTTGAGGA	GCTGGTCGAACCAGCTGCGGTCCTCTTCAGCTTCCCGATATCCGACGGTAGTGTNNNNNCTCACTGGTGATGAGC	52413899	52414171	-	0	1
INF1_smMIP_DNAH1_143	3:52414040-52414191/16,24/-	0.822034	3	52414176	52414191	GGACCCCACCAGGGGC	2	52414040	52414063	ACCTTGTTGAAGGTCACCTCCCAC	1	52414064	52414175	AGGGCGCCTGCCTGGGCCCCTCACCTTACTCTCACTGGTGATGAGCTCGTAGGACTTGACATCGGAGCCTGGTGACATGAAGTCCCCGTAAAGAATGGGCTGGAAGGGGCAG	ACCTTGTTGAAGGTCACCTCCCACCTTCAGCTTCCCGATATCCGACGGTAGTGTNNNNNGGACCCCACCAGGGGC	52413899	52414171	-	0	20
INF1_smMIP_DNAH1_144	3:52415588-52415739/21,19/-	0.908149	3	52415719	52415739	GGCGTCCATGAAGAGGACCAG	1	52415588	52415606	GTCTCCCCGATTCCCCCCA	1	52415607	52415718	CTTCAGCTTGGCCGTGTTGATCTGGTTGTAGTCCTCTATGTACTCCTCTATCACCTGCATCATCTGTGCACCAAGGCGAGGATGGGGAAGGCGGGGTCTCTCTTACTGTAGG	GTCTCCCCGATTCCCCCCACTTCAGCTTCCCGATATCCGACGGTAGTGTNNNNNGGCGTCCATGAAGAGGACCAG	52415634	52415872	-	0	20
INF1_smMIP_DNAH1_145	3:52415682-52415833/16,24/-	0.653549	3	52415818	52415833	TGAGGGAGCTGCGGCC	1	52415682	52415705	GTGTTGATCTGGTTGTAGTCCTCT	1	52415706	52415817	GCTGCCACCCACGCCCAGCAGGAGTGCATTGCCCAGCGCCTGGCGTAGGGTGCGGCTGATGCGACAGATGTGGCTCATGGCGTCCATGAAGAGGACCAGCTTCAGCTTGGCC	GTGTTGATCTGGTTGTAGTCCTCTCTTCAGCTTCCCGATATCCGACGGTAGTGTNNNNNTGAGGGAGCTGCGGCC	52415634	52415872	-	0	1
INF1_smMIP_DNAH1_146	3:52415790-52415941/16,24/-	0.877153	3	52415926	52415941	GCCTCTACCACTGTGC	3	52415790	52415813	CCACCCACGCCCAGCAGGAGTGCA	1	52415814	52415925	AAAAGCATGGGTCAGTCAAACCGACCAGCCAGCCCTGGCCGCCCACTGCCCAGCACGCCCTGGAGGCGCTCACATGTGCGAGGCGAGCCTTGTGAGGGAGCTGCGGCCGCTG	CCACCCACGCCCAGCAGGAGTGCACTTCAGCTTCCCGATATCCGACGGTAGTGTNNNNNGCCTCTACCACTGTGC	52415634	52415872	-	0	1
INF1_smMIP_DNAH1_147	3:52416298-52416449/16,24/+	0.894776	3	52416298	52416313	AGTCCCTGGCATGCTT	3	52416426	52416449	GGGCCTACAGAACCTACCCATCAC	1	52416314	52416425	CAACCCAAACTTCTGCCTCCAGGGCCGAGTACGAGTGCTTCCAGATTGAACTATCCAAGAACTACGGCATGTCCGAGTGGCGAGATGATGTGAAGAAGGTCCTGCTCAAGGC	GGGCCTACAGAACCTACCCATCACCTTCAGCTTCCCGATATCCGACGGTAGTGTNNNNNAGTCCCTGGCATGCTT	52416314	52416491	+	0	1
INF1_smMIP_DNAH1_148	3:52416393-52416544/16,24/-	0.847931	3	52416529	52416544	TTCCGGGATGCTATGC	1	52416393	52416416	AGGACCTTCTTCACATCATCTCGC	1	52416417	52416528	TCAGATGGGGTTGTGTCCAGCCCCCCCGAGCCCTGCCCTCTGCTGTGGCAGTGGCACCTGGGTGTCTGAGAAGAGGAAGGTGATGGGTAGGTTCTGTAGGCCCGCCTTGAGC	AGGACCTTCTTCACATCATCTCGCCTTCAGCTTCCCGATATCCGACGGTAGTGTNNNNNTTCCGGGATGCTATGC	52416314	52416491	-	0	20
INF1_smMIP_DNAH1_149	3:52417281-52417432/17,23/+	0.898795	3	52417281	52417297	GCTTCTCTGAGCCTTAG	14	52417410	52417432	CGAATCCTTCCTGGAAGATATCA	1	52417298	52417409	TGGTACAGTCTGTCAAATGGAGCTGTTGTGAAGGTCCAGCGAGACTGTGGTCATATAGTCCAACATGCAGGGGCTTAGCTCCCCACTCCTTCACCCCTCCCCAGATCAAGAA	CGAATCCTTCCTGGAAGATATCACTTCAGCTTCCCGATATCCGACGGTAGTGTNNNNNGCTTCTCTGAGCCTTAG	52417380	52417630	+	0	1
INF1_smMIP_DNAH1_150	3:52417369-52417520/19,21/-	0.889603	3	52417502	52417520	TGGATATAGGGCCGCATGG	1	52417369	52417389	GAAGGAGTGGGGAGCTAAGCC	1	52417390	52417501	TGCTGACGATCTGGTCCTGCTCGTCCGCAGTATACAGATTGGGAATGTCACCAGAGTTTAGGACGTTGTTGATATCTTCCAGGAAGGATTCGTTCTTGATCTGGGGAGGGGT	GAAGGAGTGGGGAGCTAAGCCCTTCAGCTTCCCGATATCCGACGGTAGTGTNNNNNTGGATATAGGGCCGCATGG	52417380	52417630	-	0	1
INF1_smMIP_DNAH1_150b	3:52417369-52417520/19,21/-	0.889603	3	52417502	52417520	TGGATATAGGGCTGCATGG	1	52417369	52417389	GAAGGAGTGGGGAGCTAAGCC	1	52417390	52417501	TGCTGACGATCTGGTCCTGCTCGTCCGCAGTATACAGATTGGGAATGTCACCAGAGTTTAGGACGTTGTTGATATCTTCCAGGAAGGATTCGTTCTTGATCTGGGGAGGGGT	GAAGGAGTGGGGAGCTAAGCCCTTCAGCTTCCCGATATCCGACGGTAGTGTNNNNNTGGATATAGGGCTGCATGG	52417380	52417630	-	0	1
INF1_smMIP_DNAH1_151	3:52417405-52417556/22,18/-	0.894642	3	52417535	52417556	ATGAGGTTGGCCTTGGTGGGCT	1	52417405	52417422	CAGGAAGGATTCGTTCTT	1	52417423	52417534	GTAGGCCCTGCTCCTGGATATAGGGCCGCATGGTGCTGACGATCTGGTCCTGCTCGTCCGCAGTATACAGATTGGGAATGTCACCAGAGTTTAGGACGTTGTTGATATCTTC	CAGGAAGGATTCGTTCTTCTTCAGCTTCCCGATATCCGACGGTAGTGTNNNNNATGAGGTTGGCCTTGGTGGGCT	52417380	52417630	-	0	1
INF1_smMIP_DNAH1_152	3:52417514-52417665/16,24/+	0.84123	3	52417514	52417529	ATATCCAGGAGCAGGG	1	52417642	52417665	GCAGCGGAGCTGGGTGTGTACATG	1	52417530	52417641	CCTACAGCCCACCAAGGCCAACCTCATGGCTGCTTACACAGGGCGTGTGCGCAGCAACATCCACATGGTGCTGTGCATGAGGTACAGGCAGCTGTCGCCAGGCTGCGCTGGG	GCAGCGGAGCTGGGTGTGTACATGCTTCAGCTTCCCGATATCCGACGGTAGTGTNNNNNATATCCAGGAGCAGGG	52417380	52417630	+	0	1
INF1_smMIP_DNAH1_153	3:52417834-52417985/18,22/+	0.902479	3	52417834	52417851	GGTCAGTGTCTCTGGACC	2	52417964	52417985	GCAGAAGCCCTGAAGTCTGTGG	1	52417852	52417963	TCATTTGGATTCCTGACTTTCCAGCCCCATCGGAGAGGTCTTCCGAGCTCGTCTGAGGCAGTTTCCCTCCCTGGTCAACTGCTGTACCATCGACTGGTTTAACGAGTGGCCG	GCAGAAGCCCTGAAGTCTGTGGCTTCAGCTTCCCGATATCCGACGGTAGTGTNNNNNGGTCAGTGTCTCTGGACC	52417854	52418067	+	0	1
INF1_smMIP_DNAH1_154	3:52417946-52418097/18,22/+	0.900488	3	52417946	52417963	TGGTTTAACGAGTGGCCG	1	52418076	52418097	TGGGGAGACCTGTTTAGCTTGG	1	52417964	52418075	GCAGAAGCCCTGAAGTCTGTGGCCACCGTGTTCCTCAATGAGATCCCAGAACTGGAATCCTCCCAGGAAGAAATCCAAGGACTGGTGGGTGTCTTGCTGAAGCTCAGGCCCT	TGGGGAGACCTGTTTAGCTTGGCTTCAGCTTCCCGATATCCGACGGTAGTGTNNNNNTGGTTTAACGAGTGGCCG	52417854	52418067	+	0	1
INF1_smMIP_DNAH1_155	3:52418713-52418864/16,24/-	0.84926	3	52418849	52418864	CTCTGCCAGGTACTCG	1	52418713	52418736	CACAGCCACTGCAACCTGGGCCGA	1	52418737	52418848	ATGCACTTCTTGGACACCGACTGGTGGATGTACACACAGACCTGGATCTGGGGGAGGAAGACCATGGATGCCGGCCTGGTAGAGGCCCCAGGAAAGACAGGGACTGGGTGCC	CACAGCCACTGCAACCTGGGCCGACTTCAGCTTCCCGATATCCGACGGTAGTGTNNNNNCTCTGCCAGGTACTCG	52418780	52419013	-	0	1
INF1_smMIP_DNAH1_156	3:52418827-52418978/18,22/-	0.896482	3	52418961	52418978	CTTCATGCGGTTCTTGGC	1	52418827	52418848	ATGCACTTCTTGGACACCGACT	1	52418849	52418960	AGTTTTCAGCTCCAGTTTCTTCTGCCCGATGAGGATGGAGAAAATATGAAGCAGCTCCAAGTAGCTCTTGGGGGTCACATAGTTGTGGCGGGTCAGCTCTGCCAGGTACTCG	ATGCACTTCTTGGACACCGACTCTTCAGCTTCCCGATATCCGACGGTAGTGTNNNNNCTTCATGCGGTTCTTGGC	52418780	52419013	-	0	1
INF1_smMIP_DNAH1_157	3:52418907-52419058/16,24/-	0.90749	3	52419043	52419058	AGGGCTGAGTGAGCAG	8	52418907	52418930	GAGGATGGAGAAAATATGAAGCAG	1	52418931	52419042	GCAGCCTGCAGGCAGCTGACCTTGTCCACGGGGACTCGCCTGGGCCCACCTTGTCGAGGCCGCTCTTCATGCGGTTCTTGGCAGTTTTCAGCTCCAGTTTCTTCTGCCCGAT	GAGGATGGAGAAAATATGAAGCAGCTTCAGCTTCCCGATATCCGACGGTAGTGTNNNNNAGGGCTGAGTGAGCAG	52418780	52419013	-	0	1
INF1_smMIP_DNAH1_158	3:52419300-52419451/16,24/+	0.929643	3	52419300	52419315	TGCTCTCTCTGTCCCT	13	52419428	52419451	GCCAAGGACACCATGCTCACCATG	1	52419316	52419427	GCCACACCTGTTTTCCTGTCTCTGCCCTGACCCCTAGCTGCTGCGCACTTCTGAGGATGTAGCCAAGATGCAGGAGGACCTGGAGAGTATGCACCCCCTGCTGGAGGAGGCT	GCCAAGGACACCATGCTCACCATGCTTCAGCTTCCCGATATCCGACGGTAGTGTNNNNNTGCTCTCTCTGTCCCT	52419331	52419483	+	0	1
INF1_smMIP_DNAH1_159	3:52419357-52419508/16,24/-	0.813024	3	52419493	52419508	TTCCTCAGAGTCAGGC	3	52419357	52419380	TGGCTACATCCTCAGAAGTGCGCA	1	52419381	52419492	ATTGGGGAGGGGCTCGGGAGCACCCCAACCTTGATCTGCTCCATGGTGAGCATGGTGTCCTTGGCAGCCTCCTCCAGCAGGGGGTGCATACTCTCCAGGTCCTCCTGCATCT	TGGCTACATCCTCAGAAGTGCGCACTTCAGCTTCCCGATATCCGACGGTAGTGTNNNNNTTCCTCAGAGTCAGGC	52419331	52419483	-	0	1
INF1_smMIP_DNAH1_160	3:52420112-52420263/20,20/+	0.904943	3	52420112	52420131	TGGGGAGACTAAGATGCAGA	1	52420244	52420263	GGCCAAGAAGGCACAAGCTA	1	52420132	52420243	GAAGAGAAAAGGGGGGAGGACATCCCTATGTCTCCCATCCCCAGGTGGATACGGCCATCGCCGAGGAGACCCGGAATTCAGTGCAGACAGAGGAGATCAAAGCCAATGAGAA	GGCCAAGAAGGCACAAGCTACTTCAGCTTCCCGATATCCGACGGTAGTGTNNNNNTGGGGAGACTAAGATGCAGA	52420154	52420381	+	0	1
INF1_smMIP_DNAH1_161	3:52420215-52420366/17,23/-	0.903812	3	52420350	52420366	CCCACCTCGGTCACATC	2	52420215	52420237	TTGGCTTTGATCTCCTCTGTCTG	1	52420238	52420349	GTTCTTGTTGAGGTTGCGCAGGCTGGCCAGAGCCGCATCCAGGGCTGGCAACGCCTCGTCCAGGTCCTTCTGGGCATCGTCAGCAATAGCTTGTGCCTTCTTGGCCTTCTCA	TTGGCTTTGATCTCCTCTGTCTGCTTCAGCTTCCCGATATCCGACGGTAGTGTNNNNNCCCACCTCGGTCACATC	52420154	52420381	-	0	1
INF1_smMIP_DNAH1_162	3:52420255-52420406/17,23/-	0.624379	3	52420390	52420406	CAGAGGCATATGAGAGG	3	52420255	52420277	GGCATCGTCAGCAATAGCTTGTG	1	52420278	52420389	GAATGCCAGGAGATGCCCTGCTGCCCACCTCGGTCACATCGTTCTTGTTGAGGTTGCGCAGGCTGGCCAGAGCCGCATCCAGGGCTGGCAACGCCTCGTCCAGGTCCTTCTG	GGCATCGTCAGCAATAGCTTGTGCTTCAGCTTCCCGATATCCGACGGTAGTGTNNNNNCAGAGGCATATGAGAGG	52420154	52420381	-	0	1
INF1_smMIP_DNAH1_163	3:52420628-52420779/16,24/-	0.892426	3	52420764	52420779	TGGCTTTTCTCCAGGC	7	52420628	52420651	AGACTCAGACCCAGTGGGCACCCC	1	52420652	52420763	ACCTTCTTGGGCTTGATGCCTTTCATAATGCACACAGCTTCTATGACCAGTTTCACACCCGGGGGTGGCCGCTGCATGGCACGTACCTGCAGGCCCAGCCACCAAGTGGGGA	AGACTCAGACCCAGTGGGCACCCCCTTCAGCTTCCCGATATCCGACGGTAGTGTNNNNNTGGCTTTTCTCCAGGC	52420656	52420889	-	0	1
INF1_smMIP_DNAH1_164	3:52420734-52420885/17,23/-	0.855837	3	52420869	52420885	TGCCTGGCATGCTTACC	2	52420734	52420756	TGGGCTTGATGCCTTTCATAATG	1	52420757	52420868	TTGTCAAACTTGAAGAGGCTCTCAAGGAAGTGGCCCGGGTCCTGCAGCAGCCCCTTGCCAGGCTCCCAGTAGTCATCCACCTTGGTGCCTGGCTTTTCTCCAGGCACCTTCT	TGGGCTTGATGCCTTTCATAATGCTTCAGCTTCCCGATATCCGACGGTAGTGTNNNNNTGCCTGGCATGCTTACC	52420656	52420889	-	0	1
INF1_smMIP_DNAH1_165	3:52420840-52420991/16,24/+	0.849226	3	52420840	52420855	TTCCTTGAGAGCCTCT	4	52420968	52420991	GCATGTGCAGTGGCCTCTGTCCTG	1	52420856	52420967	TCAAGTTTGACAAGGTAAGCATGCCAGGCACCCTGGCCAGCCAGCGAGTGAGGACAAGGCCCGCCCGGCAGGACAGTGAAGCTGGAGAGGAGCTTGCCCCACCACATCATCT	GCATGTGCAGTGGCCTCTGTCCTGCTTCAGCTTCCCGATATCCGACGGTAGTGTNNNNNTTCCTTGAGAGCCTCT	52420656	52420889	+	0	1
INF1_smMIP_DNAH1_166	3:52422123-52422274/17,23/-	0.881775	3	52422258	52422274	GCCTTGGACACCTTGGC	1	52422123	52422145	CAAGGGTGACAGGGGAAGGGCTC	1	52422146	52422257	AATGGTGGCTGGCTGGAACTCTTCATTATCGATGTACGGCTGGATGGCTTTGATCACCACATCCCCAATGTTGTCCTGAGGTGGGAAGCCTGGGTCTCAAGAGGCTGCTTCT	CAAGGGTGACAGGGGAAGGGCTCCTTCAGCTTCCCGATATCCGACGGTAGTGTNNNNNGCCTTGGACACCTTGGC	52422161	52422645	-	0	1
INF1_smMIP_DNAH1_167	3:52422234-52422385/21,19/-	0.783033	3	52422365	52422385	GGAGCCCTCCCCCACCAGCTC	1	52422234	52422252	TGGCTGGCTGGAACTCTTC	1	52422253	52422364	CACTCAGCCCTCACCCGCTTGGGCTCCACGGCCTTGGCCACAAAGTGGTACTTGTGCATGGCGCGCACCCACTGGCAGATGGAGGTGCAAGCCTTGGACACCTTGGCAATGG	TGGCTGGCTGGAACTCTTCCTTCAGCTTCCCGATATCCGACGGTAGTGTNNNNNGGAGCCCTCCCCCACCAGCTC	52422161	52422645	-	0	1
INF1_smMIP_DNAH1_168	3:52422341-52422492/16,24/-	0.760027	3	52422477	52422492	GCCTCATCCAGGATCC	4	52422341	52422364	CACTCAGCCCTCACCCGCTTGGGC	1	52422365	52422476	TCTGTGTCACCCCCAGGTCATCCTGGGCCTCCAGCAGGGCTTGCTGTGGGGCGGAGGGCGCAGGATTAGCTCGCCAAGTACCCCCGGGAGGGGAGCCCTCCCCCACCAGCTC	CACTCAGCCCTCACCCGCTTGGGCCTTCAGCTTCCCGATATCCGACGGTAGTGTNNNNNGCCTCATCCAGGATCC	52422161	52422645	-	0	1
INF1_smMIP_DNAH1_169	3:52422457-52422608/21,19/-	0.911028	3	52422588	52422608	GCCGCTGCTCACACTGCTCAC	1	52422457	52422475	CTGTGTCACCCCCAGGTCA	1	52422476	52422587	ACTTCAGCTCCAGCTCCTCCTTCTTGGTAATGCATTCCCGGTACTTAGCCTGCATTGTGGCGATGCCGTCCTCCACCTCACGAAGGCGCTGTTTTGCCTCATCCAGGATCCT	CTGTGTCACCCCCAGGTCACTTCAGCTTCCCGATATCCGACGGTAGTGTNNNNNGCCGCTGCTCACACTGCTCAC	52422161	52422645	-	0	1
INF1_smMIP_DNAH1_170	3:52422559-52422710/18,22/-	0.764987	3	52422693	52422710	CCCAGGACCCACCGGCGC	1	52422559	52422580	CTCCAGCTCCTCCTTCTTGGTA	1	52422581	52422692	CCTGGTCCTTTCTGGCCCCTGTCTGGGCCGGGCCCGCTTGCAGGCCTTGCAGGAGGAGGGTGCGCACCTTGCCAGCTCGGCCCAGCCGCTGCTCACACTGCTCACACTTCAG	CTCCAGCTCCTCCTTCTTGGTACTTCAGCTTCCCGATATCCGACGGTAGTGTNNNNNCCCAGGACCCACCGGCGC	52422161	52422645	-	0	1
INF1_smMIP_DNAH1_171	3:52422774-52422925/18,22/-	0.661936	3	52422908	52422925	CCAGCGGCCACCAGGACA	1	52422774	52422795	CTCTGGGAGGCTGGGCTAGGGG	1	52422796	52422907	TCGCCGGAGATGTTGTTGAGCATGTACTGCAGGTTCTCCACCGTCTCCTGCCAGCGCACCTTCTCATCCGACAGCCCGTTGATGAGCTGGAGGGGCAGCCCCGTGGGGTGGG	CTCTGGGAGGCTGGGCTAGGGGCTTCAGCTTCCCGATATCCGACGGTAGTGTNNNNNCCAGCGGCCACCAGGACA	52422800	52422973	-	0	10
INF1_smMIP_DNAH1_172	3:52422849-52423000/18,22/-	0.689388	3	52422983	52423000	CTTTGGGAAGGCGAGGCT	1	52422849	52422870	CCACCGTCTCCTGCCAGCGCAC	1	52422871	52422982	GGTCAGAGACAGAGGTGGGGACTTCTTACCGTGAAGGGGCCCAGGTAGGCCACAAAGCCAGCGGCCACCAGGACATCGCCGGAGATGTTGTTGAGCATGTACTGCAGGTTCT	CCACCGTCTCCTGCCAGCGCACCTTCAGCTTCCCGATATCCGACGGTAGTGTNNNNNCTTTGGGAAGGCGAGGCT	52422800	52422973	-	0	1
INF1_smMIP_DNAH1_173	3:52423431-52423582/17,23/-	0.862646	3	52423566	52423582	CAGGGTTCCCCAGCGTC	1	52423431	52423453	CCACCCCACCATGACACTCACAG	1	52423454	52423565	CCGATTAGCGTGGGCTCGGAGGTGTGTGGGACATTGTGGCTCCTGAGCTGCTTGACCCAGCTGTCGTAGAGCACCGTGCGGTACTGGCCCTGGGGAGATGCCAGACTCAGGA	CCACCCCACCATGACACTCACAGCTTCAGCTTCCCGATATCCGACGGTAGTGTNNNNNCAGGGTTCCCCAGCGTC	52423455	52423622	-	0	1
INF1_smMIP_DNAH1_174	3:52423499-52423650/20,20/-	0.703231	3	52423631	52423650	ACCACACCACAGGCCCTGCC	1	52423499	52423518	CTGCTTGACCCAGCTGTCGT	1	52423519	52423630	TGGGCACTCCTGCCCCTGGGGTGGGCACCTGCCACGATCGGATCTTCACAGGGTTCCCCAGCGTCCCGATTAGCGTGGGCTCGGAGGTGTGTGGGACATTGTGGCTCCTGAG	CTGCTTGACCCAGCTGTCGTCTTCAGCTTCCCGATATCCGACGGTAGTGTNNNNNACCACACCACAGGCCCTGCC	52423455	52423622	-	0	1
INF1_smMIP_DNAH1_175	3:52424836-52424987/16,24/+	0.765725	3	52424836	52424851	TGCAGTAAGGAGAGGG	7	52424964	52424987	CCAACGACACACTGTCAGTGGAGA	1	52424852	52424963	AAGTCCATAGCCGAAACACGAGGCCGGGAGATGCTGATGCCCTCAGTGACCCTGCTTGCAGGAAAGCTCTGACCCAGTCCAGTGCCTGGCTCTCCACAGATCGCTGGCCTCC	CCAACGACACACTGTCAGTGGAGACTTCAGCTTCCCGATATCCGACGGTAGTGTNNNNNTGCAGTAAGGAGAGGG	52424929	52425090	+	0	1
INF1_smMIP_DNAH1_176	3:52424925-52425076/16,24/-	0.791025	3	52425061	52425076	GCTCACCATGTTCTTG	3	52424925	52424948	GTGGAGAGCCAGGCACTGGACTGG	1	52424949	52425060	ATCCATTTGTTGGCCTGGCTCTGAGGGTCAATGAAGTGGGTCCAGCGCTGGGAAAACTGGTTGATGACCCCGTTCTCCACTGACAGTGTGTCGTTGGGGAGGCCAGCGATCT	GTGGAGAGCCAGGCACTGGACTGGCTTCAGCTTCCCGATATCCGACGGTAGTGTNNNNNGCTCACCATGTTCTTG	52424929	52425090	-	0	5
INF1_smMIP_DNAH1_177	3:52424961-52425112/21,19/-	0.891423	3	52425092	52425112	CCTGGCTGGGGTGGGGTGGTG	1	52424961	52424979	GACAGTGTGTCGTTGGGGA	1	52424980	52425091	GTGCCTGGTGGGTGGGCTCACCATGTTCTTGATCCATTTGTTGGCCTGGCTCTGAGGGTCAATGAAGTGGGTCCAGCGCTGGGAAAACTGGTTGATGACCCCGTTCTCCACT	GACAGTGTGTCGTTGGGGACTTCAGCTTCCCGATATCCGACGGTAGTGTNNNNNCCTGGCTGGGGTGGGGTGGTG	52424929	52425090	-	0	20
INF1_smMIP_DNAH1_178	3:52425145-52425296/19,21/-	0.928719	3	52425278	52425296	GTTCTCCAGGAGACATGGC	1	52425145	52425165	CAGGGACTGAGAGCCAGCCTG	1	52425166	52425277	TTGCCAAAGCGGATGGCGTTCTCCATGCTGCGCAGGAAGTCGCGGTCACTCAACTTGAACACATCCAGCCCATTGTCCTTCTCCTGTAAGGGAAGGGGAAAAGAAGGGGTTG	CAGGGACTGAGAGCCAGCCTGCTTCAGCTTCCCGATATCCGACGGTAGTGTNNNNNGTTCTCCAGGAGACATGGC	52425173	52425639	-	0	1
INF1_smMIP_DNAH1_179	3:52425244-52425395/16,24/+	0.754893	3	52425244	52425259	TGCGCAGCATGGAGAA	1	52425372	52425395	GGCAGTAGGCCTGGACAGGGCAGT	1	52425260	52425371	CGCCATCCGCTTTGGCAAGCCATGTCTCCTGGAGAACGTGGGCGAGGAGCTAGACCCAGCCCTGGAGCCAGTGCTGCTCAAGCAGGTGGGTCTGCAGTGGTGATGGCAGGGT	GGCAGTAGGCCTGGACAGGGCAGTCTTCAGCTTCCCGATATCCGACGGTAGTGTNNNNNTGCGCAGCATGGAGAA	52425173	52425639	+	0	5
INF1_smMIP_DNAH1_180	3:52425345-52425496/17,23/+	0.768865	3	52425345	52425361	GTGGGTCTGCAGTGGTG	5	52425474	52425496	GGAAACACGGTGCTGAAGCTGGG	1	52425362	52425473	ATGGCAGGGTGGCAGTAGGCCTGGACAGGGCAGTCCCCTTCCCCTGCCCCACTGGTGATGCTCAGGCCACAGTACCCACCGGTCCCACCCACCACAGACGTACAAGCAGCAG	GGAAACACGGTGCTGAAGCTGGGCTTCAGCTTCCCGATATCCGACGGTAGTGTNNNNNGTGGGTCTGCAGTGGTG	52425173	52425639	+	0	20
INF1_smMIP_DNAH1_181	3:52425445-52425596/22,18/+	0.873811	3	52425445	52425466	CCCACCCACCACAGACGTACAA	1	52425579	52425596	TCCACCAAACTCACCCTC	2	52425467	52425578	GCAGCAGGGAAACACGGTGCTGAAGCTGGGGGACACGGTGATCCCCTACCATGAGGACTTCAGGATGTACATCACCACCAAGCTGCCCAACCCACACTACACGCCCGAGATC	TCCACCAAACTCACCCTCCTTCAGCTTCCCGATATCCGACGGTAGTGTNNNNNCCCACCCACCACAGACGTACAA	52425173	52425639	+	0	20
INF1_smMIP_DNAH1_182	3:52425475-52425626/21,19/-	0.590204	3	52425606	52425626	GGCTCACCTGGGCGACAGGGT	1	52425475	52425493	AGCTTCAGCACCGTGTTTC	1	52425494	52425605	GAAGTTGATGAGGGTGAGTTTGGTGGAGATCTCGGGCGTGTAGTGTGGGTTGGGCAGCTTGGTGGTGATGTACATCCTGAAGTCCTCATGGTAGGGGATCACCGTGTCCCCC	AGCTTCAGCACCGTGTTTCCTTCAGCTTCCCGATATCCGACGGTAGTGTNNNNNGGCTCACCTGGGCGACAGGGT	52425173	52425639	-	0	20
INF1_smMIP_DNAH1_183	3:52425582-52425733/16,24/-	0.504886	3	52425718	52425733	GAGACTTTGAGTGGGG	6	52425582	52425605	GAAGTTGATGAGGGTGAGTTTGGT	1	52425606	52425717	GAAAGTCCCACTGACTCCCGGCCTGGGGGTGGGAGAGGAGCAGCTGGGCAGGCAGAGGCAGAGCTGATGCTTGGGCGTCCCCAAGAGTGGGGGCTCACCTGGGCGACAGGGT	GAAGTTGATGAGGGTGAGTTTGGTCTTCAGCTTCCCGATATCCGACGGTAGTGTNNNNNGAGACTTTGAGTGGGG	52425173	52425639	-	0	1
INF1_smMIP_DNAH1_184	3:52426432-52426583/16,24/-	0.809475	3	52426568	52426583	CCTGGCGCATCTTGGC	1	52426432	52426455	TCTGTAATACCTGGTGGGCCCCGG	1	52426456	52426567	ATTACTGATAATCAGCTGGTTCTTGGCCTCCTCCAGGTCGGGTCGCTCCTCTGCCACTACCTGGCCCAGTAGCTGGTCCTCTAGGCCACTGCCGGGGGCAGGGGACACCAAG	TCTGTAATACCTGGTGGGCCCCGGCTTCAGCTTCCCGATATCCGACGGTAGTGTNNNNNCCTGGCGCATCTTGGC	52426458	52426725	-	0	1
INF1_smMIP_DNAH1_185	3:52426535-52426686/18,22/-	0.900415	3	52426669	52426686	ATCTTGGAGGCTTCCAGC	1	52426535	52426556	TCAGCTGGTTCTTGGCCTCCTC	1	52426557	52426668	ACCTTGATGAGTTCCATGTCATCTACAGGGTTGCCCTCGGAGGAGCTGAGCCGGTACAGGATCTGGTCCTCAATGTCCTTCAGCTCCTGGCGCATCTTGGCATTACTGATAA	TCAGCTGGTTCTTGGCCTCCTCCTTCAGCTTCCCGATATCCGACGGTAGTGTNNNNNATCTTGGAGGCTTCCAGC	52426458	52426725	-	0	10
INF1_smMIP_DNAH1_186	3:52426623-52426774/22,18/-	0.582366	3	52426753	52426774	AGGCAGGGAGAGGTGGGGGGCA	1	52426623	52426640	GGTTGCCCTCGGAGGAGC	1	52426641	52426752	GGCCCGGGGCACTCCCGGGGCAGGTGGGTGGGCAGGCAGCAGCTGACCTGGATCTCAGCAGCCTTCATCTTGGAGGCTTCCAGCACCTTGATGAGTTCCATGTCATCTACAG	GGTTGCCCTCGGAGGAGCCTTCAGCTTCCCGATATCCGACGGTAGTGTNNNNNAGGCAGGGAGAGGTGGGGGGCA	52426458	52426725	-	0	20
INF1_smMIP_DNAH1_187	3:52426785-52426936/16,24/-	0.795341	3	52426921	52426936	AGAGGATCTGGGTGCG	3	52426785	52426808	AGAAGGTAGGGGGTTTGGGGGGCA	1	52426809	52426920	GATGGCCACGGGTATGTACTCCATGCGCGTCAGGTCGATGTCCTTCTCCGTCTGCTCTGCAATCCTGACTTTGGCCTGTGGGTGTAGTGGGTGGGGGGAGGGGTCAAAGAGC	AGAAGGTAGGGGGTTTGGGGGGCACTTCAGCTTCCCGATATCCGACGGTAGTGTNNNNNAGAGGATCTGGGTGCG	52426824	52427061	-	0	20
INF1_smMIP_DNAH1_188	3:52426821-52426972/16,24/-	0.867478	3	52426957	52426972	TGGGGTCCACGTTGGC	1	52426821	52426844	TGTGGGTGTAGTGGGTGGGGGGAG	1	52426845	52426956	CAGGTCGGACACACAGAAGAAGAGGATCTGGGTGCGGATGGCCACGGGTATGTACTCCATGCGCGTCAGGTCGATGTCCTTCTCCGTCTGCTCTGCAATCCTGACTTTGGCC	TGTGGGTGTAGTGGGTGGGGGGAGCTTCAGCTTCCCGATATCCGACGGTAGTGTNNNNNTGGGGTCCACGTTGGC	52426824	52427061	-	0	20
INF1_smMIP_DNAH1_189	3:52426931-52427082/17,23/+	0.899387	3	52426931	52426947	TCCTCTTCTTCTGTGTG	5	52427060	52427082	GCTCCTACCCTGCACAGATATGA	1	52426948	52427059	TCCGACCTGGCCAACGTGGACCCCATGTACCAGTACTCCCTTGAGTGGTTTCTCAACATCTTCCTCTCGGGCATCGCCAACTCAGAGAGAGCAGGTAGCACCGGCATGCCAG	GCTCCTACCCTGCACAGATATGACTTCAGCTTCCCGATATCCGACGGTAGTGTNNNNNTCCTCTTCTTCTGTGTG	52426824	52427061	+	0	1
INF1_smMIP_DNAH1_190	3:52426999-52427150/16,24/+	0.885201	3	52426999	52427014	CTCAACATCTTCCTCT	10	52427127	52427150	ACTGTGTTCACTGGCGTACACTCT	1	52427015	52427126	CGGGCATCGCCAACTCAGAGAGAGCAGGTAGCACCGGCATGCCAGGCTCCTACCCTGCACAGATATGACCCATGTGGACACATTTCCACTGTGGGGCACACACAAACTCACA	ACTGTGTTCACTGGCGTACACTCTCTTCAGCTTCCCGATATCCGACGGTAGTGTNNNNNCTCAACATCTTCCTCT	52426824	52427061	+	0	1
INF1_smMIP_DNAH1_191	3:52427298-52427449/16,24/-	0.754789	3	52427434	52427449	AACATCAGCTTGTGCT	2	52427298	52427321	GGAGAGGTGAGAGGAAGGAAGAGC	1	52427322	52427433	TCTCAAAGAGGCTGCGGCAGACGTTGCTGTAGAGGCTGTAGGTCAGGTAGCGGTTGATGTTGGAGATGCGCTTCTTCAGGTTGTCTGTGGAGTGGAGAAGTGATGGCAGCGC	GGAGAGGTGAGAGGAAGGAAGAGCCTTCAGCTTCCCGATATCCGACGGTAGTGTNNNNNAACATCAGCTTGTGCT	52427328	52427521	-	0	1
INF1_smMIP_DNAH1_192	3:52427360-52427511/17,23/-	0.890687	3	52427495	52427511	CTGCCAGCACCTGGTTG	1	52427360	52427382	GGTTGATGTTGGAGATGCGCTTC	1	52427383	52427494	ATTTTGCCCTCGTTCATCATGATGCGAACACACAGCAGGAAGGCAAACATCAGCTTGTGCTTCTCAAAGAGGCTGCGGCAGACGTTGCTGTAGAGGCTGTAGGTCAGGTAGC	GGTTGATGTTGGAGATGCGCTTCCTTCAGCTTCCCGATATCCGACGGTAGTGTNNNNNCTGCCAGCACCTGGTTG	52427328	52427521	-	0	1
INF1_smMIP_DNAH1_193	3:52427453-52427604/16,24/+	0.920993	3	52427453	52427468	CTTCCTGCTGTGTGTT	13	52427581	52427604	GAAAGCCAGGCATGAAGGCACCGC	1	52427469	52427580	CGCATCATGATGAACGAGGGCAAAATCAACCAGGTGCTGGCAGAGACACCCAGGACAGACTGCCTGAGGGGTGGCCCTGTGGCAGGGCCTGAGAACAGGGTGGAAGGAAAGG	GAAAGCCAGGCATGAAGGCACCGCCTTCAGCTTCCCGATATCCGACGGTAGTGTNNNNNCTTCCTGCTGTGTGTT	52427328	52427521	+	0	1
INF1_smMIP_DNAH1_194	3:52428373-52428524/16,24/-	0.73092	3	52428509	52428524	ATGATCGAGATGGAGC	1	52428373	52428396	AACCACCCTCACCTGGAGAAACTG	1	52428397	52428508	CCCCAGACAGGAGGTATCGCCACTCACTCTGGCAGGGGACAGGAGGAGGCTGATGCCCAGGCCCTGGCCAGCTCCTCCTGCTCTGGGCACCCCCACCCAGTAGTGCCTCTCT	AACCACCCTCACCTGGAGAAACTGCTTCAGCTTCCCGATATCCGACGGTAGTGTNNNNNATGATCGAGATGGAGC	52428459	52428697	-	0	20
INF1_smMIP_DNAH1_195	3:52428452-52428603/16,24/-	0.909713	3	52428588	52428603	AAAGGTTGGCAGGTTC	1	52428452	52428475	AGGGGACAGGAGGAGGCTGATGCC	1	52428476	52428587	GAGAGTGCTAGGATGTCTCGCCAAGCCCGGTCTGACAGCCAGTCCGGTGCCGGATTCTCAGTCATGATCGAGATGGAGCCCCCAGACAGGAGGTATCGCCACTCACTCTGGC	AGGGGACAGGAGGAGGCTGATGCCCTTCAGCTTCCCGATATCCGACGGTAGTGTNNNNNAAAGGTTGGCAGGTTC	52428459	52428697	-	0	1
INF1_smMIP_DNAH1_196	3:52428502-52428653/16,24/+	0.850691	3	52428502	52428517	TCTGGGGGCTCCATCT	5	52428630	52428653	GCACCTCTCAGAATTCCGGGTCAT	1	52428518	52428629	CGATCATGACTGAGAATCCGGCACCGGACTGGCTGTCAGACCGGGCTTGGCGAGACATCCTAGCACTCTCGAACCTGCCAACCTTTTCCTCCTTCTCTTCCGACTTCGTGAA	GCACCTCTCAGAATTCCGGGTCATCTTCAGCTTCCCGATATCCGACGGTAGTGTNNNNNTCTGGGGGCTCCATCT	52428459	52428697	+	0	1
INF1_smMIP_DNAH1_197	3:52428606-52428757/20,20/-	0.900113	3	52428738	52428757	AGAAGGCGCCCAGACAAGCC	1	52428606	52428625	CGAAGTCGGAAGAGAAGGAG	1	52428626	52428737	TTTCCTAGGGACTCATCCCCTCGATGGGCTCATCCTGCCATATTCTGGGGCCCAGCTAACCGGTGGGGCTCAAGGCTGTCGAAGATGACCCGGAATTCTGAGAGGTGCTTCA	CGAAGTCGGAAGAGAAGGAGCTTCAGCTTCCCGATATCCGACGGTAGTGTNNNNNAGAAGGCGCCCAGACAAGCC	52428459	52428697	-	0	20
INF1_smMIP_DNAH1_198	3:52428886-52429037/16,24/-	0.797583	3	52429022	52429037	CAAAGTCCTGCATGGC	4	52428886	52428909	CCCTGAGAGCCAGCCTGTTGGAAG	1	52428910	52429021	GTTGGTAACCTTGTCCCCACGCAGGCAGCGGAGGACTAGCAGCTTCTGGAACTGGTCTAGGTACTGGTCCCAGATGCCAGGCAAAGGCTCCCTGCAACAGTGGCCCACACCT	CCCTGAGAGCCAGCCTGTTGGAAGCTTCAGCTTCCCGATATCCGACGGTAGTGTNNNNNCAAAGTCCTGCATGGC	52428909	52429095	-	0	20
INF1_smMIP_DNAH1_199	3:52428964-52429115/19,21/-	0.725355	3	52429097	52429115	AAGCTCAAGGTGCCAGTCC	1	52428964	52428984	AGCAGCTTCTGGAACTGGTCT	1	52428985	52429096	TGCCAGGGTTCCAGCACTTGCCTGGGGTTCAATGAAGCGTGGCTCCAGGTTGGTGGCCACAAAGTCCTGCATGGCGTTGGTAACCTTGTCCCCACGCAGGCAGCGGAGGACT	AGCAGCTTCTGGAACTGGTCTCTTCAGCTTCCCGATATCCGACGGTAGTGTNNNNNAAGCTCAAGGTGCCAGTCC	52428909	52429095	-	0	1
INF1_smMIP_DNAH1_200	3:52429264-52429415/21,19/-	0.619384	3	52429395	52429415	AGGTCGGCAGCAGGGTCTGTG	1	52429264	52429282	AGAGAGATCGGGGCAAGGG	1	52429283	52429394	CCGGGTGACAGCACAAAGATGAGGGGTGTGGTGGAGTTGGAGTCTTTGAACACCACTGACAGATTGGCTGTCTGCAAGGGCAGGGGGAGATGCTGAGACCACCTGGGGCTGC	AGAGAGATCGGGGCAAGGGCTTCAGCTTCCCGATATCCGACGGTAGTGTNNNNNAGGTCGGCAGCAGGGTCTGTG	52429302	52429714	-	0	1
INF1_smMIP_DNAH1_201	3:52429372-52429523/17,23/-	0.793565	3	52429507	52429523	CACCCCCCAGCCCACTC	3	52429372	52429394	CCGGGTGACAGCACAAAGATGAG	1	52429395	52429506	CCTTCCTCCCTGCCTAGCCCTGACCTGCCCCTGGCCCAGGGAGATGGCAGAGAGCTTTTTGGAGAACTTCATTTCTTCGGCAAACTTGTAGAGGTCGGCAGCAGGGTCTGTG	CCGGGTGACAGCACAAAGATGAGCTTCAGCTTCCCGATATCCGACGGTAGTGTNNNNNCACCCCCCAGCCCACTC	52429302	52429714	-	0	10
INF1_smMIP_DNAH1_202	3:52429412-52429563/16,24/+	0.746616	3	52429412	52429427	ACCTCTACAAGTTTGC	5	52429540	52429563	GCTCAGTGCTCTTGCCCCTGCAGG	1	52429428	52429539	CGAAGAAATGAAGTTCTCCAAAAAGCTCTCTGCCATCTCCCTGGGCCAGGGGCAGGTCAGGGCTAGGCAGGGAGGAAGGGAGTGGGCTGGGGGGTGGGCAAGCTGGCCCCCT	GCTCAGTGCTCTTGCCCCTGCAGGCTTCAGCTTCCCGATATCCGACGGTAGTGTNNNNNACCTCTACAAGTTTGC	52429302	52429714	+	0	1
INF1_smMIP_DNAH1_203	3:52429505-52429656/18,22/+	0.874957	3	52429505	52429522	GGGAGTGGGCTGGGGGGT	2	52429635	52429656	CTGGCACCAAGCTGGATGCCAG	1	52429523	52429634	GGGCAAGCTGGCCCCCTGCTCAGTGCTCTTGCCCCTGCAGGGCCCTCGGGCAGAAGCCATGATGCGCAGCTCCATAGAGAGGGGCAAATGGGTCTTCTTCCAGAACTGCCAC	CTGGCACCAAGCTGGATGCCAGCTTCAGCTTCCCGATATCCGACGGTAGTGTNNNNNGGGAGTGGGCTGGGGGGT	52429302	52429714	+	0	20
INF1_smMIP_DNAH1_204	3:52429591-52429742/16,24/-	0.670584	3	52429727	52429742	GGATGCAGAGGCGGCC	4	52429591	52429614	CCCATTTGCCCCTCTCTATGGAGC	1	52429615	52429726	CCACTGGGTCTGTGATGGGCAGGGCAACACACCTTGTCGGGGTTGATGTGCTCGATGAGGCGTTCTAGGGCTGGCATCCAGCTTGGTGCCAGGTGGCAGTTCTGGAAGAAGA	CCCATTTGCCCCTCTCTATGGAGCCTTCAGCTTCCCGATATCCGACGGTAGTGTNNNNNGGATGCAGAGGCGGCC	52429302	52429714	-	0	1
INF1_smMIP_DNAH1_205	3:52430304-52430455/18,22/-	0.698495	3	52430438	52430455	GTTCTGCAGGATGGACAC	1	52430304	52430325	CAGGCTCCCTCCTGCCCAGGGA	1	52430326	52430437	TGGGAACTTGTTGCTGGGCAGGCTGGTGAGCCAGAGGCGGAAGTCCCTGTGTACCTGGTGGCCATGGCTCCACGTGAGCATTGAGACCCATATCTGGTGGCCACCCTGACAC	CAGGCTCCCTCCTGCCCAGGGACTTCAGCTTCCCGATATCCGACGGTAGTGTNNNNNGTTCTGCAGGATGGACAC	52430362	52431080	-	0	1
INF1_smMIP_DNAH1_206	3:52430403-52430554/21,19/-	0.821973	3	52430534	52430554	CTTGTGGCAGGAGTTGAGGAA	1	52430403	52430421	GGCAGGCTGGTGAGCCAGA	1	52430422	52430533	GTCTTCACCAAGGCTACTATAGGACTTCAGCAGGTTGGCCCTGACACCGCGTGGCGGCTCAATGGTCATCTTGGAGCCGTTCTGCAGGATGGACACTGGGAACTTGTTGCTG	GGCAGGCTGGTGAGCCAGACTTCAGCTTCCCGATATCCGACGGTAGTGTNNNNNCTTGTGGCAGGAGTTGAGGAA	52430362	52431080	-	0	1
INF1_smMIP_DNAH1_207	3:52430432-52430583/16,24/+	0.886694	3	52430432	52430447	TTCCCAGTGTCCATCC	8	52430560	52430583	GCACACTTGGTGCAGGCCTACCCT	1	52430448	52430559	TGCAGAACGGCTCCAAGATGACCATTGAGCCGCCACGCGGTGTCAGGGCCAACCTGCTGAAGTCCTATAGTAGCCTTGGTGAAGACTTCCTCAACTCCTGCCACAAGGTGAG	GCACACTTGGTGCAGGCCTACCCTCTTCAGCTTCCCGATATCCGACGGTAGTGTNNNNNTTCCCAGTGTCCATCC	52430362	52431080	+	0	1
INF1_smMIP_DNAH1_208	3:52430530-52430681/16,24/+	0.502819	3	52430530	52430545	AGACTTCCTCAACTCC	7	52430658	52430681	CTGTCTCTGTGCTTGTTCCATGGG	1	52430546	52430657	TGCCACAAGGTGAGGCACACTTGGTGCAGGCCTACCCTACCTGCCCCCGTCCCCGCTCCTCACCTCCCCTGCCTCCCACCTCCCCCAGGTGATGGAGTTCAAGTCTCTGCTG	CTGTCTCTGTGCTTGTTCCATGGGCTTCAGCTTCCCGATATCCGACGGTAGTGTNNNNNAGACTTCCTCAACTCC	52430362	52431080	+	0	20
INF1_smMIP_DNAH1_209	3:52430617-52430768/16,24/-	0.835066	3	52430753	52430768	GCTGATGCAGATGCGC	1	52430617	52430640	CCATCACCTGGGGGAGGTGGGAGG	1	52430641	52430752	AGATCTCCATCCGTGAACTCATAGGGGATGTTGAAGCCCAGGGGCCCAAACTTATGGCGCTCCAGGGCGTTCCCATGGAACAAGCACAGAGACAGCAGCAGAGACTTGAACT	CCATCACCTGGGGGAGGTGGGAGGCTTCAGCTTCCCGATATCCGACGGTAGTGTNNNNNGCTGATGCAGATGCGC	52430362	52431080	-	0	1
INF1_smMIP_DNAH1_210	3:52430725-52430876/22,18/+	0.799684	3	52430725	52430746	TCCCCTATGAGTTCACGGATGG	1	52430859	52430876	GAGCCCTCACCCACCCAC	1	52430747	52430858	AGATCTGCGCATCTGCATCAGCCAGCTCAAGATGTTCCTGGACGAATATGATGACATCCCCTACAAGGTGGGCCTGGGGCAGACTGGGGCCTGGGGGACTGGGCACTTAGGG	GAGCCCTCACCCACCCACCTTCAGCTTCCCGATATCCGACGGTAGTGTNNNNNTCCCCTATGAGTTCACGGATGG	52430362	52431080	+	0	20
INF1_smMIP_DNAH1_211	3:52430832-52430983/17,23/-	0.814895	3	52430967	52430983	GGTTGTAGAAGTCCTCC	2	52430832	52430854	AAGTGCCCAGTCCCCCAGGCCCC	1	52430855	52430966	AAGATGTTCATGATGCAGCGCCGGTCCCAGTCATCAGTGACACGGCCCCCGTAATTGATCTCCCCTGCCGTGTACTTGAGGACCTATGGGGTGGGTGGGTGAGGGCTCCCCT	AAGTGCCCAGTCCCCCAGGCCCCCTTCAGCTTCCCGATATCCGACGGTAGTGTNNNNNGGTTGTAGAAGTCCTCC	52430362	52431080	-	0	20
INF1_smMIP_DNAH1_212	3:52430880-52431031/16,24/-	0.757534	3	52431016	52431031	GGTAGATGCCCGAGGC	2	52430880	52430903	CCTGCCGTGTACTTGAGGACCTAT	1	52430904	52431015	GCTGTAGCTGTGCTCAGGGGAGAGCACGTCAGGGTTGTAGAAGTCCTCCAAGATGTTCATGATGCAGCGCCGGTCCCAGTCATCAGTGACACGGCCCCCGTAATTGATCTCC	CCTGCCGTGTACTTGAGGACCTATCTTCAGCTTCCCGATATCCGACGGTAGTGTNNNNNGGTAGATGCCCGAGGC	52430362	52431080	-	0	1
INF1_smMIP_DNAH1_213	3:52430992-52431143/16,24/-	0.691662	3	52431128	52431143	CCACCCAGCACCAAGG	7	52430992	52431015	GCTGTAGCTGTGCTCAGGGGAGAG	1	52431016	52431127	TGCTCATGGTACCCCAGAACCCCAGGCTGGCAGGCCCCTCCTGTGCAGCCCTTTGGGCTGGACTCACGTGGAGGTCGTAGGTAGGCGGGATCTGGTGGTAGATGCCCGAGGC	GCTGTAGCTGTGCTCAGGGGAGAGCTTCAGCTTCCCGATATCCGACGGTAGTGTNNNNNCCACCCAGCACCAAGG	52430362	52431080	-	0	10
INF1_smMIP_DNAH1_214	3:52431646-52431797/20,20/+	0.799372	3	52431646	52431665	GTGCTCCATTGGAGGGTAAC	1	52431778	52431797	GCCTGCATGACAATGCCAAC	1	52431666	52431777	TCTGAGGGCTGGGGCAGAGCAAGCCAGGGGCTTCCATGTTGGCCTCCTCTCTCCTAGGGCTACCTCTCCTACATCAAGAGCCTCCCACTCAATGATATGCCTGAGATCTTTG	GCCTGCATGACAATGCCAACCTTCAGCTTCCCGATATCCGACGGTAGTGTNNNNNGTGCTCCATTGGAGGGTAAC	52431701	52431913	+	0	1
INF1_smMIP_DNAH1_215	3:52431715-52431866/22,18/-	0.846256	3	52431845	52431866	AGATGATTTGGGTTGCAGCTGG	1	52431715	52431732	AGAGGTAGCCCTAGGAGA	1	52431733	52431844	ATGATGGTGCCCAGGAGGGCGAACGTCTCGTTCTGGGCAAAGGTGATGTTGGCATTGTCATGCAGGCCAAAGATCTCAGGCATATCATTGAGTGGGAGGCTCTTGATGTAGG	AGAGGTAGCCCTAGGAGACTTCAGCTTCCCGATATCCGACGGTAGTGTNNNNNAGATGATTTGGGTTGCAGCTGG	52431701	52431913	-	0	1
INF1_smMIP_DNAH1_216	3:52431781-52431932/17,23/-	0.78458	3	52431916	52431932	CCGTCCAGCCCTTGGGC	1	52431781	52431803	GGTGATGTTGGCATTGTCATGCA	1	52431804	52431915	CCCTTACTCTGACACCACCCACCTCCTCCCGGCCCTGGCTGCCTGCAGAAGATGATTTGGGTTGCAGCTGGATGATGGTGCCCAGGAGGGCGAACGTCTCGTTCTGGGCAAA	GGTGATGTTGGCATTGTCATGCACTTCAGCTTCCCGATATCCGACGGTAGTGTNNNNNCCGTCCAGCCCTTGGGC	52431701	52431913	-	0	1
INF1_smMIP_DNAH1_217	3:52431994-52432145/16,24/+	0.914396	3	52431994	52432009	ACAGGGGATAAGGGGG	1	52432122	52432145	GTACCCAGTGCTGTATGAGGAATC	1	52432010	52432121	CCCAGCCTTGACCCCACAGTATTCCTTTGCCCCTGCAGATAGTGGAGGACGTCACCCAAAACATTCTGCTCAAGGTGCCTGAGCCTATCAACTTGCAATGGGTGATGGCCAA	GTACCCAGTGCTGTATGAGGAATCCTTCAGCTTCCCGATATCCGACGGTAGTGTNNNNNACAGGGGATAAGGGGG	52432026	52432198	+	0	1
INF1_smMIP_DNAH1_218	3:52432106-52432257/16,24/+	0.900895	3	52432106	52432121	AATGGGTGATGGCCAA	1	52432234	52432257	ATGACAACAGGGGTTACTATGGGC	1	52432122	52432233	GTACCCAGTGCTGTATGAGGAATCAATGAACACAGTACTAGTACAAGAGGTCATTAGGTAATCACCCCGCCATACCCCTGCCCCGAGTCAGCGGCCACTGGACTGTAGAGAA	ATGACAACAGGGGTTACTATGGGCCTTCAGCTTCCCGATATCCGACGGTAGTGTNNNNNAATGGGTGATGGCCAA	52432026	52432198	+	0	1
INF1_smMIP_DNAH1_219	3:52432766-52432917/16,24/-	0.88089	3	52432902	52432917	CTTGAGTAGGTCTTGC	2	52432766	52432789	ACAGAGTGAAAAACAATGGCAAAA	1	52432790	52432901	AGTGTCTGTGTGATCACCTGCAGCAGCCGATTGTACCTGTGAGGCCAGTGGCAAGAGAATAGGTAGTGGGCTGGGGTCACGTGGCAGTAGCTATGCTCCGCAGCTCAAGGCC	ACAGAGTGAAAAACAATGGCAAAACTTCAGCTTCCCGATATCCGACGGTAGTGTNNNNNCTTGAGTAGGTCTTGC	52432844	52433237	-	0	1
INF1_smMIP_DNAH1_220	3:52432854-52433005/17,23/-	0.879949	3	52432989	52433005	CACTCCAGAGCTCAGGC	3	52432854	52432876	GCCGATTGTACCTGTGAGGCCAG	1	52432877	52432988	ACAGTATTGTTGTACAGGCTGGCAGCCATCAGCTCCAGCTGAGAGGACATCACTACCAGCCCCTTGAGTGCCTTGAGTAGGTCTTGCAGTGTCTGTGTGATCACCTGCAGCA	GCCGATTGTACCTGTGAGGCCAGCTTCAGCTTCCCGATATCCGACGGTAGTGTNNNNNCACTCCAGAGCTCAGGC	52432844	52433237	-	0	1
INF1_smMIP_DNAH1_221	3:52432940-52433091/16,24/-	0.883239	3	52433076	52433091	TTGGATCCAGGCCTGC	2	52432940	52432963	CCATCAGCTCCAGCTGAGAGGACA	1	52432964	52433075	AGAAAGTCCAGGCGTTGCAGCAGGTCCATGACCCATGATGACAGAGGCTTGAGCGATGGGTAGGCCTTGGCACTCCAGAGCTCAGGCACAGTATTGTTGTACAGGCTGGCAG	CCATCAGCTCCAGCTGAGAGGACACTTCAGCTTCCCGATATCCGACGGTAGTGTNNNNNTTGGATCCAGGCCTGC	52432844	52433237	-	0	1
INF1_smMIP_DNAH1_222	3:52433035-52433186/17,23/-	0.887231	3	52433170	52433186	ATGACAAATTTGCGGGC	1	52433035	52433057	AGCAGGTCCATGACCCATGATGA	1	52433058	52433169	AAAATTCTGCAGAGTGCCTGTTAAGAAAGCCTGGGGGAAGAAGAATCCACTGATCCAGAAGACAGCTGGGATGCCATCTTGGATCCAGGCCTGCAGAAAGTCCAGGCGTTGC	AGCAGGTCCATGACCCATGATGACTTCAGCTTCCCGATATCCGACGGTAGTGTNNNNNATGACAAATTTGCGGGC	52432844	52433237	-	0	1
INF1_smMIP_DNAH1_223	3:52433107-52433258/21,19/+	0.900023	3	52433107	52433127	GTCTTCTGGATCAGTGGATTC	1	52433240	52433258	GTCAGGTGACAGGCTAGGG	1	52433128	52433239	TTCTTCCCCCAGGCTTTCTTAACAGGCACTCTGCAGAATTTTGCCCGCAAATTTGTCATCTCCATTGACACCATCTCCTTTGATTTCAAGGTCTGGGCACAGCCAGGGCCAG	GTCAGGTGACAGGCTAGGGCTTCAGCTTCCCGATATCCGACGGTAGTGTNNNNNGTCTTCTGGATCAGTGGATTC	52432844	52433237	+	0	1
INF1_smMIP_DNAH1_224	3:52433524-52433675/16,24/+	0.971983	3	52433524	52433539	TGTTATGTGTGTGGGG	7	52433652	52433675	CAGAGGCCTTCCAGCTGGCTGAGT	1	52433540	52433651	TGTGTCTGTGTCTACCCACAGGTGATGTTTGAGGCACCATCAGAGTTAACACAAAGACCCCAAGTAGGGTGCTATATCCATGGATTATTCCTGGAAGGTGCCCGCTGGGATC	CAGAGGCCTTCCAGCTGGCTGAGTCTTCAGCTTCCCGATATCCGACGGTAGTGTNNNNNTGTTATGTGTGTGGGG	52433539	52433815	+	0	1
INF1_smMIP_DNAH1_225	3:52433592-52433743/19,21/-	0.851966	3	52433725	52433743	GGCCTTGCGGTTGGGTGTT	1	52433592	52433612	AGCACCCTACTTGGGGTCTTT	1	52433613	52433724	GGCAAGAGCCAGATAACGGCCATCTCTGTGTACAGCTCCTTGGGCTGAGACTCAGCCAGCTGGAAGGCCTCTGGATCCCAGCGGGCACCTTCCAGGAATAATCCATGGATAT	AGCACCCTACTTGGGGTCTTTCTTCAGCTTCCCGATATCCGACGGTAGTGTNNNNNGGCCTTGCGGTTGGGTGTT	52433539	52433815	-	10	10
INF1_smMIP_DNAH1_226	3:52433656-52433807/16,24/-	0.870918	3	52433792	52433807	CAGGCCTCATACCAGC	2	52433656	52433679	TGAGACTCAGCCAGCTGGAAGGCC	1	52433680	52433791	ACGAGTCAGTGTCTTGTAGATGGGGCACAGGTAAAAGTCCTGGTCCTGGGCCTTGCGGTTGGGTGTTGGCAAGAGCCAGATAACGGCCATCTCTGTGTACAGCTCCTTGGGC	TGAGACTCAGCCAGCTGGAAGGCCCTTCAGCTTCCCGATATCCGACGGTAGTGTNNNNNCAGGCCTCATACCAGC	52433539	52433815	-	0	10
INF1_smMIP_DNAH1_227	3:52433701-52433852/16,24/-	0.893796	3	52433837	52433852	GCTGGGTTAGTCCTGG	2	52433701	52433724	GGCAAGAGCCAGATAACGGCCATC	1	52433725	52433836	GTCCCCGCCCATAGTGTAGGCTCCCATCCCAGGCCTCATACCAGCACGAGTCAGTGTCTTGTAGATGGGGCACAGGTAAAAGTCCTGGTCCTGGGCCTTGCGGTTGGGTGTT	GGCAAGAGCCAGATAACGGCCATCCTTCAGCTTCCCGATATCCGACGGTAGTGTNNNNNGCTGGGTTAGTCCTGG	52433539	52433815	-	0	1
INF1_smMIP_DNAH1_228	3:52434261-52434412/21,19/-	0.899006	3	52434392	52434412	GCTGGGGCTGATGGGTGGGGA	1	52434261	52434279	GTAGGGGCAGGGCAGTGGG	1	52434280	52434391	TCTCCACAGCAATGACATAGTTGGTAGAGTGTCCTGTGGTTGATAGTGTTCCTGGAATGGGCAAGGAGGGGGACGGGTTAGGTCATGCCCTATTACTACTAGCAGGGATAGC	GTAGGGGCAGGGCAGTGGGCTTCAGCTTCCCGATATCCGACGGTAGTGTNNNNNGCTGGGGCTGATGGGTGGGGA	52434319	52434482	-	0	20
INF1_smMIP_DNAH1_229	3:52434340-52434491/16,24/-	0.876127	3	52434476	52434491	TTTAATGGCCCCAGCC	1	52434340	52434363	GTGTCCTGTGGTTGATAGTGTTCC	1	52434364	52434475	CTTCTGTCTGAGTCTAGTAGTCCAGGGCACAGATGAGGGCCACACCACGCTTTATCCAGTGTCGCTGGGGCTGATGGGTGGGGATCTCCACAGCAATGACATAGTTGGTAGA	GTGTCCTGTGGTTGATAGTGTTCCCTTCAGCTTCCCGATATCCGACGGTAGTGTNNNNNTTTAATGGCCCCAGCC	52434319	52434482	-	0	1
INF1_smMIP_DNAH1_230	3:52434416-52434567/20,20/-	0.907044	3	52434548	52434567	CCCCTGGCAGTGAGTCCTGC	1	52434416	52434435	CACACCACGCTTTATCCAGT	1	52434436	52434547	AGAGGGGTCCTCATGCAAGCAGCTAAGGCACAGCTGGACTGCTTAGAAAATTCAGCTTTAATGGCCCCAGCCCTTCTGTCTGAGTCTAGTAGTCCAGGGCACAGATGAGGGC	CACACCACGCTTTATCCAGTCTTCAGCTTCCCGATATCCGACGGTAGTGTNNNNNCCCCTGGCAGTGAGTCCTGC	52434319	52434482	-	0	1
INF1_smMIP_TACR3_1	4:104510795-104510946/17,23/-	0.906351	4	104510930	104510946	CCAAGAGACCCAAGTTT	2	104510795	104510817	ATTAGTGTGAGACCATCATGGTG	1	104510818	104510929	CAATGGCTGCTCTCGCAGGAATTCCAAATCTGCCTCCGCCACTTCAAGTTTCATAAGCTCACCCTATACCTCTGTGGATGAATATTCTTAATTCCATTTCCTGAGGTAAAAG	ATTAGTGTGAGACCATCATGGTGCTTCAGCTTCCCGATATCCGACGGTAGTGTNNNNNCCAAGAGACCCAAGTTT	104510817	104511171	-	0	1
INF1_smMIP_TACR3_2	4:104510911-104511062/21,19/-	0.900211	4	104511042	104511062	TTCATCCAAACCGGCAAAGCA	1	104510911	104510929	CAATGGCTGCTCTCGCAGG	1	104510930	104511041	GTATGTACACCGTGACCAGAATGGAGTCCATGACAGTCGTGTTTGACCCCAACGATGCAGACACCACCAGGTCCAGTCGGAAGAAAAGAGCAACGCCAAGAGACCCAAGTTT	CAATGGCTGCTCTCGCAGGCTTCAGCTTCCCGATATCCGACGGTAGTGTNNNNNTTCATCCAAACCGGCAAAGCA	104510817	104511171	-	0	1
INF1_smMIP_TACR3_3	4:104511023-104511174/21,19/-	0.90079	4	104511154	104511174	TTCTGTGGCCTGCTTTTCCTC	1	104511023	104511041	GTATGTACACCGTGACCAG	1	104511042	104511153	AGATTTCGAGCTGGCTTCAAGAGAGCATTTCGCTGGTGTCCTTTCATCAAAGTTTCCAGCTATGATGAGCTAGAGCTCAAGACCACCAGGTTTCATCCAAACCGGCAAAGCA	GTATGTACACCGTGACCAGCTTCAGCTTCCCGATATCCGACGGTAGTGTNNNNNTTCTGTGGCCTGCTTTTCCTC	104510817	104511171	-	0	1
INF1_smMIP_TACR3_4	4:104511063-104511214/16,24/+	0.916795	4	104511063	104511078	ACCTGGTGGTCTTGAG	3	104511191	104511214	TCAAGCAGATATGTCTTTCAGCTG	1	104511079	104511190	CTCTAGCTCATCATAGCTGGAAACTTTGATGAAAGGACACCAGCGAAATGCTCTCTTGAAGCCAGCTCGAAATCTGAGGAAAAGCAGGCCACAGAAAGAAAAAGTTATTTTT	TCAAGCAGATATGTCTTTCAGCTGCTTCAGCTTCCCGATATCCGACGGTAGTGTNNNNNACCTGGTGGTCTTGAG	104510817	104511171	+	0	1
INF1_smMIP_TACR3_5	4:104512593-104512744/18,22/+	0.928417	4	104512593	104512610	CAGTGAAGGTGGGTGTGA	3	104512723	104512744	GCTGGATGTATTTCCATCTATT	1	104512611	104512722	CAAGCAACTTGCATTTCGTAGTTTTGTTTTTACCTTTTATTCAGACAGCAGTAGATGATGGGATTGTACATGGTTGAGCTCATTGCCAGCCAAAAGCTAGCCAGGTAGACCT	GCTGGATGTATTTCCATCTATTCTTCAGCTTCCCGATATCCGACGGTAGTGTNNNNNCAGTGAAGGTGGGTGTGA	104512622	104512860	+	0	1
INF1_smMIP_TACR3_6b	4:104512666-104512817/18,22/+	0.909388	4	104512666	104512683	TGATGGGATTGTACATGG	2	104512796	104512817	GCAGATAGCAAAGGTCATGACA	1	104512684	104512795	TTGAGCTCATTGCCAGCCAAAAGCTAGCCAGGTAGACCTGCTGGATGTATTTCCATCTATTTAGTTGTTGATAGATTGCAGTGAGAATGAAGTAAATATGATAGGGCAGCCA	GCAGATAGCAAAGGTCATGACACTTCAGCTTCCCGATATCCGACGGTAGTGTNNNNNTGATGGGATTGTACATGG	104512622	104512860	+	0	1
INF1_smMIP_TACR3_6	4:104512666-104512817/18,22/+	0.909388	4	104512666	104512683	TGATGGGATTGTACATGG	2	104512796	104512817	GCAGATAGCAAATGTCATGACA	1	104512684	104512795	TTGAGCTCATTGCCAGCCAAAAGCTAGCCAGGTAGACCTGCTGGATGTATTTCCATCTATTTAGTTGTTGATAGATTGCAGTGAGAATGAAGTAAATATGATAGGGCAGCCA	GCAGATAGCAAATGTCATGACACTTCAGCTTCCCGATATCCGACGGTAGTGTNNNNNTGATGGGATTGTACATGG	104512622	104512860	+	0	1
INF1_smMIP_TACR3_7	4:104512770-104512921/19,21/-	0.80349	4	104512903	104512921	GCAGAAAAGCATGATTTGC	1	104512770	104512790	GCCCTATCATATTTACTTCAT	1	104512791	104512902	AATAAGCTATTGGAACTATTATGAGTATTATATTTGTCAAAAATGACTTTTTTTCTTTATAGGTTGTCAAAATGATGATTATTGTTGTCATGACATTTGCTATCTGCTGGCT	GCCCTATCATATTTACTTCATCTTCAGCTTCCCGATATCCGACGGTAGTGTNNNNNGCAGAAAAGCATGATTTGC	104512622	104512860	-	0	1
INF1_smMIP_TACR3_8	4:104577278-104577429/21,19/-	0.896165	4	104577409	104577429	TGGAATTACTCTCTGGGGAGG	1	104577278	104577296	GAAAAGCAATCTAGTCATG	1	104577297	104577408	AGAAATCCCAGGAGATACCTGTGACAAGTATCATGAGCAGCTAAAGGCCAAAAGAAAGGTACTGGTCCATGTTGTTTACCTAGCATTTGTATAGGTTATGGTATATCAGAAA	GAAAAGCAATCTAGTCATGCTTCAGCTTCCCGATATCCGACGGTAGTGTNNNNNTGGAATTACTCTCTGGGGAGG	104577329	104577521	-	0	1
INF1_smMIP_TACR3_9	4:104577388-104577539/19,21/-	0.934721	4	104577521	104577539	ATAAGGTCTTCAGCATGTG	2	104577388	104577408	AGAAATCCCAGGAGATACCTG	1	104577409	104577520	TTTTTCTTATTTTTCATAGTTACCATATTATCGTCATTATACTGGTGTACTGTTTCCCATTGCTCATCATGGGTATTACATACACCATTGTTGGAATTACTCTCTGGGGAGG	AGAAATCCCAGGAGATACCTGCTTCAGCTTCCCGATATCCGACGGTAGTGTNNNNNATAAGGTCTTCAGCATGTG	104577329	104577521	-	0	1
INF1_smMIP_TACR3_10	4:104577390-104577541/20,20/+	0.90984	4	104577390	104577409	GGTATCTCCTGGGATTTCTC	1	104577522	104577541	ACATGCTGAAGACCTTATTG	1	104577410	104577521	CTCCCCAGAGAGTAATTCCAACAATGGTGTATGTAATACCCATGATGAGCAATGGGAAACAGTACACCAGTATAATGACGATAATATGGTAACTATGAAAAATAAGAAAAAC	ACATGCTGAAGACCTTATTGCTTCAGCTTCCCGATATCCGACGGTAGTGTNNNNNGGTATCTCCTGGGATTTCTC	104577329	104577521	+	0	1
INF1_smMIP_TACR3_11	4:104579291-104579442/16,24/-	0.853644	4	104579427	104579442	AAAACCAAAGTCATGC	5	104579291	104579314	CAGATTAGGAGCAACAATTAAATA	1	104579315	104579426	CAGGCCGTACTCTCTGCTTTGTGCAATGGCCAGAAGGTCCCAAACAACATTTCACGTAAGTTAATTCTCTATTATGGTTTTCAATTCAGTTTATCAAACATTTAGGAAACTA	CAGATTAGGAGCAACAATTAAATACTTCAGCTTCCCGATATCCGACGGTAGTGTNNNNNAAAACCAAAGTCATGC	104579350	104579580	-	0	1
INF1_smMIP_TACR3_12	4:104579393-104579544/21,19/+	0.933345	4	104579393	104579413	TCTGGCCATTGCACAAAGCAG	1	104579526	104579544	GTCTGGGTTTCAAGGGATC	1	104579414	104579525	AGAGTACGGCCTGGCATGACTTTGGTTTTGGAATAAAGACACTGAGGGAAGGCAAGTAGAAATGCTAGAATCCAAATACTTCCAATGACAATCTTGGTTGCTGTAGCAGACA	GTCTGGGTTTCAAGGGATCCTTCAGCTTCCCGATATCCGACGGTAGTGTNNNNNTCTGGCCATTGCACAAAGCAG	104579350	104579580	+	0	1
INF1_smMIP_TACR3_13	4:104579501-104579652/16,24/-	0.893166	4	104579637	104579652	CTATTGAAACGCCTTT	2	104579501	104579524	GTCTGCTACAGCAACCAAGATTGT	1	104579525	104579636	GAAATACCTTTGAAACTCCATTTCAAACTCTGTTATAAAGAAAACCAATGAAATGGTTTTGTTTGTTTTTATATAGGTATATGGCTATTATTGATCCCTTGAAACCCAGACT	GTCTGCTACAGCAACCAAGATTGTCTTCAGCTTCCCGATATCCGACGGTAGTGTNNNNNCTATTGAAACGCCTTT	104579350	104579580	-	0	1
INF1_smMIP_TACR3_14	4:104640244-104640395/20,20/-	0.92352	4	104640376	104640395	GCTTCATAGCGAGTGGTACT	1	104640244	104640263	AGGAAAGAGGGAGAAGGGAA	4	104640264	104640375	TTGGCGCCAACTACTGCCGCTTCCAGAACTTCTTTCCTATCACAGCTGTGTTCGCCAGCATCTACTCCATGACGGCCATTGCGGTGGACAGGTGAGGAGAGGACAGACAGAG	AGGAAAGAGGGAGAAGGGAACTTCAGCTTCCCGATATCCGACGGTAGTGTNNNNNGCTTCATAGCGAGTGGTACT	104640263	104640852	-	0	10
INF1_smMIP_TACR3_15	4:104640355-104640506/21,19/+	0.92968	4	104640355	104640375	AGCGGCAGTAGTTGGCGCCAA	1	104640488	104640506	GCGCTTGTGGGCCAGGATG	1	104640376	104640487	AGTACCACTCGCTATGAAGCGCGTAGATGAAATTGACCAACGTGTTGAAGGCGGCCATGGAGGCGTCGGAGAAAGCCAGGTTCACAAGGAAGTAGTTGGTGACAGTCCTCAT	GCGCTTGTGGGCCAGGATGCTTCAGCTTCCCGATATCCGACGGTAGTGTNNNNNAGCGGCAGTAGTTGGCGCCAA	104640263	104640852	+	0	1
INF1_smMIP_TACR3_16	4:104640432-104640583/20,20/-	0.902088	4	104640564	104640583	CGCATCGCGCTCTGGTCCCT	1	104640432	104640451	GCTTTCTCCGACGCCTCCAT	1	104640452	104640563	GGCGTATGGTGTGGTGGTGGCAGTGGCAGTTTTGGGAAATCTCATCGTCATCTGGATCATCCTGGCCCACAAGCGCATGAGGACTGTCACCAACTACTTCCTTGTGAACCTG	GCTTTCTCCGACGCCTCCATCTTCAGCTTCCCGATATCCGACGGTAGTGTNNNNNCGCATCGCGCTCTGGTCCCT	104640263	104640852	-	0	1
INF1_smMIP_TACR3_17	4:104640492-104640643/19,21/-	0.78415	4	104640625	104640643	TCCCCCGCGCCCTCCCAGC	1	104640492	104640512	CTGGATCATCCTGGCCCACAA	1	104640513	104640624	CCTGGGCCAACCTCACCAACCAGTTCGTGCAGCCGTCCTGGCGCATCGCGCTCTGGTCCCTGGCGTATGGTGTGGTGGTGGCAGTGGCAGTTTTGGGAAATCTCATCGTCAT	CTGGATCATCCTGGCCCACAACTTCAGCTTCCCGATATCCGACGGTAGTGTNNNNNTCCCCCGCGCCCTCCCAGC	104640263	104640852	-	0	1
INF1_smMIP_TACR3_18	4:104640595-104640746/16,24/-	0.655059	4	104640731	104640746	TGCCGGGGCGGCCACG	1	104640595	104640618	CCAACCTCACCAACCAGTTCGTGC	1	104640619	104640730	GGGGCAGTTGAGACTGGGTGGCTGCAACTGCTGGACCAAGCTGGCAACCTCTCCTCCTCCCCTTCCGCGCTGGGACTGCCTGTGGCTTCCCCCGCGCCCTCCCAGCCCTGGG	CCAACCTCACCAACCAGTTCGTGCCTTCAGCTTCCCGATATCCGACGGTAGTGTNNNNNTGCCGGGGCGGCCACG	104640263	104640852	-	0	1
INF1_smMIP_TACR3_19	4:104640661-104640812/16,24/-	0.462222	4	104640797	104640812	AGAAACCTGGATAGAC	4	104640661	104640684	ACCTCTCCTCCTCCCCTTCCGCGC	1	104640685	104640796	GGGGGTGGAGGCGTGGGTGCAGACGCCGTGAACCTGACCGCCTCGCTAGCTGCCGGGGCGGCCACGGGGGCAGTTGAGACTGGGTGGCTGCAACTGCTGGACCAAGCTGGCA	ACCTCTCCTCCTCCCCTTCCGCGCCTTCAGCTTCCCGATATCCGACGGTAGTGTNNNNNAGAAACCTGGATAGAC	104640263	104640852	-	0	1
INF1_smMIP_TACR3_20	4:104640776-104640927/21,19/-	0.53575	4	104640907	104640927	CAAAGTGACCAGGAGGCAGAG	2	104640776	104640794	GGGTGGAGGCGTGGGTGCA	1	104640795	104640906	AAGAACTTCAGAGGAGTCTCGTCTTGGGCTGCCCGTGGGTGAGTGGGAGGGTCCGGGACTGCAGACCGGTGGCGATGGCCACTCTCCCAGCAGCAGAAACCTGGATAGACGG	GGGTGGAGGCGTGGGTGCACTTCAGCTTCCCGATATCCGACGGTAGTGTNNNNNCAAAGTGACCAGGAGGCAGAG	104640263	104640852	-	0	1
INF1_smMIP_CYP21A2_1	6:31973383-31973534/20,20/-	0.871598	6	31973515	31973534	CCACCAGTTCCACAGCAGGC	3	31973383	31973402	TGCTGTGTAGACTGTTTTGG	2	31973403	31973514	GGGCGCCAGCCAGCAGGGGCAGCAGCAGCAGCAGGCCCAGGAGCAGCATGGCAAGACGCCCGTCAGGGCCCTGAGGTGCCACTTATAGCTCAAGAGCCCCAGCCATCCCTCC	TGCTGTGTAGACTGTTTTGGCTTCAGCTTCCCGATATCCGACGGTAGTGTNNNNNCCACCAGTTCCACAGCAGGC	31973444	31973874	-	0	20
INF1_smMIP_CYP21A2_2	6:31973476-31973627/16,24/-	0.74808	6	31973612	31973627	CTGAGTCAGGCCAAGC	4	31973476	31973499	GGGGCAGCAGCAGCAGCAGGCCCA	2	31973500	31973611	AGATAGATGGGGAGGTCGGGCTGCAGCAGGTGCAAGAAGCCCGGGGCAAGAGGCAGGAGGTGGAGGCTCCGGAGCTTCCACCAGTTCCACAGCAGGCGGGCGCCAGCCAGCA	GGGGCAGCAGCAGCAGCAGGCCCACTTCAGCTTCCCGATATCCGACGGTAGTGTNNNNNCTGAGTCAGGCCAAGC	31973444	31973874	-	0	1
INF1_smMIP_CYP21A2_3	6:31973539-31973690/16,24/-	0.895982	6	31973675	31973690	CCAGAGCGAGATCAGC	2	31973539	31973562	GAGGCAGGAGGTGGAGGCTCCGGA	1	31973563	31973674	CTCTCACCTTGCAGCCCAAGGTGGAGCCTGTAGATGGGCCCGAATTTCTGAGTCAGGCCAAGCAGATAGATGGGGAGGTCGGGCTGCAGCAGGTGCAAGAAGCCCGGGGCAA	GAGGCAGGAGGTGGAGGCTCCGGACTTCAGCTTCCCGATATCCGACGGTAGTGTNNNNNCCAGAGCGAGATCAGC	31973444	31973874	-	0	1
INF1_smMIP_CYP21A2_4	6:31973599-31973750/16,24/+	0.89517	6	31973599	31973614	TCCCCATCTATCTGCT	11	31973727	31973750	GTCCTCTCTCCGCTGACGCTGCTT	2	31973615	31973726	TGGCCTGACTCAGAAATTCGGGCCCATCTACAGGCTCCACCTTGGGCTGCAAGGTGAGAGGCTGATCTCGCTCTGGCCCTCACCATAGGAGGGGGCGGAGGTGACGGAGAGG	GTCCTCTCTCCGCTGACGCTGCTTCTTCAGCTTCCCGATATCCGACGGTAGTGTNNNNNTCCCCATCTATCTGCT	31973444	31973874	+	0	1
INF1_smMIP_CYP21A2_5	6:31973697-31973848/19,21/-	0.907536	6	31973830	31973848	GTGGCTCAGGTCTGCCAGC	2	31973697	31973717	CACCTCCGCCCCCTCCTATGG	2	31973718	31973829	AAAGTCTGCCCACTTTTTGACCATGGCTTCCTCAATGGTCCTCTTGGAGTTCAGCACCACCACATCTGGGAGACAGCCAAAGCAGCGTCAGCGGAGAGAGGACCCTCTCCGT	CACCTCCGCCCCCTCCTATGGCTTCAGCTTCCCGATATCCGACGGTAGTGTNNNNNGTGGCTCAGGTCTGCCAGC	31973444	31973874	-	0	1
INF1_smMIP_CYP21A2_6	6:31973772-31973923/17,23/+	0.942331	6	31973772	31973788	GGTGCTGAACTCCAAGA	2	31973901	31973923	GTTAGAGATGGGGTCTTGCTATG	16	31973789	31973900	GGACCATTGAGGAAGCCATGGTCAAAAAGTGGGCAGACTTTGCTGGCAGACCTGAGCCACTTACCTGTAAGGGCCGGGGGCATTTTTTCTTTCTTAAACAAATTTTTTTTTT	GTTAGAGATGGGGTCTTGCTATGCTTCAGCTTCCCGATATCCGACGGTAGTGTNNNNNGGTGCTGAACTCCAAGA	31973444	31973874	+	0	1
INF1_smMIP_CYP21A2_7	6:31974035-31974186/21,19/-	0.835315	6	31974166	31974186	AGAGACCAACGACAGGTCCGG	1	31974035	31974053	CTCCTGAAGATATGCCCCC	1	31974054	31974165	GTAGTTCTTAGACACCAGCTTGTCTGCAGGAGGAGCTGGGGGCTGGAGGGTGGGAACTGACCAAGGAAGCCGAGGGCCTGACCTTCTTCTGCCTCCTCAACACCTGCTTCTT	CTCCTGAAGATATGCCCCCCTTCAGCTTCCCGATATCCGACGGTAGTGTNNNNNAGAGACCAACGACAGGTCCGG	31974121	31974896	-	0	20
INF1_smMIP_CYP21A2_8	6:31974132-31974283/16,24/-	0.82632	6	31974268	31974283	GAACTCCTGGGTCAGC	4	31974132	31974155	GACACCAGCTTGTCTGCAGGAGGA	2	31974156	31974267	TGCTCCACCACTGGCTCCATGGAGTCACGGATGCCCAGCAGCAGGGCTGAGCGGGTGAGCTTCTTGTGGGCTTTCCAGAGCAGAGACCAACGACAGGTCCGGGTAGTTCTTA	GACACCAGCTTGTCTGCAGGAGGACTTCAGCTTCCCGATATCCGACGGTAGTGTNNNNNGAACTCCTGGGTCAGC	31974121	31974896	-	0	5
INF1_smMIP_CYP21A2_9	6:31974235-31974386/16,24/-	0.774661	6	31974371	31974386	ACAGTGTGAGTTCAGC	4	31974235	31974258	ACTGGCTCCATGGAGTCACGGATG	2	31974259	31974370	AGGCCGCTGTGCAGCGGGCAGGGCGGGGGCTACTGTGAGAGGCGAGGCTGACCCGAGGTGGCCTCAGGAGCCCAGCCTTACCTCACAGAACTCCTGGGTCAGCTGCTCCACC	ACTGGCTCCATGGAGTCACGGATGCTTCAGCTTCCCGATATCCGACGGTAGTGTNNNNNACAGTGTGAGTTCAGC	31974121	31974896	-	0	1
INF1_smMIP_CYP21A2_10	6:31974318-31974469/22,18/-	0.512326	6	31974448	31974469	AGTTGATGCTGCAGGTGAGGAG	1	31974318	31974335	TGAGAGGCGAGGCTGACC	2	31974336	31974447	AGAGAATTCCTCCTCAATGGCCACAGGGGTGCCGGGCTGGGCTCTCATGCGCTGTGGAGAAACAGTGTGAGTTCAGCAGGCCGCTGTGCAGCGGGCAGGGCGGGGGCTACTG	TGAGAGGCGAGGCTGACCCTTCAGCTTCCCGATATCCGACGGTAGTGTNNNNNAGTTGATGCTGCAGGTGAGGAG	31974121	31974896	-	0	1
INF1_smMIP_CYP21A2_11	6:31974377-31974528/16,24/+	0.814536	6	31974377	31974392	CTCACACTGTTTCTCC	7	31974505	31974528	CACAGCCCCTCAGGCCCACCCCCA	2	31974393	31974504	ACAGCGCATGAGAGCCCAGCCCGGCACCCCTGTGGCCATTGAGGAGGAATTCTCTCTCCTCACCTGCAGCATCAACTGTTACCTCACCTTCGGAGACAAGATCAAGGTGCCT	CACAGCCCCTCAGGCCCACCCCCACTTCAGCTTCCCGATATCCGACGGTAGTGTNNNNNCTCACACTGTTTCTCC	31974121	31974896	+	0	20
INF1_smMIP_CYP21A2_12	6:31974442-31974593/17,23/+	0.684714	6	31974442	31974458	TTCTCTCTCCTCACCTG	9	31974571	31974593	CATCCTTTCCTGGCAGGAGGACA	1	31974459	31974570	CAGCATCAACTGTTACCTCACCTTCGGAGACAAGATCAAGGTGCCTCACAGCCCCTCAGGCCCACCCCCAGCCCCTCCCTGAGCCTCTCCTTGTCCTGAACTGAAAGTACTC	CATCCTTTCCTGGCAGGAGGACACTTCAGCTTCCCGATATCCGACGGTAGTGTNNNNNTTCTCTCTCCTCACCTG	31974121	31974896	+	0	20
INF1_smMIP_CYP21A2_13	6:31974547-31974698/19,21/+	0.900043	6	31974547	31974565	CCTTGTCCTGAACTGAAAG	2	31974678	31974698	CCTTTCTCAGGGTGAGGACCT	2	31974566	31974677	TACTCCATCCTTTCCTGGCAGGAGGACAACTTAATGCCTGCCTATTACAAATGTATCCAGGAGGTGTTAAAAACCTGGAGCCACTGGTCCATCCAAATTGTGGACGTGATTC	CCTTTCTCAGGGTGAGGACCTCTTCAGCTTCCCGATATCCGACGGTAGTGTNNNNNCCTTGTCCTGAACTGAAAG	31974121	31974896	+	0	1
INF1_smMIP_CYP21A2_14	6:31974627-31974778/16,24/-	0.838633	6	31974763	31974778	AGCATGAGAATGCAGC	8	31974627	31974650	AGTGGCTCCAGGTTTTTAACACCT	2	31974651	31974762	TGTGGGAAGGAGCCTCTCCCTCCACCCCAGCCTCTCCCCTACAACCCAGGGGTGTCTAGGCTCCAGGTCCTCACCCTGAGAAAGGGAATCACGTCCACAATTTGGATGGACC	AGTGGCTCCAGGTTTTTAACACCTCTTCAGCTTCCCGATATCCGACGGTAGTGTNNNNNAGCATGAGAATGCAGC	31974121	31974896	-	0	10
INF1_smMIP_CYP21A2_15	6:31974680-31974831/16,24/-	0.88671	6	31974816	31974831	TATGGCCTGCTTCAGC	2	31974680	31974703	GCTCCAGGTCCTCACCCTGAGAAA	2	31974704	31974815	CTCCGGAGACCTGGATTGGGGAAGAACTGCGGCAGGAAGCATGAGAATGCAGCTGTGGGAAGGAGCCTCTCCCTCCACCCCAGCCTCTCCCCTACAACCCAGGGGTGTCTAG	GCTCCAGGTCCTCACCCTGAGAAACTTCAGCTTCCCGATATCCGACGGTAGTGTNNNNNTATGGCCTGCTTCAGC	31974121	31974896	-	0	1
INF1_smMIP_CYP21A2_16	6:31974767-31974918/21,19/+	0.889235	6	31974767	31974787	CATTCTCATGCTTCCTGCCGC	2	31974900	31974918	TCCCCTCGGCCCACAGCCA	2	31974788	31974899	AGTTCTTCCCCAATCCAGGTCTCCGGAGGCTGAAGCAGGCCATAGAGAAGAGGGACCACAACGAGGAGAAGCAGCTGAGGCAGCACAAGGTGGGGACTGTGTGTGGACGGCC	TCCCCTCGGCCCACAGCCACTTCAGCTTCCCGATATCCGACGGTAGTGTNNNNNCATTCTCATGCTTCCTGCCGC	31974121	31974896	+	0	10
INF1_smMIP_CYP21A2_17	6:31974922-31975073/16,24/-	0.774457	6	31975058	31975073	CCCTCCACTGGCCTGC	6	31974922	31974945	TAGCAATGCTGAGGCCGGTAGCAT	2	31974946	31975057	CACCAGGCTCTCCTGCAGAGGGTGAAAGGAGCGGGCTGAGCGGCTGGCCTGGGGAGAGGAGTACAGAGTGGCAACAGGCCCATAACTGGGGTATGCAAAAGAACCCGCCTCA	TAGCAATGCTGAGGCCGGTAGCATCTTCAGCTTCCCGATATCCGACGGTAGTGTNNNNNCCCTCCACTGGCCTGC	31975024	31975267	-	0	20
INF1_smMIP_CYP21A2_18	6:31975020-31975171/16,24/-	0.858149	6	31975156	31975171	GTCCACTGCAGCCATG	7	31975020	31975043	GCAGAGGGTGAAAGGAGCGGGCTG	2	31975044	31975155	TGCAAGTGCCCTTCCAGGAGCTGTCCAGAGCCCTCTTCCATGCTCGGCTGCGCCACCCCTTGGAGCATGTAGTCCATCATGTCCCTCCACTGGCCTGCCACCAGGCTCTCCT	GCAGAGGGTGAAAGGAGCGGGCTGCTTCAGCTTCCCGATATCCGACGGTAGTGTNNNNNGTCCACTGCAGCCATG	31975024	31975267	-	0	1
INF1_smMIP_CYP21A2_19	6:31975079-31975230/16,24/+	0.890498	6	31975079	31975094	ATGGACTACATGCTCC	10	31975207	31975230	CCTCTCCTGGGCCGTGGTTTTTTT	2	31975095	31975206	AAGGGGTGGCGCAGCCGAGCATGGAAGAGGGCTCTGGACAGCTCCTGGAAGGGCACTTGCACATGGCTGCAGTGGACCTCCTGATCGGTGGCACTGAGACCACAGCAAACAC	CCTCTCCTGGGCCGTGGTTTTTTTCTTCAGCTTCCCGATATCCGACGGTAGTGTNNNNNATGGACTACATGCTCC	31975024	31975267	+	0	1
INF1_smMIP_CYP21A2_20	6:31975181-31975332/16,24/-	0.855866	6	31975317	31975332	GCACAGTGCTCAGAGC	6	31975181	31975204	GTTTGCTGTGGTCTCAGTGCCACC	2	31975205	31975316	TGAGTGAGGGTGCCCACCGCCCTGGCCAGGTTGCTGGGAAGGAGCCTTTTGCTTGTCCGCAGGACGCACCTCAGGGTGGTGAAGCAAAAAAAACCACGGCCCAGGAGAGGGT	GTTTGCTGTGGTCTCAGTGCCACCCTTCAGCTTCCCGATATCCGACGGTAGTGTNNNNNGCACAGTGCTCAGAGC	31975024	31975267	-	0	10
INF1_smMIP_CYP21A2_21	6:31975328-31975479/16,24/+	0.85849	6	31975328	31975343	TGTGCGGCTGGGGCTG	5	31975456	31975479	GCGACTGTAGGAGGAGCTAGACCA	1	31975344	31975455	TGCTTGCCTCACCGGCACTCAGGCTCACTGGGTTGCTGAGGGAGCGGCTGGAGGCTGGGCAGCTGTGGGCTGCTGGGGCAGGACTCCACCCGATCATTCCCCAGATTCAGCA	GCGACTGTAGGAGGAGCTAGACCACTTCAGCTTCCCGATATCCGACGGTAGTGTNNNNNTGTGCGGCTGGGGCTG	31975426	31976196	+	0	1
INF1_smMIP_CYP21A2_22	6:31975434-31975585/19,21/-	0.661069	6	31975567	31975585	AACGGGCCACAGGCGCAGC	1	31975434	31975454	GCTGAATCTGGGGAATGATCG	2	31975455	31975566	ACCTCGGCGATGGTGGCATTGAGCAAGGGCAGCCGTGCACGGTCCTTGTAGGGGACCCGGGAGCTGGAGGCACCAGGGCCCAGTTCGTGGTCTAGCTCCTCCTACAGTCGCT	GCTGAATCTGGGGAATGATCGCTTCAGCTTCCCGATATCCGACGGTAGTGTNNNNNAACGGGCCACAGGCGCAGC	31975426	31976196	-	0	1
INF1_smMIP_CYP21A2_23	6:31975544-31975695/22,18/-	0.564606	6	31975674	31975695	AGTTAGAGGCTGGCCAGGACCT	2	31975544	31975561	GGCGATGGTGGCATTGAG	2	31975562	31975673	CCCTGGGCTCGGGCTTTCCTCACTCATCCCCAACCCTCGGGAGTCACCTGCTGGGCCGTGTGGTGCGGTGGGGCAAGGCTAAGGGCACAACGGGCCACAGGCGCAGCACCTC	GGCGATGGTGGCATTGAGCTTCAGCTTCCCGATATCCGACGGTAGTGTNNNNNAGTTAGAGGCTGGCCAGGACCT	31975426	31976196	-	0	1
INF1_smMIP_CYP21A2_24	6:31975630-31975781/16,24/-	0.813544	6	31975766	31975781	GTCTCATCCAGGTGGG	2	31975630	31975653	CACTCATCCCCAACCCTCGGGAGT	2	31975654	31975765	CGCCTTGGAGGTTCGGAATGATGACTGTGCCCTCAGGGATGTCGTAGCCGGAGATGCTGAAGGGGGCTGGAGTTAGAGGCTGGCCAGGACCTCCCTGGGCTCGGGCTTTCCT	CACTCATCCCCAACCCTCGGGAGTCTTCAGCTTCCCGATATCCGACGGTAGTGTNNNNNGTCTCATCCAGGTGGG	31975426	31976196	-	0	1
INF1_smMIP_CYP21A2_25	6:31975700-31975851/16,24/-	0.737128	6	31975836	31975851	ACCACATTTTCATGGC	8	31975700	31975723	CGTAGCCGGAGATGCTGAAGGGGG	2	31975724	31975835	AGGCCCCCGGCCCCCCACATACCAGGCCAGAACTCATGTGGCCTCTCCCAGACCGTCTCATCCAGGTGGGCGCCTTGGAGGTTCGGAATGATGACTGTGCCCTCAGGGATGT	CGTAGCCGGAGATGCTGAAGGGGGCTTCAGCTTCCCGATATCCGACGGTAGTGTNNNNNACCACATTTTCATGGC	31975426	31976196	-	0	20
INF1_smMIP_CYP21A2_26	6:31975812-31975963/19,21/+	0.624813	6	31975812	31975830	TGGTATGTGGGGGGCCGGG	2	31975943	31975963	GCTCTGGCCTTCGGCTGCGGT	2	31975831	31975942	GGCCTGCCATGAAAATGTGGTGGAGGCTGGTCCCCGCTGCCGCTGAACGCCTCCCCACCCACCTGTCCACCCGCCCGCAGATCGCTTCCTGGAGCCAGGCAAGAACTCCAGA	GCTCTGGCCTTCGGCTGCGGTCTTCAGCTTCCCGATATCCGACGGTAGTGTNNNNNTGGTATGTGGGGGGCCGGG	31975426	31976196	+	0	20
INF1_smMIP_CYP21A2_27	6:31975911-31976062/22,18/-	0.320974	6	31976041	31976062	GGCGTCCCCGGAGGGCAGCAGC	2	31975911	31975928	CTGGCTCCAGGAAGCGAT	2	31975929	31976040	GTGAAGGCCTGCAGCAGTCGGGTCAGCACCACGAAGAGCTCCAGGCGCGCCAGCGGCTCGCCCAGGCACACGCGGGCACCGCAGCCGAAGGCCAGAGCTCTGGAGTTCTTGC	CTGGCTCCAGGAAGCGATCTTCAGCTTCCCGATATCCGACGGTAGTGTNNNNNGGCGTCCCCGGAGGGCAGCAGC	31975426	31976196	-	0	20
INF1_smMIP_CYP21A2_28	6:31976020-31976171/21,19/-	0.334444	6	31976151	31976171	GGTTCTGGCCTGGGCTGTGGG	1	31976020	31976038	GAAGGCCTGCAGCAGTCGG	2	31976039	31976150	CCCCCATCCCCCGGGGCTGCAGCCGCACTTGGAAAGGCTGCATCTTGAGGATGACACTGCAGTGGGGCAGGGGCTGCAGGGAGGGCAGGGCGTCCCCGGAGGGCAGCAGCGT	GAAGGCCTGCAGCAGTCGGCTTCAGCTTCCCGATATCCGACGGTAGTGTNNNNNGGTTCTGGCCTGGGCTGTGGG	31975426	31976196	-	0	20
INF1_smMIP_CYP21A2_29	6:31976111-31976262/16,24/+	0.76089	6	31976111	31976126	CAGCCTTTCCAAGTGC	16	31976239	31976262	CTCCCCTCCCCCCTGTAAACACAG	2	31976127	31976238	GGCTGCAGCCCCGGGGGATGGGGGCCCACAGCCCAGGCCAGAACCAGTGATGGGGCAGGACCGATGCCAGCCGGGTACCTCAGTTTCTCCTTTATTGCTCCCGTACGAACCC	CTCCCCTCCCCCCTGTAAACACAGCTTCAGCTTCCCGATATCCGACGGTAGTGTNNNNNCAGCCTTTCCAAGTGC	31975426	31976196	+	0	20
INF1_smMIP_CYP21A2_30	6:32006117-32006268/20,20/-	0.854706	6	32006249	32006268	CCACCAGTTCCACAGCAGGC	3	32006117	32006136	TGCTGTGTAGACTGTTTTGG	2	32006137	32006248	GGGCGCCAGCCAGCAGGGGCAGCAGCAGCAGCAGGCCCAGGAGCAGCATGGCGAGACGCCCGTCAGGGCCCTGAGGTGCCACTTATAGCTCAAGAGCCCCAGCCATCCCTCC	TGCTGTGTAGACTGTTTTGGCTTCAGCTTCCCGATATCCGACGGTAGTGTNNNNNCCACCAGTTCCACAGCAGGC	32006178	32006608	-	0	20
INF1_smMIP_CYP21A2_31	6:32006219-32006370/20,20/+	0.689984	6	32006219	32006238	TGCTGCTGCTGCCCCTGCTG	11	32006351	32006370	GCCTGACTCAGAAATTCGGG	2	32006239	32006350	GCTGGCGCCCGCCTGCTGTGGAACTGGTGGAAGCTCCGGAGCCTCCACCTCCCGCCTCTTGCCCCGGGCTTCTTGCACCTGCTGCAGCCCGACCTCCCCATCTATCTGCTTG	GCCTGACTCAGAAATTCGGGCTTCAGCTTCCCGATATCCGACGGTAGTGTNNNNNTGCTGCTGCTGCCCCTGCTG	32006178	32006608	+	0	1
INF1_smMIP_CYP21A2_32	6:32006325-32006476/16,24/-	0.89517	6	32006461	32006476	TCAGCGGAGAGAGGAC	2	32006325	32006348	AGCAGATAGATGGGGAGGTCGGGC	2	32006349	32006460	CCTCTCCGTCACCTCCGCCCCCTCCTATGGTGAGGGCCAGAGCGAGATCAGCCTCTCACCTTGCAGCCCAAGGTGGAGCCTGTAGATGGGCCCGAATTTCTGAGTCAGGCCA	AGCAGATAGATGGGGAGGTCGGGCCTTCAGCTTCCCGATATCCGACGGTAGTGTNNNNNTCAGCGGAGAGAGGAC	32006178	32006608	-	0	1
INF1_smMIP_CYP21A2_33	6:32006433-32006584/19,21/+	0.907536	6	32006433	32006451	ATAGGAGGGGGCGGAGGTG	2	32006564	32006584	GCTGGCAGACCTGAGCCACTT	2	32006452	32006563	ACGGAGAGGGTCCTCTCTCCGCTGACGCTGCTTTGGCTGTCTCCCAGATGTGGTGGTGCTGAACTCCAAGAGGACCATTGAGGAAGCCATGGTCAAAAAGTGGGCAGACTTT	GCTGGCAGACCTGAGCCACTTCTTCAGCTTCCCGATATCCGACGGTAGTGTNNNNNATAGGAGGGGGCGGAGGTG	32006178	32006608	+	0	1
INF1_smMIP_CYP21A2_34	6:32006506-32006657/17,23/+	0.912968	6	32006506	32006522	GGTGCTGAACTCCAAGA	2	32006635	32006657	AGAGATGGGTTCTTGCTATGCTG	2	32006523	32006634	GGACCATTGAGGAAGCCATGGTCAAAAAGTGGGCAGACTTTGCTGGCAGACCTGAGCCACTTACCTGTAAGGGCCGGGGGCATTTTTTCTTTCTTAAAAAAATTTTTTTTTA	AGAGATGGGTTCTTGCTATGCTGCTTCAGCTTCCCGATATCCGACGGTAGTGTNNNNNGGTGCTGAACTCCAAGA	32006178	32006608	+	0	1
INF1_smMIP_CYP21A2_35	6:32006762-32006913/20,20/-	0.84501	6	32006894	32006913	TCTCCCAAGGACAGGTCCGG	1	32006762	32006781	CCCCACCAGATATGCCCCCC	1	32006782	32006893	GTAGTTCCTAGACACCAGCTTGTCTGCAGGAGGAGGTGGGGGCTGGAGGGTGGGAACTGATGAAGGCAGCTGAGGGCCTGACCTTCTTCGGCCTCCCCAACCCCTGCTTTCT	CCCCACCAGATATGCCCCCCCTTCAGCTTCCCGATATCCGACGGTAGTGTNNNNNTCTCCCAAGGACAGGTCCGG	32006849	32007632	-	0	20
INF1_smMIP_CYP21A2_36	6:32006861-32007012/17,23/-	0.721875	6	32006996	32007012	TGGGTCAGCTGCTCCAC	2	32006861	32006883	GACACCAGCTTGTCTGCAGGAGG	2	32006884	32006995	CACTGGCTCCATGGAGTCACGGATGCCCAGCAGCAGGGCTGAGCGGGTGAGCTTCTTGTGGGCTTTCCAGAGCAGGGAGTAGTCTCCCAAGGACAGGTCCGGGTAGTTCCTA	GACACCAGCTTGTCTGCAGGAGGCTTCAGCTTCCCGATATCCGACGGTAGTGTNNNNNTGGGTCAGCTGCTCCAC	32006849	32007632	-	0	5
INF1_smMIP_CYP21A2_37	6:32006971-32007122/16,24/-	0.774661	6	32007107	32007122	ACAGTGTGAGTTCAGC	4	32006971	32006994	ACTGGCTCCATGGAGTCACGGATG	2	32006995	32007106	AGGCCGCTGTGCAGCGGGCAGGGCGGGGGCTACTGTGAGAGGCGAGGCTGACCCGAGGTGGCCTCAGGAGCCCAGCCTTACCTCACAGAACTCCTGGGTCAGCTGCTCCACC	ACTGGCTCCATGGAGTCACGGATGCTTCAGCTTCCCGATATCCGACGGTAGTGTNNNNNACAGTGTGAGTTCAGC	32006849	32007632	-	0	1
INF1_smMIP_CYP21A2_38	6:32007083-32007234/16,24/-	0.513389	6	32007219	32007234	CTTGATCTTGTCTCCG	2	32007083	32007106	AGGCCGCTGTGCAGCGGGCAGGGC	2	32007107	32007218	AAGGTGAGGTAACAGATGATGCTGCAGGTGAGGAGAGAGAATTCCTCCTCAATGGCCACAGGGGTGCCGGGCTGGGCTCTCATGCGCTGTGGAGAAACAGTGTGAGTTCAGC	AGGCCGCTGTGCAGCGGGCAGGGCCTTCAGCTTCCCGATATCCGACGGTAGTGTNNNNNCTTGATCTTGTCTCCG	32006849	32007632	-	0	1
INF1_smMIP_CYP21A2_39	6:32007170-32007321/16,24/-	0.827414	6	32007306	32007321	TGCCAGAAAAGGAGGG	4	32007170	32007193	AGGTGAGGAGAGAGAATTCCTCCT	2	32007194	32007305	AGTACTTTCAGTTCAGGACAAGGAGAGGCTCAGGGAGGGGCTGGGGGTGGGCCTGAGGGGCTGTGAGGCACCTTGATCTTGTCTCCGAAGGTGAGGTAACAGATGATGCTGC	AGGTGAGGAGAGAGAATTCCTCCTCTTCAGCTTCCCGATATCCGACGGTAGTGTNNNNNTGCCAGAAAAGGAGGG	32006849	32007632	-	0	10
INF1_smMIP_CYP21A2_40	6:32007278-32007429/20,20/+	0.902276	6	32007278	32007297	CCTCTCCTTGTCCTGAACTG	2	32007410	32007429	ATTCCCTTTCTCAGGGTGAG	2	32007298	32007409	AAAGTACTCCCTCCTTTTCTGGCAGGACGACAACTTAATGCCTGCCTATTACAAATGTATCCAGGAGGTGTTAAAAACCTGGAGCCACTGGTCCATCCAAATTGTGGACGTG	ATTCCCTTTCTCAGGGTGAGCTTCAGCTTCCCGATATCCGACGGTAGTGTNNNNNCCTCTCCTTGTCCTGAACTG	32006849	32007632	+	0	10
INF1_smMIP_CYP21A2_41	6:32007326-32007477/21,19/-	0.882997	6	32007457	32007477	CCACCCCAGCCTCTCCCCTAC	2	32007326	32007344	AGGCAGGCATTAAGTTGTC	2	32007345	32007456	AACCCAGGGGTGTCTAGGCTCCAGGTCCTCACCCTGAGAAAGGGAATCACGTCCACAATTTGGATGGACCAGTGGCTCCAGGTTTTTAACACCTCCTGGATACATTTGTAAT	AGGCAGGCATTAAGTTGTCCTTCAGCTTCCCGATATCCGACGGTAGTGTNNNNNCCACCCCAGCCTCTCCCCTAC	32006849	32007632	-	0	20
INF1_smMIP_CYP21A2_42	6:32007416-32007567/16,24/-	0.88671	6	32007552	32007567	TATGGCCTGCTTCAGC	2	32007416	32007439	GCTCCAGGTCCTCACCCTGAGAAA	2	32007440	32007551	CTCCGGAGACCTGGATTGGGGAAGAACTGCGGCAGGAAGCATGAGAATGCAGCTGTGGGAAGGAGCCTCTCCCTCCACCCCAGCCTCTCCCCTACAACCCAGGGGTGTCTAG	GCTCCAGGTCCTCACCCTGAGAAACTTCAGCTTCCCGATATCCGACGGTAGTGTNNNNNTATGGCCTGCTTCAGC	32006849	32007632	-	0	1
INF1_smMIP_CYP21A2_43	6:32007505-32007656/21,19/-	0.881099	6	32007636	32007656	ACTGGCTGTGGGCCGAGGGGA	2	32007505	32007523	GCGGCAGGAAGCATGAGAA	2	32007524	32007635	GGCCGTCCACGTACAGTCCCCACCTTGTGCTGCCTCAGCTGCATCTCCACGATGTGATCCCTCTTCTCTATGGCCTGCTTCAGCCTCCGGAGACCTGGATTGGGGAAGAACT	GCGGCAGGAAGCATGAGAACTTCAGCTTCCCGATATCCGACGGTAGTGTNNNNNACTGGCTGTGGGCCGAGGGGA	32006849	32007632	-	0	20
INF1_smMIP_CYP21A2_44	6:32007550-32007701/16,24/+	0.89048	6	32007550	32007565	AGGCTGAAGCAGGCCA	11	32007678	32007701	GCTATGAGGCGGGTTCTTTTGCAT	2	32007566	32007677	TAGAGAAGAGGGATCACATCGTGGAGATGCAGCTGAGGCAGCACAAGGTGGGGACTGTACGTGGACGGCCTCCCCTCGGCCCACAGCCAGTGATGCTACCGGCCTCAGCATT	GCTATGAGGCGGGTTCTTTTGCATCTTCAGCTTCCCGATATCCGACGGTAGTGTNNNNNAGGCTGAAGCAGGCCA	32006849	32007632	+	0	10
INF1_smMIP_CYP21A2_45	6:32007658-32007809/16,24/-	0.758827	6	32007794	32007809	CCCTCCACTGGCCTGC	6	32007658	32007681	TAGCAATGCTGAGGCCGGTAGCAT	2	32007682	32007793	CACGAGGCTCTCCTGCAGAGGGTGAAAGGAGCGGGCTGAGCGGCTGGCCTGGGGAGAGGAGTACAGAGTGGCAACAGGCCCATAACTGGGGTATGCAAAAGAACCCGCCTCA	TAGCAATGCTGAGGCCGGTAGCATCTTCAGCTTCCCGATATCCGACGGTAGTGTNNNNNCCCTCCACTGGCCTGC	32007760	32008002	-	0	20
INF1_smMIP_CYP21A2_46	6:32007756-32007907/16,24/-	0.854858	6	32007892	32007907	GTCCACTGCAGCCATG	7	32007756	32007779	GCAGAGGGTGAAAGGAGCGGGCTG	2	32007780	32007891	TGCACGTGCCCTTCCAGGAGCTGTCCAGAGCCCTCTTCCATGCTCGGCTGCGCCACCCCTTGGAGCATGTAGTCCATCATGTCCCTCCACTGGCCTGCCACGAGGCTCTCCT	GCAGAGGGTGAAAGGAGCGGGCTGCTTCAGCTTCCCGATATCCGACGGTAGTGTNNNNNGTCCACTGCAGCCATG	32007760	32008002	-	0	1
INF1_smMIP_CYP21A2_47	6:32007852-32008003/16,24/+	0.847906	6	32007852	32007867	TGGAAGAGGGCTCTGG	6	32007980	32008003	GAGGTGCGTCCTGGGGACAAGCAA	1	32007868	32007979	ACAGCTCCTGGAAGGGCACGTGCACATGGCTGCAGTGGACCTCCTGATCGGTGGCACTGAGACCACAGCAAACACCCTCTCCTGGGCCGTGGTTTTTTTGCTTCACCACCCT	GAGGTGCGTCCTGGGGACAAGCAACTTCAGCTTCCCGATATCCGACGGTAGTGTNNNNNTGGAAGAGGGCTCTGG	32007760	32008002	+	0	20
INF1_smMIP_CYP21A2_48	6:32007923-32008074/16,24/-	0.88558	6	32008059	32008074	CCCAGCCGCACAGTGC	2	32007923	32007946	GAGGGTGTTTGCTGTGGTCTCAGT	2	32007947	32008058	TCAGAGCTGAGTGAGGGTGCCCACCGCCCTGGCCAGGTTGCTGGGAAGGAGCCTTTTGCTTGTCCCCAGGACGCACCTCAGGGTGGTGAAGCAAAAAAACCACGGCCCAGGA	GAGGGTGTTTGCTGTGGTCTCAGTCTTCAGCTTCCCGATATCCGACGGTAGTGTNNNNNCCCAGCCGCACAGTGC	32007760	32008002	-	0	1
INF1_smMIP_CYP21A2_49	6:32008069-32008220/16,24/+	0.887801	6	32008069	32008084	GCTGGGGCTGTGCTTG	12	32008197	32008220	GCAGGAGGAGCTAGACCACGAACT	1	32008085	32008196	CCTCACCGGCACTCAGGCTCACTGGGTTGCTGAGGGAGCGGCTGGAGGCTGGGCAGCTGTGGGCTGCTGGGGCAGGACTCCACCCGATCATTCCCCAGATTCAGCAGCGACT	GCAGGAGGAGCTAGACCACGAACTCTTCAGCTTCCCGATATCCGACGGTAGTGTNNNNNGCTGGGGCTGTGCTTG	32008161	32008931	+	0	10
INF1_smMIP_CYP21A2_50	6:32008169-32008320/19,21/-	0.522578	6	32008302	32008320	AACGGGCCGCAGGCGCAGC	1	32008169	32008189	GCTGAATCTGGGGAATGATCG	2	32008190	32008301	ACCTCGGCGATGGTGGCATTGAGCAAGGGCAGCCGTGCACGGTCCTTGTAGGGGACCCGGGAGCTGGAGGCACCAGGGCCCAGTTCGTGGTCTAGCTCCTCCTGCAGTCGCT	GCTGAATCTGGGGAATGATCGCTTCAGCTTCCCGATATCCGACGGTAGTGTNNNNNAACGGGCCGCAGGCGCAGC	32008161	32008931	-	0	1
INF1_smMIP_CYP21A2_51	6:32008279-32008430/22,18/-	0.541444	6	32008409	32008430	AGTTAGAGGCTGGCCAGGACCT	2	32008279	32008296	GGCGATGGTGGCATTGAG	2	32008297	32008408	CCCTGGGCTCGGGCTTTCCTCACTCATCCCCAACCCTCGGGAGTCACCTGCTGGGCCGTGTGGTGCGGTGGGGCAAGGCTAAGGGCACAACGGGCCGCAGGCGCAGCACCTC	GGCGATGGTGGCATTGAGCTTCAGCTTCCCGATATCCGACGGTAGTGTNNNNNAGTTAGAGGCTGGCCAGGACCT	32008161	32008931	-	0	1
INF1_smMIP_CYP21A2_52	6:32008365-32008516/16,24/-	0.813544	6	32008501	32008516	GTCTCATCCAGGTGGG	2	32008365	32008388	CACTCATCCCCAACCCTCGGGAGT	2	32008389	32008500	CGCCTTGGAGGTTCGGAATGATGACTGTGCCCTCAGGGATGTCGTAGCCGGAGATGCTGAAGGGGGCTGGAGTTAGAGGCTGGCCAGGACCTCCCTGGGCTCGGGCTTTCCT	CACTCATCCCCAACCCTCGGGAGTCTTCAGCTTCCCGATATCCGACGGTAGTGTNNNNNGTCTCATCCAGGTGGG	32008161	32008931	-	0	1
INF1_smMIP_CYP21A2_53	6:32008435-32008586/16,24/-	0.757119	6	32008571	32008586	ACCACATTTTCACGGC	1	32008435	32008458	CGTAGCCGGAGATGCTGAAGGGGG	2	32008459	32008570	AGGCCCCCGGCCCCCCACATACCAGGCCAGAACTCATGTGGCCTCTCCCAGACCGTCTCATCCAGGTGGGCGCCTTGGAGGTTCGGAATGATGACTGTGCCCTCAGGGATGT	CGTAGCCGGAGATGCTGAAGGGGGCTTCAGCTTCCCGATATCCGACGGTAGTGTNNNNNACCACATTTTCACGGC	32008161	32008931	-	0	20
INF1_smMIP_CYP21A2_54	6:32008545-32008696/19,21/-	0.600163	6	32008678	32008696	CGCAGCCGAAGGCCAGAGC	2	32008545	32008565	CCCGGCCCCCCACATACCAGG	2	32008566	32008677	TCTGGAGTTCTTGCCTGGCTCCAGGAAGCGATCTGCGGGCGGGTGGACAGGTGGGTGGGGAGGCGTTCAGCGGCAGCGGGGACCAGCCTCCACCACATTTTCACGGCAGGCC	CCCGGCCCCCCACATACCAGGCTTCAGCTTCCCGATATCCGACGGTAGTGTNNNNNCGCAGCCGAAGGCCAGAGC	32008161	32008931	-	0	20
INF1_smMIP_CYP21A2_55	6:32008631-32008782/22,18/+	0.356165	6	32008631	32008652	TCCACCCGCCCGCAGATCGCTT	2	32008765	32008782	CAGGCCTTCACGCTGCTG	2	32008653	32008764	CCTGGAGCCAGGCAAGAACTCCAGAGCTCTGGCCTTCGGCTGCGGTGCCCGCGTGTGCCTGGGCGAGCCGCTGGCGCGCCTGGAGCTCTTCGTGGTGCTGACCCGACTGCTG	CAGGCCTTCACGCTGCTGCTTCAGCTTCCCGATATCCGACGGTAGTGTNNNNNTCCACCCGCCCGCAGATCGCTT	32008161	32008931	+	0	20
INF1_smMIP_CYP21A2_56	6:32008732-32008883/21,19/-	0.257999	6	32008863	32008883	CCCATCCCCCGGGGCTGCAGC	2	32008732	32008750	GCACCACGAAGAGCTCCAG	2	32008751	32008862	CGCACTTGGAAAGGCTGCATCTTGAGGATGACACTGCAGTGGGGCAGGGGCTGCAGGGAGGGCAGGGCGTCCCCGGAGGGCAGCAGCGTGAAGGCCTGCAGCAGTCGGGTCA	GCACCACGAAGAGCTCCAGCTTCAGCTTCCCGATATCCGACGGTAGTGTNNNNNCCCATCCCCCGGGGCTGCAGC	32008161	32008931	-	0	20
INF1_smMIP_CYP21A2_57	6:32008796-32008947/17,23/-	0.769435	6	32008931	32008947	AAACTGAGGTACCCGGC	3	32008796	32008818	CAGGGGCTGCAGGGAGGGCAGGG	2	32008819	32008930	TGGCATCGGTCCTGCCCCATCACTGGCTCTGGCCCGGGCTGTGGGCCCCCATCCCCCGGGGCTGCAGCCGCACTTGGAAAGGCTGCATCTTGAGGATGACACTGCAGTGGGG	CAGGGGCTGCAGGGAGGGCAGGGCTTCAGCTTCCCGATATCCGACGGTAGTGTNNNNNAAACTGAGGTACCCGGC	32008161	32008931	-	0	1
INF1_smMIP_CYP21A2_58	6:32008901-32009052/20,20/-	0.841693	6	32009033	32009052	GTCCTTCACCACCCAGCCGC	2	32008901	32008920	CCTGCCCCATCACTGGCTCT	1	32008921	32009032	TGGAGGAAGCCTTCTCTGCCAGCGATCTCGCAGCACTGTGTTTACAGGGGGGAGGGGAGGGGTTCGTACGGGAGCAATAAAGGAGAAACTGAGGTACCCGGCTGGCATCGGT	CCTGCCCCATCACTGGCTCTCTTCAGCTTCCCGATATCCGACGGTAGTGTNNNNNGTCCTTCACCACCCAGCCGC	32008161	32008931	-	0	1
INF1_smMIP_CFTR_1	7:117120009-117120160/19,21/-	0.875571	7	117120142	117120160	CGACCTCTGCATGGTCTCT	1	117120009	117120029	TTTGCTTCCAATTCCCCCCAC	1	117120030	117120141	CGGGCGCTGGGGTCCCTGCTAGGGCCGTCTGGGCTCAAGCTCCTAATGCCAAAGACCTACTACTCTGGGTGCCTGCCGCTCAACCCTTTTTCTCTGACCTGCTGTGATGTCA	TTTGCTTCCAATTCCCCCCACCTTCAGCTTCCCGATATCCGACGGTAGTGTNNNNNCGACCTCTGCATGGTCTCT	117120127	117120221	-	0	20
INF1_smMIP_CFTR_2	7:117120121-117120272/16,24/+	0.904012	7	117120121	117120136	TAGCAGGGACCCCAGC	1	117120249	117120272	GAGGAGGGCGTGTGTATGGGTTGG	1	117120137	117120248	GCCCGAGAGACCATGCAGAGGTCGCCTCTGGAAAAGGCCAGCGTTGTCTCCAAACTTTTTTTCAGGTGAGAAGGTGGCCAACCGAGCTTCGGAAAGACACGTGCCCACGAAA	GAGGAGGGCGTGTGTATGGGTTGGCTTCAGCTTCCCGATATCCGACGGTAGTGTNNNNNTAGCAGGGACCCCAGC	117120127	117120221	+	0	1
INF1_smMIP_CFTR_3	7:117144241-117144392/19,21/-	0.872393	7	117144374	117144392	CAGCAGAATCAACAGAAGG	1	117144241	117144261	CATACAGATTTGGAATCTGAT	1	117144262	117144373	GATTTGGTATATGTCTGACAATTCCAGGCGCTGTCTGTATCCTTTCCTCAAAATTGGTCTGGTCCAGCTAAAATAAAGAGAGGAGGAACAGATATTCACTTGATTTGGTCTC	CATACAGATTTGGAATCTGATCTTCAGCTTCCCGATATCCGACGGTAGTGTNNNNNCAGCAGAATCAACAGAAGG	117144285	117144437	-	0	1
INF1_smMIP_CFTR_4	7:117144341-117144492/19,21/-	0.770203	7	117144474	117144492	ATGTTTGCTTTCTCTTCTC	1	117144341	117144361	GTCTGACAATTCCAGGCGCTG	1	117144362	117144473	TAAATAATTAATAATATGAATTTCTCTCTTCAACTAAACAATGTACATGAACATACCTTTCCAATTTTTCAGATAGATTGTCAGCAGAATCAACAGAAGGGATTTGGTATAT	GTCTGACAATTCCAGGCGCTGCTTCAGCTTCCCGATATCCGACGGTAGTGTNNNNNATGTTTGCTTTCTCTTCTC	117144285	117144437	-	0	1
INF1_smMIP_CFTR_5	7:117148973-117149124/16,24/+	0.836768	7	117148973	117148988	ACTTGGGTTAATCTCC	1	117149101	117149124	GAGCTGGCTTCAAAGAAAAATCCT	1	117148989	117149100	TTGGATATACTTGTGTGAATCAAACTATGTTAAGGGAAATAGGACAACTAAAATATTTGCACATGCAACTTATTGGTCCCACTTTTTATTCTTTTGCAGAGAATGGGATAGA	GAGCTGGCTTCAAAGAAAAATCCTCTTCAGCTTCCCGATATCCGACGGTAGTGTNNNNNACTTGGGTTAATCTCC	117149066	117149216	+	0	1
INF1_smMIP_CFTR_6	7:117149066-117149217/21,19/-	0.561917	7	117149197	117149217	ATGTACAAATGAGATCCTTAC	1	117149066	117149084	CAAAAGAATAAAAAGTGGG	1	117149085	117149196	CCCTAAATATAAAAAGATTCCATAGAACATAAATCTCCAGAAAAAACATCGCCGAAGGGCATTAATGAGTTTAGGATTTTTCTTTGAAGCCAGCTCTCTATCCCATTCTCTG	CAAAAGAATAAAAAGTGGGCTTCAGCTTCCCGATATCCGACGGTAGTGTNNNNNATGTACAAATGAGATCCTTAC	117149066	117149216	-	0	1
INF1_smMIP_CFTR_7	7:117149173-117149324/16,24/-	0.65287	7	117149309	117149324	TTAGTGTTTGGAGTTG	5	117149173	117149196	CCCTAAATATAAAAAGATTCCATA	1	117149197	117149308	GATTCATCCTTTATATTTTTACACCTATTCACCAGATTTCGTAGTCTTTTCATAATCACAAAAATGAATATAGTTATGTGATACATAATGAATGTACAAATGAGATCCTTAC	CCCTAAATATAAAAAGATTCCATACTTCAGCTTCCCGATATCCGACGGTAGTGTNNNNNTTAGTGTTTGGAGTTG	117149066	117149216	-	0	1
INF1_smMIP_CFTR_8	7:117170881-117171032/20,20/-	0.900068	7	117171013	117171032	GAGCGTTCCTCCTTGTTATC	1	117170881	117170900	ACCCTGAGAATTTCAACACA	1	117170901	117171012	CGGGTCATAGGAAGCTATGATTCTTCCCAGTAAGAGAGGCTGTACTGCTTTGGTGACTTCCTACAAAAGGGGAAAAACAGAGAAATTAAATTTCATTTATTTCTCATAAAAT	ACCCTGAGAATTTCAACACACTTCAGCTTCCCGATATCCGACGGTAGTGTNNNNNGAGCGTTCCTCCTTGTTATC	117170931	117171188	-	0	1
INF1_smMIP_CFTR_9	7:117170964-117171115/16,24/-	0.900831	7	117171100	117171115	GAAGGCCAAAAATGGC	2	117170964	117170987	CCCAGTAAGAGAGGCTGTACTGCT	1	117170988	117171099	TGGGTGTAGGAGCAGTGTCCTCACAATAAAGAGAAGGCATAAGCCTATGCCTAGATAAATCGCGATAGAGCGTTCCTCCTTGTTATCCGGGTCATAGGAAGCTATGATTCTT	CCCAGTAAGAGAGGCTGTACTGCTCTTCAGCTTCCCGATATCCGACGGTAGTGTNNNNNGAAGGCCAAAAATGGC	117170931	117171188	-	0	1
INF1_smMIP_CFTR_10	7:117171061-117171212/16,24/+	0.89233	7	117171061	117171076	TGCCTTCTCTTTATTG	9	117171189	117171212	CCCCATGGCACATATATTCTGTAT	1	117171077	117171188	TGAGGACACTGCTCCTACACCCAGCCATTTTTGGCCTTCATCACATTGGAATGCAGATGAGAATAGCTATGTTTAGTTTGATTTATAAGAAGGTAATACTTCCTTGCACAGG	CCCCATGGCACATATATTCTGTATCTTCAGCTTCCCGATATCCGACGGTAGTGTNNNNNTGCCTTCTCTTTATTG	117170931	117171188	+	0	1
INF1_smMIP_CFTR_11	7:117171100-117171251/16,24/+	0.896002	7	117171100	117171115	GCCATTTTTGGCCTTC	2	117171228	117171251	GTCATAAATTAGGTAGTGAGCTGG	1	117171116	117171227	ATCACATTGGAATGCAGATGAGAATAGCTATGTTTAGTTTGATTTATAAGAAGGTAATACTTCCTTGCACAGGCCCCATGGCACATATATTCTGTATCGTACATGTTTTAAT	GTCATAAATTAGGTAGTGAGCTGGCTTCAGCTTCCCGATATCCGACGGTAGTGTNNNNNGCCATTTTTGGCCTTC	117170931	117171188	+	0	1
INF1_smMIP_CFTR_12	7:117174233-117174384/18,22/-	0.337247	7	117174367	117174384	TAACAAGTTGTCCAATAC	1	117174233	117174254	CTAATTCAGTTATTATGCATTC	1	117174255	117174366	TTATTTTATCTAGAACACGGCTTGACAGCTTTAAAGTCTAAAAGAAAAATGGAAAGTTAGATAATTTCAACAAACAAAATACAAATATATTATAAGTAAAATTATAATATGA	CTAATTCAGTTATTATGCATTCCTTCAGCTTCCCGATATCCGACGGTAGTGTNNNNNTAACAAGTTGTCCAATAC	117174308	117174439	-	0	10
INF1_smMIP_CFTR_13	7:117174327-117174478/16,24/-	0.87938	7	117174463	117174478	TTTCCAGTTGTATAAT	10	117174327	117174350	ACGGCTTGACAGCTTTAAAGTCTA	1	117174351	117174462	TTATAACAATAGTGCCTAAAAGATTAAATCAATAGGTACATACTTCATCAAATTTGTTCAGGTTGTTGGAAAGGAGACTAACAAGTTGTCCAATACTTATTTTATCTAGAAC	ACGGCTTGACAGCTTTAAAGTCTACTTCAGCTTCCCGATATCCGACGGTAGTGTNNNNNTTTCCAGTTGTATAAT	117174308	117174439	-	0	1
INF1_smMIP_CFTR_14	7:117175255-117175406/17,23/-	0.9049	7	117175390	117175406	ACCAAGTCCACAGAAGG	2	117175255	117175277	ACAGGTGTCATTGTATCTTCCAC	1	117175278	117175389	CAGACGCCTGTAACAACTCCCAGATTAGCCCCATGAGGAGTGCCACTTGCAAAGGAGCGATCCACACGAAATGTGCCAATGCAAGTCCCTGGAAAATAAAAGCACAGCAAAA	ACAGGTGTCATTGTATCTTCCACCTTCAGCTTCCCGATATCCGACGGTAGTGTNNNNNACCAAGTCCACAGAAGG	117175280	117175485	-	0	1
INF1_smMIP_CFTR_15	7:117175373-117175524/17,23/+	0.723315	7	117175373	117175389	GTTGTTACAGGCGTCTG	1	117175502	117175524	ATTATGTTTTCAAAAAGCCCACT	1	117175390	117175501	CCTTCTGTGGACTTGGTTTCCTGATAGTCCTTGCCCTTTTTCAGGCTGGGCTAGGGAGAATGATGATGAAGTACAGGTAGCAACCTATTTTCATAACTTGAAAGTTTTAAAA	ATTATGTTTTCAAAAAGCCCACTCTTCAGCTTCCCGATATCCGACGGTAGTGTNNNNNGTTGTTACAGGCGTCTG	117175280	117175485	+	0	1
INF1_smMIP_CFTR_15b	7:117175373-117175524/17,23/+	0.723315	7	117175373	117175389	GTTGTTACAGGCGTCTG	1	117175502	117175524	ATTGTGTTTTCAAAAAGCCCACT	1	117175390	117175501	CCTTCTGTGGACTTGGTTTCCTGATAGTCCTTGCCCTTTTTCAGGCTGGGCTAGGGAGAATGATGATGAAGTACAGGTAGCAACCTATTTTCATAACTTGAAAGTTTTAAAA	ATTGTGTTTTCAAAAAGCCCACTCTTCAGCTTCCCGATATCCGACGGTAGTGTNNNNNGTTGTTACAGGCGTCTG	117175280	117175485	+	0	1
INF1_smMIP_CFTR_16	7:117176549-117176700/19,21/-	0.699182	7	117176682	117176700	ATTGCTTCTTCCCAGCAGT	1	117176549	117176569	CTAATAGTAAAAACAAGTCAA	1	117176570	117176681	ATGCCTTAACAGATTGGATATTTTCAATCATTTCTGAGGTAATCACAAGTCTTTCACTGATCTTCCCAGCTCTCTGATCTCTGTAAATCAATCAATCAATCAATCAATCAAT	CTAATAGTAAAAACAAGTCAACTTCAGCTTCCCGATATCCGACGGTAGTGTNNNNNATTGCTTCTTCCCAGCAGT	117176580	117176747	-	0	20
INF1_smMIP_CFTR_17	7:117176657-117176808/16,24/-	0.791508	7	117176793	117176808	GGAAGTCTACCATGAT	1	117176657	117176680	TGCCTTAACAGATTGGATATTTTC	1	117176681	117176792	AAACATATTTTTAAAAAATTAAGGACAGAATTACTAACAATATTGAAATTATTGGAACAACTTACTGTCTTAAGTTTTCAATCATTTTTTCCATTGCTTCTTCCCAGCAGTA	TGCCTTAACAGATTGGATATTTTCCTTCAGCTTCCCGATATCCGACGGTAGTGTNNNNNGGAAGTCTACCATGAT	117176580	117176747	-	0	1
INF1_smMIP_CFTR_18	7:117180094-117180245/22,18/-	0.915256	7	117180224	117180245	ATAAAAACACCACAAAGAACCC	1	117180094	117180111	TTTTCAAATATCAGGGAT	2	117180112	117180223	TGAGAAGAAGAAGGCTGAGCTATTGAAGTATCTCACATAGGCTGCCTTCCGAGTCAGTTTCAGTTCTGTTCTATAAAAAACAATAACAATAAAATTCAGGATGTTATTTTAT	TTTTCAAATATCAGGGATCTTCAGCTTCCCGATATCCGACGGTAGTGTNNNNNATAAAAACACCACAAAGAACCC	117180132	117180420	-	0	1
INF1_smMIP_CFTR_19	7:117180183-117180334/22,18/+	0.915588	7	117180183	117180204	CCTATGTGAGATACTTCAATAG	1	117180317	117180334	GTTCTGCGCATGGCGGTC	1	117180205	117180316	CTCAGCCTTCTTCTTCTCAGGGTTCTTTGTGGTGTTTTTATCTGTGCTTCCCTATGCACTAATCAAAGGAATCATCCTCCGGAAAATATTCACCACCATCTCATTCTGCATT	GTTCTGCGCATGGCGGTCCTTCAGCTTCCCGATATCCGACGGTAGTGTNNNNNCCTATGTGAGATACTTCAATAG	117180132	117180420	+	0	5
INF1_smMIP_CFTR_20b	7:117180298-117180449/16,24/+	0.347843	7	117180298	117180313	CACCATCTCATTCTGC	3	117180426	117180449	ATACCATGATTTAAATAATCAGTC	1	117180314	117180425	ATTGTTCTGCGCATGGCGGTCACTCGGCAATTTCCCTGGGCTGTACAAACATGGTATGACTCTCTTGGAGCAATAAACAAAATACAGGTAATGTACCATAATGCTGCATTAT	ATACCATGATTTAAATAATCAGTCCTTCAGCTTCCCGATATCCGACGGTAGTGTNNNNNCACCATCTCATTCTGC	117180132	117180420	+	0	20
INF1_smMIP_CFTR_20	7:117180298-117180449/16,24/+	0.347843	7	117180298	117180313	CACCATCTCATTCTGC	3	117180426	117180449	ATACTATGATTTAAATAATCAGTC	1	117180314	117180425	ATTGTTCTGCGCATGGCGGTCACTCGGCAATTTCCCTGGGCTGTACAAACATGGTATGACTCTCTTGGAGCAATAAACAAAATACAGGTAATGTACCATAATGCTGCATTAT	ATACTATGATTTAAATAATCAGTCCTTCAGCTTCCCGATATCCGACGGTAGTGTNNNNNCACCATCTCATTCTGC	117180132	117180420	+	0	20
INF1_smMIP_CFTR_21	7:117182015-117182166/19,21/-	0.896087	7	117182148	117182166	TGACCTCCTCCCAGAAGGC	1	117182015	117182035	ATCAGAATAGCATTAATGCAT	1	117182036	117182147	TGTTACATTCTCCATCACTACTTCTGTAGTCGTTAAGTTATATTCCAATGTCTTATATTCTTGCTTTTGTAAGAAATCCTATTTATAAAAGAGAGCAAAAACATATTATAGA	ATCAGAATAGCATTAATGCATCTTCAGCTTCCCGATATCCGACGGTAGTGTNNNNNTGACCTCCTCCCAGAAGGC	117182048	117182182	-	0	1
INF1_smMIP_CFTR_22	7:117182124-117182275/16,24/-	0.837798	7	117182260	117182275	TTCTACCAGTTATATC	3	117182124	117182147	TGTTACATTCTCCATCACTACTTC	1	117182148	117182259	ATCATTCTAATTTTATTCGCCATTAGGATGAAATCCATATTCACAAAGAAGAAAACAGTTAGGTGTTTAGAGCAAACAATTTTTTAAAAATTCTGACCTCCTCCCAGAAGGC	TGTTACATTCTCCATCACTACTTCCTTCAGCTTCCCGATATCCGACGGTAGTGTNNNNNTTCTACCAGTTATATC	117182048	117182182	-	0	1
INF1_smMIP_CFTR_23	7:117188629-117188780/16,24/-	0.790131	7	117188765	117188780	TTACTGAAGAAGAGGC	5	117188629	117188652	AAAAGATGAGTTTGTCAGATATTT	1	117188653	117188764	TGTCATCACCATTAGAAGTTTTTCTATTGTTATTGTTTTGTTTTGCTTTCTCAAATAATTCCCCAAATCCCTGTTAAAAAAACACACACACACACACACACACATCAAAAAT	AAAAGATGAGTTTGTCAGATATTTCTTCAGCTTCCCGATATCCGACGGTAGTGTNNNNNTTACTGAAGAAGAGGC	117188673	117188897	-	0	1
INF1_smMIP_CFTR_24	7:117188740-117188891/17,23/+	0.91872	7	117188740	117188756	AGAAAAACTTCTAATGG	5	117188869	117188891	GCAGGCAAGGTAGTTCTTTTGTT	1	117188757	117188868	TGATGACAGCCTCTTCTTCAGTAATTTCTCACTTCTTGGTACTCCTGTCCTGAAAGATATTAATTTCAAGATAGAAAGAGGACAGTTGTTGGCGGTTGCTGGATCCACTGGA	GCAGGCAAGGTAGTTCTTTTGTTCTTCAGCTTCCCGATATCCGACGGTAGTGTNNNNNAGAAAAACTTCTAATGG	117188673	117188897	+	0	1
INF1_smMIP_CFTR_25	7:117188785-117188936/22,18/-	0.91648	7	117188915	117188936	AAAAAAAAGAGACATGGACACC	1	117188785	117188802	AGGAGTACCAAGAAGTGA	4	117188803	117188914	AAATTAAGTTCTTAATAGTGAAGAACAAAAGAACTACCTTGCCTGCTCCAGTGGATCCAGCAACCGCCAACAACTGTCCTCTTTCTATCTTGAAATTAATATCTTTCAGGAC	AGGAGTACCAAGAAGTGACTTCAGCTTCCCGATATCCGACGGTAGTGTNNNNNAAAAAAAAGAGACATGGACACC	117188673	117188897	-	0	1
INF1_smMIP_CFTR_26	7:117199478-117199629/22,18/-	0.857147	7	117199608	117199629	TGGTGCCAGGCATAATCCAGGA	1	117199478	117199495	TTAGGTCATTATCAAATC	1	117199496	117199607	AAACTGAGAACAGAATGAAATTCTTCCACTGTGCTTAATTTTACCCTCTGAAGGCTCCAGTTCTCCCATAATCACCATTAGAAGTGAAGTCTGGAAATAAAACCCATCATTA	TTAGGTCATTATCAAATCCTTCAGCTTCCCGATATCCGACGGTAGTGTNNNNNTGGTGCCAGGCATAATCCAGGA	117199496	117199729	-	0	20
INF1_smMIP_CFTR_27	7:117199553-117199704/17,23/-	0.906154	7	117199688	117199704	CTAGTTGGCATGCTTTG	1	117199553	117199575	GCTTAATTTTACCCTCTGAAGGC	1	117199576	117199687	ATGACGCTTCTGTATCTATATTCATCATAGGAAACACCAAAGATGATATTTTCTTTAATGGTGCCAGGCATAATCCAGGAAAACTGAGAACAGAATGAAATTCTTCCACTGT	GCTTAATTTTACCCTCTGAAGGCCTTCAGCTTCCCGATATCCGACGGTAGTGTNNNNNCTAGTTGGCATGCTTTG	117199496	117199729	-	0	1
INF1_smMIP_CFTR_28	7:117199606-117199757/19,21/+	0.887286	7	117199606	117199624	TTTCCTGGATTATGCCTGG	1	117199737	117199757	TTATGCATATGAACCCTTCAC	1	117199625	117199736	CACCATTAAAGAAAATATCATCTTTGGTGTTTCCTATGATGAATATAGATACAGAAGCGTCATCAAAGCATGCCAACTAGAAGAGGTAAGAAACTATGTGAAAACTTTTTGA	TTATGCATATGAACCCTTCACCTTCAGCTTCCCGATATCCGACGGTAGTGTNNNNNTTTCCTGGATTATGCCTGG	117199496	117199729	+	0	1
INF1_smMIP_CFTR_29	7:117227721-117227872/22,18/+	0.867639	7	117227721	117227742	GGAAGATGTGCCTTTCAAATTC	1	117227855	117227872	TGGAGGTCAACGAGCAAG	1	117227743	117227854	AGATTGAGCATACTAAAAGTGACTCTCTAATTTTCTATTTTTGGTAATAGGACATCTCCAAGTTTGCAGAGAAAGACAATATAGTTCTTGGAGAAGGTGGAATCACACTGAG	TGGAGGTCAACGAGCAAGCTTCAGCTTCCCGATATCCGACGGTAGTGTNNNNNGGAAGATGTGCCTTTCAAATTC	117227771	117227907	+	0	1
INF1_smMIP_CFTR_30	7:117227835-117227986/20,20/-	0.872362	7	117227967	117227986	CCAGAAACAGAATATAAAGC	1	117227835	117227854	CTCAGTGTGATTCCACCTTC	1	117227855	117227966	AATAGAGAAATGTCTGTAATTTTTTTACATGAATGACATTTACAGCAAATGCTTGCTAGACCAATAATTAGTTATTCACCTTGCTAAAGAAATTCTTGCTCGTTGACCTCCA	CTCAGTGTGATTCCACCTTCCTTCAGCTTCCCGATATCCGACGGTAGTGTNNNNNCCAGAAACAGAATATAAAGC	117227771	117227907	-	0	1
INF1_smMIP_CFTR_31	7:117230354-117230505/17,23/-	0.755235	7	117230489	117230505	CAAAGAACATACCTTTC	2	117230354	117230376	TCCTCTCTATTTCCTGGTCATCT	1	117230377	117230488	AAATATTTCTTTTTCTGTTAAAACATCTAGGTATCCAAAAGGAGAGTCTAATAAATACAAATCAGCATCTTTGTATACTGCTCTAAAAAGAAAATGGAAATTAAATTACATT	TCCTCTCTATTTCCTGGTCATCTCTTCAGCTTCCCGATATCCGACGGTAGTGTNNNNNCAAAGAACATACCTTTC	117230385	117230513	-	0	1
INF1_smMIP_CFTR_32	7:117230408-117230559/21,19/-	0.841368	7	117230539	117230559	ATGGGACAGTCTGTCTTTCTT	1	117230408	117230426	CAGCATCTTTGTATACTGC	1	117230427	117230538	TTATTTTAGCATGAGCATTATAAGTAAGGTATTCAAAGAACATACCTTTCAAATATTTCTTTTTCTGTTAAAACATCTAGGTATCCAAAAGGAGAGTCTAATAAATACAAAT	CAGCATCTTTGTATACTGCCTTCAGCTTCCCGATATCCGACGGTAGTGTNNNNNATGGGACAGTCTGTCTTTCTT	117230385	117230513	-	0	1
INF1_smMIP_CFTR_33	7:117231883-117232034/16,24/+	0.291105	7	117231883	117231898	GATAGAGATTATATGC	1	117232011	117232034	ACAAAACTAGGATTTTGGTCACTT	1	117231899	117232010	AATAAAACATTAACAAAATGCTAAAATACGAGACATATTGCAATAAAGTATTTATAAAATTGATATTTATATGTTTTTATATCTTAAAGCTGTGTCTGTAAACTGATGGCTA	ACAAAACTAGGATTTTGGTCACTTCTTCAGCTTCCCGATATCCGACGGTAGTGTNNNNNGATAGAGATTATATGC	117231966	117232731	+	0	1
INF1_smMIP_CFTR_34	7:117231987-117232138/22,18/+	0.924027	7	117231987	117232008	GCTGTGTCTGTAAACTGATGGC	1	117232121	117232138	CAAAATCTACAGCCAGAC	1	117232009	117232120	TAACAAAACTAGGATTTTGGTCACTTCTAAAATGGAACATTTAAAGAAAGCTGACAAAATATTAATTTTGCATGAAGGTAGCAGCTATTTTTATGGGACATTTTCAGAACTC	CAAAATCTACAGCCAGACCTTCAGCTTCCCGATATCCGACGGTAGTGTNNNNNGCTGTGTCTGTAAACTGATGGC	117231966	117232731	+	0	1
INF1_smMIP_CFTR_35	7:117232099-117232250/18,22/-	0.8961	7	117232233	117232250	CAGGAGCATCTCCTTCTA	1	117232099	117232120	GAGTTCTGAAAATGTCCCATAA	1	117232121	117232232	ATGAGAAACGGTGTAAGGTCTCAGTTAGGATTGAATTTCTTCTTTCTGCACTAAATTGGTCGAAAGAATCACATCCCATGAGTTTTGAGCTAAAGTCTGGCTGTAGATTTTG	GAGTTCTGAAAATGTCCCATAACTTCAGCTTCCCGATATCCGACGGTAGTGTNNNNNCAGGAGCATCTCCTTCTA	117231966	117232731	-	0	1
INF1_smMIP_CFTR_36	7:117232200-117232351/19,21/+	0.740357	7	117232200	117232218	CAATCCTAACTGAGACCTT	1	117232331	117232351	CCAATCAACTCTATACGAAAA	1	117232219	117232330	ACACCGTTTCTCATTAGAAGGAGATGCTCCTGTCTCCTGGACAGAAACAAAAAAACAATCTTTTAAACAGACTGGAGAGTTTGGGGAAAAAAGGAAGAATTCTATTCTCAAT	CCAATCAACTCTATACGAAAACTTCAGCTTCCCGATATCCGACGGTAGTGTNNNNNCAATCCTAACTGAGACCTT	117231966	117232731	+	0	1
INF1_smMIP_CFTR_37	7:117232299-117232450/18,22/+	0.906098	7	117232299	117232316	TTGGGGAAAAAAGGAAGA	2	117232429	117232450	GTCCTTAGTACCAGATTCTGAG	1	117232317	117232428	ATTCTATTCTCAATCCAATCAACTCTATACGAAAATTTTCCATTGTGCAAAAGACTCCCTTACAAATGAATGGCATCGAAGAGGATTCTGATGAGCCTTTAGAGAGAAGGCT	GTCCTTAGTACCAGATTCTGAGCTTCAGCTTCCCGATATCCGACGGTAGTGTNNNNNTTGGGGAAAAAAGGAAGA	117231966	117232731	+	0	1
INF1_smMIP_CFTR_38	7:117232372-117232523/16,24/-	0.892587	7	117232508	117232523	ACTGCCTCCTTCGTGC	1	117232372	117232395	TCGATGCCATTCATTTGTAAGGGA	1	117232396	117232507	CTGAAGCGTGGGGCCAGTGCTGATCACGCTGATGCGAGGCAGTATCGCCTCTCCCTGCTCAGAATCTGGTACTAAGGACAGCCTTCTCTCTAAAGGCTCATCAGAATCCTCT	TCGATGCCATTCATTTGTAAGGGACTTCAGCTTCCCGATATCCGACGGTAGTGTNNNNNACTGCCTCCTTCGTGC	117231966	117232731	-	0	1
INF1_smMIP_CFTR_39	7:117232438-117232589/17,23/-	0.886878	7	117232573	117232589	ATGCTGTTGTCTTTCGG	1	117232438	117232460	CCTCTCCCTGCTCAGAATCTGGT	1	117232461	117232572	TGAATGTTCTGACCTTGGTTAACTGAGTGTGTCATCAGGTTCAGGACAGACTGCCTCCTTCGTGCCTGAAGCGTGGGGCCAGTGCTGATCACGCTGATGCGAGGCAGTATCG	CCTCTCCCTGCTCAGAATCTGGTCTTCAGCTTCCCGATATCCGACGGTAGTGTNNNNNATGCTGTTGTCTTTCGG	117231966	117232731	-	0	1
INF1_smMIP_CFTR_40	7:117232525-117232676/16,24/+	0.900621	7	117232525	117232540	TGTCCTGAACCTGATG	3	117232653	117232676	GGTTATCTCAAGAAACTGGCTTGG	1	117232541	117232652	ACACACTCAGTTAACCAAGGTCAGAACATTCACCGAAAGACAACAGCATCCACACGAAAAGTGTCACTGGCCCCTCAGGCAAACTTGACTGAACTGGATATATATTCAAGAA	GGTTATCTCAAGAAACTGGCTTGGCTTCAGCTTCCCGATATCCGACGGTAGTGTNNNNNTGTCCTGAACCTGATG	117231966	117232731	+	0	1
INF1_smMIP_CFTR_41	7:117232599-117232750/19,21/-	0.944463	7	117232732	117232750	TTCTGTGGGGTGAAATACC	1	117232599	117232619	CCTGAGGGGCCAGTGACACTT	1	117232620	117232731	CCCAAGCGATGTATACCTACCTTTAAGTCTTCTTCGTTAATTTCTTCACTTATTTCCAAGCCAGTTTCTTGAGATAACCTTCTTGAATATATATCCAGTTCAGTCAAGTTTG	CCTGAGGGGCCAGTGACACTTCTTCAGCTTCCCGATATCCGACGGTAGTGTNNNNNTTCTGTGGGGTGAAATACC	117231966	117232731	-	0	1
INF1_smMIP_CFTR_42	7:117234920-117235071/16,24/-	0.855446	7	117235056	117235071	TTAAGCTCTTGTGGAC	1	117234920	117234943	GTTTCATGCCACCATTGTGGTTTT	1	117234944	117235055	AGTAATATATCGAAGGTATGTGTTCCATGTAGTCACTGCTGGTATGCTCTCCATATCATCAAAAAAGCACTCCTGAATAAAAGAATTATGGCTATTACAATAAGACAGTACA	GTTTCATGCCACCATTGTGGTTTTCTTCAGCTTCCCGATATCCGACGGTAGTGTNNNNNTTAAGCTCTTGTGGAC	117234962	117235132	-	0	1
INF1_smMIP_CFTR_43	7:117235028-117235179/19,21/-	0.727006	7	117235161	117235179	TATACATCCCCAAACTATC	1	117235028	117235048	TATCGAAGGTATGTGTTCCAT	1	117235049	117235160	TTAATTTAACTTTAAATCCAGTAATACTTTACAATAGAACATTCTTACCTCTGCCAGAAAAATTACTAAGCACCAAATTAGCACAAAAATTAAGCTCTTGTGGACAGTAATA	TATCGAAGGTATGTGTTCCATCTTCAGCTTCCCGATATCCGACGGTAGTGTNNNNNTATACATCCCCAAACTATC	117234962	117235132	-	0	1
INF1_smMIP_CFTR_44	7:117242804-117242955/17,23/-	0.917122	7	117242939	117242955	TAAAACACAATCTACAC	2	117242804	117242826	TCCCATGCCCACATCTAAATTCA	1	117242827	117242938	AATAGGACATGGAATACTCACTTTCCAAGGAGCCACAGCACAACCAAAGAAGCAGCCACCTGGAATGGAACAAGACACAGTTGATTTTTTTTCTAACATCTTCACCTATTCC	TCCCATGCCCACATCTAAATTCACTTCAGCTTCCCGATATCCGACGGTAGTGTNNNNNTAAAACACAATCTACAC	117242858	117242937	-	0	1
INF1_smMIP_CFTR_45	7:117243542-117243693/17,23/+	0.897193	7	117243542	117243558	AGTAACTTTGGCTGCCA	2	117243671	117243693	GTGTTTTACATTTACGTGGGAGT	1	117243559	117243670	AATAACGATTTCCTATTTGCTTTACAGCACTCCTCTTCAAGACAAAGGGAATAGTACTCATAGTAGAAATAACAGCTATGCAGTGATTATCACCAGCACCAGTTCGTATTAT	GTGTTTTACATTTACGTGGGAGTCTTCAGCTTCCCGATATCCGACGGTAGTGTNNNNNAGTAACTTTGGCTGCCA	117243564	117243856	+	0	1
INF1_smMIP_CFTR_46	7:117243620-117243771/16,24/-	0.77271	7	117243756	117243771	AAAATTTTCGACACTG	1	117243620	117243643	CACTGCATAGCTGTTATTTCTACT	1	117243644	117243755	TGATTAGAGTATGCACCAGTGGTAGACCTCTGAAGAATCCCATAGCAAGCAAAGTGTCGGCTACTCCCACGTAAATGTAAAACACATAATACGAACTGGTGCTGGTGATAAT	CACTGCATAGCTGTTATTTCTACTCTTCAGCTTCCCGATATCCGACGGTAGTGTNNNNNAAAATTTTCGACACTG	117243564	117243856	-	0	1
INF1_smMIP_CFTR_47	7:117243724-117243875/18,22/-	0.910823	7	117243858	117243875	GTGGATCAGCAGTTTCAT	1	117243724	117243745	ATGCACCAGTGGTAGACCTCTG	1	117243746	117243857	TTCTTAGACCTAGTAAAGTACCTGCTTTCAACGTGTTGAGGGTTGACATAGGTGCTTGAAGAACAGAATGTAACATTTTGTGGTGTAAAATTTTCGACACTGTGATTAGAGT	ATGCACCAGTGGTAGACCTCTGCTTCAGCTTCCCGATATCCGACGGTAGTGTNNNNNGTGGATCAGCAGTTTCAT	117243564	117243856	-	0	1
INF1_smMIP_CFTR_48	7:117246638-117246789/22,18/-	0.885149	7	117246768	117246789	GGTAAGAGGCAGAAGGTCATCC	1	117246638	117246655	AAGTTTGGATCACAGTAG	1	117246656	117246767	AAAATTGCTATATCTTTGGAGAATCTATTAAGAATCCCACCTATAATATACAAGATGACAAATTCCTCAAAAAACACTAATTTTTTAAAGATATATCAATATATTCAATACT	AAGTTTGGATCACAGTAGCTTCAGCTTCCCGATATCCGACGGTAGTGTNNNNNGGTAAGAGGCAGAAGGTCATCC	117246706	117246827	-	0	10
INF1_smMIP_CFTR_49	7:117246689-117246840/19,21/-	0.722665	7	117246822	117246840	CAGACATACTTAACGGTAC	1	117246689	117246709	CAAATTCCTCAAAAAACACTA	1	117246710	117246821	TTATTTTTACATACCTGGATGAAGTCAAATATGGTAAGAGGCAGAAGGTCATCCAAAATTGCTATATCTTTGGAGAATCTATTAAGAATCCCACCTATAATATACAAGATGA	CAAATTCCTCAAAAAACACTACTTCAGCTTCCCGATATCCGACGGTAGTGTNNNNNCAGACATACTTAACGGTAC	117246706	117246827	-	0	1
INF1_smMIP_CFTR_50	7:117246765-117246916/20,20/+	0.903259	7	117246765	117246784	TTTGGATGACCTTCTGCCTC	1	117246897	117246916	GATTGAGGGTTGAAGTCCTG	1	117246785	117246896	TTACCATATTTGACTTCATCCAGGTATGTAAAAATAAGTACCGTTAAGTATGTCTGTATTATTAAAAAAACAATAACAAAAGCAAATGTGATTTTGTTTTCATTTTTTATTT	GATTGAGGGTTGAAGTCCTGCTTCAGCTTCCCGATATCCGACGGTAGTGTNNNNNTTTGGATGACCTTCTGCCTC	117246706	117246827	+	0	1
INF1_smMIP_CFTR_51	7:117250510-117250661/22,18/+	0.930915	7	117250510	117250531	CACTTTGTCCACTTTGCAATGT	1	117250644	117250661	GCCAGTGATAGTGGCTTT	1	117250532	117250643	GAAAATGTTTACTCACCAACATGTTTTCTTTGATCTTACAGTTGTTATTAATTGTGATTGGAGCTATAGCAGTTGTCGCAGTTTTACAACCCTACATCTTTGTTGCAACAGT	GCCAGTGATAGTGGCTTTCTTCAGCTTCCCGATATCCGACGGTAGTGTNNNNNCACTTTGTCCACTTTGCAATGT	117250551	117250743	+	0	1
INF1_smMIP_CFTR_52	7:117250621-117250772/17,23/+	0.649387	7	117250621	117250637	CCCTACATCTTTGTTGC	1	117250750	117250772	TCTTGTAAAAAAGCTATAAGAGC	1	117250638	117250749	AACAGTGCCAGTGATAGTGGCTTTTATTATGTTGAGAGCATATTTCCTCCAAACCTCACAGCAACTCAAACAACTGGAATCTGAAGGTATGACAGTGAATGTGCGATACTCA	TCTTGTAAAAAAGCTATAAGAGCCTTCAGCTTCCCGATATCCGACGGTAGTGTNNNNNCCCTACATCTTTGTTGC	117250551	117250743	+	10	10
INF1_smMIP_CFTR_53	7:117250636-117250787/17,23/-	0.848524	7	117250771	117250787	AAAGAATCTCAAATAGC	6	117250636	117250658	GCCACTATCACTGGCACTGTTGC	1	117250659	117250770	TCTTATAGCTTTTTTACAAGATGAGTATCGCACATTCACTGTCATACCTTCAGATTCCAGTTGTTTGAGTTGCTGTGAGGTTTGGAGGAAATATGCTCTCAACATAATAAAA	GCCACTATCACTGGCACTGTTGCCTTCAGCTTCCCGATATCCGACGGTAGTGTNNNNNAAAGAATCTCAAATAGC	117250551	117250743	-	0	1
INF1_smMIP_CFTR_54	7:117251561-117251712/21,19/+	0.906762	7	117251561	117251581	CAGGTACAAGATATTATGAAA	1	117251694	117251712	GCCTTCGGACGGCAGCCTT	1	117251582	117251693	TTACATTTTGTGTTTATGTTATTTGCAATGTTTTCTATGGAAATATTTCACAGGCAGGAGTCCAATTTTCACTCATCTTGTTACAAGCTTAAAAGGACTATGGACACTTCGT	GCCTTCGGACGGCAGCCTTCTTCAGCTTCCCGATATCCGACGGTAGTGTNNNNNCAGGTACAAGATATTATGAAA	117251613	117251882	+	10	1
INF1_smMIP_CFTR_55b	7:117251637-117251788/21,19/-	0.911216	7	117251768	117251788	CAGCGCAGAGTTGACAGGTAC	1	117251637	117251655	GAGTGAAAATTGGACTCCT	1	117251656	117251767	AAGAACCAGTTGGCAGTATGTAAATTCAGAGCTTTGTGGAACAGAGTTTCAAAGTAAGGCTGCCGTCCGAAGGCACGAAGTGTCCATAGTCCTTTTAAGCTTGTAACAAGAT	GAGTGAAAATTGGACTCCTCTTCAGCTTCCCGATATCCGACGGTAGTGTNNNNNCAGCGCAGAGTTGACAGGTAC	117251613	117251882	-	0	1
INF1_smMIP_CFTR_55	7:117251637-117251788/21,19/-	0.911216	7	117251768	117251788	CAGCGCAGTGTTGACAGGTAC	1	117251637	117251655	GAGTGAAAATTGGACTCCT	1	117251656	117251767	AAGAACCAGTTGGCAGTATGTAAATTCAGAGCTTTGTGGAACAGAGTTTCAAAGTAAGGCTGCCGTCCGAAGGCACGAAGTGTCCATAGTCCTTTTAAGCTTGTAACAAGAT	GAGTGAAAATTGGACTCCTCTTCAGCTTCCCGATATCCGACGGTAGTGTNNNNNCAGCGCAGTGTTGACAGGTAC	117251613	117251882	-	0	1
INF1_smMIP_CFTR_56	7:117251680-117251831/16,24/-	0.865551	7	117251816	117251831	AATGAAGAAGATGACA	11	117251680	117251703	GTCCGAAGGCACGAAGTGTCCATA	1	117251704	117251815	AAAATCATTTCTATTCTCATTTGGAACCAGCGCAGTGTTGACAGGTACAAGAACCAGTTGGCAGTATGTAAATTCAGAGCTTTGTGGAACAGAGTTTCAAAGTAAGGCTGCC	GTCCGAAGGCACGAAGTGTCCATACTTCAGCTTCCCGATATCCGACGGTAGTGTNNNNNAATGAAGAAGATGACA	117251613	117251882	-	0	1
INF1_smMIP_CFTR_57	7:117251781-117251932/18,22/+	0.728234	7	117251781	117251798	CTGCGCTGGTTCCAAATG	1	117251911	117251932	CAATGAATAAAATGCTGCATTC	1	117251799	117251910	AGAATAGAAATGATTTTTGTCATCTTCTTCATTGCTGTTACCTTCATTTCCATTTTAACAACAGGTACTATGAACTCATTAACTTTAGCTAAGCATTTAAGTAAAAAATTTT	CAATGAATAAAATGCTGCATTCCTTCAGCTTCCCGATATCCGACGGTAGTGTNNNNNCTGCGCTGGTTCCAAATG	117251613	117251882	+	0	1
INF1_smMIP_CFTR_58	7:117254612-117254763/18,22/-	0.910555	7	117254746	117254763	CTATCCACATCTATGCTG	1	117254612	117254633	TGTTATTTCTCTCTTCTGTGAA	1	117254634	117254745	GAGTTTACAGCCCACTGCAATGTACTCATGATATTCATGGCTAAAGTCAGGATAATACCAACTCTTCCTTCTCCTTCTCCTATAGATGCACAAAAGACGTAAATGAACCTCA	TGTTATTTCTCTCTTCTGTGAACTTCAGCTTCCCGATATCCGACGGTAGTGTNNNNNCTATCCACATCTATGCTG	117254645	117254787	-	0	1
INF1_smMIP_CFTR_59	7:117254699-117254850/17,23/-	0.89713	7	117254834	117254850	ATAGTTCTTCCTCATGC	2	117254699	117254721	CTCATGATATTCATGGCTAAAGT	1	117254722	117254833	TATTACTCATACTTTGTTACTTGTCTGAATTTTTTTCATAAAAGTTAAAAAGATGATAAGACTTACCAAGCTATCCACATCTATGCTGGAGTTTACAGCCCACTGCAATGTA	CTCATGATATTCATGGCTAAAGTCTTCAGCTTCCCGATATCCGACGGTAGTGTNNNNNATAGTTCTTCCTCATGC	117254645	117254787	-	0	1
INF1_smMIP_CFTR_60	7:117267518-117267669/17,23/-	0.89537	7	117267653	117267669	AGAGTTGGCCATTCTTG	2	117267518	117267540	ATGGCAGACAATTTCACAATTAG	1	117267541	117267652	TATGGTTTGGTTGACTTGGTAGGTTTACCTTCTGTTGGCATGTCAATGAACTTAAAGACTCGGCTCACAGATCGCATCTGAAATAAAAATAACAACATTTTTGTTTTTAAGA	ATGGCAGACAATTTCACAATTAGCTTCAGCTTCCCGATATCCGACGGTAGTGTNNNNNAGAGTTGGCCATTCTTG	117267554	117267844	-	0	1
INF1_smMIP_CFTR_61	7:117267633-117267784/21,19/-	0.920305	7	117267764	117267784	ATGGCATTTCCACCTTCTGTG	1	117267633	117267651	ATGGTTTGGTTGACTTGGT	1	117267652	117267763	TATTTTGCTGTGAGATCTTTGACAGTCATTTGGCCCCCTGAGGGCCAGATGTCATCTTTCTTCACGTGTGAATTCTCAATAATCATAACTTTCGAGAGTTGGCCATTCTTGT	ATGGTTTGGTTGACTTGGTCTTCAGCTTCCCGATATCCGACGGTAGTGTNNNNNATGGCATTTCCACCTTCTGTG	117267554	117267844	-	0	1
INF1_smMIP_CFTR_62	7:117267712-117267863/19,21/-	0.915459	7	117267845	117267863	GAACACAGTCTAACAAAGC	1	117267712	117267732	GGCCCCCTGAGGGCCAGATGT	1	117267733	117267844	AAGCAGTGTTCAAATCTCACCCTCTGGCCAGGACTTATTGAGAAGGAAATGTTCTCTAATATGGCATTTCCACCTTCTGTGTATTTTGCTGTGAGATCTTTGACAGTCATTT	GGCCCCCTGAGGGCCAGATGTCTTCAGCTTCCCGATATCCGACGGTAGTGTNNNNNGAACACAGTCTAACAAAGC	117267554	117267844	-	0	1
INF1_smMIP_CFTR_63	7:117282429-117282580/17,23/-	0.924841	7	117282564	117282580	ATCTGGATTTCTCCTTC	2	117282429	117282451	GGTACCATGCCATAAACATAATT	1	117282452	117282563	AGTGTTCAGTAGTCTCAAAAAAGCTGATAACAAAGTACTCTTCCCTGATCCAGTTCTTCCCAAGAGGCCCACCTATAAGGTAAAAGTGATGGGATCACTTCTGTGACATATA	GGTACCATGCCATAAACATAATTCTTCAGCTTCCCGATATCCGACGGTAGTGTNNNNNATCTGGATTTCTCCTTC	117282470	117282667	-	0	1
INF1_smMIP_CFTR_64	7:117282529-117282680/16,24/-	0.797405	7	117282665	117282680	TTGCCTTTTTTCTGGC	5	117282529	117282552	GTCTCAAAAAAGCTGATAACAAAG	1	117282553	117282664	TAAGTCCTTTTGCTCACCTGTGGTATCACTCCAAAGGCTTTCCTCCACTGTTGCAAAGTTATTGAATCCCAAGACACACCATCGATCTGGATTTCTCCTTCAGTGTTCAGTA	GTCTCAAAAAAGCTGATAACAAAGCTTCAGCTTCCCGATATCCGACGGTAGTGTNNNNNTTGCCTTTTTTCTGGC	117282470	117282667	-	0	1
INF1_smMIP_CFTR_65	7:117282645-117282796/17,23/+	0.933803	7	117282645	117282661	CAGGTGAGCAAAAGGAC	1	117282774	117282796	CTCCAGTGCAGTTTTCTCATAGG	1	117282662	117282773	TTAGCCAGAAAAAAGGCAACTAAATTATATTTTTTACTGCTATTTGATACTTGTACTCAAGAAATTCATATTACTCTGCAAAATATATTTGTTATGCATTGCTGTCTTTTTT	CTCCAGTGCAGTTTTCTCATAGGCTTCAGCTTCCCGATATCCGACGGTAGTGTNNNNNCAGGTGAGCAAAAGGAC	117282470	117282667	+	0	1
INF1_smMIP_CFTR_66	7:117292813-117292964/16,24/-	0.607666	7	117292949	117292964	TTCTTGATCACTCCAC	1	117292813	117292836	CCCTTATTGTATTGTAAAATATTT	1	117292837	117292948	TGTTCATAGGGATCCAAGTTTTTTCTAAATGTTCCAGAAAAAATAAATACTTTCTATAGCAAAAAAGAAAAGAAGAAGAAAGTATGAATAACTTAAATAACTTTTTATTTTT	CCCTTATTGTATTGTAAAATATTTCTTCAGCTTCCCGATATCCGACGGTAGTGTNNNNNTTCTTGATCACTCCAC	117292874	117293005	-	0	1
INF1_smMIP_CFTR_67	7:117292922-117293073/16,24/-	0.874323	7	117293058	117293073	CAAAGTGTGTAGAATG	5	117292922	117292945	TCATAGGGATCCAAGTTTTTTCTA	1	117292946	117293057	ATGTCAGCTATATCAGCCATTTGTGTTGGTATGAGTTACCCCTTTCAAAATCATTTCAGTTAGCAGCCTTACCTCATCTGCAACTTTCCATATTTCTTGATCACTCCACTGT	TCATAGGGATCCAAGTTTTTTCTACTTCAGCTTCCCGATATCCGACGGTAGTGTNNNNNCAAAGTGTGTAGAATG	117292874	117293005	-	0	1
INF1_smMIP_CFTR_68	7:117304659-117304810/22,18/+	0.903679	7	117304659	117304680	GAACTCCTGTGTTTATTTTTAG	1	117304793	117304810	CTTGTGGATGGGGGCTGT	1	117304681	117304792	AATGTCAACTGCTTGAGTGTTTTTAACTCTGTGGTATCTGAACTATCTTCTCTAACTGCAGGTTGGGCTCAGATCTGTGATAGAACAGTTTCCTGGGAAGCTTGACTTTGTC	CTTGTGGATGGGGGCTGTCTTCAGCTTCCCGATATCCGACGGTAGTGTNNNNNGAACTCCTGTGTTTATTTTTAG	117304720	117304934	+	0	1
INF1_smMIP_CFTR_69	7:117304766-117304917/20,20/-	0.916934	7	117304898	117304917	CACACTGGATCCAAATGAGC	1	117304766	117304785	TCAAGCTTCCCAGGAAACTG	1	117304786	117304897	ACTGGGTTCATCAAGCAGCAAGATCTTCGCCTTACTGAGAACAGATCTAGCCAAGCACATCAACTGCTTGTGGCCATGGCTTAGGACACAGCCCCCATCCACAAGGACAAAG	TCAAGCTTCCCAGGAAACTGCTTCAGCTTCCCGATATCCGACGGTAGTGTNNNNNCACACTGGATCCAAATGAGC	117304720	117304934	-	0	1
INF1_smMIP_CFTR_70	7:117304813-117304964/21,19/-	0.921581	7	117304944	117304964	ATGATTCTGTTCCCACTGTGC	1	117304813	117304831	CTTGTGGCCATGGCTTAGG	1	117304832	117304943	TATTAAGTAACAGAACATCTGAAACTCACACTGGATCCAAATGAGCACTGGGTTCATCAAGCAGCAAGATCTTCGCCTTACTGAGAACAGATCTAGCCAAGCACATCAACTG	CTTGTGGCCATGGCTTAGGCTTCAGCTTCCCGATATCCGACGGTAGTGTNNNNNATGATTCTGTTCCCACTGTGC	117304720	117304934	-	0	1
INF1_smMIP_CFTR_71	7:117305446-117305597/18,22/-	0.900826	7	117305580	117305597	CATTGCTTCTATCCTGTG	1	117305446	117305467	TGATCTGTATTTACCTTGATAA	1	117305468	117305579	TTCACAGAGAATTACTGTGCAATCAGCAAATGCTTGTTTTAGAGTTCTTCTAATTATTTGGTATGTTCTAGAAAAGAAAGAAAATACCACACATAATATCACAGAACAGTAA	TGATCTGTATTTACCTTGATAACTTCAGCTTCCCGATATCCGACGGTAGTGTNNNNNCATTGCTTCTATCCTGTG	117305491	117305638	-	0	20
INF1_smMIP_CFTR_72	7:117305498-117305649/17,23/-	0.786799	7	117305633	117305649	TGAGATCTTAAGTAAAG	2	117305498	117305520	GGTATGTTCTAGAAAAGAAAGAA	1	117305521	117305632	TTATAAAGACTCACCAAAAATTGTTGGCATTCCAGCATTGCTTCTATCCTGTGTTCACAGAGAATTACTGTGCAATCAGCAAATGCTTGTTTTAGAGTTCTTCTAATTATTT	GGTATGTTCTAGAAAAGAAAGAACTTCAGCTTCCCGATATCCGACGGTAGTGTNNNNNTGAGATCTTAAGTAAAG	117305491	117305638	-	0	10
INF1_smMIP_CFTR_73	7:117305605-117305756/16,24/-	0.847036	7	117305741	117305756	TAAAGCTGGATGGCTG	3	117305605	117305628	AAAGACTCACCAAAAATTGTTGGC	1	117305629	117305740	TATGATACATATTTTTGAAAAGAACTTGTACATTGTTGCAATTTGCAGGAACTATCACATGTGAGATTGTTATCAAGAATTACAAGGGCAATGAGATCTTAAGTAAAGTTAT	AAAGACTCACCAAAAATTGTTGGCCTTCAGCTTCCCGATATCCGACGGTAGTGTNNNNNTAAAGCTGGATGGCTG	117305491	117305638	-	0	1
INF1_smMIP_CFTR_74	7:117306888-117307039/21,19/+	0.910384	7	117306888	117306908	CTGTGCCAGTTTCTGTCCCTG	1	117307021	117307039	GAGCCTCTTCCGGCAAGCC	1	117306909	117307020	CTCTGGTCTGACCTGCCTTCTGTCCCAGATCTCACTAACAGCCATTTCCCTAGGTCATAGAAGAGAACAAAGTGCGGCAGTACGATTCCATCCAGAAACTGCTGAACGAGAG	GAGCCTCTTCCGGCAAGCCCTTCAGCTTCCCGATATCCGACGGTAGTGTNNNNNCTGTGCCAGTTTCTGTCCCTG	117306940	117307182	+	0	1
INF1_smMIP_CFTR_75	7:117306969-117307120/20,20/-	0.798314	7	117307101	117307120	CAGAGCAGCAATCTGGGGCT	1	117306969	117306988	CTGCCGCACTTTGTTCTCTT	1	117306989	117307100	TAGACTTGCACTTGCTTGAGTTCCGGTGGGGAAAGAGCTTCACCCTGTCGGAGGGGCTGATGGCTTGCCGGAAGAGGCTCCTCTCGTTCAGCAGTTTCTGGATGGAATCGTA	CTGCCGCACTTTGTTCTCTTCTTCAGCTTCCCGATATCCGACGGTAGTGTNNNNNCAGAGCAGCAATCTGGGGCT	117306940	117307182	-	0	1
INF1_smMIP_CFTR_75b	7:117306969-117307120/20,20/-	0.798314	7	117307101	117307120	CAGAGCAGCAATTTGGGGCT	1	117306969	117306988	CTGCCGCACTTTGTTCTCTT	1	117306989	117307100	TAGACTTGCACTTGCTTGAGTTCCGGTGGGGAAAGAGCTTCACCCTGTCGGAGGGGCTGATGGCTTGCCGGAAGAGGCTCCTCTCGTTCAGCAGTTTCTGGATGGAATCGTA	CTGCCGCACTTTGTTCTCTTCTTCAGCTTCCCGATATCCGACGGTAGTGTNNNNNCAGAGCAGCAATTTGGGGCT	117306940	117307182	-	0	1
INF1_smMIP_CFTR_76	7:117307008-117307159/16,24/-	0.839575	7	117307144	117307159	AAGCCTTGTATCTTGC	2	117307008	117307031	GGAAGAGGCTCCTCTCGTTCAGCA	1	117307032	117307143	ACCTCTTCTTCTGTCTCCTCTTTCAGAGCAGCAATCTGGGGCTTAGACTTGCACTTGCTTGAGTTCCGGTGGGGAAAGAGCTTCACCCTGTCGGAGGGGCTGATGGCTTGCC	GGAAGAGGCTCCTCTCGTTCAGCACTTCAGCTTCCCGATATCCGACGGTAGTGTNNNNNAAGCCTTGTATCTTGC	117306940	117307182	-	0	1
INF1_smMIP_CFTR_77	7:117307078-117307229/22,18/-	0.924213	7	117307208	117307229	TGAGGTGACTGTCCCACGAGCT	1	117307078	117307095	TTGCACTTGCTTGAGTTC	1	117307096	117307207	CCAATTCCATGAGCAAATGTCCCATGTCAACATTTATGCTGCTCTCTAAAGCCTTGTATCTTGCACCTCTTCTTCTGTCTCCTCTTTCAGAGCAGCAATCTGGGGCTTAGAC	TTGCACTTGCTTGAGTTCCTTCAGCTTCCCGATATCCGACGGTAGTGTNNNNNTGAGGTGACTGTCCCACGAGCT	117306940	117307182	-	0	1
INF1_smMIP_NR5A1_1	9:127244960-127245111/18,22/-	0.337606	9	127245094	127245111	TACCACAAGCACCTGGGC	1	127244960	127244981	CGGGGCCGCAGCCACACCGCTG	1	127244982	127245093	AACGAGATGCCCCGCAACAACCTGCTCATCGAAATGCTGCAAGCCAAGCAGACTTGAGCCTGGGCCGGGGGCGGGGCCGGGACTGGGGGCGGGACTGGGGGCGGGGCCTGGG	CGGGGCCGCAGCCACACCGCTGCTTCAGCTTCCCGATATCCGACGGTAGTGTNNNNNTACCACAAGCACCTGGGC	127245015	127245304	-	0	20
INF1_smMIP_NR5A1_2	9:127245035-127245186/16,24/-	0.846991	9	127245171	127245186	GGGGACAAATTCCAGC	5	127245035	127245058	GCTGCAAGCCAAGCAGACTTGAGC	1	127245059	127245170	AGCTGCTGCTGTGCCTGGTGGAGGTGCGGGCCCTGAGCATGCAGGCCAAGGAGTACCTGTACCACAAGCACCTGGGCAACGAGATGCCCCGCAACAACCTGCTCATCGAAAT	GCTGCAAGCCAAGCAGACTTGAGCCTTCAGCTTCCCGATATCCGACGGTAGTGTNNNNNGGGGACAAATTCCAGC	127245015	127245304	-	0	10
INF1_smMIP_NR5A1_3	9:127245091-127245242/19,21/+	0.792815	9	127245091	127245109	GTTGCCCAGGTGCTTGTGG	1	127245222	127245242	GGGCGGCGTTGGCCTTCTCCT	1	127245110	127245221	TACAGGTACTCCTTGGCCTGCATGCTCAGGGCCCGCACCTCCACCAGGCACAGCAGCAGCTGCTGGAATTTGTCCCCGCAGTGCGGGTAGTGGCACAGGGTGTAGTCAAGCA	GGGCGGCGTTGGCCTTCTCCTCTTCAGCTTCCCGATATCCGACGGTAGTGTNNNNNGTTGCCCAGGTGCTTGTGG	127245015	127245304	+	0	5
INF1_smMIP_NR5A1_4	9:127245155-127245306/20,20/+	0.887534	9	127245155	127245174	AGGCACAGCAGCAGCTGCTG	1	127245287	127245306	GCAAAGGGAGGTTCTCGGTC	1	127245175	127245286	GAATTTGTCCCCGCAGTGCGGGTAGTGGCACAGGGTGTAGTCAAGCAGGGCGGCGTTGGCCTTCTCCTGAGCGTCTTTCACCAGGATGTGGTTATTCAGGAACTTCAAATCT	GCAAAGGGAGGTTCTCGGTCCTTCAGCTTCCCGATATCCGACGGTAGTGTNNNNNAGGCACAGCAGCAGCTGCTG	127245015	127245304	+	0	1
INF1_smMIP_NR5A1_5	9:127245224-127245375/21,19/-	0.906786	9	127245355	127245375	AGGTGGTATTGGTGATGCTGG	1	127245224	127245242	AGGAGAAGGCCAACGCCGC	1	127245243	127245354	TGACGGTGTTGGCCCAGCCCTGATGGGCATGGATGGTGACGCGATGGTGACCGAGAACCTCCCTTTGCAGATTTGAAGTTCCTGAATAACCACATCCTGGTGAAAGACGCTC	AGGAGAAGGCCAACGCCGCCTTCAGCTTCCCGATATCCGACGGTAGTGTNNNNNAGGTGGTATTGGTGATGCTGG	127245015	127245304	-	0	1
INF1_smMIP_NR5A1_6	9:127253323-127253474/16,24/+	0.717218	9	127253323	127253338	GCTGTCTCCACCTCTC	10	127253451	127253474	CAACACCAGGCTGTGCAGCAGCGA	1	127253339	127253450	TGTCACTGGAGCTGCACTCACCCAGGCTGAAGAGGATGATGAACTTGAGGCAGACAAACTCCTGCCGGTCCAGCTGCAGCGCAAGCAGCTGCAGCACCAGCTCCTGCGCCCG	CAACACCAGGCTGTGCAGCAGCGACTTCAGCTTCCCGATATCCGACGGTAGTGTNNNNNGCTGTCTCCACCTCTC	127253338	127253692	+	0	20
INF1_smMIP_NR5A1_7	9:127253350-127253501/17,23/-	0.624744	9	127253485	127253501	CTGACCACAGTGGCCAC	3	127253350	127253372	CTCTTCAGCCTGGGTGAGTGCAG	1	127253373	127253484	CCAGGCGGGCTCGCTGCTGCACAGCCTGGTGTTGCGGGCGCAGGAGCTGGTGCTGCAGCTGCTTGCGCTGCAGCTGGACCGGCAGGAGTTTGTCTGCCTCAAGTTCATCATC	CTCTTCAGCCTGGGTGAGTGCAGCTTCAGCTTCCCGATATCCGACGGTAGTGTNNNNNCTGACCACAGTGGCCAC	127253338	127253692	-	0	20
INF1_smMIP_NR5A1_8	9:127253452-127253603/17,23/-	0.540087	9	127253587	127253603	CAATCCATGCCCTCAGC	1	127253452	127253474	TCGCTGCTGCACAGCCTGGTGTT	1	127253475	127253586	CCTGCATCCCCCATCAGAGAGCCACCTGCCCGGACCCACGTCCTCTGACTGTCCCCCGCCCCGTGCCCTCTGCCCCCAGGTGGAGCTGACCACAGTGGCCACCCAGGCGGGC	TCGCTGCTGCACAGCCTGGTGTTCTTCAGCTTCCCGATATCCGACGGTAGTGTNNNNNCAATCCATGCCCTCAGC	127253338	127253692	-	0	20
INF1_smMIP_NR5A1_9	9:127253563-127253714/16,24/-	0.514953	9	127253699	127253714	GCTCGGAAGGGTGGGC	1	127253563	127253586	CCTGCATCCCCCATCAGAGAGCCA	1	127253587	127253698	CCGGCAGCGTCCCCGGGGCTGTGCAGATGTTACCCGTGCCTGGCTCGGCACCAAGGCTGGGCCCTCCTGACGCCAGCCCATCTGACCTGCACCTCCAATCCATGCCCTCAGC	CCTGCATCCCCCATCAGAGAGCCACTTCAGCTTCCCGATATCCGACGGTAGTGTNNNNNGCTCGGAAGGGTGGGC	127253338	127253692	-	0	20
INF1_smMIP_NR5A1_10	9:127255211-127255362/16,24/-	0.4609	9	127255347	127255362	CGCCAGGTCCAGCACG	1	127255211	127255234	AGAGGAGGACCCAGGCCTCTCGGG	1	127255235	127255346	GCAAGGAGGGCAGCATCCTGCTGGTCACCGGGCAGGAGGTGACCAGTCCCTCGGCCCCGCCCCTGGGCCCCGCCCTGGCCCCGCTGTGCACTTCCAGGATTCAGGGCCCCGG	AGAGGAGGACCCAGGCCTCTCGGGCTTCAGCTTCCCGATATCCGACGGTAGTGTNNNNNCGCCAGGTCCAGCACG	127255287	127255448	-	0	20
INF1_smMIP_NR5A1_11	9:127255323-127255474/16,24/-	0.542549	9	127255459	127255474	TGGACCCTGGCTGGAG	7	127255323	127255346	GCAAGGAGGGCAGCATCCTGCTGG	1	127255347	127255458	CCCGGCCCCCCGCGTGCCTCTTCCTTCCAGGTGGCCGACCAGATGACGCTGCTGCAGAACTGCTGGAGCGAGCTGCTGGTGTTCGACCACATCTACCGCCAGGTCCAGCACG	GCAAGGAGGGCAGCATCCTGCTGGCTTCAGCTTCCCGATATCCGACGGTAGTGTNNNNNTGGACCCTGGCTGGAG	127255287	127255448	-	0	20
INF1_smMIP_NR5A1_12	9:127262260-127262411/16,24/-	0.841213	9	127262396	127262411	CGTGGACTGGGCACGC	1	127262260	127262283	CCATCCTTCCCACTGGCTTCAGGC	1	127262284	127262395	AGGTGCATGGTCTTCAAGGAGCTGGAGGTGAGTCTCTCCTCCCGCCCGGCTGGCCCTGCATCATGGTCCTCCCGGCTGCCCAAGCCTTAGCCCGACTGTCCTTTGGATAGGG	CCATCCTTCCCACTGGCTTCAGGCCTTCAGCTTCCCGATATCCGACGGTAGTGTNNNNNCGTGGACTGGGCACGC	127262347	127263014	-	0	1
INF1_smMIP_NR5A1_13	9:127262332-127262483/20,20/+	0.76165	9	127262332	127262351	ATGATGCAGGGCCAGCCGGG	1	127262464	127262483	GCTGGTCGGGGCGGCTTTTG	1	127262352	127262463	CGGGAGGAGAGACTCACCTCCAGCTCCTTGAAGACCATGCACCTGCGTGCCCAGTCCACGATGGAGATGAAGGTCTGGTCGGCCATTCTGCACAGGAGGCCGAAGGCCGCCG	GCTGGTCGGGGCGGCTTTTGCTTCAGCTTCCCGATATCCGACGGTAGTGTNNNNNATGATGCAGGGCCAGCCGGG	127262347	127263014	+	0	1
INF1_smMIP_NR5A1_14	9:127262414-127262565/16,24/+	0.676584	9	127262414	127262429	GGAGATGAAGGTCTGG	3	127262542	127262565	GCTGCAGCAGCTGCAGGATGAGCT	1	127262430	127262541	TCGGCCATTCTGCACAGGAGGCCGAAGGCCGCCGGCTGGTCGGGGCGGCTTTTGGTGGGCTCCTGCAGGCAGCCCAAGATGCGGGCCCGCACCTGGTCCTCATCCGGCTCCA	GCTGCAGCAGCTGCAGGATGAGCTCTTCAGCTTCCCGATATCCGACGGTAGTGTNNNNNGGAGATGAAGGTCTGG	127262347	127263014	+	0	1
INF1_smMIP_NR5A1_15	9:127262477-127262628/22,18/-	0.637262	9	127262607	127262628	CCCCACAGCCTGGGCTGCCGTA	1	127262477	127262494	CAGGAGCCCACCAAAAGC	2	127262495	127262606	CGGCTACCCAGAGCCCTTCTCTGGAGGGCCCAACGTGCCTGAGCTCATCCTGCAGCTGCTGCAGCTGGAGCCGGATGAGGACCAGGTGCGGGCCCGCATCTTGGGCTGCCTG	CAGGAGCCCACCAAAAGCCTTCAGCTTCCCGATATCCGACGGTAGTGTNNNNNCCCCACAGCCTGGGCTGCCGTA	127262347	127263014	-	0	20
INF1_smMIP_NR5A1_16	9:127262543-127262694/16,24/-	0.778372	9	127262679	127262694	GCTACCTCTACCCTGC	1	127262543	127262566	GAGCTCATCCTGCAGCTGCTGCAG	1	127262567	127262678	CTTTCCTGGCCGTGCCATCAAGTCTGAGTACCCGGAGCCTTATGCCAGCCCCCCACAGCCTGGGCTGCCGTACGGCTACCCAGAGCCCTTCTCTGGAGGGCCCAACGTGCCT	GAGCTCATCCTGCAGCTGCTGCAGCTTCAGCTTCCCGATATCCGACGGTAGTGTNNNNNGCTACCTCTACCCTGC	127262347	127263014	-	0	20
INF1_smMIP_NR5A1_17	9:127262619-127262770/16,24/+	0.779998	9	127262619	127262634	GGCTGTGGGGGGCTGG	15	127262747	127262770	AAAGTCGCCCAGTGGCCCAGCAGG	1	127262635	127262746	CATAAGGCTCCGGGTACTCAGACTTGATGGCACGGCCAGGAAAGGCAGGGTAGAGGTAGCCAGCCAGTGGCCCGTGGGCACCGGGCACGGCCATGGGCAGTGCTGGGGCCCC	AAAGTCGCCCAGTGGCCCAGCAGGCTTCAGCTTCCCGATATCCGACGGTAGTGTNNNNNGGCTGTGGGGGGCTGG	127262347	127263014	+	0	20
INF1_smMIP_NR5A1_18	9:127262678-127262829/16,24/+	0.556839	9	127262678	127262693	GGCAGGGTAGAGGTAG	2	127262806	127262829	GCAGGCTGGGAGGCAGCACGTAGT	1	127262694	127262805	CCAGCCAGTGGCCCGTGGGCACCGGGCACGGCCATGGGCAGTGCTGGGGCCCCAAAGTCGCCCAGTGGCCCAGCAGGTGGACCGGCGGCCAGGCCCTTGGGCTCAGGCCCAT	GCAGGCTGGGAGGCAGCACGTAGTCTTCAGCTTCCCGATATCCGACGGTAGTGTNNNNNGGCAGGGTAGAGGTAG	127262347	127263014	+	0	5
INF1_smMIP_NR5A1_19	9:127262776-127262927/16,24/-	0.433349	9	127262912	127262927	CCTGAAACAGCAGAAG	7	127262776	127262799	CTGAGCCCAAGGGCCTGGCCGCCG	1	127262800	127262911	AAGGCACAGATTCGGGCCAATGGCTTCAAGCTGGAGACAGGGCCCCCGATGGGGGTGCCCCCGCCGCCCCCTCCCGCACCGGACTACGTGCTGCCTCCCAGCCTGCATGGGC	CTGAGCCCAAGGGCCTGGCCGCCGCTTCAGCTTCCCGATATCCGACGGTAGTGTNNNNNCCTGAAACAGCAGAAG	127262347	127263014	-	0	20
INF1_smMIP_NR5A1_20	9:127262872-127263023/17,23/+	0.733217	9	127262872	127262888	CTGTCTCCAGCTTGAAG	2	127263001	127263023	GCAGGGGCAGAGGGTCAGACTCA	1	127262889	127263000	CCATTGGCCCGAATCTGTGCCTTCTTCTGCTGTTTCAGGGCCCGGTCCCGCTTGTACATCGGCCCAAACTTGTTCCGGCCACCCCTCATACGGTCAGCGCGCACGGCTGTGG	GCAGGGGCAGAGGGTCAGACTCACTTCAGCTTCCCGATATCCGACGGTAGTGTNNNNNCTGTCTCCAGCTTGAAG	127262347	127263014	+	0	10
INF1_smMIP_NR5A1_21	9:127262903-127263054/18,22/+	0.770591	9	127262903	127262920	CTGTGCCTTCTTCTGCTG	4	127263033	127263054	AGCCCCCTTCCATGCTGCCCCA	1	127262921	127263032	TTTCAGGGCCCGGTCCCGCTTGTACATCGGCCCAAACTTGTTCCGGCCACCCCTCATACGGTCAGCGCGCACGGCTGTGGGCAGGGGCAGAGGGTCAGACTCACCCTCTCTA	AGCCCCCTTCCATGCTGCCCCACTTCAGCTTCCCGATATCCGACGGTAGTGTNNNNNCTGTGCCTTCTTCTGCTG	127262347	127263014	+	0	10
INF1_smMIP_NR5A1_22	9:127265320-127265471/17,23/+	0.82434	9	127265320	127265336	TGTGGGGGGTCAGGGGT	2	127265449	127265471	CTCGGTGCACGTGTAGTGCTTGT	1	127265337	127265448	CGAGGCCCGCGCGGCGCGCACCTTCCAGGCGCATCCCCACCGTCAGGCATTTCTGGAAGCGGCAGAAGGGACAGCGCTTGCGCTGCGTCTTGTCGATCTTGCAGCTCTGGCT	CTCGGTGCACGTGTAGTGCTTGTCTTCAGCTTCCCGATATCCGACGGTAGTGTNNNNNTGTGGGGGGTCAGGGGT	127265336	127265694	+	0	20
INF1_smMIP_NR5A1_23	9:127265380-127265531/16,24/+	0.794266	9	127265380	127265395	CAGGCATTTCTGGAAG	8	127265508	127265531	GCTGAGAGTCAGCGAGGCCCCGCA	1	127265396	127265507	CGGCAGAAGGGACAGCGCTTGCGCTGCGTCTTGTCGATCTTGCAGCTCTGGCTCTCGGTGCACGTGTAGTGCTTGTTGTTCTGCACCGTGCGCTTGAAGAAGCCCTGCGGGA	GCTGAGAGTCAGCGAGGCCCCGCACTTCAGCTTCCCGATATCCGACGGTAGTGTNNNNNCAGGCATTTCTGGAAG	127265336	127265694	+	0	20
INF1_smMIP_NR5A1_24	9:127265464-127265615/20,20/-	0.38338	9	127265596	127265615	GTCCGGCTACCACTACGGAC	1	127265464	127265483	CGGTGCAGAACAACAAGCAC	1	127265484	127265595	TGCTCACGTGTGAGAGCTGCAAGGTGAGCGGCGAGCGCGCGGCAGGGGTGCGGCAGACGGGCGCTGCGGGGCCTCGCTGACTCTCAGCTCCCGCAGGGCTTCTTCAAGCGCA	CGGTGCAGAACAACAAGCACCTTCAGCTTCCCGATATCCGACGGTAGTGTNNNNNGTCCGGCTACCACTACGGAC	127265336	127265694	-	0	20
INF1_smMIP_NR5A1_25	9:127265574-127265725/19,21/-	0.371114	9	127265707	127265725	TCCGCCGGCCCTCCCTGAC	1	127265574	127265594	GCTCACGTGTGAGAGCTGCAA	1	127265595	127265706	CCGCTGTCCCTCCGCAGGCGGACGCCGCGGGCATGGACTATTCGTACGACGAGGACCTGGACGAGCTGTGCCCCGTGTGCGGGGACAAGGTGTCCGGCTACCACTACGGACT	GCTCACGTGTGAGAGCTGCAACTTCAGCTTCCCGATATCCGACGGTAGTGTNNNNNTCCGCCGGCCCTCCCTGAC	127265336	127265694	-	0	20
INF1_smMIP_DMRT1_1	9:841798-841949/17,23/+	0.595634	9	841798	841814	AGAGAGGGGGCCAGAGT	2	841927	841949	GCTTTGGCAAAGCGTCTGGGGCG	1	841815	841926	GCTCGCACTTCTCCTAGGGGCACCATGCCCAACGACGAGGCATTCAGCAAGCCCTCTACACCGTCGGAAGCCCCTCACGCCCCCGGGGTACCGCCGCAGGGCAGAGCCGGGG	GCTTTGGCAAAGCGTCTGGGGCGCTTCAGCTTCCCGATATCCGACGGTAGTGTNNNNNAGAGAGGGGGCCAGAGT	841817	842212	+	0	1
INF1_smMIP_DMRT1_2	9:841840-841991/17,23/-	0.348274	9	841975	841991	GCTGCTGCCCCCGGCGC	1	841840	841862	GCTGAATGCCTCGTCGTTGGGCA	1	841863	841974	TCGAGCCGCTGGCCGCCCCCACTAGCGCCCCAGACGCTTTGCCAAAGCCCCCGGCTCTGCCCTGCGGCGGTACCCCGGGGGCGTGAGGGGCTTCCGACGGTGTAGAGGGCTT	GCTGAATGCCTCGTCGTTGGGCACTTCAGCTTCCCGATATCCGACGGTAGTGTNNNNNGCTGCTGCCCCCGGCGC	841817	842212	-	0	20
INF1_smMIP_DMRT1_3	9:841936-842087/18,22/-	0.255281	9	842070	842087	GCCGTGGTTCCTGCAGCG	1	841936	841957	CCCACTAGCGCCCCAGACGCTT	1	841958	842069	TGCGCACTTGGGCAGCCGCGGGGACTTCTTGCTCCCGGCACCCAGGTCCGACGCCCCGGAGCCGGAGCCGCCTCCTCTGCTGCTGCCCCCGGCGCTCGAGCCGCTGGCCGCC	CCCACTAGCGCCCCAGACGCTTCTTCAGCTTCCCGATATCCGACGGTAGTGTNNNNNGCCGTGGTTCCTGCAGCG	841817	842212	-	0	10
INF1_smMIP_DMRT1_4	9:842020-842171/17,23/-	0.563133	9	842155	842171	CCTCTCGGCGATCAGGT	1	842020	842042	CTTGCTCCCGGCACCCAGGTCCG	1	842043	842154	TGCACTTCTTGCACTGGCAGTCGCGCCACATGCAGAAGCGCTTGTGGCCCTTGAGCGGCGAGGCGTAGCCGTGGTTCCTGCAGCGTGCGCACTTGGGCAGCCGCGGGGACTT	CTTGCTCCCGGCACCCAGGTCCGCTTCAGCTTCCCGATATCCGACGGTAGTGTNNNNNCCTCTCGGCGATCAGGT	841817	842212	-	0	1
INF1_smMIP_DMRT1_5	9:842137-842288/17,23/+	0.910399	9	842137	842153	GCCAGTGCAAGAAGTGC	1	842266	842288	GCTCGGTTGCCCAGGCTGCAGTG	3	842154	842265	AACCTGATCGCCGAGAGGCAGCGCGTGATGGCCGCGCAGGTGGGTGCGGGCGTGCGGGAGCCCGGGTTCAGCCTTAGTTTTTTTTTTTTTTTTTTTTTTTAGATGGAGTCTC	GCTCGGTTGCCCAGGCTGCAGTGCTTCAGCTTCCCGATATCCGACGGTAGTGTNNNNNGCCAGTGCAAGAAGTGC	841817	842212	+	0	1
INF1_smMIP_DMRT1_6	9:846885-847036/22,18/-	0.930514	9	847015	847036	TCGGCCGCACTGGGCAGTGGGA	1	846885	846902	CACAGAAGCCCCACCCAT	2	846903	847014	TGGGGTGGCTGATACCCAATTCCTCCTCCTGGGCCTGCTGCCTTCTCAGGGCCACCTGGAAGCACACGACAATGAGTCATCCTCCAGCACTCCAGAATCAGCTTTGCCAAAA	CACAGAAGCCCCACCCATCTTCAGCTTCCCGATATCCGACGGTAGTGTNNNNNTCGGCCGCACTGGGCAGTGGGA	846938	847163	-	0	1
INF1_smMIP_DMRT1_7	9:846954-847105/16,24/+	0.832627	9	846954	846969	TTCCAGGTGGCCCTGA	9	847082	847105	GACTGAGTGCAGTGGCACCTCTCA	1	846970	847081	GAAGGCAGCAGGCCCAGGAGGAGGAATTGGGTATCAGCCACCCCATCCCACTGCCCAGTGCGGCCGAGCTGCTTGTCAAAAGAGAGAACAATGGCAGTAACCCGTGCCTCAT	GACTGAGTGCAGTGGCACCTCTCACTTCAGCTTCCCGATATCCGACGGTAGTGTNNNNNTTCCAGGTGGCCCTGA	846938	847163	+	0	1
INF1_smMIP_DMRT1_8	9:847047-847198/16,24/+	0.907359	9	847047	847062	AAAAGAGAGAACAATG	17	847175	847198	GCTGGGCATGAGGGAGGCCGAAGG	1	847063	847174	GCAGTAACCCGTGCCTCATGACTGAGTGCAGTGGCACCTCTCAGCCACCGCCGGCCAGTGTCCCCACCACTGCAGCTTCAGGTAATCTGGAGGGGCTGGGGTTCACATGGAG	GCTGGGCATGAGGGAGGCCGAAGGCTTCAGCTTCCCGATATCCGACGGTAGTGTNNNNNAAAAGAGAGAACAATG	846938	847163	+	0	1
INF1_smMIP_DMRT1_9b	9:893831-893982/21,19/+	0.951327	9	893831	893851	TTCGGTAGGAAGGTTTAGAAG	1	893964	893982	GGAGAACACACCTGACCTG	1	893852	893963	TAAAGTTTCGTGGACTAACATTAATACCATGTTGTATTTTTCTTTTTTCTTCCAATTTAGAGGGACGTATGGTCATCCAGGATATTCCTGCTGTCACCAGCAGAGGGCATGT	GGAGAACACACCTGACCTGCTTCAGCTTCCCGATATCCGACGGTAGTGTNNNNNTTCGGTAGGAAGGTTTAGAAG	893890	894215	+	0	1
INF1_smMIP_DMRT1_9	9:893831-893982/21,19/+	0.951327	9	893831	893851	TTGGGTAGGAAGGTTTAGAAG	1	893964	893982	GGAGAACACACCTGACCTG	1	893852	893963	TAAAGTTTCGTGGACTAACATTAATACCATGTTGTATTTTTCTTTTTTCTTCCAATTTAGAGGGACGTATGGTCATCCAGGATATTCCTGCTGTCACCAGCAGAGGGCATGT	GGAGAACACACCTGACCTGCTTCAGCTTCCCGATATCCGACGGTAGTGTNNNNNTTGGGTAGGAAGGTTTAGAAG	893890	894215	+	0	1
INF1_smMIP_DMRT1_10	9:893943-894094/18,22/+	0.875297	9	893943	893960	TGTCACCAGCAGAGGGCA	1	894073	894094	GCCTTGGCTGCTGATTCTGCTT	1	893961	894072	TGTGGAGAACACACCTGACCTGGTTTCAGACTCCACCTACTACAGCAGCTTCTACCAGCCGTCTCTGTTTCCTTATTACAACAATCTATACAACTGCCCGCAGTACTCCATG	GCCTTGGCTGCTGATTCTGCTTCTTCAGCTTCCCGATATCCGACGGTAGTGTNNNNNTGTCACCAGCAGAGGGCA	893890	894215	+	0	1
INF1_smMIP_DMRT1_11	9:893983-894134/18,22/-	0.887659	9	894117	894134	TTCACAGGGGATCCCCCG	1	893983	894004	TGTAGTAGGTGGAGTCTGAAAC	1	894005	894116	AGGGGATTTCCCACCTCCCCAGAAGCAGAATCAGCAGCCAAGGCCATGGAGTACTGCGGGCAGTTGTATAGATTGTTGTAATAAGGAAACAGAGACGGCTGGTAGAAGCTGC	TGTAGTAGGTGGAGTCTGAAACCTTCAGCTTCCCGATATCCGACGGTAGTGTNNNNNTTCACAGGGGATCCCCCG	893890	894215	-	0	1
INF1_smMIP_DMRT1_12	9:894092-894243/18,22/-	0.899754	9	894226	894243	TGTGGCTTTCACACAACC	1	894092	894113	GGATTTCCCACCTCCCCAGAAG	1	894114	894225	AGTTCACTCTCTGGGTAATTAATATCATACCTGCCACTGGTTTCCTGTCTGACCAGGCACATAAGGTCCGGGGAGGCCCCGAAGGCTGTTCTTCACAGGGGATCCCCCGAGG	GGATTTCCCACCTCCCCAGAAGCTTCAGCTTCCCGATATCCGACGGTAGTGTNNNNNTGTGGCTTTCACACAACC	893890	894215	-	0	20
INF1_smMIP_DMRT1_13	9:916709-916860/19,21/-	0.90586	9	916842	916860	AACTGGGGCACGCTCTGGC	1	916709	916729	CAACATTGCATGTCACAACTA	1	916730	916841	CCAGGTAAGAGGGAGGCGGGTAGTAAGAATGCATCCTGTACTGGGAGCTCATTGCATGGCGGTTCTCCATGTTCTTCATCTGCTTAAGAAAAAAGAAGAAATATACTGAGAT	CAACATTGCATGTCACAACTACTTCAGCTTCCCGATATCCGACGGTAGTGTNNNNNAACTGGGGCACGCTCTGGC	916741	916927	-	0	1
INF1_smMIP_DMRT1_14	9:916818-916969/16,24/-	0.878859	9	916954	916969	CCCAATACTGGATAGC	3	916818	916841	CCAGGTAAGAGGGAGGCGGGTAGT	1	916842	916953	CATCCTCTCTCAACCCCAAATCCAGTCTGTGTGACCAGACACCTACCGCTCGCCCTGGCTTCCGGGTAAGAGGGAGCATCCTCAAAAGTGAAGAACTGGGGCACGCTCTGGC	CCAGGTAAGAGGGAGGCGGGTAGTCTTCAGCTTCCCGATATCCGACGGTAGTGTNNNNNCCCAATACTGGATAGC	916741	916927	-	0	1
INF1_smMIP_DMRT1_15	9:967932-968083/16,24/-	0.930709	9	968068	968083	GCTCACATTCAAGCAC	1	967932	967955	AAAGGGAGAAAGGGAGTAATGTTA	1	967956	968067	TGCCTTTGTGCTCTTGTTACTAATAGGAGAGCTGCTCGAGAGGGAAACCAAGCCAGAATCTTGACTGCTGGGCGGCGAGAATACTGCGAAGTGAGGTGAGAGAGAAAGAGAG	AAAGGGAGAAAGGGAGTAATGTTACTTCAGCTTCCCGATATCCGACGGTAGTGTNNNNNGCTCACATTCAAGCAC	967963	968159	-	10	1
INF1_smMIP_DMRT1_16	9:968023-968174/16,24/-	0.884799	9	968159	968174	ACTCCAAGTGAACCGC	1	968023	968046	AATAGGAGAGCTGCTCGAGAGGGA	1	968047	968158	CATCGGCAGCAGGCACTGCTCACTCGTCCTCCTCGATGACGGGAGTGACTGTGAAGCTGCTGGGCTCCGACGCAGGCTCACATTCAAGCACTGCCTTTGTGCTCTTGTTACT	AATAGGAGAGCTGCTCGAGAGGGACTTCAGCTTCCCGATATCCGACGGTAGTGTNNNNNACTCCAAGTGAACCGC	967963	968159	-	0	1
INF1_smMIP_DMRT1_17	9:968127-968278/17,23/-	0.895418	9	968262	968278	ACTAAACTCTAAGGAAT	2	968127	968149	CAGGCACTGCTCACTCGTCCTCC	1	968150	968261	ATAAACCAAATACGTTCTCAACAGTTAAGATAGTATGAGTCAATGCAAAATATTAACAAACCCCATGGAAAGTGGAATAAGCCTGTTACTCCAAGTGAACCGCCATCGGCAG	CAGGCACTGCTCACTCGTCCTCCCTTCAGCTTCCCGATATCCGACGGTAGTGTNNNNNACTAAACTCTAAGGAAT	967963	968159	-	0	1
INF1_smMIP_NR0B1_1	X:30322654-30322805/19,21/-	0.918399	X	30322787	30322805	TGCTGAGATTCATCAATGC	1	30322654	30322674	GCAGTAGTGCAGTTCACCATG	1	30322675	30322786	CAATGTCATTGCTGAACTGTTCTTCAGGCCCATCATCGGCACAGTCAGCATGGATGATATGATGCTGGAAATGCTCTGTACAAAGATATAAAGTCATGTGGGCCACACAAGT	GCAGTAGTGCAGTTCACCATGCTTCAGCTTCCCGATATCCGACGGTAGTGTNNNNNTGCTGAGATTCATCAATGC	30322674	30322960	-	0	1
INF1_smMIP_NR0B1_2	X:30322757-30322908/20,20/-	0.915019	X	30322889	30322908	CAGGGACTCCAGTGGGGAAC	1	30322757	30322776	GCTGAACTGTTCTTCAGGCC	1	30322777	30322888	TCAGCAAATACTCAGTGAACACACCAGGATGACGCACCAAGGGCCCCATGACAGATTCATCGAACTTAATAGTACCCTTTTCCTGCTGAGATTCATCAATGCCAATGTCATT	GCTGAACTGTTCTTCAGGCCCTTCAGCTTCCCGATATCCGACGGTAGTGTNNNNNCAGGGACTCCAGTGGGGAAC	30322674	30322960	-	0	1
INF1_smMIP_NR0B1_3	X:30322835-30322986/21,19/+	0.910559	X	30322835	30322855	CTGTCATGGGGCCCTTGGTGC	1	30322968	30322986	AAAACAGCTCACCACAGAG	1	30322856	30322967	GTCATCCTGGTGTGTTCACTGAGTATTTGCTGAGTTCCCCACTGGAGTCCCTGAATGTACTTCACGCACTGCAGGCCCGGCACGTCTGGAGGGAGAAAAATCTCTTTGTTAT	AAAACAGCTCACCACAGAGCTTCAGCTTCCCGATATCCGACGGTAGTGTNNNNNCTGTCATGGGGCCCTTGGTGC	30322674	30322960	+	0	20
INF1_smMIP_NR0B1_4	X:30326274-30326425/17,23/+	0.910992	X	30326274	30326290	GAGCTGGGAAAAGCCGG	2	30326403	30326425	CTTGGACCTGGGAGGCGGAGGGC	1	30326291	30326402	CGCCTAAGGCCAGTACCCTTACCCGGGTTAAAGAGCACGGTCCCCTTGAGGTAGGCGTACTCCTTGGTACTGATGTTCAGACTCCAGCATTTGGAAAGAAAGCACTTGATGG	CTTGGACCTGGGAGGCGGAGGGCCTTCAGCTTCCCGATATCCGACGGTAGTGTNNNNNGAGCTGGGAAAAGCCGG	30326291	30327500	+	0	1
INF1_smMIP_NR0B1_5	X:30326341-30326492/22,18/+	0.81797	X	30326341	30326362	GTAGGCGTACTCCTTGGTACTG	1	30326475	30326492	CGGGCAGTGGCTCGTTGC	1	30326363	30326474	ATGTTCAGACTCCAGCATTTGGAAAGAAAGCACTTGATGGCTTGGACCTGGGAGGCGGAGGGCACCTTCCTGGCCTCCGCCGGCGGTGCCAAATGGTGCTGCAGCGTGGGCA	CGGGCAGTGGCTCGTTGCCTTCAGCTTCCCGATATCCGACGGTAGTGTNNNNNGTAGGCGTACTCCTTGGTACTG	30326291	30327500	+	0	1
INF1_smMIP_NR0B1_6	X:30326396-30326547/16,24/-	0.800803	X	30326532	30326547	TCGGAGCCCAGCATGC	2	30326396	30326419	CGCCTCCCAGGTCCAAGCCATCAA	1	30326420	30326531	TGCAGAAGATCCTCACCACCAGGCGGCGGGAGACCGGGGGCAACGAGCCACTGCCCGTGCCCACGCTGCAGCACCATTTGGCACCGCCGGCGGAGGCCAGGAAGGTGCCCTC	CGCCTCCCAGGTCCAAGCCATCAACTTCAGCTTCCCGATATCCGACGGTAGTGTNNNNNTCGGAGCCCAGCATGC	30326291	30327500	-	0	1
INF1_smMIP_NR0B1_7	X:30326510-30326661/16,24/+	0.728575	X	30326510	30326525	CTGGTGGTGAGGATCT	2	30326638	30326661	GTCCAGGGGCAGCACCTGGAAGCA	1	30326526	30326637	TCTGCAGCATGCTGGGCTCCGAGACTTCCACAGTCTCGAACTGCAAGCGGTCCTGGGCCAGCTCAAGCATGAGCAGGGACGCCCAGCAGTTGCGCACCAGCACCAGCTGCTG	GTCCAGGGGCAGCACCTGGAAGCACTTCAGCTTCCCGATATCCGACGGTAGTGTNNNNNCTGGTGGTGAGGATCT	30326291	30327500	+	0	1
INF1_smMIP_NR0B1_8	X:30326588-30326739/16,24/+	0.698646	X	30326588	30326603	TCAAGCATGAGCAGGG	7	30326716	30326739	GCAGACCACCTGTGGACTCTTGAG	1	30326604	30326715	ACGCCCAGCAGTTGCGCACCAGCACCAGCTGCTGGTCCAGGGGCAGCACCTGGAAGCAGGGCAAGTACTTGACGAAGCGCAGCGTCTTCAACAGGCCCGCTGAGGCTGCCTC	GCAGACCACCTGTGGACTCTTGAGCTTCAGCTTCCCGATATCCGACGGTAGTGTNNNNNTCAAGCATGAGCAGGG	30326291	30327500	+	0	10
INF1_smMIP_NR0B1_9	X:30326622-30326773/16,24/-	0.562874	X	30326758	30326773	GGACACCTCCTCTGGT	2	30326622	30326645	CCCTGGACCAGCAGCTGGTGCTGG	1	30326646	30326757	GCGCTGCGGCCGGTGGCGCTCAAGAGTCCACAGGTGGTCTGCGAGGCAGCCTCAGCGGGCCTGTTGAAGACGCTGCGCTTCGTCAAGTACTTGCCCTGCTTCCAGGTGCTGC	CCCTGGACCAGCAGCTGGTGCTGGCTTCAGCTTCCCGATATCCGACGGTAGTGTNNNNNGGACACCTCCTCTGGT	30326291	30327500	-	0	10
INF1_smMIP_NR0B1_10	X:30326712-30326863/16,24/-	0.479842	X	30326848	30326863	CCCGCAGCAGGGCAGC	2	30326712	30326735	AGAGTCCACAGGTGGTCTGCGAGG	1	30326736	30326847	ACCCTCTACTGCGTGCCCACGAGCACAAATCAAGCGCAGGCGGCTCCGGAGGAGCGGCCGAGGGCCCCCTGGTGGGACACCTCCTCTGGTGCGCTGCGGCCGGTGGCGCTCA	AGAGTCCACAGGTGGTCTGCGAGGCTTCAGCTTCCCGATATCCGACGGTAGTGTNNNNNCCCGCAGCAGGGCAGC	30326291	30327500	-	0	1
INF1_smMIP_NR0B1_11	X:30326815-30326966/21,19/-	0.716967	X	30326946	30326966	GGGACCGCTCCTACTTCGCGC	1	30326815	30326833	GCCCACGAGCACAAATCAA	1	30326834	30326945	AGAGGCCAGGGGGTAAAGAGGCGCTACCAGGCGGGCGGGCCACGGCGCTTCTGTACCGCTGCTGCTTTTGCGGTGAAGACCACCCGCAGCAGGGCAGCACCCTCTACTGCGT	GCCCACGAGCACAAATCAACTTCAGCTTCCCGATATCCGACGGTAGTGTNNNNNGGGACCGCTCCTACTTCGCGC	30326291	30327500	-	0	1
INF1_smMIP_NR0B1_12	X:30326921-30327072/16,24/-	0.635197	X	30327057	30327072	GAAGACCACCCGCGGC	1	30326921	30326944	GAGGCCAGGGGGTAAAGAGGCGCT	1	30326945	30327056	AGGGCAGCATCCTCTACAGCTTGCTCACTAGCTCAAAGCAAACGCACGTGGCTCCGGCAGCGCCCGAGGCACGGCCAGGGGGCGCGTGGTGGGACCGCTCCTACTTCGCGCA	GAGGCCAGGGGGTAAAGAGGCGCTCTTCAGCTTCCCGATATCCGACGGTAGTGTNNNNNGAAGACCACCCGCGGC	30326291	30327500	-	0	1
INF1_smMIP_NR0B1_13	X:30327005-30327156/18,22/-	0.666495	X	30327139	30327156	TGCGGCTCTGATCCCGGG	1	30327005	30327026	GCTCAAAGCAAACGCACGTGGC	1	30327027	30327138	GTGGGCAGAGCGGGGCTTCCGGGTGGGCGGCCCGTGGCACTCCTGTACCGCTGCTGCTTTTGTGGTGAAGACCACCCGCGGCAGGGCAGCATCCTCTACAGCTTGCTCACTA	GCTCAAAGCAAACGCACGTGGCCTTCAGCTTCCCGATATCCGACGGTAGTGTNNNNNTGCGGCTCTGATCCCGGG	30326291	30327500	-	0	1
INF1_smMIP_NR0B1_14	X:30327116-30327267/18,22/-	0.470121	X	30327250	30327267	GACCACCCACGGCAGGGC	1	30327116	30327137	TGGGCAGAGCGGGGCTTCCGGG	1	30327138	30327249	AGCATCCTCTACAGCATGCTGACGAGCGCAAAGCAAACGTACGCGGCACCGAAGGCGCCCGAGGCGACGCTGGGTCCGTGCTGGGGCTGTTCGTGCGGCTCTGATCCCGGGG	TGGGCAGAGCGGGGCTTCCGGGCTTCAGCTTCCCGATATCCGACGGTAGTGTNNNNNGACCACCCACGGCAGGGC	30326291	30327500	-	0	1
INF1_smMIP_NR0B1_15	X:30327215-30327366/22,18/-	0.604669	X	30327345	30327366	TGGGGCTGTTCGTGCGGCGATG	1	30327215	30327232	GCTGACGAGCGCAAAGCA	1	30327233	30327344	AGCCCGGGGTGGGCAGAGAGGGGCTGCTGGGCGGGCGGAACGTGGCGCTCCTGTACCGCTGCTGCTTTTGCGGTAAAGACCACCCACGGCAGGGCAGCATCCTCTACAGCAT	GCTGACGAGCGCAAAGCACTTCAGCTTCCCGATATCCGACGGTAGTGTNNNNNTGGGGCTGTTCGTGCGGCGATG	30326291	30327500	-	0	1
INF1_smMIP_NR0B1_16	X:30327312-30327463/16,24/-	0.667965	X	30327448	30327463	CCAGTGGCAGGGCAGC	13	30327312	30327335	TGGGCAGAGAGGGGCTGCTGGGCG	1	30327336	30327447	ATCCTCTACAACATGCTTATGAGCGCGAAGCAAACGCGCGCGGCTCCTGAGGCTCCAGAGACGCGGCTGGTGGATCAGTGCTGGGGCTGTTCGTGCGGCGATGAGCCCGGGG	TGGGCAGAGAGGGGCTGCTGGGCGCTTCAGCTTCCCGATATCCGACGGTAGTGTNNNNNCCAGTGGCAGGGCAGC	30326291	30327500	-	0	1
INF1_smMIP_NR0B1_17	X:30327408-30327559/21,19/-	0.696415	X	30327539	30327559	GCGCCTGCGTGCGCGCTAGGT	1	30327408	30327426	AGCGCGAAGCAAACGCGCG	1	30327427	30327538	ATAAATAGGTCCCAGGAGGCAGCCACTGGGCAGAACTGGGCTACGGGCGCCGCGGGCCATGGCGGGCGAGAACCACCAGTGGCAGGGCAGCATCCTCTACAACATGCTTATG	AGCGCGAAGCAAACGCGCGCTTCAGCTTCCCGATATCCGACGGTAGTGTNNNNNGCGCCTGCGTGCGCGCTAGGT	30326291	30327500	-	0	20
INF1_smMIP_TEX11_1	X:69748900-69749051/16,24/+	0.897312	X	69748900	69748915	AGCATCTCGGGACAAT	2	69749028	69749051	GCATATTCATCTGGGAAAGAGAAC	1	69748916	69749027	GTATCTTCTTCATGTGGCCATGAGCTTGCCTAATCTGACTTGCTCCAGTAGCCATGTTCATGAAAAACTGGGCCCTTGTTGTTACTCAATGCTTCCACAAGCTGACTATACA	GCATATTCATCTGGGAAAGAGAACCTTCAGCTTCCCGATATCCGACGGTAGTGTNNNNNAGCATCTCGGGACAAT	69748923	69749057	+	0	1
INF1_smMIP_TEX11_2	X:69748947-69749098/20,20/-	0.902652	X	69749079	69749098	GGGAAGCTTTCCCACATTTC	1	69748947	69748966	CTACTGGAGCAAGTCAGATT	1	69748967	69749078	TTTTTCCCCTCAAGAAATCTATTTGTTGTTCTCTTTCCCAGATGAATATGCTGTATAGTCAGCTTGTGGAAGCATTGAGTAACAACAAGGGCCCAGTTTTTCATGAACATGG	CTACTGGAGCAAGTCAGATTCTTCAGCTTCCCGATATCCGACGGTAGTGTNNNNNGGGAAGCTTTCCCACATTTC	69748923	69749057	-	0	1
INF1_smMIP_TEX11_3	X:69749629-69749780/17,23/+	0.905983	X	69749629	69749645	CCATAACCTCTTGCCCC	3	69749758	69749780	GCAGATGCATACTTGCTCCTGCT	1	69749646	69749757	CTAGGTCATGTCATCTGCCCTAGCCCTCTCCCTCCTTACCTGAGTTTCATAGCTTTCCTTGAAGGAGGTAAGGTGGTTAAGGAAACGCAAGGCCAGGCCACACCACTTTTCA	GCAGATGCATACTTGCTCCTGCTCTTCAGCTTCCCGATATCCGACGGTAGTGTNNNNNCCATAACCTCTTGCCCC	69749663	69749869	+	0	1
INF1_smMIP_TEX11_4	X:69749698-69749849/19,21/-	0.830639	X	69749831	69749849	AAAGACTACCCAGAAATGG	1	69749698	69749718	CCTTACCTCCTTCAAGGAAAG	1	69749719	69749830	AGATTCTCTGGCTGATGGTCAAGTCCTGGAATACCGGAGTACTTATGTTTAGCAGGAGCAAGTATGCATCTGCTGAAAAGTGGTGTGGCCTGGCCTTGCGTTTCCTTAACCA	CCTTACCTCCTTCAAGGAAAGCTTCAGCTTCCCGATATCCGACGGTAGTGTNNNNNAAAGACTACCCAGAAATGG	69749663	69749869	-	0	1
INF1_smMIP_TEX11_5	X:69749754-69749905/20,20/-	0.901458	X	69749886	69749905	GTGCCACAATGAACTGTGAC	1	69749754	69749773	GCAAGTATGCATCTGCTGAA	1	69749774	69749885	AGTAATAACTGCAAAATTTCTGTTCTTGGATTATAGAAAGACTACCCAGAAATGGAGATTCTCTGGCTGATGGTCAAGTCCTGGAATACCGGAGTACTTATGTTTAGCAGGA	GCAAGTATGCATCTGCTGAACTTCAGCTTCCCGATATCCGACGGTAGTGTNNNNNGTGCCACAATGAACTGTGAC	69749663	69749869	-	0	1
INF1_smMIP_TEX11_6	X:69771924-69772075/16,24/+	0.905753	X	69771924	69771939	CAGTTCAGTTCTTTAA	15	69772052	69772075	GCCCCATCTGGCACTGAGAGGTTA	1	69771940	69772051	AATTAACTGAAAGTTTAATATCACTATTTGACTTACAGTGCGGCTAATGTGGCTCAGAGCATCTTCAAAATAGCCCCAAACTTCTTCCAGGGGACAGAGCTCTACATTCGAC	GCCCCATCTGGCACTGAGAGGTTACTTCAGCTTCCCGATATCCGACGGTAGTGTNNNNNCAGTTCAGTTCTTTAA	69771954	69772116	+	0	1
INF1_smMIP_TEX11_7	X:69772032-69772183/18,22/+	0.915504	X	69772032	69772049	GACAGAGCTCTACATTCG	1	69772162	69772183	AGTAAAACCTGGATCTCATCCC	1	69772050	69772161	ACGCCCCATCTGGCACTGAGAGGTTAACCAAGTTGTGCATACATTTGCTGAAAATCAAAAAGAGAAAACTCATCCCATAAGGAAAGAAATCATTGGCTTCATGGCTAAGATA	AGTAAAACCTGGATCTCATCCCCTTCAGCTTCCCGATATCCGACGGTAGTGTNNNNNGACAGAGCTCTACATTCG	69771954	69772116	+	0	10
INF1_smMIP_TEX11_8	X:69773107-69773258/16,24/-	0.907659	X	69773243	69773258	CAATGGAAAAGCCTGC	2	69773107	69773130	TGCTAGCCAAAAGAACTATAGTCA	1	69773131	69773242	ACACTATCCTTTGATTGCTCTCAAGGCCTTGAAAAAGGCTTTATTGCTCTACAAAAAGGAAGAACCAATTGATATATCACAATACAGGTTAGTAAATACAATCCAGCCTTTT	TGCTAGCCAAAAGAACTATAGTCACTTCAGCTTCCCGATATCCGACGGTAGTGTNNNNNCAATGGAAAAGCCTGC	69773134	69773284	-	0	1
INF1_smMIP_TEX11_9	X:69773175-69773326/16,24/+	0.932129	X	69773175	69773190	TTGGTTCTTCCTTTTT	19	69773303	69773326	TGTCACCCATCACAGTTTTCATCC	1	69773191	69773302	GTAGAGCAATAAAGCCTTTTTCAAGGCCTTGAGAGCAATCAAAGGATAGTGTGCAGGCTTTTCCATTGCTATTACTAGAGTAAGAAAAGGAAAAAGGTTGTGAACATGATAA	TGTCACCCATCACAGTTTTCATCCCTTCAGCTTCCCGATATCCGACGGTAGTGTNNNNNTTGGTTCTTCCTTTTT	69773134	69773284	+	0	1
INF1_smMIP_TEX11_10	X:69774455-69774606/17,23/-	0.909676	X	69774590	69774606	GAGTTTGAAGTTAGAGC	3	69774455	69774477	GTAAGGCTGGTGCCCATTTAGAT	1	69774478	69774589	CAAATTGAATGATCCATTACTGGAAAGCTTCCTGGAATCAGTGTGGGAGTTGCCTCATTTAGAAACTAAAACTTTTGAAACAATTGCAAGTAAGAGCTATATTTATGCTTTT	GTAAGGCTGGTGCCCATTTAGATCTTCAGCTTCCCGATATCCGACGGTAGTGTNNNNNGAGTTTGAAGTTAGAGC	69774479	69774670	-	0	1
INF1_smMIP_TEX11_11	X:69774525-69774676/16,24/-	0.851566	X	69774661	69774676	ATGTTGCATTTTTGCC	3	69774525	69774548	TGTGGGAGTTGCCTCATTTAGAAA	1	69774549	69774660	TCTTTCTTAGGGACCTTCTCAAATGATTCATGTGAGAAATTGCTTCTGCTGTACGAGTTTGAAGTTAGAGCCAAATTGAATGATCCATTACTGGAAAGCTTCCTGGAATCAG	TGTGGGAGTTGCCTCATTTAGAAACTTCAGCTTCCCGATATCCGACGGTAGTGTNNNNNATGTTGCATTTTTGCC	69774479	69774670	-	0	1
INF1_smMIP_TEX11_12	X:69774633-69774784/16,24/-	0.907823	X	69774769	69774784	GTGAAGATGACCTTCA	5	69774633	69774656	TCTTAGGGACCTTCTCAAATGATT	1	69774657	69774768	AATTGTAAGTAAAATTAATATTTCTTAGAAGGAAAACCTCTCCAGTTAGTGAAATTACAACCAAAGAGAATAATATAATATAATCACAAAGAATGTTGCATTTTTGCCTCTT	TCTTAGGGACCTTCTCAAATGATTCTTCAGCTTCCCGATATCCGACGGTAGTGTNNNNNGTGAAGATGACCTTCA	69774479	69774670	-	0	1
INF1_smMIP_TEX11_13	X:69811526-69811677/19,21/+	0.902573	X	69811526	69811544	GGTGACAAAAGACTTGTTT	1	69811657	69811677	CGACTCAGGAACATGGTCTGT	1	69811545	69811656	ATTCGATTCTAAGCTCCTTTCAAACTGTGTTACCAAACTTCCAGTTCCTACTGTACCTGTTTGTTTCAGGAAATTATGGATGTCATTGCATGTCTGGATCTCCTCAAGTGCA	CGACTCAGGAACATGGTCTGTCTTCAGCTTCCCGATATCCGACGGTAGTGTNNNNNGGTGACAAAAGACTTGTTT	69811579	69811693	+	0	1
INF1_smMIP_TEX11_14	X:69811571-69811722/17,23/-	0.813212	X	69811706	69811722	AGTTCTTTTTTGTTGGG	1	69811571	69811593	AGGAACTGGAAGTTTGGTAACAC	1	69811594	69811705	ACTAATTAACTTGTTGCACTGTTGCCAAACAGACCATGTTCCTGAGTCGTGCACTTGAGGAGATCCAGACATGCAATGACATCCATAATTTCCTGAAACAAACAGGTACAGT	AGGAACTGGAAGTTTGGTAACACCTTCAGCTTCCCGATATCCGACGGTAGTGTNNNNNAGTTCTTTTTTGTTGGG	69811579	69811693	-	0	1
INF1_smMIP_TEX11_15	X:69825147-69825298/16,24/-	0.874727	X	69825283	69825298	GCAGTTGATCTAGAGC	4	69825147	69825170	GATTCTCTTTAGAGAATCCTTTTC	1	69825171	69825282	AAGGGAGAAAAGCTTCAACAGCTTTTGAACAGGTAATGTGCAACCTTCAAAGAAAAGACAAGAGTTCAGTGTGCTATTTGATATGTTTGCCTTCCCTGATGCAGTTCTTTTT	GATTCTCTTTAGAGAATCCTTTTCCTTCAGCTTCCCGATATCCGACGGTAGTGTNNNNNGCAGTTGATCTAGAGC	69825229	69825387	-	0	1
INF1_smMIP_TEX11_16	X:69825259-69825410/16,24/-	0.890604	X	69825395	69825410	AGAATTCTCACTATTC	6	69825259	69825282	AAGGGAGAAAAGCTTCAACAGCTT	1	69825283	69825394	ATTGATGTTCTGGTTACTTCTTATCAGATGTCCCAGTTTTGTCCTTCTGATCAAGTAATTCTGATTGCACGGAAAACATGTTTACTTATGGCAGTTGCAGTTGATCTAGAGC	AAGGGAGAAAAGCTTCAACAGCTTCTTCAGCTTCCCGATATCCGACGGTAGTGTNNNNNAGAATTCTCACTATTC	69825229	69825387	-	0	1
INF1_smMIP_TEX11_17	X:69826737-69826888/17,23/-	0.814359	X	69826872	69826888	AATTTCCAGCTTGGAAC	1	69826737	69826759	AACCACTATGGCTATAGTAAAGG	1	69826760	69826871	TTGGCTGTGCAATGTGACAAAGATCCAGTGATGATGAGAGAGTTTTTTATACTTTCTTATAAGGTAAGTTTCTTTTAATAAGTATCTCATGTATGGACCACAACAAGGCTAT	AACCACTATGGCTATAGTAAAGGCTTCAGCTTCCCGATATCCGACGGTAGTGTNNNNNAATTTCCAGCTTGGAAC	69826787	69826899	-	0	1
INF1_smMIP_TEX11_18	X:69826848-69826999/17,23/-	0.89425	X	69826983	69826999	AGAAACCCCTTACTAGT	2	69826848	69826870	TGGCTGTGCAATGTGACAAAGAT	1	69826871	69826982	ATGTTAATATCAAAGGTGTAAGTATCAGAAATTGTAATGGTACAGACTAAATGGTAGATTTTCATAATTTCATATTATTATGTTATTTCATGTTAATTTCCAGCTTGGAACT	TGGCTGTGCAATGTGACAAAGATCTTCAGCTTCCCGATATCCGACGGTAGTGTNNNNNAGAAACCCCTTACTAGT	69826787	69826899	-	0	1
INF1_smMIP_TEX11_19	X:69828886-69829037/18,22/-	0.906649	X	69829020	69829037	TTTGATGCAGCCTTTGTG	1	69828886	69828907	GTGGGGTGGTGGAATTAGACAG	1	69828908	69829019	AAACTTTCTCAGCCTTTTGGTGAAGAAGCCTTAAGTTTGGAGTCAAGAGCTAATGAAGCTCAGTGGTTTCGAAAAACAGGTAAGAGGAAATTCTGTGGCTCTGGGAAACATT	GTGGGGTGGTGGAATTAGACAGCTTCAGCTTCCCGATATCCGACGGTAGTGTNNNNNTTTGATGCAGCCTTTGTG	69828919	69829047	-	0	1
INF1_smMIP_TEX11_20	X:69828967-69829118/16,24/+	0.909603	X	69828967	69828982	TTAGCTCTTGACTCCA	6	69829095	69829118	GCTTTAAGAACAGTCTCACAGGAG	1	69828983	69829094	AACTTAAGGCTTCTTCACCAAAAGGCTGAGAAAGTTTCACAAAGGCTGCATCAAACAGGAAAATTTGATACTGATGGTCTTATTTTATACTCTAGCAAAATTGTTTAATCCT	GCTTTAAGAACAGTCTCACAGGAGCTTCAGCTTCCCGATATCCGACGGTAGTGTNNNNNTTAGCTCTTGACTCCA	69828919	69829047	+	0	1
INF1_smMIP_TEX11_21	X:69830287-69830438/22,18/-	0.862888	X	69830417	69830438	TAAAGATTTGGAGCAGTTGGAA	1	69830287	69830304	CTGTTGAATTCTCCAAGT	1	69830305	69830416	AATATCCTTTTCTTTATTTTTAGGAAGAAAGAAATGGATCGACTTTTGACTTGCCTGAATAGAGGTAAATATCTCCCTGGTTATATTCAGTCCTTCATCTTGCCTCTATTCT	CTGTTGAATTCTCCAAGTCTTCAGCTTCCCGATATCCGACGGTAGTGTNNNNNTAAAGATTTGGAGCAGTTGGAA	69830331	69830413	-	0	10
INF1_smMIP_TEX11_22	X:69843758-69843909/19,21/-	0.857081	X	69843891	69843909	CACATGTTTCTTCCTAACC	1	69843758	69843778	GATGTATTCCCCATTAGACAA	1	69843779	69843890	TAAGAATCACTTTCCATATTACTTTGTCATACAGGTGTTTGCTTCGTTTTCTTCTTCCAAAAATTGCTGAAATGCCGGAATCTGAAGATAAGTGAGTTATTTCAACAAAAAT	GATGTATTCCCCATTAGACAACTTCAGCTTCCCGATATCCGACGGTAGTGTNNNNNCACATGTTTCTTCCTAACC	69843778	69843876	-	0	1
INF1_smMIP_TEX11_23	X:69844618-69844769/16,24/+	0.865359	X	69844618	69844633	GGCAGTTTATTGACTA	2	69844746	69844769	GCTTTTTCTGCCACAATTTGTTGT	1	69844634	69844745	AGAGCAAGATAAGCAGAGGAAATACTTTCTCTTCCACAGGATGTAGGTTACTTACTTTACAGCTGTAAGAACTTGTTCCTGGTCTTCTGAATGTTGAGCTAAATATTCCAAA	GCTTTTTCTGCCACAATTTGTTGTCTTCAGCTTCCCGATATCCGACGGTAGTGTNNNNNGGCAGTTTATTGACTA	69844667	69844794	+	0	1
INF1_smMIP_TEX11_24	X:69844659-69844810/16,24/-	0.689957	X	69844795	69844810	AGATGTAATTTAACGT	1	69844659	69844682	AACCTACATCCTGTGGAAGAGAAA	1	69844683	69844794	ATTATATTTGTTCTTTTTAGAATGGACAACAAATTGTGGCAGAAAAAGCTTTGGAATATTTAGCTCAACATTCAGAAGACCAGGAACAAGTTCTTACAGCTGTAAAGTAAGT	AACCTACATCCTGTGGAAGAGAAACTTCAGCTTCCCGATATCCGACGGTAGTGTNNNNNAGATGTAATTTAACGT	69844667	69844794	-	0	20
INF1_smMIP_TEX11_25	X:69849397-69849548/16,24/+	0.651633	X	69849397	69849412	CTATTAATTGTCTTTC	10	69849525	69849548	TCATTATCTTCTGACTCTTCATCT	1	69849413	69849524	AAAAAGGAAAAGGGATAAAAATCTAGTAGATGAATACATATGAATTACCTCTAGAGCAAACTGGGCAGCTAAACTTAGAAGCATGGTAGGTGAACCTCTCTCTGCAACTAGA	TCATTATCTTCTGACTCTTCATCTCTTCAGCTTCCCGATATCCGACGGTAGTGTNNNNNCTATTAATTGTCTTTC	69849439	69849605	+	0	20
INF1_smMIP_TEX11_26	X:69849448-69849599/16,24/+	0.840718	X	69849448	69849463	ACATATGAATTACCTC	15	69849576	69849599	GCCTGCAAAGCTGAAAAACAAGAA	1	69849464	69849575	TAGAGCAAACTGGGCAGCTAAACTTAGAAGCATGGTAGGTGAACCTCTCTCTGCAACTAGATCATTATCTTCTGACTCTTCATCTGTTAATATATTCTCTAAAGTAATTATT	GCCTGCAAAGCTGAAAAACAAGAACTTCAGCTTCCCGATATCCGACGGTAGTGTNNNNNACATATGAATTACCTC	69849439	69849605	+	0	1
INF1_smMIP_TEX11_27	X:69849502-69849653/16,24/-	0.676277	X	69849638	69849653	ATTAACCATAGATATG	3	69849502	69849525	ATCTAGTTGCAGAGAGAGGTTCAC	1	69849526	69849637	TAATTTCTTTGATTAGAGTATATCATTTTTGAATTTTTTTCTTGTTTTTCAGCTTTGCAGGCAATAATTACTTTAGAGAATATATTAACAGATGAAGAGTCAGAAGATAATG	ATCTAGTTGCAGAGAGAGGTTCACCTTCAGCTTCCCGATATCCGACGGTAGTGTNNNNNATTAACCATAGATATG	69849439	69849605	-	0	1
INF1_smMIP_TEX11_28	X:69871233-69871384/20,20/+	0.927163	X	69871233	69871252	GTGGTTGAAGAGGATTATTT	1	69871365	69871384	GGGTCATGTCGTTCAGCTTC	1	69871253	69871364	ATTCTTTGTGTTAATAGTCAAATATAAGTGACAAATAAAATTTATACCTCTTTCAGAGTTGCCCTCTATGACTGCAATCTTGAATATATAAAATTGAGTGAAAACGTTCCTA	GGGTCATGTCGTTCAGCTTCCTTCAGCTTCCCGATATCCGACGGTAGTGTNNNNNGTGGTTGAAGAGGATTATTT	69871278	69871422	+	0	1
INF1_smMIP_TEX11_29	X:69871342-69871493/17,23/-	0.889212	X	69871477	69871493	AGCCATTTTGACTACCT	1	69871342	69871364	TAGGAACGTTTTCACTCAATTTT	1	69871365	69871476	TAATGATATTAGTAAAATATGGTAAGTCCTTCCTTGTAGATTTTATTAAAATGACCCAGTGTTTTTCTTTCCAGGCCAAAGAGGCAGTGGCAGAAGCTGAACGACATGACCC	TAGGAACGTTTTCACTCAATTTTCTTCAGCTTCCCGATATCCGACGGTAGTGTNNNNNAGCCATTTTGACTACCT	69871278	69871422	-	0	10
INF1_smMIP_TEX11_30	X:69890156-69890307/19,21/-	0.913807	X	69890289	69890307	ACTGATGAAATGGATCTGG	1	69890156	69890176	GGCAGAGAGATAGATGCCATG	1	69890177	69890288	ACTTCACCAAGCTGCAGAGGAACATGGCTTGCTGTTACCTGAATTTGCAACAACTTGATAAGGTCCTTTGATTTATCTATTTTCAGAGGTAGCAAATGTTCTTATGTGCAGT	GGCAGAGAGATAGATGCCATGCTTCAGCTTCCCGATATCCGACGGTAGTGTNNNNNACTGATGAAATGGATCTGG	69890205	69890384	-	0	1
INF1_smMIP_TEX11_31	X:69890254-69890405/19,21/+	0.925389	X	69890254	69890272	ACAGCAAGCCATGTTCCTC	1	69890385	69890405	ACAAAATCACAGCGATGTCGC	1	69890273	69890384	TGCAGCTTGGTGAAGTCCAGATCCATTTCATCAGTTGAATAAAACCTCAGAGAATAATAGTACCATTGTAGGGCATCAGTGTAATTTTGTACCTAAAGTTTAAAAAGAAACA	ACAAAATCACAGCGATGTCGCCTTCAGCTTCCCGATATCCGACGGTAGTGTNNNNNACAGCAAGCCATGTTCCTC	69890205	69890384	+	0	1
INF1_smMIP_TEX11_32	X:69898589-69898740/19,21/-	0.925855	X	69898722	69898740	GCTCACCAAACAGGAAGAC	1	69898589	69898609	CAAAAAATAGTGCATTCACTA	1	69898610	69898721	AACTGACAGCAGAATCAATGAACTGGTTACACAACATTCTGTGGAGACAAGCTGCCAGTAGTTTTGAGGTTTGAGAATAATCTCTTTTTCATTCTTTATTTCTCCACTGCAA	CAAAAAATAGTGCATTCACTACTTCAGCTTCCCGATATCCGACGGTAGTGTNNNNNGCTCACCAAACAGGAAGAC	69898632	69898759	-	0	20
INF1_smMIP_TEX11_33	X:69898640-69898791/17,23/+	0.901075	X	69898640	69898656	GATTATTCTCAAACCTC	4	69898769	69898791	GAATCTCGGTCTATTGTCTCCCT	1	69898657	69898768	AAAACTACTGGCAGCTTGTCTCCACAGAATGTTGTGTAACCAGTTCATTGATTCTGCTGTCAGTTGTCTTCCTGTTTGGTGAGCTGAAAAAAAAAAAAAGCTCTGAAAATAA	GAATCTCGGTCTATTGTCTCCCTCTTCAGCTTCCCGATATCCGACGGTAGTGTNNNNNGATTATTCTCAAACCTC	69898632	69898759	+	0	1
INF1_smMIP_TEX11_34	X:69902419-69902570/19,21/-	0.871953	X	69902552	69902570	GAAGGAAGAACTTCTTGCC	1	69902419	69902439	GTCAATGGATTTCTTCCACTT	1	69902440	69902551	AAGGAGAAGATTGAAGAAATCTTTTTAGGTCAGTAGGATTTTCGCAAGTGTTTTAGAAACGTATTAATTTGTGTATAATTCTTAGATGTCAGAGTAATAGCAAAATCCTCAA	GTCAATGGATTTCTTCCACTTCTTCAGCTTCCCGATATCCGACGGTAGTGTNNNNNGAAGGAAGAACTTCTTGCC	69902502	69902695	-	0	1
INF1_smMIP_TEX11_35	X:69902526-69902677/16,24/-	0.875378	X	69902662	69902677	AGAGAATCTGTTGGGT	2	69902526	69902549	GGAGAAGATTGAAGAAATCTTTTT	1	69902550	69902661	TTCATTTCCTGACGATTATTCATGAACGTTTTAAGTCATCGGAAAATATTGGAAAAGTTCTGATACTCCATACTGACATGCTTTTACAAAGGAAGGAAGAACTTCTTGCCAA	GGAGAAGATTGAAGAAATCTTTTTCTTCAGCTTCCCGATATCCGACGGTAGTGTNNNNNAGAGAATCTGTTGGGT	69902502	69902695	-	0	10
INF1_smMIP_TEX11_36	X:69902560-69902711/16,24/+	0.88191	X	69902560	69902575	GTTCTTCCTTCCTTTG	7	69902688	69902711	ACACAATTTTAAGCAATGCGAACA	1	69902576	69902687	TAAAAGCATGTCAGTATGGAGTATCAGAACTTTTCCAATATTTTCCGATGACTTAAAACGTTCATGAATAATCGTCAGGAAATGAAACCCAACAGATTCTCTGTACAATGAG	ACACAATTTTAAGCAATGCGAACACTTCAGCTTCCCGATATCCGACGGTAGTGTNNNNNGTTCTTCCTTCCTTTG	69902502	69902695	+	0	1
INF1_smMIP_TEX11_37	X:69902649-69902800/18,22/+	0.913618	X	69902649	69902666	GTCAGGAAATGAAACCCA	1	69902779	69902800	GCATATCTGAACTCAGGTAATG	1	69902667	69902778	ACAGATTCTCTGTACAATGAGACACAATTTTAAGCAATGCGAACAGAAAAACTGGTTATTGATCAATGGGACTAAAATGTATTTCAGTGTGAGCAAAATAAGCCAGATAAAA	GCATATCTGAACTCAGGTAATGCTTCAGCTTCCCGATATCCGACGGTAGTGTNNNNNGTCAGGAAATGAAACCCA	69902502	69902695	+	0	1
INF1_smMIP_TEX11_38	X:69942408-69942559/22,18/-	0.911776	X	69942538	69942559	TTCATCTTGTTAGCTGTCATGG	1	69942408	69942425	GGCTAGGCACCAGTGGCT	2	69942426	69942537	AAATACTACATCTTGACATGCCCTTAGACTTCTGTCTGAACATTGCTAAACTGCTGATGGATCATGAAAGGTACAGAATTGATTTCCCTTTCTCTAAAGACTGACAGTTTTT	GGCTAGGCACCAGTGGCTCTTCAGCTTCCCGATATCCGACGGTAGTGTNNNNNTTCATCTTGTTAGCTGTCATGG	69942446	69942566	-	0	1
INF1_smMIP_TEX11_39	X:69942510-69942661/17,23/-	0.851232	X	69942645	69942661	CATGGTATATGGCAAAC	1	69942510	69942532	CTACATCTTGACATGCCCTTAGA	1	69942533	69942644	ATTTAGTAAGTAGATTTTGAATAGAGGAAAATTATTGAAAATAACTAAGCTTCCTCAAAAATTAAACTGATAATTATTTCATTTTTTCATCTTGTTAGCTGTCATGGAAATA	CTACATCTTGACATGCCCTTAGACTTCAGCTTCCCGATATCCGACGGTAGTGTNNNNNCATGGTATATGGCAAAC	69942446	69942566	-	0	1
INF1_smMIP_TEX11_40	X:69945034-69945185/21,19/-	0.582464	X	69945165	69945185	AAGTTCTCCTGGGCTTTTCTT	1	69945034	69945052	ATAAGATCTTTTGTAGTAT	1	69945053	69945164	AAAAATGAAAATCCTCTTGAAAGGCGAAACATCTAATGAAGAACTCCTTGAAGGTATGATCTCTGTATGTGAAGAGCACACCATTTTGAAACATCACTACAATTTGTTAAAT	ATAAGATCTTTTGTAGTATCTTCAGCTTCCCGATATCCGACGGTAGTGTNNNNNAAGTTCTCCTGGGCTTTTCTT	69945090	69945213	-	0	20
INF1_smMIP_TEX11_41	X:69945134-69945285/16,24/+	0.93102	X	69945134	69945149	TGTTTCGCCTTTCAAG	1	69945262	69945285	GCCTGCTTTATTCAACCACCTTGG	1	69945150	69945261	AGGATTTTCATTTTTAAGAAAAGCCCAGGAGAACTTAAATGTTCCTATTTTAAACAAAGAAATCACAATGATATTAAAATTGTGGAATGTAAAAGACAATTTTCAAGTAATT	GCCTGCTTTATTCAACCACCTTGGCTTCAGCTTCCCGATATCCGACGGTAGTGTNNNNNTGTTTCGCCTTTCAAG	69945090	69945213	+	0	1
INF1_smMIP_TEX11_42	X:69960465-69960616/22,18/-	0.853693	X	69960595	69960616	TATTTGGATTGGGATGACACCA	1	69960465	69960482	CAGTTTAGACATTTGCTT	2	69960483	69960594	AATATTATGATAAGGCTCTCAATGCTGTAAACCTAGCAAACAAGGTATGGGGCTTGTATTTTTGAATACTAACTTAATGTATTTTTTGAAGTCTTGATCACATTTTGAAATC	CAGTTTAGACATTTGCTTCTTCAGCTTCCCGATATCCGACGGTAGTGTNNNNNTATTTGGATTGGGATGACACCA	69960529	69960666	-	0	1
INF1_smMIP_TEX11_43	X:69960562-69960713/18,22/-	0.902931	X	69960696	69960713	TAGTCAGCTGTTGTATTG	1	69960562	69960583	AAGGCTCTCAATGCTGTAAACC	1	69960584	69960695	AAGTTTAACCATCAGATATGTGCTTTTTTTCTTTTTTTTTTTCTTACAGGCTAAAGTTCTACGGCTATTAGCCACGAATTATTTGGATTGGGATGACACCAAATATTATGAT	AAGGCTCTCAATGCTGTAAACCCTTCAGCTTCCCGATATCCGACGGTAGTGTNNNNNTAGTCAGCTGTTGTATTG	69960529	69960666	-	0	1
INF1_smMIP_TEX11_44	X:69963911-69964062/16,24/-	0.756075	X	69964047	69964062	TATGATATTGGGAAGA	3	69963911	69963934	CCCCATTTATGAGTAGATTAGCTA	1	69963935	69964046	TGGATAAGAAATCTACTGGGCCAGAAATGCTGGTAAGGATCATGTTAAATATTGTAGAAATAGGTTGAATAACCTGCTTTATTTTATTGTTATAAAATTATAATAGCGTACT	CCCCATTTATGAGTAGATTAGCTACTTCAGCTTCCCGATATCCGACGGTAGTGTNNNNNTATGATATTGGGAAGA	69963993	69964089	-	0	1
INF1_smMIP_TEX11_45	X:69964024-69964175/19,21/-	0.235709	X	69964157	69964175	TTATACCATGTCTTCTTAG	1	69964024	69964044	GATAAGAAATCTACTGGGCCA	1	69964045	69964156	TAATATATAATCTTGAAAATTATATATAATTTGAAATGGATATATGTTTATATATATATATATATTTTTTTTCCTTTTTAATGATAGCCAAAGCTATGATATTGGGAAGATG	GATAAGAAATCTACTGGGCCACTTCAGCTTCCCGATATCCGACGGTAGTGTNNNNNTTATACCATGTCTTCTTAG	69963993	69964089	-	0	1
INF1_smMIP_TEX11_46	X:70026458-70026609/21,19/-	0.846163	X	70026589	70026609	TTGGAGTAGAAACCCAGAAGA	1	70026458	70026476	GGCAGTTTAAACCTTCTCT	1	70026477	70026588	ATAATAAATATGAAGAAAGTTCTTTCTGGCTTAGGTAACATAAACAAAAAACTGAATGTAAACTCGGGAATATTATCATAGATGTCAGTTAATATTTACTGTAGAGTACTTT	GGCAGTTTAAACCTTCTCTCTTCAGCTTCCCGATATCCGACGGTAGTGTNNNNNTTGGAGTAGAAACCCAGAAGA	70026533	70026660	-	0	1
INF1_smMIP_TEX11_47	X:70026553-70026704/17,23/+	0.916114	X	70026553	70026569	ACCTAAGCCAGAAAGAA	2	70026682	70026704	AATCCCAACACACTTTGGGAGGC	3	70026570	70026681	CTTTCTTCATATTTATTATTCTTCTGGGTTTCTACTCCAAAGTTGTAACAGAGATGATGAAGACTTGAAGTCTGCAATATAAAAAAAATGCATTAGATTCATGATTTCCTTA	AATCCCAACACACTTTGGGAGGCCTTCAGCTTCCCGATATCCGACGGTAGTGTNNNNNACCTAAGCCAGAAAGAA	70026533	70026660	+	0	1
INF1_smMIP_TEX11_48	X:70053295-70053446/21,19/+	0.912824	X	70053295	70053315	GTAATGATTCTTCCTGGAACT	1	70053428	70053446	CCCCTTGAGCAACTGCCTG	1	70053316	70053427	TGATATAGCATATTTTCAAACTCTTGGAGAATGCAGACTTCACTCACCATCTGGGGGAGCCTCATCAACATATCTTTACATTGCAGTACACACATAGATGCTCTTTGAAAAT	CCCCTTGAGCAACTGCCTGCTTCAGCTTCCCGATATCCGACGGTAGTGTNNNNNGTAATGATTCTTCCTGGAACT	70053341	70053463	+	0	1
INF1_smMIP_TEX11_49	X:70053349-70053500/18,22/-	0.85752	X	70053483	70053500	TAGAGACAAATAACCTTG	1	70053349	70053370	CCCAGATGGTGAGTGAAGTCTG	1	70053371	70053482	TCATTTTAACCAATTATTGACATTCTTTATCTTTTTCAGGCAGTTGCTCAAGGGGATTTTCAAAGAGCATCTATGTGTGTACTGCAATGTAAAGATATGTTGATGAGGCTCC	CCCAGATGGTGAGTGAAGTCTGCTTCAGCTTCCCGATATCCGACGGTAGTGTNNNNNTAGAGACAAATAACCTTG	70053341	70053463	-	0	1
INF1_smMIP_TEX11_50	X:70072818-70072969/16,24/-	0.889646	X	70072954	70072969	GGAGCTCCCCTGAGGC	1	70072818	70072841	CATATGTAAAAGTAAAAGTGATGA	1	70072842	70072953	TGACTTGACCATGGAGAAGATTACTGTTGAGAGTGACCACTTCAGAGTGCTTTCTTACCAAGCAGAGTCAGTAGGTATCGTGGGCACCAGGGTCTTCCAGTGGGGCATTTTC	CATATGTAAAAGTAAAAGTGATGACTTCAGCTTCCCGATATCCGACGGTAGTGTNNNNNGGAGCTCCCCTGAGGC	70072862	70073198	-	0	1
INF1_smMIP_TEX11_51	X:70072938-70073089/16,24/+	0.859201	X	70072938	70072953	CTCCATGGTCAAGTCA	3	70073066	70073089	ATTGCCTCAGCTAAAAGTCAATGG	1	70072954	70073065	GCCTCAGGGGAGCTCCTTTGAATTAATTTGACGTATAATTGCTCCAGACTCTGGAAAATAAACCCACAGTACAATGTAACAATGAGAATAACCACAGATGTTACTACTAATA	ATTGCCTCAGCTAAAAGTCAATGGCTTCAGCTTCCCGATATCCGACGGTAGTGTNNNNNCTCCATGGTCAAGTCA	70072862	70073198	+	0	1
INF1_smMIP_TEX11_52	X:70073012-70073163/17,23/+	0.910144	X	70073012	70073028	TAAACCCACAGTACAAT	1	70073141	70073163	CCAGCATCCAACCATTCTTTTCC	1	70073029	70073140	GTAACAATGAGAATAACCACAGATGTTACTACTAATAATTGCCTCAGCTAAAAGTCAATGGTAACTTACGGCCACAGCAGCTTGAAAACATTCATCAGCGATTAGAAAATTT	CCAGCATCCAACCATTCTTTTCCCTTCAGCTTCCCGATATCCGACGGTAGTGTNNNNNTAAACCCACAGTACAAT	70072862	70073198	+	0	1
INF1_smMIP_TEX11_53	X:70073082-70073233/20,20/-	0.909735	X	70073214	70073233	CAATTTGGGGGAGGTATGAA	1	70073082	70073101	GGCCGTAAGTTACCATTGAC	1	70073102	70073213	TTTTTAAAAATTATTTTCTAATTTCTCTCTTCTAGATGAATATGAGAATAGGAAAAGAATGGTTGGATGCTGGAAATTTTCTAATCGCTGATGAATGTTTTCAAGCTGCTGT	GGCCGTAAGTTACCATTGACCTTCAGCTTCCCGATATCCGACGGTAGTGTNNNNNCAATTTGGGGGAGGTATGAA	70072862	70073198	-	0	1
INF1_smMIP_TEX11_54	X:70080628-70080779/22,18/-	0.866139	X	70080758	70080779	TGTTGCTTGCAAGTTGCTGAGT	1	70080628	70080645	GGTAAAGTTAGTGTGAAA	2	70080646	70080757	ATGTGTGAAGCCTCATTTGCCTCAGAACAAAGTATTCAACGACTGATTATGGTAAGTCTTAATTTAGGAGAAAGTGGAGATGAAATGAGATGGTTGTTACTTCTATGAAAAT	GGTAAAGTTAGTGTGAAACTTCAGCTTCCCGATATCCGACGGTAGTGTNNNNNTGTTGCTTGCAAGTTGCTGAGT	70080685	70080806	-	0	10
INF1_smMIP_TEX11_55	X:70080730-70080881/18,22/+	0.919731	X	70080730	70080747	GTTCTGAGGCAAATGAGG	1	70080860	70080881	CAATTGAAGGAAGCCAGTTTTG	1	70080748	70080859	CTTCACACATACTCAGCAACTTGCAAGCAACATAATGTACTGCAAAACAGTAATTAGACAATGATAAACACAAAACATTCATTCTCCTTTTATATACACCAAAGAGAAAAGA	CAATTGAAGGAAGCCAGTTTTGCTTCAGCTTCCCGATATCCGACGGTAGTGTNNNNNGTTCTGAGGCAAATGAGG	70080685	70080806	+	0	1
INF1_smMIP_TEX11_56	X:70092987-70093138/16,24/-	0.826087	X	70093123	70093138	ACCTATGGAACTGGGC	1	70092987	70093010	CCTGCAGTTTAAATAATGTTTTGA	1	70093011	70093122	ACTTACCATAGGAGGAGGTTGGCTTGTAAATGAAGAGCAGAAAATTAGATGTATGTATACATATTGTGACATGTATTATGAGGCGTGTTCTTACTATATATTGGGTAGTATT	CCTGCAGTTTAAATAATGTTTTGACTTCAGCTTCCCGATATCCGACGGTAGTGTNNNNNACCTATGGAACTGGGC	70093051	70093177	-	0	1
INF1_smMIP_TEX11_57	X:70093097-70093248/16,24/-	0.874478	X	70093233	70093248	AGTTACATAAGCATAC	2	70093097	70093120	TTACCATAGGAGGAGGTTGGCTTG	1	70093121	70093232	AACATTCAAGAATGAAAATACCGTTGGAGGTGGCCAGTATTTTAACTAACTAAGGAAATGTTTCTCTTTGACCAGATTGAAGAAATGGCAGTAAACCTATGGAACTGGGCAC	TTACCATAGGAGGAGGTTGGCTTGCTTCAGCTTCCCGATATCCGACGGTAGTGTNNNNNAGTTACATAAGCATAC	70093051	70093177	-	0	1
INF1_smMIP_TEX11_58	X:70099777-70099928/21,19/-	0.881494	X	70099908	70099928	TTCACCTAACATACCAGAGGC	1	70099777	70099795	TCTTCATTTTAACCAATGT	1	70099796	70099907	AATTGATAGACTCTTCAGCGACATAGCAAATATCAACAGGGAGTCTATGGCTGAAATAACAGACATTCAGGTTAGTATAAAAATAATTCTGTTTATGATAAGTTTCGATGAT	TCTTCATTTTAACCAATGTCTTCAGCTTCCCGATATCCGACGGTAGTGTNNNNNTTCACCTAACATACCAGAGGC	70099816	70099979	-	0	20
INF1_smMIP_TEX11_59	X:70099855-70100006/17,23/+	0.913552	X	70099855	70099871	CAGCCATAGACTCCCTG	1	70099984	70100006	GTGCTGTGAACTATTACCATTGG	1	70099872	70099983	TTGATATTTGCTATGTCGCTGAAGAGTCTATCAATTGCCTCTGGTATGTTAGGTGAATTATCATTTGTAACCAGGTTTTCAACAACTTCTGAAATGACAATGGATGATAAAT	GTGCTGTGAACTATTACCATTGGCTTCAGCTTCCCGATATCCGACGGTAGTGTNNNNNCAGCCATAGACTCCCTG	70099816	70099979	+	0	1
INF1_smMIP_TEX11_60	X:70117265-70117416/16,24/-	0.995128	X	70117401	70117416	CCAGGCTGGAGTGCAG	316656	70117265	70117288	TTTGTATTTTTAGTAGAGACGGGG	89631	70117289	70117400	TGGCATGATCTCGGCTCACTGCAACCTCCGCCTCCTGTGTTCAAGCGATTCTTCTGCCTCAGCCTCCCAAGTAGCTGGGACTACAGGTGCATGCCACTACGCCCAGCTAATT	TTTGTATTTTTAGTAGAGACGGGGCTTCAGCTTCCCGATATCCGACGGTAGTGTNNNNNCCAGGCTGGAGTGCAG	70117293	70117416	-	0	0
INF1_smMIP_TEX11_61	X:70117290-70117441/19,21/-	0.911377	X	70117423	70117441	CTTAGATGGAGTCTGTCTC	1	70117290	70117310	ATGCCACTACGCCCAGCTAAT	89	70117311	70117422	TGTTGTCCAGGCTGGAGTGCAGTGGCATGATCTCGGCTCACTGCAACCTCCGCCTCCTGTGTTCAAGCGATTCTTCTGCCTCAGCCTCCCAAGTAGCTGGGACTACAGGTGC	ATGCCACTACGCCCAGCTAATCTTCAGCTTCCCGATATCCGACGGTAGTGTNNNNNCTTAGATGGAGTCTGTCTC	70117293	70117416	-	0	10
INF1_smMIP_TEX11_62	X:70127550-70127701/16,24/-	0.769566	X	70127686	70127701	GAGGATAAAACAGAGT	5	70127550	70127573	AGTGTCAAACTGCTGCTTTAAGAT	1	70127574	70127685	ATTAAAATATGTTATTATTTCACAGGCTTGAGCCAGAGATTTAAAAATGGACAATGATGATTTTTTTTCCATGGACTTTAAAGGTACGTAGCTCTACGTGGTAGTACAAAAT	AGTGTCAAACTGCTGCTTTAAGATCTTCAGCTTCCCGATATCCGACGGTAGTGTNNNNNGAGGATAAAACAGAGT	70127581	70127659	-	0	1
INF1_smMIP_USP9Y_1	Y:14821338-14821489/18,22/-	0.90667	Y	14821472	14821489	GTCTTACTCCTACCTGGT	1	14821338	14821359	TGCTCTTTTTTCTTTTTTTTGT	1	14821360	14821471	TCTGTTGGAAGAGATGCTGAGACTGGCCATCAAGAACCTGGCCCTGGCTGTCGTTCCCTCCTACTGGAGAGCCATGAGTGATGGCTGTCATACTTGACACAGCACAGATCTT	TGCTCTTTTTTCTTTTTTTTGTCTTCAGCTTCCCGATATCCGACGGTAGTGTNNNNNGTCTTACTCCTACCTGGT	14821359	14821496	-	0	1
INF1_smMIP_USP9Y_2	Y:14821431-14821582/17,23/-	0.892213	Y	14821566	14821582	TAACTTAAAATAACCAC	2	14821431	14821453	GAGACTGGCCATCAAGAACCTGG	1	14821454	14821565	ATATTTTATGATTACTTTACAAATCATTCAGGACATGTTTCACAATTTTGTATTTCACAGTACTCAAAACAACACAGTCTTACTCCTACCTGGTTCTGTTGGAAGAGATGCT	GAGACTGGCCATCAAGAACCTGGCTTCAGCTTCCCGATATCCGACGGTAGTGTNNNNNTAACTTAAAATAACCAC	14821359	14821496	-	0	1
INF1_smMIP_USP9Y_3	Y:14832469-14832620/16,24/-	0.884962	Y	14832605	14832620	CTCTTCATCTTCATGC	9	14832469	14832492	AAACCACAGATTAAGGAAAAATAT	1	14832493	14832604	TGTGGTGGGGCATCACCTTGCCCTTGTTCCTCTGGAGGAGGAGTTGCTACGGAATTCTCATTGGAAGAATCAGGTGATGAAGTCTTAATTAAAAATTAAATATTCCAAATTT	AAACCACAGATTAAGGAAAAATATCTTCAGCTTCCCGATATCCGACGGTAGTGTNNNNNCTCTTCATCTTCATGC	14832500	14832690	-	0	1
INF1_smMIP_USP9Y_4	Y:14832569-14832720/17,23/-	0.90984	Y	14832704	14832720	CTTTTCTAGTTTACTGC	2	14832569	14832591	CACCTTGCCCTTGTTCCTCTGGA	1	14832592	14832703	ATCCATTAATAAAACAAATCCAAACAAATGCACCTGTTGATCATGTCATCCAGGTTTGCCAGCTCAGTATGTGGAAATGCAGGCTCTTCATCTTCATGCTGTGGTGGGGCAT	CACCTTGCCCTTGTTCCTCTGGACTTCAGCTTCCCGATATCCGACGGTAGTGTNNNNNCTTTTCTAGTTTACTGC	14832500	14832690	-	0	1
INF1_smMIP_USP9Y_5	Y:14833920-14834071/18,22/-	0.863431	Y	14834054	14834071	TTTTGGCAAAACAGGAAC	1	14833920	14833941	TGAGAAATTCTGCCTATATTAT	1	14833942	14834053	CACCCATCGAGGCCTAAGGATTATTATAAAACAAAAAGAGGCTTTACTGGTTTCATAGTAAAGGAACACTATAAATAAGTTACCTACCATAGTTACTGTTACTATGAAAAAG	TGAGAAATTCTGCCTATATTATCTTCAGCTTCCCGATATCCGACGGTAGTGTNNNNNTTTTGGCAAAACAGGAAC	14834019	14834140	-	0	1
INF1_smMIP_USP9Y_6	Y:14834032-14834183/18,22/-	0.894491	Y	14834166	14834183	TTAAGAACAAGGTGTAAG	1	14834032	14834053	CACCCATCGAGGCCTAAGGATT	1	14834054	14834165	TATATATAGGAGCACGTATTATAGAAAATGTACATCCACACTCACCTTTTACACTAAGATCAATAGCAGCTTCTAAAAGCACTTCTAATTCCCCTTTTGGCAAAACAGGAAC	CACCCATCGAGGCCTAAGGATTCTTCAGCTTCCCGATATCCGACGGTAGTGTNNNNNTTAAGAACAAGGTGTAAG	14834019	14834140	-	0	1
INF1_smMIP_USP9Y_7	Y:14836990-14837141/19,21/-	0.893762	Y	14837123	14837141	AGCCACTCACAGCCTCATC	1	14836990	14837010	AATTATTTGGCCAATTATGAT	1	14837011	14837122	CATAAGAATTTTAGTGAAAGATATTGTTAGTCCATCTCGAAAAAAACGTTGGCATGCTTCACTTTTAACATCAAGGCCTAAAAAACGAGCCAAACAAAGAATGTTTAAAAAA	AATTATTTGGCCAATTATGATCTTCAGCTTCCCGATATCCGACGGTAGTGTNNNNNAGCCACTCACAGCCTCATC	14837024	14837178	-	0	1
INF1_smMIP_USP9Y_8	Y:14837059-14837210/18,22/+	0.916795	Y	14837059	14837076	AAGTGAAGCATGCCAACG	1	14837189	14837210	GATTTACATGGTGATTCCTGTG	1	14837077	14837188	TTTTTTTCGAGATGGACTAACAATATCTTTCACTAAAATTCTTATGGATGAGGCTGTGAGTGGCTGGAAGTTTGAAATTCATGTGAGTCTTGTATTTCATTTCTGGGACTCA	GATTTACATGGTGATTCCTGTGCTTCAGCTTCCCGATATCCGACGGTAGTGTNNNNNAAGTGAAGCATGCCAACG	14837024	14837178	+	0	1
INF1_smMIP_USP9Y_9	Y:14838454-14838605/17,23/+	0.830856	Y	14838454	14838470	GAAATTGCAATGTGTTC	1	14838583	14838605	CTAGAACTTCTCGCCATGGCCTT	1	14838471	14838582	TTATTATAAACTGTATCATATCCTATCCATGTAACAGAGATGTATTATTAACAATACTCATCGCCTAGTGGAGCTTTGTGTGGCCAAGTTGTCCCAAGATTGGTTTCCACTT	CTAGAACTTCTCGCCATGGCCTTCTTCAGCTTCCCGATATCCGACGGTAGTGTNNNNNGAAATTGCAATGTGTTC	14838486	14838746	+	0	1
INF1_smMIP_USP9Y_10	Y:14838489-14838640/16,24/-	0.845225	Y	14838625	14838640	TACCATTGTAGATATG	3	14838489	14838512	CATCTCTGTTACATGGATAGGATA	1	14838513	14838624	AAACTTGCAGTGAGGATTTAAGGCCATGGCGAGAAGTTCTAGAAGTGGAAACCAATCTTGGGACAACTTGGCCACACAAAGCTCCACTAGGCGATGAGTATTGTTAATAATA	CATCTCTGTTACATGGATAGGATACTTCAGCTTCCCGATATCCGACGGTAGTGTNNNNNTACCATTGTAGATATG	14838486	14838746	-	0	10
INF1_smMIP_USP9Y_11	Y:14838598-14838749/21,19/-	0.922004	Y	14838729	14838749	TTGAAAATAACAAACCAACGC	1	14838598	14838616	AGTGAGGATTTAAGGCCAT	2	14838617	14838728	ACTTTTGGTGATCGAGGATCTGAAGAACGAGCAAATAATTCATCTTCAGGCAACTGAGCATTTGAGGAAATTAATTCACACGGACGTGTACCATTGTAGATATGAAACTTGC	AGTGAGGATTTAAGGCCATCTTCAGCTTCCCGATATCCGACGGTAGTGTNNNNNTTGAAAATAACAAACCAACGC	14838486	14838746	-	0	1
INF1_smMIP_USP9Y_12	Y:14838663-14838814/21,19/-	0.873353	Y	14838794	14838814	TTAAAGACAGGTTCACATCAC	1	14838663	14838681	AGGCAACTGAGCATTTGAG	1	14838682	14838793	TAATGGTCTGTGGCAAATGCAAATAAAAAAATTAATATTTAATCTTGAAAATAACAAACCAACGCACTTTTGGTGATCGAGGATCTGAAGAACGAGCAAATAATTCATCTTC	AGGCAACTGAGCATTTGAGCTTCAGCTTCCCGATATCCGACGGTAGTGTNNNNNTTAAAGACAGGTTCACATCAC	14838486	14838746	-	0	1
INF1_smMIP_USP9Y_13	Y:14847460-14847611/16,24/+	0.833533	Y	14847460	14847475	CTAGTATGCTTCACAC	1	14847588	14847611	GGGTTCCAGATTTTGCATGATCGT	2	14847476	14847587	AAATGCGTTTCAAATAGTAACTTTTTTTCTGAAAGGGGGGAATTAATTTTTATTATTAACTGTATTACAGGGTTGGCTAGTGGATCTCATCAATAAATTTGGCACATTAAAT	GGGTTCCAGATTTTGCATGATCGTCTTCAGCTTCCCGATATCCGACGGTAGTGTNNNNNCTAGTATGCTTCACAC	14847524	14847681	+	0	1
INF1_smMIP_USP9Y_14	Y:14847533-14847684/19,21/-	0.556856	Y	14847666	14847684	ACAAACATGAAAACATAAC	2	14847533	14847553	AGCCAACCCTGTAATACAGTT	1	14847554	14847665	TTACTTAATAAGAGCTGCAATTATTTGAATATTTAATGCTGATCCATTAAAAAAACGATCATGCAAAATCTGGAACCCATTTAATGTGCCAAATTTATTGATGAGATCCACT	AGCCAACCCTGTAATACAGTTCTTCAGCTTCCCGATATCCGACGGTAGTGTNNNNNACAAACATGAAAACATAAC	14847524	14847681	-	0	1
INF1_smMIP_USP9Y_15	Y:14847583-14847734/18,22/-	0.559238	Y	14847717	14847734	ACATAACTTAATAAGAGC	1	14847583	14847604	TGCAAAATCTGGAACCCATTTA	2	14847605	14847716	TGCAATTATTTGAACAAACATGAAATTATTTAACAAACATGAAAACATAACTTACTTAATAAGAGCTGCAATTATTTGAATATTTAATGCTGATCCATTAAAAAAACGATCA	TGCAAAATCTGGAACCCATTTACTTCAGCTTCCCGATATCCGACGGTAGTGTNNNNNACATAACTTAATAAGAGC	14847524	14847681	-	0	1
INF1_smMIP_USP9Y_16	Y:14847893-14848044/17,23/+	0.60124	Y	14847893	14847909	CATGAATGTTACAGAGG	1	14848022	14848044	AAACTTAACTGATGAAGAACTGA	2	14847910	14848021	TTTTGTGTCCTTCGTATTTCAGACCATTTGGACAATGCTATGAGTTTCTCAGTCAACATACACTGAAAAAGTACTTCATTCCAGTTATAGAAATAGTTCCACATTTATTGGA	AAACTTAACTGATGAAGAACTGACTTCAGCTTCCCGATATCCGACGGTAGTGTNNNNNCATGAATGTTACAGAGG	14847910	14848203	+	0	1
INF1_smMIP_USP9Y_17	Y:14847931-14848082/17,23/-	0.865872	Y	14848066	14848082	AAGGGCATCATTTTTGG	1	14847931	14847953	CTCATAGCATTGTCCAAATGGTC	1	14847954	14848065	CTTCATTCTTTGCCTCCTTTTTCAGTTCTTCATCAGTTAAGTTTTCCAATAAATGTGGAACTATTTCTATAACTGGAATGAAGTACTTTTTCAGTGTATGTTGACTGAGAAA	CTCATAGCATTGTCCAAATGGTCCTTCAGCTTCCCGATATCCGACGGTAGTGTNNNNNAAGGGCATCATTTTTGG	14847910	14848203	-	0	1
INF1_smMIP_USP9Y_18	Y:14848043-14848194/17,23/-	0.827009	Y	14848178	14848194	AAATATCTTACCTGAGT	1	14848043	14848065	CTTCATTCTTTGCCTCCTTTTTC	1	14848066	14848177	ATCATCTTTAACCTAAAAATTTCCAAATTTTTTATAGTCTCATCTTGTCCTGAAATTCTTGAAGCTAAGTTCTTCAAAGATTTAATAATCATTGAAAGGGCATCATTTTTGG	CTTCATTCTTTGCCTCCTTTTTCCTTCAGCTTCCCGATATCCGACGGTAGTGTNNNNNAAATATCTTACCTGAGT	14847910	14848203	-	0	1
INF1_smMIP_USP9Y_19	Y:14848121-14848272/16,24/-	0.588761	Y	14848257	14848272	GAGGAAATTTACAACC	1	14848121	14848144	ATAGTCTCATCTTGTCCTGAAATT	1	14848145	14848256	ATAAATGAGAGAAATTTGGAGTAAATGTTATATCAGAATTCACACAAATAATTTAAGGTGGAAAATATCTTACCTGAGTATCATCTTTAACCTAAAAATTTCCAAATTTTTT	ATAGTCTCATCTTGTCCTGAAATTCTTCAGCTTCCCGATATCCGACGGTAGTGTNNNNNGAGGAAATTTACAACC	14847910	14848203	-	0	1
INF1_smMIP_USP9Y_20	Y:14848299-14848450/18,22/-	0.642854	Y	14848433	14848450	CTCAGGATTACTATGCCG	1	14848299	14848320	GTTATAACCTTATTTATTTCAT	1	14848321	14848432	ATGAGTATAATATGATACACTAGATATAACCTTATTTATTTCATTCAGTGCATTCATCTTTCCATTAAAAGAGGAAATTTGCAACAATCTATGAGAAAAATTTGGAGTAAAT	GTTATAACCTTATTTATTTCATCTTCAGCTTCCCGATATCCGACGGTAGTGTNNNNNCTCAGGATTACTATGCCG	14848323	14848503	-	0	20
INF1_smMIP_USP9Y_21	Y:14848372-14848523/17,23/-	0.775232	Y	14848507	14848523	AGCAGTGTCTTATTCAC	1	14848372	14848394	TTTCATTCAGTGCATTCATCTTT	2	14848395	14848506	AATAAAAGATTTAAGAGGCTTACTGCCATTCGCTCAGCTGTCAGCCATTCTTCCTCCTCAGGATTACTATGCCGATGAGTATAATATGATACACTAGATATAACCTTATTTA	TTTCATTCAGTGCATTCATCTTTCTTCAGCTTCCCGATATCCGACGGTAGTGTNNNNNAGCAGTGTCTTATTCAC	14848323	14848503	-	0	1
INF1_smMIP_USP9Y_22	Y:14850001-14850152/16,24/-	0.656586	Y	14850137	14850152	TGTGGTTGATGAAGAC	3	14850001	14850024	CATGTCTCCAACTTCTAAATAATA	1	14850025	14850136	TGTCTTGCAAGACTATGGATAAGATATTATTTTGCTGTATCCATTCCTAAATGTAATACAAAAATTCAATGCTGAAACTAAAAAGAAATTTTTTTAAAAAGCGAAATAAAAA	CATGTCTCCAACTTCTAAATAATACTTCAGCTTCCCGATATCCGACGGTAGTGTNNNNNTGTGGTTGATGAAGAC	14850069	14850263	-	0	1
INF1_smMIP_USP9Y_23	Y:14850085-14850236/18,22/-	0.91105	Y	14850219	14850236	GCCCAGATATTATCAAGG	1	14850085	14850106	TTTGCTGTATCCATTCCTAAAT	1	14850107	14850218	TCCTGTAATGTAAGAGCCTTTTCTTTAATCACAAAACGAAGAATTTTCTCTAGCTTTTCTACATATTGTGGTTGATGAAGACTGTCTTGCAAGACTATGGATAAGATATTAT	TTTGCTGTATCCATTCCTAAATCTTCAGCTTCCCGATATCCGACGGTAGTGTNNNNNGCCCAGATATTATCAAGG	14850069	14850263	-	0	1
INF1_smMIP_USP9Y_24	Y:14850185-14850336/16,24/-	0.859256	Y	14850321	14850336	ATACTAAATTGCTGGC	1	14850185	14850208	TAAGAGCCTTTTCTTTAATCACAA	1	14850209	14850320	CATTATATAAGGGTTACCAAAAATTTTCTCCTTTTTGGTATCTTTCTTAGAAAATAGCTATCATCTCACTTTCTTACCTGTGCTGCCCAGATATTATCAAGGTCCTGTAATG	TAAGAGCCTTTTCTTTAATCACAACTTCAGCTTCCCGATATCCGACGGTAGTGTNNNNNATACTAAATTGCTGGC	14850069	14850263	-	0	1
INF1_smMIP_USP9Y_25	Y:14851355-14851506/18,22/-	0.711677	Y	14851489	14851506	TGCTAGCAGATCATGTAC	1	14851355	14851376	CTACTACAAGAATCTCCATTAC	1	14851377	14851488	ATTCTTCACAATGGCTTCATGTTTTCCTGCCTGTTGAAAAAACAAAAGTAGAATAAATAAAAGCAAAAAAAAAATTATAGTATACTTAAATTTTAATAACAAAAAAATAGTT	CTACTACAAGAATCTCCATTACCTTCAGCTTCCCGATATCCGACGGTAGTGTNNNNNTGCTAGCAGATCATGTAC	14851437	14851583	-	0	1
INF1_smMIP_USP9Y_26	Y:14851455-14851606/18,22/-	0.852802	Y	14851589	14851606	CAATATTTACTATTTGGC	6	14851455	14851476	GGCTTCATGTTTTCCTGCCTGT	1	14851477	14851588	AATACTTTACTATTCAAGCTACTACCTTAAAGCAATCAAAAAGATGATCAAGTTGTCCAGGAGAAAAATCCCAAGCCAACTTTGCTAGCAGATCATGTACATTCTTCACAAT	GGCTTCATGTTTTCCTGCCTGTCTTCAGCTTCCCGATATCCGACGGTAGTGTNNNNNCAATATTTACTATTTGGC	14851437	14851583	-	0	1
INF1_smMIP_USP9Y_27	Y:14869043-14869194/22,18/+	0.90592	Y	14869043	14869064	CAAAGACTTAAAGCAGTGGTTA	1	14869177	14869194	GCCGTCTTGCAGAAGATG	1	14869065	14869176	ATGTAAACAAACGTAATAAATTATGTGGTATTTATATCATTTAAATACTTTCTTTAGGCAAGTTGGACAAATGCAAGTAAAAAGCAACGTGAAAAGCTCCTTGAGTTGATAC	GCCGTCTTGCAGAAGATGCTTCAGCTTCCCGATATCCGACGGTAGTGTNNNNNCAAAGACTTAAAGCAGTGGTTA	14869100	14869348	+	0	1
INF1_smMIP_USP9Y_28	Y:14869145-14869296/19,21/-	0.900548	Y	14869278	14869296	GGGCACTAAGAGCAAGGTC	1	14869145	14869165	AGGAGCTTTTCACGTTGCTTT	1	14869166	14869277	CATGATGTCTACAGGCACATCATCACTCTGAGCCAGGTTCCAAAGAAGGTTCAACACTTTGTGTGCCATCACACCATCTTTATCATCTTCTGCAAGACGGCGTATCAACTCA	AGGAGCTTTTCACGTTGCTTTCTTCAGCTTCCCGATATCCGACGGTAGTGTNNNNNGGGCACTAAGAGCAAGGTC	14869100	14869348	-	0	1
INF1_smMIP_USP9Y_29	Y:14869225-14869376/18,22/-	0.891581	Y	14869359	14869376	TACTTGTGAAGGAAAGTC	1	14869225	14869246	GCCAGGTTCCAAAGAAGGTTCA	1	14869247	14869358	AGAAAACTGAACAAAGAAACACTCCCATACCTGGGAACAACTATAATCTAGTATTTTTATGTGGGCACTAAGAGCAAGGTCCATGATGTCTACAGGCACATCATCACTCTGA	GCCAGGTTCCAAAGAAGGTTCACTTCAGCTTCCCGATATCCGACGGTAGTGTNNNNNTACTTGTGAAGGAAAGTC	14869100	14869348	-	0	1
INF1_smMIP_USP9Y_30	Y:14870364-14870515/20,20/+	0.763095	Y	14870364	14870383	CAAAATAATTTTGAAGGTAG	1	14870496	14870515	GACAAGTGGGTAATTCCTGC	1	14870384	14870495	AATTACATTGAGTATTGATCCACTTACAGTATAAATTTTTTTCATGTATAAGGATCGAGATGCACAGAAGATCCAGTGGATAGATCACTTTATAGAAGAACTTCGCACAAAT	GACAAGTGGGTAATTCCTGCCTTCAGCTTCCCGATATCCGACGGTAGTGTNNNNNCAAAATAATTTTGAAGGTAG	14870414	14870592	+	0	20
INF1_smMIP_USP9Y_31	Y:14870420-14870571/16,24/-	0.843801	Y	14870556	14870571	TCAAATTTTGAGATGC	4	14870420	14870443	TCTCGATCCTTATACATGAAAAAA	1	14870444	14870555	TTCACCAAACAAACTACAAATTTCTCTTATTTGTTTCAGAGCAGGAATTACCCACTTGTCATTTGTGCGAAGTTCTTCTATAAAGTGATCTATCCACTGGATCTTCTGTGCA	TCTCGATCCTTATACATGAAAAAACTTCAGCTTCCCGATATCCGACGGTAGTGTNNNNNTCAAATTTTGAGATGC	14870414	14870592	-	0	1
INF1_smMIP_USP9Y_32	Y:14870487-14870638/18,22/-	0.866719	Y	14870621	14870638	TCATACACCATTTCCAAC	1	14870487	14870508	TTACCCACTTGTCATTTGTGCG	1	14870509	14870620	ATAATATACAGATAAAAATAAGAAAATTCTCTATTAAAAAAGTCTTACCTCAAATTTTGAGATGCTTCACCAAACAAACTACAAATTTCTCTTATTTGTTTCAGAGCAGGAA	TTACCCACTTGTCATTTGTGCGCTTCAGCTTCCCGATATCCGACGGTAGTGTNNNNNTCATACACCATTTCCAAC	14870414	14870592	-	0	1
INF1_smMIP_USP9Y_33	Y:14872359-14872510/16,24/-	0.851411	Y	14872495	14872510	AAGGTTTTCTGCTACC	4	14872359	14872382	GGCACATGAAAATTGCTATAATTA	1	14872383	14872494	AAAGTAACTAAAGCATGATTTTGTTGAAGCTGGTTGATTAAATCATGGCGATAAAATATGTGGGGACTTCGCTGAGTTTGACTGAAATAAGAAGAACTTAACAGTATAATAA	GGCACATGAAAATTGCTATAATTACTTCAGCTTCCCGATATCCGACGGTAGTGTNNNNNAAGGTTTTCTGCTACC	14872392	14872567	-	0	1
INF1_smMIP_USP9Y_34	Y:14872443-14872594/19,21/-	0.870645	Y	14872576	14872594	AAAACAAAGTTGATTCCCC	1	14872443	14872463	GGTTGATTAAATCATGGCGAT	1	14872464	14872575	ATAGTTAATTTTAGCTTATCATACATACCTCCAGCATACAATCTGATGCTATTCATGTAGGTTGCAAGGTTTTCTGCTACCAAAGTAACTAAAGCATGATTTTGTTGAAGCT	GGTTGATTAAATCATGGCGATCTTCAGCTTCCCGATATCCGACGGTAGTGTNNNNNAAAACAAAGTTGATTCCCC	14872392	14872567	-	0	1
INF1_smMIP_USP9Y_35	Y:14882938-14883089/16,24/-	0.753586	Y	14883074	14883089	CTAAGGAAGTTTAGTC	3	14882938	14882961	CCACAACATTATTGACTTAGGTAA	1	14882962	14883073	GTTCTTGAACTTCTTGAACATGACTGTATCGACTTCCAAGCCTCACTGTTTGTGGATCATAGTCTTCATGATCTGCAAATAAACCAAAATTATGCATTATACACATGTATAT	CCACAACATTATTGACTTAGGTAACTTCAGCTTCCCGATATCCGACGGTAGTGTNNNNNCTAAGGAAGTTTAGTC	14882980	14883109	-	0	1
INF1_smMIP_USP9Y_36	Y:14882994-14883145/17,23/+	0.904915	Y	14882994	14883010	ATTTGCAGATCATGAAG	1	14883123	14883145	GGCACTGCAGTGATAAGGAATGC	1	14883011	14883122	ACTATGATCCACAAACAGTGAGGCTTGGAAGTCGATACAGTCATGTTCAAGAAGTTCAAGAACGACTAAACTTCCTTAGGTTTGTTTTAAACCATCAGTGCTATTCTTTTAA	GGCACTGCAGTGATAAGGAATGCCTTCAGCTTCCCGATATCCGACGGTAGTGTNNNNNATTTGCAGATCATGAAG	14882980	14883109	+	0	1
INF1_smMIP_USP9Y_37	Y:14885459-14885610/18,22/-	0.912839	Y	14885593	14885610	ATCACAAAGATAAACTGC	1	14885459	14885480	AGTTTTTTCCTGCAAAGCAAGT	1	14885481	14885592	ATTTTCTGCTAAGCACTTCCATATTTGTTTTGCCTGAGGAGCACAGAGCCACAGTTGGCCATCCTTCAGTAAAAATCTTGGAGAAACATAAATCAGTAATTAGGGTCAACAT	AGTTTTTTCCTGCAAAGCAAGTCTTCAGCTTCCCGATATCCGACGGTAGTGTNNNNNATCACAAAGATAAACTGC	14885495	14885879	-	0	1
INF1_smMIP_USP9Y_38	Y:14885566-14885717/17,23/-	0.888992	Y	14885701	14885717	GGATCAAGCTGAAGTAC	1	14885566	14885588	TCTGCTAAGCACTTCCATATTTG	1	14885589	14885700	ATTACTTTCAAAGAAGTCCTTATTAATATCAGGATCCAAGTCTGGTTCATCCCCCATTAACTTGGAATACCACTTAAAACAGGCTTCACGATCACAAAGATAAACTGCATTT	TCTGCTAAGCACTTCCATATTTGCTTCAGCTTCCCGATATCCGACGGTAGTGTNNNNNGGATCAAGCTGAAGTAC	14885495	14885879	-	0	1
INF1_smMIP_USP9Y_39	Y:14885647-14885798/20,20/-	0.914676	Y	14885779	14885798	GCTATTAGTTTCCTTTCTCG	1	14885647	14885666	TCCAAGTCTGGTTCATCCCC	1	14885667	14885778	ACAATTGACAGCTTTGAAAAATCTTTCAAAGCATTTCATTCCATTTTCAGTTAAAAGGGAAGGATCAAGCTGAAGTACATTACTTTCAAAGAAGTCCTTATTAATATCAGGA	TCCAAGTCTGGTTCATCCCCCTTCAGCTTCCCGATATCCGACGGTAGTGTNNNNNGCTATTAGTTTCCTTTCTCG	14885495	14885879	-	0	1
INF1_smMIP_USP9Y_40	Y:14885751-14885902/16,24/-	0.835859	Y	14885887	14885902	CAGGTACAATGTTGGC	1	14885751	14885774	TTGACAGCTTTGAAAAATCTTTCA	1	14885775	14885886	ATATGAAAGTTCTTACTACTCACTTACCCTCCAAAGGTAGTCTAGTCCAATTAATTCCAAATCATCCATCATATAGGATCTTCTTTTTGCTATTAGTTTCCTTTCTCGACAA	TTGACAGCTTTGAAAAATCTTTCACTTCAGCTTCCCGATATCCGACGGTAGTGTNNNNNCAGGTACAATGTTGGC	14885495	14885879	-	0	1
INF1_smMIP_USP9Y_41	Y:14887357-14887508/17,23/-	0.806267	Y	14887492	14887508	ATTCTCACCTGATTGGC	1	14887357	14887379	AAAACCATTCAAGATACAGTTTA	1	14887380	14887491	TTTTAATCTTGGGCCAAGGTTTGTGTATATCTCTTTAAGAAGATCTATAGCTCTGTTAGCAATCTCGTCACTACTCTGAATCACAACCTGGTTCCAAAAATATTACAGTATT	AAAACCATTCAAGATACAGTTTACTTCAGCTTCCCGATATCCGACGGTAGTGTNNNNNATTCTCACCTGATTGGC	14887383	14887520	-	0	10
INF1_smMIP_USP9Y_42	Y:14887394-14887545/17,23/+	0.904983	Y	14887394	14887410	TTTGGAACCAGGTTGTG	2	14887523	14887545	AGATCCACAACAATTGGGTTAAG	1	14887411	14887522	ATTCAGAGTAGTGACGAGATTGCTAACAGAGCTATAGATCTTCTTAAAGAGATATACACAAACCTTGGCCCAAGATTAAAAGCCAATCAGGTGAGAATTGAAGTGCTTAAAA	AGATCCACAACAATTGGGTTAAGCTTCAGCTTCCCGATATCCGACGGTAGTGTNNNNNTTTGGAACCAGGTTGTG	14887383	14887520	+	0	1
INF1_smMIP_USP9Y_43	Y:14888444-14888595/17,23/-	0.806239	Y	14888579	14888595	CATGGATAACCACCTAT	2	14888444	14888466	ACCCAGTAGTAAAACACAAGTTT	1	14888467	14888578	AAATAATGGACAAATACAGATAATCCAGGTTGTTTACAAATGAAATGTGACATCAATCTAATAAAAAGCAGTAAAATGTCAATTTAAAGGTAACTCAATCATAGTCATATTT	ACCCAGTAGTAAAACACAAGTTTCTTCAGCTTCCCGATATCCGACGGTAGTGTNNNNNCATGGATAACCACCTAT	14888561	14888814	-	0	1
INF1_smMIP_USP9Y_44	Y:14888553-14888704/20,20/-	0.873918	Y	14888685	14888704	CGAATGGCTTCTTGTCTTGC	1	14888553	14888572	TGGACAAATACAGATAATCC	1	14888573	14888684	ACAATTAATGCTGTTTTTGTCACCATCAAAAACACACAGTGTATCATATGATGCTTTTAAACGATCAAAGCAAGACTGAATGAAGTCTTCATGGATAACCACCTATAAATAA	TGGACAAATACAGATAATCCCTTCAGCTTCCCGATATCCGACGGTAGTGTNNNNNCGAATGGCTTCTTGTCTTGC	14888561	14888814	-	0	20
INF1_smMIP_USP9Y_45	Y:14888664-14888815/18,22/+	0.90365	Y	14888664	14888681	GACAAAAACAGCATTAAT	1	14888794	14888815	GGTTTGTGTGAAGTTGATCTCT	1	14888682	14888793	TGTGCAAGACAAGAAGCCATTCGAATGGTTAGAGTATTAACTGTTATAAAAGAGTACATTAATGAATGTGACAGTGATTATCACAAGGAAAGAATGATTCTACCTATGTCGA	GGTTTGTGTGAAGTTGATCTCTCTTCAGCTTCCCGATATCCGACGGTAGTGTNNNNNGACAAAAACAGCATTAAT	14888561	14888814	+	0	1
INF1_smMIP_USP9Y_46	Y:14888753-14888904/22,18/-	0.843858	Y	14888883	14888904	ATAAGAATATCCCCCACTTTCC	1	14888753	14888770	TCCTTGTGATAATCACTG	1	14888771	14888882	TTTTAACCTATTATTACTTTCCTAAGTAAATTTCTAAGAAAATATTAAGTAATTGTAAATTAACACTAGAGATCAACTTCACACAAACCTCGACATAGGTAGAATCATTCTT	TCCTTGTGATAATCACTGCTTCAGCTTCCCGATATCCGACGGTAGTGTNNNNNATAAGAATATCCCCCACTTTCC	14888561	14888814	-	0	1
INF1_smMIP_USP9Y_47	Y:14889876-14890027/17,23/-	0.922967	Y	14890011	14890027	ATATCCAACTCATCAAC	1	14889876	14889898	GATATTCAGCAGACTGCTAAAAA	1	14889899	14890010	CTGTCTGCCCTGGTTTGGAAACCGAACTATAAGAGAGAGGTGTTTGCCACGAAATGCTCTGAAAAATAAATAAGTAAATAAAAAGAATTTTAAAAAAAGAAAAAACCACAAT	GATATTCAGCAGACTGCTAAAAACTTCAGCTTCCCGATATCCGACGGTAGTGTNNNNNATATCCAACTCATCAAC	14889931	14890213	-	0	1
INF1_smMIP_USP9Y_48	Y:14889989-14890140/22,18/+	0.921858	Y	14889989	14890010	GTTTCCAAACCAGGGCAGACAG	1	14890123	14890140	TGGGTGGTGAGCTGATAG	1	14890011	14890122	GTTGATGAGTTGGATATATGGTCTCATACGAATGACACAATTGGTTCAGTACGGCGATGTATTGTTAATCGTATTAAAGCCAATGTAGCCCACAAAAAAATTGAACTTTTTG	TGGGTGGTGAGCTGATAGCTTCAGCTTCCCGATATCCGACGGTAGTGTNNNNNGTTTCCAAACCAGGGCAGACAG	14889931	14890213	+	0	1
INF1_smMIP_USP9Y_49	Y:14890091-14890242/16,24/+	0.794002	Y	14890091	14890106	CAATGTAGCCCACAAA	3	14890219	14890242	GTCATGAAACTTAAATGTTGAGGC	1	14890107	14890218	AAAATTGAACTTTTTGTGGGTGGTGAGCTGATAGATTCTGAAGATGACAGAAAGCTAATTGGACAATTAAACTTAAAAGATAAATCTGTAAGTAAATACAGCTTTTAAATAA	GTCATGAAACTTAAATGTTGAGGCCTTCAGCTTCCCGATATCCGACGGTAGTGTNNNNNCAATGTAGCCCACAAA	14889931	14890213	+	0	20
INF1_smMIP_USP9Y_50	Y:14890105-14890256/16,24/-	0.883778	Y	14890241	14890256	GGCTTACTAATATAGC	1	14890105	14890128	CACCCACAAAAAGTTCAATTTTTT	1	14890129	14890240	CTCAACATTTAAGTTTCATGACTTATTTAAAAGCTGTATTTACTTACAGATTTATCTTTTAAGTTTAATTGTCCAATTAGCTTTCTGTCATCTTCAGAATCTATCAGCTCAC	CACCCACAAAAAGTTCAATTTTTTCTTCAGCTTCCCGATATCCGACGGTAGTGTNNNNNGGCTTACTAATATAGC	14889931	14890213	-	0	20
INF1_smMIP_USP9Y_51	Y:14890461-14890612/18,22/-	0.901402	Y	14890595	14890612	TTGAGGAATCGGAAGAGC	1	14890461	14890482	GGGAACTAGATACATTGAAAGG	1	14890483	14890594	TATCAGGACTTGATGGCATATTGAAATTTATTTGTGTAAGTTTGGCTGTAATTAGCTGAAAATAACAGTGTGTTTATTAGCAAAGACAAGGCAAAACATTTCTACAAGTAAT	GGGAACTAGATACATTGAAAGGCTTCAGCTTCCCGATATCCGACGGTAGTGTNNNNNTTGAGGAATCGGAAGAGC	14890518	14890709	-	0	1
INF1_smMIP_USP9Y_52	Y:14890549-14890700/20,20/-	0.935014	Y	14890681	14890700	GAATTACTCACCACCCCAGG	1	14890549	14890568	TTTATTTGTGTAAGTTTGGC	1	14890569	14890680	CAAACAACTTTCCACCTCTAGATTGGGACCATCATTGTAATGATTACGGTGGTTTCCAGGAGATGCAGTTGAGGAATCGGAAGAGCTATCAGGACTTGATGGCATATTGAAA	TTTATTTGTGTAAGTTTGGCCTTCAGCTTCCCGATATCCGACGGTAGTGTNNNNNGAATTACTCACCACCCCAGG	14890518	14890709	-	0	1
INF1_smMIP_USP9Y_53	Y:14890601-14890752/20,20/+	0.901306	Y	14890601	14890620	CCGATTCCTCAACTGCATCT	1	14890733	14890752	GTTCTTTTTCTGAGGAGCTT	1	14890621	14890732	CCTGGAAACCACCGTAATCATTACAATGATGGTCCCAATCTAGAGGTGGAAAGTTGTTTGCCTGGGGTGGTGAGTAATTCTCTATTCAAAATATGAAGAAATGTGTAGAATA	GTTCTTTTTCTGAGGAGCTTCTTCAGCTTCCCGATATCCGACGGTAGTGTNNNNNCCGATTCCTCAACTGCATCT	14890518	14890709	+	0	1
INF1_smMIP_USP9Y_54	Y:14891414-14891565/18,22/+	0.848685	Y	14891414	14891431	TGTAGCACAATTTGCAGG	1	14891544	14891565	GATGGAGCAAGAGTACTTATGA	2	14891432	14891543	TAAATATTTTGTATATTCTGTATTCTAGATAATGTCAGTGCATCCCAGATACATCTCTTTCCTTTGGCAAGTTGCAGACTTAGGTAGCAACCTGAATATGCCACCTCTTAGA	GATGGAGCAAGAGTACTTATGACTTCAGCTTCCCGATATCCGACGGTAGTGTNNNNNTGTAGCACAATTTGCAGG	14891438	14891600	+	0	1
INF1_smMIP_USP9Y_55	Y:14891466-14891617/17,23/-	0.902395	Y	14891601	14891617	CCTTTCTGTGGAATAGG	1	14891466	14891488	GAGATGTATCTGGGATGCACTGA	1	14891489	14891600	GGGATGGACCATTTTCTTACCTGGTGGCATAAGTTTCATAAGTACTCTTGCTCCATCTCTAAGAGGTGGCATATTCAGGTTGCTACCTAAGTCTGCAACTTGCCAAAGGAAA	GAGATGTATCTGGGATGCACTGACTTCAGCTTCCCGATATCCGACGGTAGTGTNNNNNCCTTTCTGTGGAATAGG	14891438	14891600	-	0	1
INF1_smMIP_USP9Y_56	Y:14898065-14898216/21,19/-	0.890045	Y	14898196	14898216	AAGGGGTGGACTAAGTTTGCC	1	14898065	14898083	TGTTTCACATTTGCCATTT	3	14898084	14898195	TTCTCCAAGTTTTGCATGGTCCAAACAAACAGCTCGTAATTTTTCTACAGCTGTTCTATCTGCAAAGGAAAAAGACACAGACTAAAATAAAGTGTAACTCATGTGTTATTAA	TGTTTCACATTTGCCATTTCTTCAGCTTCCCGATATCCGACGGTAGTGTNNNNNAAGGGGTGGACTAAGTTTGCC	14898115	14898287	-	0	10
INF1_smMIP_USP9Y_57	Y:14898175-14898326/19,21/-	0.851908	Y	14898308	14898326	GTGTTCTTCACATTACCGT	1	14898175	14898195	TTCTCCAAGTTTTGCATGGTC	1	14898196	14898307	ATAATATAAAAATTACATTTTTGCAAAGGCAAAAACCAACCTCTGTTAGGTATAGAACTTGGGAGGCAGAAGGACCAAAGAAAAGAGAGTCAAGGGGTGGACTAAGTTTGCC	TTCTCCAAGTTTTGCATGGTCCTTCAGCTTCCCGATATCCGACGGTAGTGTNNNNNGTGTTCTTCACATTACCGT	14898115	14898287	-	0	20
INF1_smMIP_USP9Y_58	Y:14898177-14898328/20,20/+	0.893753	Y	14898177	14898196	CCATGCAAAACTTGGAGAAG	1	14898309	14898328	CGGTAATGTGAAGAACACTG	1	14898197	14898308	GCAAACTTAGTCCACCCCTTGACTCTCTTTTCTTTGGTCCTTCTGCCTCCCAAGTTCTATACCTAACAGAGGTTGGTTTTTGCCTTTGCAAAAATGTAATTTTTATATTATA	CGGTAATGTGAAGAACACTGCTTCAGCTTCCCGATATCCGACGGTAGTGTNNNNNCCATGCAAAACTTGGAGAAG	14898115	14898287	+	0	1
INF1_smMIP_USP9Y_59	Y:14898404-14898555/16,24/-	0.830226	Y	14898540	14898555	AGTACAAGAGGTAAGC	3	14898404	14898427	TATTAAAAGGGATTTAAAAAAAAA	1	14898428	14898539	CACCACTTTTCAAGAAGTGAACTTGAAAGTCAGAGGACCCATCAGTTAGAGGCACACCAGCAGGCATTAACAAGGCATAAACTACCTGGAAAAAAAAAAAAAAAGGAGAGTA	TATTAAAAGGGATTTAAAAAAAAACTTCAGCTTCCCGATATCCGACGGTAGTGTNNNNNAGTACAAGAGGTAAGC	14898433	14898753	-	0	1
INF1_smMIP_USP9Y_60	Y:14898523-14898674/17,23/+	0.909486	Y	14898523	14898539	CTTCTTGAAAAGTGGTG	2	14898652	14898674	AACTGCGATTGGCTATGGCCATG	1	14898540	14898651	GCTTACCTCTTGTACTGAGTATGCTAATAAGAAATAACTTCTTGCCAAATACAGATATGGAAACTCGAAGGGGTGCTTATTTAAATGCTCTTAAAATAGCCAAACTGTTGTT	AACTGCGATTGGCTATGGCCATGCTTCAGCTTCCCGATATCCGACGGTAGTGTNNNNNCTTCTTGAAAAGTGGTG	14898433	14898753	+	0	1
INF1_smMIP_USP9Y_61	Y:14898589-14898740/22,18/-	0.798627	Y	14898719	14898740	TTATTACCTGTGTTATGGGGTC	1	14898589	14898606	CGAGTTTCCATATCTGTA	1	14898607	14898718	TGTACCATCTACAACTGGCTGACAAGCTTCTGCTACAGCTCGAACATGGCCATAGCCAATCGCAGTTAACAACAGTTTGGCTATTTTAAGAGCATTTAAATAAGCACCCCTT	CGAGTTTCCATATCTGTACTTCAGCTTCCCGATATCCGACGGTAGTGTNNNNNTTATTACCTGTGTTATGGGGTC	14898433	14898753	-	0	1
INF1_smMIP_USP9Y_62	Y:14898695-14898846/17,23/-	0.436601	Y	14898830	14898846	TCTACTTAAAAGTTTAC	2	14898695	14898717	GTACCATCTACAACTGGCTGACA	1	14898718	14898829	ATTTATTAAATAGTAATAATTAATAATTATTACAGAGTTTACATTTATTAAATAGTAAGGACTAAATATTTTTAAAAGTTTCTTAACATTTATTACCTGTGTTATGGGGTCT	GTACCATCTACAACTGGCTGACACTTCAGCTTCCCGATATCCGACGGTAGTGTNNNNNTCTACTTAAAAGTTTAC	14898433	14898753	-	0	1
INF1_smMIP_USP9Y_63	Y:14902283-14902434/16,24/+	0.837275	Y	14902283	14902298	AGGGATTATGGTATAT	3	14902411	14902434	CGAGTGCGTACTTAGAAATGAGTC	1	14902299	14902410	ACAGTTTTTTCATTTGACGTAAAATGATTCACTTTTTTCAGATTAACCAAGTTACTCATGATCAAGCAGTGGTGCTACAAAGTGCCCTTCAGAGCATTCCTAATCCCTCATC	CGAGTGCGTACTTAGAAATGAGTCCTTCAGCTTCCCGATATCCGACGGTAGTGTNNNNNAGGGATTATGGTATAT	14902318	14902485	+	0	1
INF1_smMIP_USP9Y_64	Y:14902355-14902506/19,21/+	0.910752	Y	14902355	14902373	CATGATCAAGCAGTGGTGC	2	14902486	14902506	GTTCTGGGATCTTGAATGATC	1	14902374	14902485	TACAAAGTGCCCTTCAGAGCATTCCTAATCCCTCATCCGAGTGCGTACTTAGAAATGAGTCCATACTTCTTGCTCAGGAAATATCTAATGAGGTTAGTATGAAAGTTAGACA	GTTCTGGGATCTTGAATGATCCTTCAGCTTCCCGATATCCGACGGTAGTGTNNNNNCATGATCAAGCAGTGGTGC	14902318	14902485	+	0	1
INF1_smMIP_USP9Y_65	Y:14903358-14903509/21,19/-	0.846105	Y	14903489	14903509	TAATGCCCCACATGCTGATGC	1	14903358	14903376	CAGGAAAACAAAATATTTC	1	14903377	14903488	CCAGATAATTTTCTGTATAGCCCTAATTACACAAATATCAGGCATATATCTTGAAGCCTGCAGAAAAGAAATAAATAATTAAAAGTGCTGGCAGAACATTAAAGTGAATAAT	CAGGAAAACAAAATATTTCCTTCAGCTTCCCGATATCCGACGGTAGTGTNNNNNTAATGCCCCACATGCTGATGC	14903410	14903577	-	0	20
INF1_smMIP_USP9Y_66	Y:14903459-14903610/17,23/-	0.705483	Y	14903594	14903610	ATGTACAATGAAGCAAC	1	14903459	14903481	ATTTTCTGTATAGCCCTAATTAC	1	14903482	14903593	ATTTTCTTAAAAATCTATTTCTGTAATAATTCTTACCATCTGATAAATTTTAGTTATTTCTTCATTTGGGCTAAAAACTAGTCCTAATGCCCCACATGCTGATGCCCAGATA	ATTTTCTGTATAGCCCTAATTACCTTCAGCTTCCCGATATCCGACGGTAGTGTNNNNNATGTACAATGAAGCAAC	14903410	14903577	-	0	1
INF1_smMIP_USP9Y_67	Y:14904889-14905040/17,23/-	0.904533	Y	14905024	14905040	ATAAGGTCATCACTTCC	2	14904889	14904911	TCACAAACCCTCTGGTTAACATT	1	14904912	14905023	AGTGCTTCACAGCAAACTTGTTCATCTTCCACCTCCAGCTTATTGCTTCCATTGGTGGTCTGCAAAATTAGAATCAGGAGCAAGTTACCTAGAGACATATTCAAGAAGAAAT	TCACAAACCCTCTGGTTAACATTCTTCAGCTTCCCGATATCCGACGGTAGTGTNNNNNATAAGGTCATCACTTCC	14904943	14905154	-	0	1
INF1_smMIP_USP9Y_68	Y:14904990-14905141/21,19/-	0.908652	Y	14905121	14905141	CACATACTTGCTTGGACAGTG	1	14904990	14905008	ACTTGTTCATCTTCCACCT	1	14905009	14905120	CAATAATAAGTCAATGATGAAGGTCTGCCAGGCTTTTTCTTTACTAAGTGCATCCAACGCTGTTGGAAGTAAAGCAAAACATAAGGTCATCACTTCCAGTGCTTCACAGCAA	ACTTGTTCATCTTCCACCTCTTCAGCTTCCCGATATCCGACGGTAGTGTNNNNNCACATACTTGCTTGGACAGTG	14904943	14905154	-	0	1
INF1_smMIP_USP9Y_69	Y:14905028-14905179/19,21/+	0.90059	Y	14905028	14905046	GTGATGACCTTATGTTTTG	2	14905159	14905179	GAAGGAAGGCTTACCTTACCG	1	14905047	14905158	CTTTACTTCCAACAGCGTTGGATGCACTTAGTAAAGAAAAAGCCTGGCAGACCTTCATCATTGACTTATTATTGCACTGTCCAAGCAAGTATGTGATTTTTATGTGTAATTT	GAAGGAAGGCTTACCTTACCGCTTCAGCTTCCCGATATCCGACGGTAGTGTNNNNNGTGATGACCTTATGTTTTG	14904943	14905154	+	0	1
INF1_smMIP_USP9Y_70	Y:14922063-14922214/16,24/-	0.900727	Y	14922199	14922214	TGGTAAAGAGTAAAGT	4	14922063	14922086	GAACAACAACAAAATAATTCCAAC	1	14922087	14922198	AATGAAGAAAAGCAGAGGCCTGTGTCCCATGCAACATCTGGTGCACATTAAAAAGAACTGCTCCTGTGCCAACTGACGAACAGTTCTGAAATAAAAACAAAATGTATCTTAT	GAACAACAACAAAATAATTCCAACCTTCAGCTTCCCGATATCCGACGGTAGTGTNNNNNTGGTAAAGAGTAAAGT	14922092	14922242	-	0	1
INF1_smMIP_USP9Y_71	Y:14922125-14922276/20,20/+	0.900966	Y	14922125	14922144	AGTTGGCACAGGAGCAGTTC	1	14922257	14922276	GCATTCTTAACATGAGAGAC	1	14922145	14922256	TTTTTAATGTGCACCAGATGTTGCATGGGACACAGGCCTCTGCTTTTCTTCATTACTTTACTCTTTACCATACTGGGGGTGAGAAGTTTTCAAATGAACTTATCAATATAAT	GCATTCTTAACATGAGAGACCTTCAGCTTCCCGATATCCGACGGTAGTGTNNNNNAGTTGGCACAGGAGCAGTTC	14922092	14922242	+	0	1
INF1_smMIP_USP9Y_72	Y:14922550-14922701/16,24/-	0.845195	Y	14922686	14922701	GGTATGTTAATATTGC	2	14922550	14922573	AAGTCTACACTCAGAGTCCATATA	1	14922574	14922685	CATTGTAAGCATAATTGAGAAGGTGCCGTAAAAGTGTGAAATAATCACCTGAATATTTACCCTTCTCTCTTGCTGTGCTCTGAAATATTAAATTAAAACAACATGAATTCAC	AAGTCTACACTCAGAGTCCATATACTTCAGCTTCCCGATATCCGACGGTAGTGTNNNNNGGTATGTTAATATTGC	14922585	14922773	-	0	1
INF1_smMIP_USP9Y_73	Y:14922648-14922799/18,22/-	0.902807	Y	14922782	14922799	AGCTGATTTGGTCATGAC	1	14922648	14922669	GAGAAGGTGCCGTAAAAGTGTG	1	14922670	14922781	ATAATAAACTAAATACTATTCAACTTACCCTAATCCTTTTGAGCCAATCAATTTCACTGACAAGAAGAACTTCAGCATTGGGTATGTTAATATTGCCATTGTAAGCATAATT	GAGAAGGTGCCGTAAAAGTGTGCTTCAGCTTCCCGATATCCGACGGTAGTGTNNNNNAGCTGATTTGGTCATGAC	14922585	14922773	-	0	1
INF1_smMIP_USP9Y_74	Y:14923525-14923676/16,24/-	0.901216	Y	14923661	14923676	TACTTTTTCTCAGAAG	9	14923525	14923548	AGGCCCAACTCACAACATGGAGAT	1	14923549	14923660	TTTGAAAGGCCAATAACTCTTTTGTTACCCCAAGGTGGCCTTCCAGTATTGGCTCTTCGACACCTGTTTCACCTGTGTTTTTAACATTATCCTGCAAAAGGAAAAATATTAT	AGGCCCAACTCACAACATGGAGATCTTCAGCTTCCCGATATCCGACGGTAGTGTNNNNNTACTTTTTCTCAGAAG	14923548	14923736	-	0	1
INF1_smMIP_USP9Y_75	Y:14923642-14923793/16,24/+	0.907997	Y	14923642	14923657	GAGTTATTGGCCTTTC	1	14923770	14923793	ACTGGAGTGCAGTGGTGCCGTCTC	2	14923658	14923769	AAACTTCTGAGAAAAAGTATCACTTTGGTTGTGAAAAAGGAGGTGCTAATCTCATTAAAGTAAGTACTTTTTTTTTTCTTTTTTTGAGATGGAGTCTTGCTCTGTGGCCCAG	ACTGGAGTGCAGTGGTGCCGTCTCCTTCAGCTTCCCGATATCCGACGGTAGTGTNNNNNGAGTTATTGGCCTTTC	14923548	14923736	+	0	1
INF1_smMIP_USP9Y_76	Y:14924692-14924843/18,22/-	0.880456	Y	14924826	14924843	GCTCAGCTGGTAGTTCTC	1	14924692	14924713	GGAACAATATGTTTCTTCAAAG	1	14924714	14924825	CACTTCTTAAATACTGCAGGTAAACTTTGGATGCGGGAAAGATGAAATCATCAATTAATTCCTAGTAAGTTAGAAAAAGACATTACATGTTATTAGTAGAAAATATAGGTTA	GGAACAATATGTTTCTTCAAAGCTTCAGCTTCCCGATATCCGACGGTAGTGTNNNNNGCTCAGCTGGTAGTTCTC	14924743	14925007	-	0	1
INF1_smMIP_USP9Y_77	Y:14924787-14924938/17,23/+	0.907454	Y	14924787	14924803	TTCCCGCATCCAAAGTT	1	14924916	14924938	GCTGTGTGAGGAATCTCAAACAG	1	14924804	14924915	TACCTGCAGTATTTAAGAAGTGGAGAACTACCAGCTGAGCAGGCTATTCCAGTCTGTAGTTCACCCGTTACCATCAATGCCGGTTTTGAGCTACTTGTAGCATTAGCTATTG	GCTGTGTGAGGAATCTCAAACAGCTTCAGCTTCCCGATATCCGACGGTAGTGTNNNNNTTCCCGCATCCAAAGTT	14924743	14925007	+	0	1
INF1_smMIP_USP9Y_78	Y:14924873-14925024/16,24/-	0.751291	Y	14925009	14925024	TAATGAACAAAACAGC	10	14924873	14924896	TAGCTCAAAACCGGCATTGATGGT	1	14924897	14925008	TTTATAATTTAAAATACTCACTAGTAATTGCTGTGCCCATGTAATACATTTCAGTCAAACAGTCTACTATCTGTTTGAGATTCCTCACACAGCCAATAGCTAATGCTACAAG	TAGCTCAAAACCGGCATTGATGGTCTTCAGCTTCCCGATATCCGACGGTAGTGTNNNNNTAATGAACAAAACAGC	14924743	14925007	-	0	1
INF1_smMIP_USP9Y_79	Y:14927990-14928141/16,24/-	0.905066	Y	14928126	14928141	AGCATTTTTGAGTCCC	11	14927990	14928013	TCTGTTCACCATTTTCAGGCTAAC	1	14928014	14928125	ACAAATCCTTTTGGTGGGCGGGGTCCAACAGGGGGCAGATATTCCCACTCAGTAAGTGCTTCACAAGCTGAGTTGAAAAGAGAAAAGATGCTTATACTATGAAAACAGTGAT	TCTGTTCACCATTTTCAGGCTAACCTTCAGCTTCCCGATATCCGACGGTAGTGTNNNNNAGCATTTTTGAGTCCC	14928037	14928299	-	0	1
INF1_smMIP_USP9Y_80	Y:14928088-14928239/16,24/-	0.905264	Y	14928224	14928239	AAATCACTACCTGTGC	2	14928088	14928111	TGGGCGGGGTCCAACAGGGGGCAG	1	14928112	14928223	CTTCAATTGCAAGAATACTGTTCCTGATAGAAGGAATCATGTATAGCTGCTGGATCACAGAGTTCATGTAACACGTAGCACCAGCATTTTTGAGTCCCACAAATCCTTTTGG	TGGGCGGGGTCCAACAGGGGGCAGCTTCAGCTTCCCGATATCCGACGGTAGTGTNNNNNAAATCACTACCTGTGC	14928037	14928299	-	0	1
INF1_smMIP_USP9Y_81	Y:14928185-14928336/20,20/+	0.909438	Y	14928185	14928204	TGATTCCTTCTATCAGGAAC	1	14928317	14928336	GCAGATGCTGTTGTTCTCCC	1	14928205	14928316	AGTATTCTTGCAATTGAAGGCACAGGTAGTGATTTACACGATGATATGTTCGGGGATGAGAAGCAGGACAGTGAGGTAAATTTTAATACTGTTTTCTTTGAAGAGTCTGATA	GCAGATGCTGTTGTTCTCCCCTTCAGCTTCCCGATATCCGACGGTAGTGTNNNNNTGATTCCTTCTATCAGGAAC	14928037	14928299	+	0	1
INF1_smMIP_USP9Y_82	Y:14930279-14930430/20,20/-	0.897084	Y	14930411	14930430	CTGTCTTACTTAATGCTGGC	1	14930279	14930298	GAAGCTGAAACAAATACCAG	1	14930299	14930410	TTGTCTTCAAATTGATGAGGATATCCAAATACATCATCTCGGGGATCAACATTACTCTAGAGACCAAAAGACATTATTGATGAGCTAATCTAACTTTAACAGTATAACGAAA	GAAGCTGAAACAAATACCAGCTTCAGCTTCCCGATATCCGACGGTAGTGTNNNNNCTGTCTTACTTAATGCTGGC	14930333	14930565	-	0	10
INF1_smMIP_USP9Y_83	Y:14930362-14930513/21,19/-	0.917142	Y	14930493	14930513	GTATTGTAGTTGGGAAGCAGC	1	14930362	14930380	ACATCATCTCGGGGATCAA	1	14930381	14930492	TAAATGACCAAAGATGACCTGAAGGTGTCTTAGGACACCAATATTATACTCTTTCCTATCTTCTGTCTTACTTAATGCTGGCTTGTCTTCAAATTGATGAGGATATCCAAAT	ACATCATCTCGGGGATCAACTTCAGCTTCCCGATATCCGACGGTAGTGTNNNNNGTATTGTAGTTGGGAAGCAGC	14930333	14930565	-	0	1
INF1_smMIP_USP9Y_84	Y:14930454-14930605/21,19/-	0.765469	Y	14930585	14930605	TAGAAGTTTACTGTATTGAGG	1	14930454	14930472	GAAGGTGTCTTAGGACACC	2	14930473	14930584	TTTTTATGAAACTTAAATGATCACCCACCCATAATTTACCTGAACTGTTTCCAAAATCCTCTGGGTACATAGTATTGTAGTTGGGAAGCAGCTAAATGACCAAAGATGACCT	GAAGGTGTCTTAGGACACCCTTCAGCTTCCCGATATCCGACGGTAGTGTNNNNNTAGAAGTTTACTGTATTGAGG	14930333	14930565	-	0	20
INF1_smMIP_USP9Y_85	Y:14945571-14945722/22,18/+	0.884779	Y	14945571	14945592	AGGCATGTATTACATAACTCAT	1	14945705	14945722	GCTTTAGGACACCCGGCT	1	14945593	14945704	TTTGTTTCCTTTCCTTCTTAGGCTTTGGGGTGAACCTGTTAATCTCCGTGAACAACATGATGCCTTAGAGTTTTTTAATTCTTTGGTGGATAGTTTAGATGAAGCTTTAAAA	GCTTTAGGACACCCGGCTCTTCAGCTTCCCGATATCCGACGGTAGTGTNNNNNAGGCATGTATTACATAACTCAT	14945592	14945807	+	0	1
INF1_smMIP_USP9Y_86	Y:14945678-14945829/22,18/+	0.615925	Y	14945678	14945699	GTGGATAGTTTAGATGAAGCTT	2	14945812	14945829	GTATACTTCGTGTTGTTT	1	14945700	14945811	TAAAAGCTTTAGGACACCCGGCTATACTAAGTAAAGTCCTAGGAGGCTCCTTTGCTGATCAGAAGATCTGCCAAGGCTGCCCACATAGGTAAGTGCTAATTATGTTTTTAAT	GTATACTTCGTGTTGTTTCTTCAGCTTCCCGATATCCGACGGTAGTGTNNNNNGTGGATAGTTTAGATGAAGCTT	14945592	14945807	+	0	20
INF1_smMIP_USP9Y_87	Y:14949777-14949928/20,20/-	0.395857	Y	14949909	14949928	CTCCTTTGATATACTGTTCC	1	14949777	14949796	CTATAGGTTTAGTTTTTTTT	1	14949797	14949908	AAAGAGTCAAGAAGATTTTGATGATTTCTAATATCCACATTCAAAGTTGTAAAAGATTCTTCACATTCATACCTAAAGATATTATTAATGAAACAAATTAAAAGAATGTATT	CTATAGGTTTAGTTTTTTTTCTTCAGCTTCCCGATATCCGACGGTAGTGTNNNNNCTCCTTTGATATACTGTTCC	14949815	14949998	-	0	20
INF1_smMIP_USP9Y_88	Y:14949877-14950028/18,22/-	0.623238	Y	14950011	14950028	TCCTATTCTGTTCAATGC	1	14949877	14949898	GAAGATTTTGATGATTTCTAAT	1	14949899	14950010	AATCATTATTTTTCAAAAGTAAAAAAAAATACCTTTTTATCACATTTTTCACAATGATATGCATTTGCACCTTCCAATAAATCTCCTTTGATATACTGTTCCAAAGAGTCAA	GAAGATTTTGATGATTTCTAATCTTCAGCTTCCCGATATCCGACGGTAGTGTNNNNNTCCTATTCTGTTCAATGC	14949815	14949998	-	0	1
INF1_smMIP_USP9Y_89	Y:14951697-14951848/16,24/+	0.740451	Y	14951697	14951712	AATAGACTGTAAACTT	9	14951825	14951848	GCCTCGGGTTCTTGCTATCCAACT	1	14951713	14951824	TAAAATTAACATGAAATTGTTTTAGTTTCTGTTCTAGTTACAAGAGAACATTTGTTTATATTCTCTGTTTATTATAGGTTGACACAGTAAAGCGCCTGCTAATTAAAAAATT	GCCTCGGGTTCTTGCTATCCAACTCTTCAGCTTCCCGATATCCGACGGTAGTGTNNNNNAATAGACTGTAAACTT	14951768	14952560	+	0	1
INF1_smMIP_USP9Y_90	Y:14951804-14951955/16,24/+	0.915836	Y	14951804	14951819	GCGCCTGCTAATTAAA	1	14951932	14951955	GACCTTACACAGTAGCAGGTGTTG	1	14951820	14951931	AAATTGCCTCGGGTTCTTGCTATCCAACTCAAACGATTTGACTATGACTGGGAAAGAGAATGTGCAATTAAATTCAATGATTATTTTGAATTTCCTCGAGAGCTGGATATGG	GACCTTACACAGTAGCAGGTGTTGCTTCAGCTTCCCGATATCCGACGGTAGTGTNNNNNGCGCCTGCTAATTAAA	14951768	14952560	+	0	1
INF1_smMIP_USP9Y_91	Y:14951913-14952064/21,19/-	0.938071	Y	14952044	14952064	AGCACTCCTACAAGTCTGTAC	1	14951913	14951931	CCATATCCAGCTCTCGAGG	1	14951932	14952043	TTTGTGCCTCCTGCAGTTTCATTGTCAGACTGCTCTTTCTGTTCAATCAACTCATTTTCTGAGTTTACATTATCCCTTTCCAGGTTTGCAACACCTGCTACTGTGTAAGGTC	CCATATCCAGCTCTCGAGGCTTCAGCTTCCCGATATCCGACGGTAGTGTNNNNNAGCACTCCTACAAGTCTGTAC	14951768	14952560	-	0	1
INF1_smMIP_USP9Y_92	Y:14951998-14952149/19,21/+	0.906588	Y	14951998	14952016	TTGAACAGAAAGAGCAGTC	1	14952129	14952149	GATGATCAGACAGATCACTGG	1	14952017	14952128	TGACAATGAAACTGCAGGAGGCACAAAGTACAGACTTGTAGGAGTGCTTGTACACAGTGGTCAAGCAAGCGGTGGGCATTATTATTCTTACATCATTCAAAGGAATGGTAAA	GATGATCAGACAGATCACTGGCTTCAGCTTCCCGATATCCGACGGTAGTGTNNNNNTTGAACAGAAAGAGCAGTC	14951768	14952560	+	0	1
INF1_smMIP_USP9Y_93	Y:14952085-14952236/20,20/-	0.913159	Y	14952217	14952236	CATGTACTCTCCACCAAAAC	2	14952085	14952104	AGAATAATAATGCCCACCGC	1	14952105	14952216	ACTGATTTTTCATTTCTTCATCATCATCCATTTTGCATTCTGTTACATCTCCATCATCAAATTTATACCAGTGATCTGTCTGATCATCTTTACCATTCCTTTGAATGATGTA	AGAATAATAATGCCCACCGCCTTCAGCTTCCCGATATCCGACGGTAGTGTNNNNNCATGTACTCTCCACCAAAAC	14951768	14952560	-	0	1
INF1_smMIP_USP9Y_94	Y:14952159-14952310/18,22/+	0.892248	Y	14952159	14952176	GATGATGGAGATGTAACA	2	14952289	14952310	GGTGGTGGAATGCTTACATACT	1	14952177	14952288	GAATGCAAAATGGATGATGATGAAGAAATGAAAAATCAGTGTTTTGGTGGAGAGTACATGGGAGAAGTATTTGATCACATGATGAAGCGCATGTCATATAGGCGACAGAAGA	GGTGGTGGAATGCTTACATACTCTTCAGCTTCCCGATATCCGACGGTAGTGTNNNNNGATGATGGAGATGTAACA	14951768	14952560	+	0	1
INF1_smMIP_USP9Y_95	Y:14952267-14952418/18,22/-	0.901245	Y	14952401	14952418	TCAATGGCTGGTGACATA	2	14952267	14952288	TCTTCTGTCGCCTATATGACAT	1	14952289	14952400	ATGATCTGATGGGGTCTTGCAATAGTTAGCTCTGATATGTATCTTATCATCTCATCATCTTCATCTATCATATCCATTTGTTCATAAAAAAGTATGTAAGCATTCCACCACC	TCTTCTGTCGCCTATATGACATCTTCAGCTTCCCGATATCCGACGGTAGTGTNNNNNTCAATGGCTGGTGACATA	14951768	14952560	-	0	10
INF1_smMIP_USP9Y_96	Y:14952371-14952522/20,20/+	0.830204	Y	14952371	14952390	GCTAACTATTGCAAGACCCC	1	14952503	14952522	GCTTACATGTAATGGTGTTT	1	14952391	14952502	ATCAGATCATTATGTCACCAGCCATTGAGAGAAGTGTACGGAAACAAAATGTGAAATTTATGCATAACCGATTGCAATATAGTTTAGAGTATTTTCAGTTTGTGAAAAAACT	GCTTACATGTAATGGTGTTTCTTCAGCTTCCCGATATCCGACGGTAGTGTNNNNNGCTAACTATTGCAAGACCCC	14951768	14952560	+	0	1
INF1_smMIP_USP9Y_97	Y:14952452-14952603/17,23/-	0.850633	Y	14952587	14952603	AAGGTATCCTAGAAGCC	1	14952452	14952474	AACTATATTGCAATCGGTTATGC	1	14952475	14952586	AAATAAAAACTATTCTTTATTAGAAGAAGCTACTTTCAAAGCTTACCTGGAGCAGGGTTTAAATAAACACCATTACATGTAAGCAGTTTTTTCACAAACTGAAAATACTCTA	AACTATATTGCAATCGGTTATGCCTTCAGCTTCCCGATATCCGACGGTAGTGTNNNNNAAGGTATCCTAGAAGCC	14951768	14952560	-	0	1
INF1_smMIP_USP9Y_98	Y:14952855-14953006/21,19/+	0.634154	Y	14952855	14952875	CACTAAGAATAACTAAGATTT	1	14952988	14953006	GCTTGCTGCTAGATTCCTC	1	14952876	14952987	TTTAACATAGAGTTTGAAGATAAAAATGTTTTTAACCATATATATACTTTTTATTTAAAGGGCAGGATTATTTGTTGCCTGAAGCAGAAGAAATTACTATGATTAGTATTCA	GCTTGCTGCTAGATTCCTCCTTCAGCTTCCCGATATCCGACGGTAGTGTNNNNNCACTAAGAATAACTAAGATTT	14952914	14953079	+	0	1
INF1_smMIP_USP9Y_99	Y:14952919-14953070/16,24/-	0.888712	Y	14953055	14953070	AAACCATGTACCAGTC	4	14952919	14952942	TCCTGCCCTTTAAATAAAAAGTAT	1	14952943	14953054	ACTGGCAGGACCACGAACTATTTTCTTGGTGTGAAATCCAGTGGTAAAGAGGAATCTAGCAGCAAGCTGAATACTAATCATAGTAATTTCTTCTGCTTCAGGCAACAAATAA	TCCTGCCCTTTAAATAAAAAGTATCTTCAGCTTCCCGATATCCGACGGTAGTGTNNNNNAAACCATGTACCAGTC	14952914	14953079	-	0	1
INF1_smMIP_USP9Y_100	Y:14952985-14953136/18,22/-	0.793943	Y	14953119	14953136	AGGAAAAAATAAAACAGG	7	14952985	14953006	GAGGAATCTAGCAGCAAGCTGA	1	14953007	14953118	AAAAAATAAAGAACCAAACAACTATAAGTACTATAAGAATGAAATCCAAAACCATGTACCAGTCACTGGCAGGACCACGAACTATTTTCTTGGTGTGAAATCCAGTGGTAAA	GAGGAATCTAGCAGCAAGCTGACTTCAGCTTCCCGATATCCGACGGTAGTGTNNNNNAGGAAAAAATAAAACAGG	14952914	14953079	-	0	1
INF1_smMIP_USP9Y_101	Y:14954124-14954275/16,24/+	0.870753	Y	14954124	14954139	CACATCACTAAAATTT	6	14954252	14954275	GCTTCTCTGAATACCTTCTGGAGT	1	14954140	14954251	GACGTTCATAGATGTTTCTGTTTTAGGTATGATGCACTGTGCGTTCTTCTCCGTCACAGCAAAAATGTACGTTTTTGGTTTACTCATAATGTCCTTTTTAATGTATCAAATC	GCTTCTCTGAATACCTTCTGGAGTCTTCAGCTTCCCGATATCCGACGGTAGTGTNNNNNCACATCACTAAAATTT	14954144	14954411	+	0	1
INF1_smMIP_USP9Y_102	Y:14954214-14954365/19,21/-	0.900553	Y	14954347	14954365	AAGGAGAAGGACAAGACCC	1	14954214	14954234	AGGACATTATGAGTAAACCAA	1	14954235	14954346	ATCTTGCAAGGAAAAGTGTGCAATAAACACTATAAGTTTTGCAAATGCACCCCTCACTTCTGCACTAGGGCACTCCAGAAGGTATTCAGAGAAGCGATTTGATACATTAAAA	AGGACATTATGAGTAAACCAACTTCAGCTTCCCGATATCCGACGGTAGTGTNNNNNAAGGAGAAGGACAAGACCC	14954144	14954411	-	0	1
INF1_smMIP_USP9Y_103	Y:14954290-14954441/18,22/+	0.797835	Y	14954290	14954307	GTGAGGGGTGCATTTGCA	1	14954420	14954441	GCAATTAAATACTTAGAAGTAA	1	14954308	14954419	AAACTTATAGTGTTTATTGCACACTTTTCCTTGCAAGATGGGTCTTGTCCTTCTCCTTTTGCATCTCCAGGACCTTCTAGTCAGGTAATTGCATGGCTTTTTTTTTTTTTAA	GCAATTAAATACTTAGAAGTAACTTCAGCTTCCCGATATCCGACGGTAGTGTNNNNNGTGAGGGGTGCATTTGCA	14954144	14954411	+	0	20
INF1_smMIP_USP9Y_104	Y:14954927-14955078/16,24/-	0.856024	Y	14955063	14955078	TAAATGATGTCCATGC	4	14954927	14954950	GCAGAAACAGCTTTTATTTGCATA	1	14954951	14955062	TCTGAAACTTCCCTTCTCAAGAGATTTAGTGTGGCTCTTAGTAAGTGGTCACTCAAGCTCAAGTTATCACATGCCTGTGAAAAATGAAATATTATTTTATCAGCATCAAGAT	GCAGAAACAGCTTTTATTTGCATACTTCAGCTTCCCGATATCCGACGGTAGTGTNNNNNTAAATGATGTCCATGC	14954967	14955138	-	0	1
INF1_smMIP_USP9Y_105	Y:14955037-14955188/17,23/-	0.681736	Y	14955172	14955188	ATTAAAATGTGCTTCCC	1	14955037	14955059	GAAACTTCCCTTCTCAAGAGATT	2	14955060	14955171	ATTTAATATTTGAAATTGAAACAATCATTAATATAGTTGTGAAAAATTCTTACCTAAATTGGCATACATTACAAACAAATTAAAATATTGCTGTAAATGATGTCCATGCTCT	GAAACTTCCCTTCTCAAGAGATTCTTCAGCTTCCCGATATCCGACGGTAGTGTNNNNNATTAAAATGTGCTTCCC	14954967	14955138	-	0	1
INF1_smMIP_USP9Y_106	Y:14958201-14958352/22,18/-	0.9126	Y	14958331	14958352	ATATTTGATTGGAGGACCTGGT	1	14958201	14958218	GCTAAGAGGGTAAGTACT	1	14958219	14958330	CCTTCGTCTAAAGACACAAGCATAAAGGTAGCAGGTACATTCAATTTCAGAAGCTGTGTTTTTTCTGCCACACCTATAAAAAAGGACAGAAAAATAATATGTAGAAAAAAAA	GCTAAGAGGGTAAGTACTCTTCAGCTTCCCGATATCCGACGGTAGTGTNNNNNATATTTGATTGGAGGACCTGGT	14958236	14958463	-	0	20
INF1_smMIP_USP9Y_107	Y:14958309-14958460/18,22/+	0.888112	Y	14958309	14958326	TGCTTGTGTCTTTAGACG	1	14958439	14958460	CAATGGTAAAGTAGCATGTTCC	1	14958327	14958438	AAGGACCAGGTCCTCCAATCAAATATCAGTATGCTGAATTAGGCAAGTTATATTCAGTAGTGTCTCAGCTGATTCGTTGTTGCAATGTGTCATCAACAATGCAGTCTTCAAT	CAATGGTAAAGTAGCATGTTCCCTTCAGCTTCCCGATATCCGACGGTAGTGTNNNNNTGCTTGTGTCTTTAGACG	14958236	14958463	+	0	1
INF1_smMIP_USP9Y_108	Y:14958355-14958506/18,22/-	0.88641	Y	14958489	14958506	GTGCTACATAAAGCTAGC	1	14958355	14958376	TAACTTGCCTAATTCAGCATAC	1	14958377	14958488	ATTATTTTTAAACTGCTGTAAAAGAAATGGAACATGCTACTTTACCATTGATTGAAGACTGCATTGTTGATGACACATTGCAACAACGAATCAGCTGAGACACTACTGAATA	TAACTTGCCTAATTCAGCATACCTTCAGCTTCCCGATATCCGACGGTAGTGTNNNNNGTGCTACATAAAGCTAGC	14958236	14958463	-	0	10
INF1_smMIP_USP9Y_109	Y:14958733-14958884/20,20/-	0.762577	Y	14958865	14958884	CGAAAGGATTGGGGAGAGGG	1	14958733	14958752	AAATTCACCTAAATGGTCAG	1	14958753	14958864	GGATTACCTAGAACAGATTTGTTATCAATGAAAAACCAATAGAATTCCTCACAAAATTATAATAATAAACTTCTTAACTTAAAAAATACAATCTGATTTTAAATTAAATTAA	AAATTCACCTAAATGGTCAGCTTCAGCTTCCCGATATCCGACGGTAGTGTNNNNNCGAAAGGATTGGGGAGAGGG	14958836	14959272	-	0	1
INF1_smMIP_USP9Y_110	Y:14958842-14958993/17,23/-	0.862291	Y	14958977	14958993	GAGTTACTGCAGTCTTC	1	14958842	14958864	GGATTACCTAGAACAGATTTGTT	1	14958865	14958976	AATAATTTTCTTCACATAACTTGTTCTCACAAATAAAATGTCTAACACATTCTGCTGAATTGGCATTATAGGCTGTGATAAATTAAGGTCACCGAAAGGATTGGGGAGAGGG	GGATTACCTAGAACAGATTTGTTCTTCAGCTTCCCGATATCCGACGGTAGTGTNNNNNGAGTTACTGCAGTCTTC	14958836	14959272	-	0	1
INF1_smMIP_USP9Y_111	Y:14958917-14959068/19,21/-	0.901275	Y	14959050	14959068	AGTTCGCTGAGGACAGTAG	1	14958917	14958937	GTCTAACACATTCTGCTGAAT	1	14958938	14959049	ATGAGAACTGAGGATTCTCCCAAGAGCAAAAGCGAAGTAATTTGATGGTATCCTCTGAGTTACTGCAGTCTTCAATAATTTTCTTCACATAACTTGTTCTCACAAATAAAAT	GTCTAACACATTCTGCTGAATCTTCAGCTTCCCGATATCCGACGGTAGTGTNNNNNAGTTCGCTGAGGACAGTAG	14958836	14959272	-	0	10
INF1_smMIP_USP9Y_112	Y:14959017-14959168/18,22/+	0.909359	Y	14959017	14959034	GCTTTTGCTCTTGGGAGA	1	14959147	14959168	CTCTTACCTATTTGTAGGTTGC	1	14959035	14959146	ATCCTCAGTTCTCATCTACTGTCCTCAGCGAACTTCTCTGGCAGGTGAAAGAAAAATAAACATTTATATATCTGTAATTCTATTCATTTTTTAAAAATACATAATTCACTAT	CTCTTACCTATTTGTAGGTTGCCTTCAGCTTCCCGATATCCGACGGTAGTGTNNNNNGCTTTTGCTCTTGGGAGA	14958836	14959272	+	0	1
INF1_smMIP_USP9Y_113	Y:14959044-14959195/21,19/+	0.892415	Y	14959044	14959064	TCTCATCTACTGTCCTCAGCG	1	14959177	14959195	ATACCTATGAACTTCGGCC	1	14959065	14959176	AACTTCTCTGGCAGGTGAAAGAAAAATAAACATTTATATATCTGTAATTCTATTCATTTTTTAAAAATACATAATTCACTATCTCTTACCTATTTGTAGGTTGCATATTCAT	ATACCTATGAACTTCGGCCCTTCAGCTTCCCGATATCCGACGGTAGTGTNNNNNTCTCATCTACTGTCCTCAGCG	14958836	14959272	+	0	1
INF1_smMIP_USP9Y_114	Y:14959131-14959282/16,24/-	0.838219	Y	14959267	14959282	TAATTATTCTGGTGGC	3	14959131	14959154	GGTAAGAGATAGTGAATTATGTAT	1	14959155	14959266	AAAAGGGTATTCACCTGTGAGTCTGCCAGGAGTCCTCAATCAGTAAAATTTGGAAAAGTAGATCTAAATATGGCCGAAGTTCATAGGTATATGAATATGCAACCTACAAATA	GGTAAGAGATAGTGAATTATGTATCTTCAGCTTCCCGATATCCGACGGTAGTGTNNNNNTAATTATTCTGGTGGC	14958836	14959272	-	0	1
INF1_smMIP_USP9Y_115	Y:14959171-14959322/16,24/-	0.859344	Y	14959307	14959322	CAAATGACAATTCCAG	4	14959171	14959194	GCCGAAGTTCATAGGTATATGAAT	1	14959195	14959306	TCATTTCAAGAACTTGGGAAATTCTAATTATTCTGGTGGCAAAAGGGTATTCACCTGTGAGTCTGCCAGGAGTCCTCAATCAGTAAAATTTGGAAAAGTAGATCTAAATATG	GCCGAAGTTCATAGGTATATGAATCTTCAGCTTCCCGATATCCGACGGTAGTGTNNNNNCAAATGACAATTCCAG	14958836	14959272	-	0	1
INF1_smMIP_USP9Y_116	Y:14968187-14968338/17,23/-	0.898647	Y	14968322	14968338	GATTCTTCGAGCGCTGT	1	14968187	14968209	GTTCCTAATTATGTGCCATTTAG	1	14968210	14968321	ATTGTATCGAACAGCCCATCTCTGTCATCTGGAATTCCTTTAAGTGCATTATGAATTCTAAAACAGAAGCAGATGTAAAACTTTGTAATATCCAATAGTAGCTAACATTTGA	GTTCCTAATTATGTGCCATTTAGCTTCAGCTTCCCGATATCCGACGGTAGTGTNNNNNGATTCTTCGAGCGCTGT	14968243	14968441	-	0	1
INF1_smMIP_USP9Y_117	Y:14968287-14968438/22,18/+	0.931693	Y	14968287	14968308	ATTCCAGATGACAGAGATGGGC	1	14968421	14968438	GGTGAGGGTTTTTCTCTT	1	14968309	14968420	TGTTCGATACAATACAGCGCTCGAAGAATCACTATCAAAAACGAGCATATCAGTGCATAAAATGTATGGTAGCTCTATTTAGCAGTTGTCCTGTTGCTTACCAGATCTTACA	GGTGAGGGTTTTTCTCTTCTTCAGCTTCCCGATATCCGACGGTAGTGTNNNNNATTCCAGATGACAGAGATGGGC	14968243	14968441	+	0	1
INF1_smMIP_USP9Y_118	Y:14968319-14968470/16,24/+	0.902995	Y	14968319	14968334	AATACAGCGCTCGAAG	1	14968447	14968470	GTAGAAACCTCTGTCACAAGTAAG	1	14968335	14968446	AATCACTATCAAAAACGAGCATATCAGTGCATAAAATGTATGGTAGCTCTATTTAGCAGTTGTCCTGTTGCTTACCAGATCTTACAGGTGAGGGTTTTTCTCTTATAAATTT	GTAGAAACCTCTGTCACAAGTAAGCTTCAGCTTCCCGATATCCGACGGTAGTGTNNNNNAATACAGCGCTCGAAG	14968243	14968441	+	0	1
INF1_smMIP_USP9Y_119	Y:14968505-14968656/17,23/+	0.737151	Y	14968505	14968521	AGCTGATACTGAAAATC	2	14968634	14968656	CTGGCAATCCTCAGTATAGTTAC	1	14968522	14968633	ATTCTAAATTCTAAATAGTTTTATTTTTTTCTAAAGGGTAACGGAGATCTTAAAAGAAAATGGACCTGGGCAGTGGAATGGCTAGGAGATGAACTTGAAAGAAGACCATATA	CTGGCAATCCTCAGTATAGTTACCTTCAGCTTCCCGATATCCGACGGTAGTGTNNNNNAGCTGATACTGAAAATC	14968536	14968790	+	0	1
INF1_smMIP_USP9Y_120	Y:14968542-14968693/16,24/-	0.86215	Y	14968678	14968693	CTGTTTCATTGCTTTG	9	14968542	14968565	CCGTTACCCTTTAGAAAAAAATAA	1	14968566	14968677	TACTGGAGGAGACCAATTGTTGTAACTATACTGAGGATTGCCAGTATATGGTCTTCTTTCAAGTTCATCTCCTAGCCATTCCACTGCCCAGGTCCATTTTCTTTTAAGATCT	CCGTTACCCTTTAGAAAAAAATAACTTCAGCTTCCCGATATCCGACGGTAGTGTNNNNNCTGTTTCATTGCTTTG	14968536	14968790	-	0	1
INF1_smMIP_USP9Y_121	Y:14968662-14968813/16,24/+	0.93519	Y	14968662	14968677	TTGGTCTCCTCCAGTA	3	14968790	14968813	CCAATGGACAGCAGATGGAAATGG	1	14968678	14968789	CAAAGCAATGAAACAGCAAATGGTTATTTCTTAGAAAGATCACATAGTGCTAGGATGACACTTGCAAAAGCTTGTGAACTCTGTCCAGAAGAGGTAAAAAAAAAAAAGGCTA	CCAATGGACAGCAGATGGAAATGGCTTCAGCTTCCCGATATCCGACGGTAGTGTNNNNNTTGGTCTCCTCCAGTA	14968536	14968790	+	0	1
INF1_smMIP_USP9Y_122	Y:14969428-14969579/16,24/-	0.584298	Y	14969564	14969579	TACTGAGAGGCAGGTG	5	14969428	14969451	AAAAGTAACTTCAAATTTATATTT	1	14969452	14969563	AATGAGGATATAATGGGGCATCTTCTGATGGAGAGGGCTCATGCTCATCTGGGGCATCCTGGTCATCTGGCTCCTAATTTTAAATATTTAAAGAGATTAAGCATTAGATTAT	AAAAGTAACTTCAAATTTATATTTCTTCAGCTTCCCGATATCCGACGGTAGTGTNNNNNTACTGAGAGGCAGGTG	14969469	14969606	-	0	20
INF1_smMIP_USP9Y_123	Y:14969475-14969626/16,24/-	0.71961	Y	14969611	14969626	AAAATGGGTTTGGGGG	4	14969475	14969498	TCTGGCTCCTAATTTTAAATATTT	1	14969499	14969610	ATAAAAATGAAAAATCCTTTTTACCTGTTGATACTGAGAGGCAGGTGAATGAGGATATAATGGGGCATCTTCTGATGGAGAGGGCTCATGCTCATCTGGGGCATCCTGGTCA	TCTGGCTCCTAATTTTAAATATTTCTTCAGCTTCCCGATATCCGACGGTAGTGTNNNNNAAAATGGGTTTGGGGG	14969469	14969606	-	0	1
INF1_smMIP_USP9Y_124	Y:14971129-14971280/21,19/-	0.905958	Y	14971260	14971280	CGTTGGCCTGTTTTCTGAGGG	1	14971129	14971147	ATTTAAAACCATGGGGTAA	1	14971148	14971259	TTGTTCAAGTGATGTGCTGCTGGTCCTGTATATGGCTGTCCATGTACATGATTATTCTAAGAGGGTGAAAGAGACCAGCATTGTAACACTTTTCAAATATTAACAATTAAAA	ATTTAAAACCATGGGGTAACTTCAGCTTCCCGATATCCGACGGTAGTGTNNNNNCGTTGGCCTGTTTTCTGAGGG	14971182	14971361	-	0	10
INF1_smMIP_USP9Y_125	Y:14971228-14971379/18,22/-	0.913153	Y	14971362	14971379	AGTGCATAGTCATAAAGG	1	14971228	14971249	GATGTGCTGCTGGTCCTGTATA	1	14971250	14971361	AAGCAGTTAATTATTGCTTTTCACTGATCCTTCATCTGAGGTGAGGATACTTCTTCATTGCCTTCATAATTTTCTTGTGTTCGTTGGCCTGTTTTCTGAGGGTTGTTCAAGT	GATGTGCTGCTGGTCCTGTATACTTCAGCTTCCCGATATCCGACGGTAGTGTNNNNNAGTGCATAGTCATAAAGG	14971182	14971361	-	0	5
INF1_smMIP_DDX3Y_1	Y:15016782-15016933/21,19/-	0.912556	Y	15016913	15016933	AGGGTCCCGTAGAAAGCCTCG	1	15016782	15016800	CGAATAGCGGAACTCTTAC	1	15016801	15016912	GTAGGCTTACTTTGACTCACCTGCTGGTCCAGTTCAGGGTCATTTTTCACCACCACATGACTCATCCCTGAAGAGAAGCGAAAAATCGGGTAGTCCACTGTAGGTGTGAGAC	CGAATAGCGGAACTCTTACCTTCAGCTTCCCGATATCCGACGGTAGTGTNNNNNAGGGTCCCGTAGAAAGCCTCG	15016826	15016912	-	0	1
[truncated: 452 more rows]

## Sheet: Sheet3
>mip_key	logistic_score	chr	ext_probe_start	ext_probe_stop	ext_probe_copy	ext_probe_sequence	lig_probe_start	lig_probe_stop	lig_probe_copy	lig_probe_sequence	mip_scan_start_position	mip_scan_stop_position	scan_target_sequence	mip_sequence	feature_start_position	feature_stop_position	probe_strand	failure_flags	mip_name
[truncated: 66 more rows]
