# Supplementary material for: Genetic diversity of infertile males in India
Source: Research Square preprint supplement (doi:10.21203/rs.3.rs-7849365/v1), 2025-10-31
Supplement: Supplementary file 2 [file 1af3cc1e7de9d647b176e55d.xlsx]

## Sheet: Sheet1
Supplementary Table 9: CNV calls from WES dataset
Sr No	Sample ID	CNV calls	Filter (Selected-Pass)	TYPE (Only Gain/ Loss)	PROBES (Selected >=3)	Gene (de-selected non-coding)	CONTROLS_LOSS_FREQ (<0.05)	CONTROLS_GAIN_FREQ (<0.01)	CONTROLS_CN_FREQ_PREDICTION (selected Low)	CONTROLS_NA_FRACTION (<0.1)	MAPPABILITY (>0.80)	Output
1	MI-110	71	31	7	0	6	5	2	2	2	2	No candidate CNV detected
2	MI-164	216	69	62	11	11	11	6	6	5	5	No candidate CNV detected
3	MI-246	1163	631	622	203	202	202	162	161	141	141	No candidate CNV detected
4	MI-134	61	16	7	1	1	0	0	0	0	0	No candidate CNV detected
5	MI-158	92	22	16	2	2	2	2	2	1	1	No candidate CNV detected
6	MI-196	120	39	26	6	6	5	3	3	2	2	No candidate CNV detected
7	MI-132	86	26	21	5	5	5	2	2	2	2	No candidate CNV detected
8	MI-155	64	22	8	1	1	1	0	0	0	0	No candidate CNV detected
9	MI-159	92	25	17	4	3	1	1	1	1	1	No candidate CNV detected
10	MI-123	106	27	19	3	3	3	2	2	2	2	No candidate CNV detected
11	MI-162	215	71	61	12	12	11	7	7	7	7	No candidate CNV detected
12	MI-156	102	14	10	0	0	0	0	0	0	0	No candidate CNV detected
13	MI-138	266	104	97	18	18	16	14	14	12	10	No candidate CNV detected
14	MI-172	106	28	24	2	2	2	2	2	1	1	No candidate CNV detected
15	MI-86	61	15	7	0	0	0	0	0	0	0	No candidate CNV detected
16	MI-89	246	164	151	92	92	90	90	90	82	82	No candidate CNV detected
17	MI-91	71	17	7	1	1	1	1	1	1	1	No candidate CNV detected
18	MI_180	1209	713	703	273	272	251	198	198	167	167	No candidate CNV detected
19	MI-145	69	23	13	6	5	4	4	4	3	3	HFM1- candidate variant; False CNV call
20	MI-251	1149	630	621	261	261	247	201	201	170	170	No candidate CNV detected
21	MI-194	86	24	13	2	2	2	1	1	1	1	No candidate CNV detected
22	MI-99	118	38	31	7	7	7	3	3	3	3	No candidate CNV detected
23	MI-252	959	586	582	262	262	249	222	222	191	191	No candidate CNV detected
24	MI-151	51	11	2	0	0	0	0	0	0	0	No candidate CNV detected
25	MI-247	987	515	499	155	155	145	111	111	88	88	No candidate CNV detected
26	MI-109	101	36	17	2	2	2	0	0	0	0	No candidate CNV detected
27	MI-100	76	24	14	2	2	2	2	2	2	2	No candidate CNV detected
28	MI-249	1014	544	534	211	211	204	163	163	138	138	No candidate CNV detected
29	MI-244	69	26	14	2	2	2	2	2	2	2	No candidate CNV detected
30	MI-136	42	15	4	1	0	0	0	0	0	0	No candidate CNV detected
31	MI-139	162	115	110	71	71	68	67	67	59	59	No candidate CNV detected
32	MI-105	175	68	60	28	28	28	27	27	27	27	No candidate CNV detected
33	MI-242	2315	1461	1451	571	570	548	503	503	450	449	No candidate CNV detected
34	MI-129	90	22	12	1	1	1	0	0	0	0	No candidate CNV detected
35	MI-213	1533	908	902	331	330	316	278	278	234	234	No candidate CNV detected
36	MI-127	65	20	4	0	0	0	0	0	0	0	No candidate CNV detected
37	MI-157	111	28	18	3	3	3	1	1	1	1	No candidate CNV detected
