# Supplementary material for: Genetic diversity of infertile males in India
Source: Research Square preprint supplement (doi:10.21203/rs.3.rs-7849365/v1), 2025-10-31
Supplement: Supplementary file 3 [file 1ef279991a559260d580adf1.xlsx]

## Sheet: Diagnostic cohort
Supplementary Table 3: List of 120 infertile males tested using targeted sequencing assay
Sr.No.	Sample ID	Phenotype	Genomic coordinate	Gene	Transcript	Exon/ Intron	Variant	Protein change	Variant Type	Depth (x)	Zygosity	Minor allele frequency gnomAD	Variant pathogenicity by in-silico prediction tools	CADD score	Z score/ LOEUF score	Expression Data	OMIM Disease ID	Mode of Inheritance	ACMG-AMP variant classification	Clinvar database	CNV call	STS PCR
1	MI-002	Oligoasthenoteratozoospermia	chr7:g.117306995T>C	CFTR	NM_000492.4	Exon 27	c.4276T>C	p.Ser1426Pro	Missense	1334 (C:768/T:565)	Heterozygous	1.2e-05	PP, MT, S, R, M	27.4	-2.40245	Respiratory tract, exocrine pancreas, intestine, hepatobiliary system, exocrine sweat glands and testis	Congenital bilateral absence of vas deferens #277180 Cystic Fibrosis#219700	AR	Likely Pathogenic	VCV000053937.15	No candidate CNV calls	No Yq microdeletion
			chr7:g.117188660_117188660insTG			Intron 9	7T/12TG		Polymorphism	38	Heterozygous								Polymorphism		No candidate CNV calls	No Yq microdeletion
2	MI-008	Azoospermia	chr3:g.52429432G>T	DNAH1	NM_015512.5	Exon 69	c.11077G>T	p.Glu3693*	Stop-gain variant	2 (T:2)	Homozygous	No frequency data available	No variant pathogenicity data available	No CADD score available	1.21/0.48	Brain, trachea and testis	Spermatogenic failure 18 # 617576 Ciliary dyskinesia, primary, 37 (CILD37)#617577	AR	Likely Pathogenic	Not available	No candidate CNV calls	No Yq microdeletion
3	MI-010	Oligoasthenoteratozoospermia	chr17:g.40001750T>C	KLHL10	NM_152467.5	Exon 3	c.1057T>C	p.Phe353Leu	Missense	134 (C:40/T:94)	Heterozygous	No frequency data available	PP, MT, S, R, M	24.7	2.72/0.31	Testis	Spermatogenic failure 11 # 615081	AD	VUS	Not available	No candidate CNV calls	No Yq microdeletion
4	MI-013	Severe oligoasthenoteratozoospermia	chrX:g.69774548A>G	TEX 11	NM_031276.3	Exon 25	c.2243T>C	p.Val748Ala	Missense	46 (A:2/G:44)	Homozygous	0.000244	PP, S, R, M	15.97	1.81/0.08	Testis	Spermatogenic failure, X-linked 2 #309120	XLR	Benign	VCV000981147.5	No candidate CNV calls	No Yq microdeletion
5	MI-019	Severe oligozoospermia+tetratozoospermia	chr3:g.52413947G>T	DNAH1	NM_015512.5	Exon 48	c.7404G>T	p.Trp2468Cys	Missense	16 (G:14/T:2)	Heterozygous	No frequency data available	MT, S, R, M	25.1	1.21/0.48	Brain, trachea and testis	Spermatogenic failure 18 # 617576 Ciliary dyskinesia, primary, 37 (CILD37)#617577	AR	VUS	Not available	No candidate CNV calls	No Yq microdeletion
6	MI-020	Oligozoospermia+Asthenozoospermia	chr3:g.52431033C>G	DNAH1	NM_015512.5	Exon 73	c.11760C>G	p.His3920Gln	Missense	2 (G:2)	Homozygous	No frequency data available	MT, S, R, M	18.11	1.21/0.48	Brain, trachea and testis	Spermatogenic failure 18 # 617576 Ciliary dyskinesia, primary, 37 (CILD37)#617577	AR	Benign	Not available	No candidate CNV calls	No Yq microdeletion
			chr2:g.48921400 A>T	LHCGR	NM_000233.4	Exon 10	c.910T>A	p.Cys304Ser	Missense	2 (T:2)	Homozygous	No frequency data available	MT, S, R, M	22.8	0.16/0.89	Testis, ovary	Leydig cell hypoplasia with hypergonadotropic hypogonadism #238320, Precocious puberty, male #176410 (AD)	AR	VUS	Not available	No candidate CNV calls	No Yq microdeletion
7	MI-018	Azoospermia	chr17:g.78064148GAC>G	CCDC40	NM_001243342.2	Exon 18	c.3044_3045del	p.Asp1015Glyfs*?	Frameshift truncation	chr17:78064148 :- 62 (G:62) chr17:78064149 :- 13 (A:13) Del: 49 chr17:78064150 :- 13 (G:13) Del: 49	Homozygous	0.004035	No variant pathogenicity data available	2.167	-0.214286	Ovary, brain, lung, kidney, testis, fetal brain, and fetal liver	Ciliary dyskinesia, primary, 15 #613808	AR	Benign	VCV001686546.10	No candidate CNV calls	No Yq microdeletion
8	MI-006	Azoospermia (?Non-obstructive) Sonography of testis suggest small atrophy? Absent seminal vesicles but normal vas deference	No causative variant																		No candidate CNV calls	No Yq microdeletion
9	MI-007	Azoospermia + Hypergonadotropic hypogonadism + Undescended testis in childhood +fatty liver+Normal karyotype 46, XY	No causative variant																		No candidate CNV calls	No Yq microdeletion
10	MI-024	Azoospermia	No causative variant																		No candidate CNV calls	No Yq microdeletion
11	MI-254	Azoospermia (CBAVD)	chr3:g.52418868 A>C	DNAH1	NM_015512.5	Exon 53	c.8389A>C	p.Thr2797Pro	Missense	454 (A:3678/C:87)	Heterozygous	No frequency data available	No variant pathogenicity data available	18.16	1.21/0.48	Brain, trachea and testis	Spermatogenic failure 18 # 617576 Ciliary dyskinesia, primary, 37 (CILD37)#617577	AR	Benign	Not available	No candidate CNV calls	No Yq microdeletion
12	MI-074	Azoospermia	No causative variant																		No candidate CNV calls	No Yq microdeletion
13	MI-250	Azoospermia	No causative variant																		No candidate CNV calls	No Yq microdeletion
14	MI-198	Azoospermia	No causative variant																		No candidate CNV calls	No Yq microdeletion
15	MI-236	Azoospermia	chr9:g.127245284T>C	NR5A1	NM_004959	Exon 7	c.1139A>G	p.(Asp380Gly)	Missense	48 (C:30/T:18)	Heterozygous	No frequency data available	PP, MT, S, R, M	27.6	2.34/0.26	Adrenal gland and lymphoid tissue	Spermatogenic failure 8 #613957; Adrenocortical insufficiency # 612964; Premature ovarian failure 7 #612964	AD	VUS	Not available	No candidate CNV calls	No Yq microdeletion
			chr3:g.52434349T>C	DNAH1	NM_015512.5	Exon 78	c.12685T>C	p.(Ser4229Pro)	Missense	3 (C:2/T:1)	Homozygous	3.2e-05	MT, S, R, M	31	1.21/0.48	Brain, trachea and testis	Spermatogenic failure 18 # 617576 Ciliary dyskinesia, primary, 37 (CILD37)#617577	AR	VUS	Not available	No candidate CNV calls	No Yq microdeletion
16	MI-021	Azoospermia	No causative variant																		No candidate CNV calls	No Yq microdeletion
17	MI-055	Non-obstructive azoospermia	chrX:g.70117336A>G	TEX11	NM_001003811.2	Exon 3	c.61T>C	p.Ser21Pro	Missense	4 (A:2/G:2)	Heterozygous	No frequency data available	PP, S, R, M	10	1.81/0.08	Testis	Spermatogenic failure, X-linked 2 #309120	XLR	Benign	Not available	No candidate CNV calls	No Yq microdeletion
			chr3:g.52400743TC>T	DNAH1	NM_015512.5	Intron 35	c.5611-3del	p.?	Splice region	4 (T/C:2 (2bp del)	Heterozygous	No frequency data available	No variant pathogenicity data available	No CADD score available	1.21/0.48	Brain, trachea and testis	Spermatogenic failure 18 # 617576 Ciliary dyskinesia, primary, 37 (CILD37)#617577	AR	Benign	Not available	No candidate CNV calls	No Yq microdeletion
18	MI-227	Azoospermia	chr7:g.117171152G>A	CFTR	NM_000492.4	Exon 4	c.473G>A	p.Ser158Asn	Missense	723 (A:376/G:347)	Heterozygous	7.2e-05	PP, MT, S, R, M	25.4	-2.40245	Respiratory tract, exocrine pancreas, intestine, hepatobiliary system, exocrine sweat glands and testis	Congenital bilateral absence of vas deferens # 277180; Cystic Fibrosis#602421	AR	Likely Pathogenic	VCV000618959.21	No candidate CNV calls	No Yq microdeletion
			chr7:g.117251704G>A			Exon 20	c.3209G>A	p.Arg1070Gln	Missense	1130 (A:602/G:526/c:2)		0.00061	PP, MT, S, R, M	27.3					Likely Pathogenic	VCV000035866.54	No candidate CNV calls	No Yq microdeletion
19	MI-014	Severe Oligozoospermia	chr9:g.127262527C>T	NR5A1	NM_004959.5	Exon 4	c.712G>A	p.Asp238Asn	Missense	9 (C:2/T:7)	Heterozygous	7.6e-05	PP, S, R, M	20.2	2.34/0.26	Adrenal gland and lymphoid tissue	Spermatogenic failure 8 #613957; Adrenocortical insufficiency # 612964; Premature ovarian failure 7 #612964	AD	Likely Pathogenic	VCV001244229.10	No candidate CNV calls	No Yq microdeletion
20	MI-032	Severe Oligozoospermia	No causative variant																		No candidate CNV calls	No Yq microdeletion
21	MI-126	Severe Oligozoospermia	No variant detection																		No candidate CNV calls	No Yq microdeletion
22	MI-128	Oligozoospermia	chr17:g.78061579C>T	CCDC40	NM_017950.4	Intron 15	c.2619+4C>T	p.?	Splice region	208 (c:75/T:133)	Heterozygous	No frequency data available	No variant pathogenicity data available	0.627	-0.214286	Ovary, brain, lung, kidney, testis, fetal brain, and fetal liver	Ciliary dyskinesia, primary, 15 #613808	AR	VUS	Not available	No candidate CNV calls	No Yq microdeletion
23	MI-223	Oligozoospermia	chr19:g.57743127ACAGCCCAG>A	AURKC	NM_001015878.2	Exon 2	c.94_101del	p.Ser32Hisfs*8	Frameshift	6 [4x (8bp del)]	Heterozygous	0.000138	No variant pathogenicity data available	22.2	0.5/0.73	Testis	Spermatogenic failure 5 # 243060	AR	Likely Pathogenic	Not available	No candidate CNV calls	No Yq microdeletion
			chr3:g.52389070A>G	DNAH1	NM_015512.5	Exon 21	c.3692A>G	p.Gln1231Arg	Missense	4 (A:2/G:2)	Heterozygous	No frequency data available	MT, S, R, M	32	1.21/0.48	Brain, trachea and testis	Spermatogenic failure 18 # 617576 Ciliary dyskinesia, primary, 37 (CILD37)#617577	AR	VUS	Not available	No candidate CNV calls	No Yq microdeletion
24	MI-146	Oligoasthenoteratozoospermia + small testes	No causative variant																		No candidate CNV calls	No Yq microdeletion
25	MI-160	Oligoasthenospermia/Cryptozoospermia	No causative variant																		No candidate CNV calls	No Yq microdeletion
26	MI-005	Asthenozoospermia and Globozoospermia	chr3:g.180332726A>G	CCDC39	NM_181426.2	Exon 20	c.2809A>G	p.(Lys937Glu)	Missense	2 (C:2)	Homozygous	No frequency data available	PP, MT, S, R, M	22.4	0.36/0.75	Lung and testis	Ciliary dyskinesia, primary, 14 #613807	AR	VUS	Not available	No candidate CNV calls	No Yq microdeletion
27	MI-071	Hypospermia + Oligoasthenoteratozoospermia	No causative variant																		No candidate CNV calls	No Yq microdeletion
28	MI-116	Severe Oligoasthenoteratozoospermia	No causative variant																		Yp Microdeletion of TBL1Y gene	No Yq microdeletion
29	MI-001	Asthenoteratozoospermia	No causative variant																		No candidate CNV calls	No Yq microdeletion
30	MI-089	Severe Asthenoteratozoospermia	chr3:g.52430794A>G	DNAH1	NM_015512.5	Exon 72	c.11591A>G	p.Tyr3864Cys	Missense	2 (G:2)	Homozygous	No frequency data available	MT, S, R, M	26.1	1.21/0.48	Brain, trachea and testis	Spermatogenic failure 18 # 617576 Ciliary dyskinesia, primary, 37 (CILD37)#617577	AR	VUS	Not available	No candidate CNV calls	No Yq microdeletion
31	MI-168	Asthenoteratozoospermia	chr3:g.52417985G>A	DNAH1	NM_015512.5	Exon 52	c.8260G>A	p.(Ala2754Thr)	Missense	2 (A:2)	Homozygous	No frequency data available	M, S, R, M	10.64	1.21/0.48	Brain, trachea and testis	Spermatogenic failure 18 # 617576 Ciliary dyskinesia, primary, 37 (CILD37)#617577	AR	VUS	Not available	No candidate CNV calls	No Yq microdeletion
32	MI-097	Asthenoteratozoospermia	chr3:g.52427030CAGAG>C	DNAH1	NM_015512.5	Exon 65	c.10468_10471del	p.(Arg3490Glnfs*4)	Frameshift	564 (560x 4bp del)	Homozygous	8.6e-05	No variant pathogenicity data available	34	1.21/0.48	Brain, trachea and testis	Spermatogenic failure 18 # 617576 Ciliary dyskinesia, primary, 37 (CILD37)#617577	AR	Pathogenic	VCV000578911.8	No candidate CNV calls	No Yq microdeletion
33	MI-016	Teratozoospermia (Immotile=45.1%)	No causative variant																		No candidate CNV calls	No Yq microdeletion
34	MI-093	Teratozoospermia	No causative variant																		No candidate CNV calls	No Yq microdeletion
35	MI-131	Teratozoospermia	chrX:g.69898656C>T	TEX11	NM_031276.3	Exon 16	c.1240G>A	p.Glu414Lys	Missense	2 (T:2)	Homozygous	No frequency data available	PP, S, R, M	20.1	1.81/0.08	Testis	Spermatogenic failure, X-linked 2 #309120	XLR	Likely Benign	Not available	No candidate CNV calls	No Yq microdeletion
36	MI-133	Azoospermia	chr3:g.52395769C>T	DNAH1	NM_015512.5	Exon 30	c.4967C>T	p.Ala1656Val	Missense	46 (C:24/T:22)	Heterozygous	2.2e-05	M, S, R, M	32	1.21/0.48	Brain, trachea and testis	Spermatogenic failure 18 # 617576 Ciliary dyskinesia, primary, 37 (CILD37)#617577	AR	VUS	Not available	No candidate CNV calls	No Yq microdeletion
37	MI-011	Non-obstructive azoospermia	chr9:127245149TCCA>T	NR5A1	NM_004959.5	Exon 7	c.1271_1273del	p.Val424del	In-frame Deletion	4 (2x 3bp del)	Heterozygous	No frequency data available	No variant pathogenicity data available	22	2.34/0.26	Adrenal gland and lymphoid tissue	Spermatogenic failure 8 #613957; Adrenocortical insufficiency # 612964; Premature ovarian failure 7 #612964	AD	Likely Pathogenic	Not available	No candidate CNV calls	No Yq microdeletion
			chr3:g.52400876G>T	DNAH1	NM_015512.5	Exon 36	c.5738G>T	p.Gly1913Va	Missense	2 (T:2)	Heterozygous	No frequency data available	M, S, R, M	26.5	1.21/0.48	Brain, trachea and testis	Spermatogenic failure 18 # 617576 Ciliary dyskinesia, primary, 37 (CILD37)#617577	AR	VUS	Not available	No candidate CNV calls	No Yq microdeletion
			chr3:g.52391724TG>T			Exon 23	c.3955del	p.Glu1319Argfs*19	Frameshift	8 (2x del)	Heterozygous	No frequency data available	No variant pathogenicity data available	No CADD score available					Likely Pathogenic	Not available	No candidate CNV calls	No Yq microdeletion
38	MI-051	Azoospermia	chr17:g.78039387C>T	CCDC40	NM_001243342.2	Exon 10	c.1544C>T	p.Ala515Val	Missense	40 (C:22/G:1/T:17)	Heterozygous	2.8e-05	PP, S, R, M	15.17	-0.214286	Ovary, brain, lung, kidney, testis, fetal brain, and fetal liver	Ciliary dyskinesia, primary, 15 #613808	AR	Likely Benign	VCV000325733.5	No candidate CNV calls	No Yq microdeletion
39	MI-033	Cryptozoospermia	chrX:g.30322807C>A	NR0B1	NM_000475.5	Exon 2	c.1302C>A	p.(Phe434Leu)	Missense	4 (G:2/T:2)	Heterozygous	No frequency data available	PP, MT, S, R, M	22.4	1.08/0.28	Adrenal gland, testis, pituitary, ovary, brain	Adrenal hypoplasia, congenital #300200	XLR	VUS	Not available	No candidate CNV calls	No Yq microdeletion
40	MI-023	Azoospermia	chr7:g.117230422T>A	CFTR	NM_000492.4	Exon 13	c.1695T>A	p(Asp565Glu)	Missense	419 (A:222/T:197)	Heterozygous	No frequency data available	PP, MT, S, R, M	23.7	-2.40245	Respiratory tract, exocrine pancreas, intestine, hepatobiliary system, exocrine sweat glands and testis	Congenital bilateral absence of vas deferens #277180 Cystic Fibrosis#219700	AR	Likely Pathogenic	Not available	No candidate CNV calls	No Yq microdeletion
			chr7:g.117182139A>T			Exon 9	c.1186A>T	p(Asn396Tyr)	Missense	216 (A:108/T:108)	Heterozygous	2e-05	PP, MT, S, R, M	29.2					VUS	VCV000411126.7	No candidate CNV calls	No Yq microdeletion
41	MI-025	Oligoasthenotetratozoospermia	No causative variant																		No candidate CNV calls	No Yq microdeletion
42	MI-026	Hypospermia, oligoasthenoteratozospermia	chr3:g.52415689TAC>T	DNAH1	NM_015512.5	Exon 49	c.7644_7645del	p.Tyr2548*	Frameshift	16 [2x (2bp del)]	Heterozygous	No frequency data available	No variant pathogenicity data available	No CADD score available	1.21/0.48	Brain, trachea and testis	Spermatogenic failure 18 # 617576 Ciliary dyskinesia, primary, 37 (CILD37)#617577	AR	Likely Pathogenic	Not available	No candidate CNV calls	No Yq microdeletion
43	MI-027	Oligoasthenotetratozoospermia	chr3:g.52380755TG>T	DNAH1	NM_015512.5	Exon 11	c.1928del	p.Gly643Valfs*4	Frameshift	2 (G:2)	Heterozygous	No frequency data available	No variant pathogenicity data available	No CADD score available	1.21/0.48	Brain, trachea and testis	Spermatogenic failure 18 # 617576 Ciliary dyskinesia, primary, 37 (CILD37)#617577	AR	Likely Pathogenic	Not available	No candidate CNV calls	No Yq microdeletion
44	MI-028	Azoospermia, secondary hypogonadotrophic hypogonadism	chr3:g.52392012T>C	DNAH1	NM_015512.5	Exon 24	c.4079T>C	p.Ile1360Thr	Missense	4 (T:2)	Heterozygous	No frequency data available	MT, S, R, M	26.2	1.21/0.48	Brain, trachea and testis	Spermatogenic failure 18 # 617576 Ciliary dyskinesia, primary, 37 (CILD37)#617577	AR	VUS	Not available	No candidate CNV calls	No Yq microdeletion
			chr3:g.52429488 G>A			Intron 69	c.11127+6G>A	p.?	Splice region	6 (A:3/G:3)	Heterozygous	No frequency data available	No variant pathogenicity data available	0.0087					Benign	Not available	No candidate CNV calls	No Yq microdeletion
45	MI-031	Azoospermia, secondary hypogonadotrophic hypogonadism	No causative variant																		No candidate CNV calls	No Yq microdeletion
46	MI-034	Cryptozoospermia/OAT	chr3:g.180334482 C>T	CCDC39	NM_181426.2	Exon 18	c.2408G>A	p.Cys803Tyr	Missense	6 (T:6)	Homozygous	0.001308	PP, MT, S, R, M	22.6	0.36/0.75	Lung and testis	Ciliary dyskinesia, primary, 14 #613807	AR	Benign	RCV000862363.16	No candidate CNV calls	No Yq microdeletion
47	MI-035	Oligozoospermia + Asthenozoospermia	No causative variant																		No candidate CNV calls	No Yq microdeletion
48	MI-038	Severe oligoasthenoteratozoospermia	No causative variant																		No candidate CNV calls	No Yq microdeletion
49	MI-040	Severe oligozoospermia and teratozoospermia	chr3:g.180359799T>C	CCDC39	NM_181426.2	Exon 13	c.1856A>G	p.Gln619Arg	Missense	548 (C:280/T:268)	Heterozygous	No frequency data available	PP, MT, S, R, M	25.7	0.36/0.75	Lung and testis	Ciliary dyskinesia, primary, 14 #613807	AR	VUS	Not available	No candidate CNV calls	No Yq microdeletion
50	MI-042	Oligostheroteratozoospermia	chr17:g.78061453 A>G	CCDC40	NM_017950.4	Exon 15	c.2497A>G	p.Met833Val	Missense	20 (A:12/G:8)	Heterozygous	0.000114	PP, S, R, M	15.78	-0.214286	Ovary, brain, lung, kidney, testis, fetal brain, and fetal liver	Ciliary dyskinesia, primary, 15 #613808	AR	VUS	RCV004032258.1	No candidate CNV calls	No Yq microdeletion
51	MI-043	Severe Oligostheroteratozoospermia	chr7:g.117230432T>G	CFTR	NM_000492.4	Exon 13	c.1705T>G	p.Tyr569Asp	Missense	305 (G:177/T:128)	Heterozygous	9.6e-05	PP, MT, S, R, M	28.2	-2.40245	Respiratory tract, exocrine pancreas, intestine, hepatobiliary system, exocrine sweat glands and testis	Congenital bilateral absence of vas deferens #277180 Cystic Fibrosis#219700	AR	Pathogenic	VCV000053352.35	No candidate CNV calls	No Yq microdeletion
			chr7:g.117188660_117188660insTG			Intron 9	7T/12TG		Polymorphism	81 (Ins: 29/ Del:3)	Heterozygous								Polymorphism		No candidate CNV calls	No Yq microdeletion
52	MI-044	Oligoasthenoteratozoospermia	chr9:g.841987G>A	DMRT1	NM_021951.3	Exon 1	c.149G>A	p.Ser50Asn	Missense	2 (A:2)	Homozygous	No frequency data available	PP, S, R, M	18.65	-0.916667	Testis	#602424	AD	VUS	Not available	No candidate CNV calls	No Yq microdeletion
53	MI-046	Severe Oligostheroteratozoospermia	chr15:g.43924421G>A	CATSPER2	NM_172095.4	Exon 12 (In-frame exon)	c.1537C>T	p.Arg513Cys	Missense	292 (A:136/G:156)	Heterozygous	2e-05	PP, MT, S, R, M	29	0.797872	Testis	#607249	AR	VUS	Not available	No candidate CNV calls	No Yq microdeletion
54	MI-048	Severe Oligostheroteratozoospermia	No causative variant																		No candidate CNV calls	No Yq microdeletion
55	MI-049	Asthenoteratozoospermia	No causative variant																		No candidate CNV calls	No Yq microdeletion
56	MI-052	Severe Oligozoospermia	No causative variant																		No candidate CNV calls	No Yq microdeletion
57	MI-054	Severe Oligoasthenozoospermia	chr19:57743421A>T	AURKC	NM_001015878.2	Exon 3	c.125A>T	p.Asp42Val	Missense	166 (A:88/T:78)	Heterozygous	No frequency data available	PP, MT, S, R, M	24.9	0.5/0.73	Testis	Spermatogenic failure 5 # 243060	AR	VUS	Not available	No candidate CNV calls	No Yq microdeletion
58	MI-056	Severe Oligosthenoteratozoospermia	No causative variant																		No candidate CNV calls	No Yq microdeletion
59	MI-057	Severe Oligosthenoteratozoospermia	No causative variant																		No candidate CNV calls	No Yq microdeletion
60	MI-058	Oligoteratozoospermia	No causative variant																		No candidate CNV calls	No Yq microdeletion
61	MI-059	Azoospermia	No causative variant																		No candidate CNV calls	No Yq microdeletion
62	MI-061	Severe Oligosthenoteratozoospermia	chr3:g.52389075G>A	DNAH1	NM_015512.5	Intron 21	c.3693+4G>A	p?	Splice region	2 (A:2)	Homozygous	No frequency data available	No variant pathogenicity data available	0.343	1.21/0.48	Brain, trachea and testis	Spermatogenic failure 18 # 617576 Ciliary dyskinesia, primary, 37 (CILD37)#617577	AR	VUS	VCV002953025.1	No candidate CNV calls	No Yq microdeletion
63	MI-062	Severe Oligozoospermia	No causative variant																		No candidate CNV calls	No Yq microdeletion
64	MI-115	Severe Oligoasthenoteratozoospermia + elevated FSH and testosterone	chr9:g.127255429C>T	NR5A1	NM_004959.5	Intron 5	c.871-1G>A	p.?	Splice region	2 (T:2)	Homozygous	No frequency data available	No variant pathogenicity data available	33	2.34/0.26	Adrenal gland and lymphoid tissue	Spermatogenic failure 8 #613957; Adrenocortical insufficiency # 612964; Premature ovarian failure 7 #612964	AD	Likely Pathogenic	Not available	No candidate CNV calls	No Yq microdeletion
65	MI-228	Anejaculation	chr3:52393395GC>G	DNAH1	NM_015512.5	Exon 26	c.4402del	p.Gln1469Serfs*24	Frameshift	8 (Del 2)	Heterozygous	No frequency data available	MT, S, R, M	No CADD score available	1.21/0.48	Brain, trachea and testis	Spermatogenic failure 18 # 617576 Ciliary dyskinesia, primary, 37 (CILD37)#617577	AR	Likely pathogenic	Not available	No candidate CNV calls	No Yq microdeletion
			chr3:g.52383414A>C			Exon 14	c.2504A>C	p.Asn835Thr	Missense	115 (A:85/C:30)	Heterozygous	No frequency data available	MT, S, R, M	16.7					Benign		No candidate CNV calls	No Yq microdeletion
66	MI-066	Azoospermia, USG scrotum normal. Both FSH and LH high	No causative variant																		No candidate CNV calls	No Yq microdeletion
67	MI-067	Non obstructive azoospermia. USG scrotum is normal. C/H/O epilepsy and currently on medication	No causative variant																		No candidate CNV calls	No Yq microdeletion
68	MI-068	Azoospermia + USG scrotum, s/o bilateral calcificatiob in epididymis	chr7:g.117251692G>A	CFTR	NM_000492.4	Exon 20	c.3197G>A	p.Arg1066His	Missense	1458 (A:700x/G:758x)	Heterozygous	0.000139	PP, MT, S, R, M	32	-2.40245	Respiratory tract, exocrine pancreas, intestine, hepatobiliary system, exocrine sweat glands and testis	Congenital bilateral absence of vas deferens #277180 Cystic Fibrosis#219700	AR	Pathogenic	SCV001578406.5	No candidate CNV calls	No Yq microdeletion
			chr7:g.117251704G>A			Exon 20	c.3209G>A	p.Arg1070Gln	Missense	624 (A:310x/G:314x)		0.004674	PP, MT, S, R, M	27.3					Likely Pathogenic	SCV001180564.4; SCV001169236.1	No candidate CNV calls	No Yq microdeletion
69	MI-070	Azoospermia	chr15:g.43940122C>G	CATSPER2	NM_172095.4	Exon 2	c.138G>C	p.Glu46Asp	Missense	8 (C:4/G:4)	Heterozygous	0.000719	PP, MT, S, R, M	14.42	0.797872	Testis	#607249	AR	Benign	Not available	No candidate CNV calls	No Yq microdeletion
			chr3:g.52433156C>G	DNAH1	NM_015512.5	Exon 76	c.12380C>G	p.Thr4127Ser	Missense	166 (C:86/G:80)	Heterozygous	0.002387	MT, S, R, M	24.8	1.21/0.48	Brain, trachea and testis	Spermatogenic failure 18 # 617576 Ciliary dyskinesia, primary, 37 (CILD37)#617577	AR	Benign	RCV000909099	No candidate CNV calls	No Yq microdeletion
70	MI-076	Azoospermia	chr3:g.52398885G>T	DNAH1	NM_015512.5	Exon 33	c.5368G>T	p.(Val1790Leu)	Missense	2 (T:2)	Homozygous	8.7e-05	MT, S, R, M	18.86	1.21/0.48	Brain, trachea and testis	Spermatogenic failure 18 # 617576 Ciliary dyskinesia, primary, 37 (CILD37)#617577	AR	VUS		No candidate CNV calls	No Yq microdeletion
71	MI-112	Azoospermia	No causative variant																		No candidate CNV calls	No Yq microdeletion
72	MI-082	Azoospermia	chr17:g.78069081T>C	CCDC40	NM_017950.4	Exon 18	c.2852T>C	p.(Leu951Pro)	Missense	4 (c:2/G:1)	Heterozygous	No frequency data available	PP, MT, S, R, M	26.7	-0.214286	Ovary, brain, lung, kidney, testis, fetal brain, and fetal liver	Ciliary dyskinesia, primary, 15 #613808	AR	VUS	Not available	No candidate CNV calls	No Yq microdeletion
73	MI-084	Non-obstructive Azoospermia	No causative variant																		No candidate CNV calls	No Yq microdeletion
74	MI-085	Azoospermia + hypogonadotrophic hypogonadism	chr9:g.127245089T>A	NR5A1	NM_004959.5	Exon 7	c.1334A>T	p.Glu445Val	Missense	2 (A:2)	Homozygous	No frequency data available	PP, MT, S, R, M	27.6	2.34/0.26	Adrenal gland and lymphoid tissue	Spermatogenic failure 8 #613957; Adrenocortical insufficiency # 612964; Premature ovarian failure 7 #612964	AD	VUS	Not available	No candidate CNV calls	No Yq microdeletion
			chr7:g.117254664TAGGAGA>T	CFTR	NM_000492.4	Exon 21	c.3368-2_3371del	p.Gly1123del	Missense	6 (6bp deletion seen)	Heterozygous	No frequency data available	No variant pathogenicity data available	No CADD score available	-2.40245	Respiratory tract, exocrine pancreas, intestine, hepatobiliary system, exocrine sweat glands and testis	Congenital bilateral absence of vas deferens #277180 Cystic Fibrosis#219700	AR	VUS		No candidate CNV calls	No Yq microdeletion
			chr3:g.52426909C>T	DNAH1	NM_015512.5	Exon 65	c.10342C>T	p.Pro3448Ser	Missense	2 (T:2)	Heterozygous	No frequency data available	MT, S, R, M	24.9	1.21/0.48	Brain, trachea and testis	Spermatogenic failure 18 # 617576 Ciliary dyskinesia, primary, 37 (CILD37)#617577	AR	VUS		No candidate CNV calls	No Yq microdeletion
			chr3:g.52434412C>T			Exon 78	c.12748C>T	p.Arg4250*	Missense	149 (C:71/T:78)	Heterozygous	1.6e-05	MT	40					Likely Pathogenic		No candidate CNV calls	No Yq microdeletion
75	MI-087	Azoospermia	No causative variant																		No candidate CNV calls	No Yq microdeletion
76	MI-088	Azoospermia	chr3:g.52381940C>A	DNAH1	NM_015512.5	Exon 12	c.2056C>A	p.Leu686Ile	Missense	2 (A:2)	Homozygous	No frequency data available	MT, S, R, M	19.38	1.21/0.48	Brain, trachea and testis	Spermatogenic failure 18 # 617576 Ciliary dyskinesia, primary, 37 (CILD37)#617577	AR	Benign	Not available	No candidate CNV calls	No Yq microdeletion
77	MI-090	Azoospermia	chr3:g.52409301GC>G	DNAH1	NM_015512.5	Exon 45	c.7037del	p.Pro2346Argfs*12	Frameshift	2 [2bp del]	Homozygous	No frequency data available	No variant pathogenicity data available	29.7	1.21/0.48	Brain, trachea and testis	Spermatogenic failure 18 # 617576 Ciliary dyskinesia, primary, 37 (CILD37)#617577	AR	Likely Pathogenic	Not available	No candidate CNV calls	No Yq microdeletion
78	MI-092	Azoospermia + hypogonadotrophic hypogonadism	chr3:g.52430881T>C	DNAH1	NM_015512.5	Intron 73	c.11611-3T>C	p.?	Splice region	2 (C:2)	Homozygous	No frequency data available	No variant pathogenicity data available	12.66	1.21/0.48	Brain, trachea and testis	Spermatogenic failure 18 # 617576 Ciliary dyskinesia, primary, 37 (CILD37)#617577	AR	Benign	Not available	No candidate CNV calls	No Yq microdeletion
79	MI-094	Azoospermia	No causative variant																		Yp Microdeletion of TBL1Y gene	No Yq microdeletion
80	MI-102	Azoospermia	ch7:g117180210C>G	CFTR	NM_000492.4	Exon 8	c.926C>G	pAla309Gly	Missense	32 (C:18/G:14)	Heterozygous	4.8e-05	PP, MT, S, R, M	23.5	-2.40245	Respiratory tract, exocrine pancreas, intestine, hepatobiliary system, exocrine sweat glands and testis	Congenital bilateral absence of vas deferens #277180 Cystic Fibrosis#219700	AR	Likely Pathogenic	VCV000054086.13	No candidate CNV calls	No Yq microdeletion
			chr7:g.117171152G>A			Exon 4	c.473G>A	p.Ser158Asn	Missense	349 (A:181/G:168)		0.0001	PP, MT, S, R, M	25.4					Likely Pathogenic	VCV000618959.21	No candidate CNV calls	No Yq microdeletion
81	MI-104	Azoospermia	chr3:g.52398865G>A	DNAH1	NM_015512.5	Exon 34	c.5348G>A	p.(Arg1783Gln)	Missense	26 (A:12/G:14)	Heterozygous	0.0001	MT, S, R, M	26	1.21/0.48	Brain, trachea and testis	Spermatogenic failure 18 # 617576 Ciliary dyskinesia, primary, 37 (CILD37)#617577	AR	VUS	VCV000570916.5	No candidate CNV calls	No Yq microdeletion
82	MI-106	Azoospermia	No causative variant																		No candidate CNV calls	No Yq microdeletion
83	MI-113	Azoospermia	No causative variant																		No candidate CNV calls	No Yq microdeletion
84	MI-122	Azoospermia	chr3:g.52379682TG>T	DNAH1	NM_015512.5	Exon 10	c.1618del	p.(Glu541Asnfs*25)	Framshift	2	Heterozygous	No frequency data available	No variant pathogenicity data available	No CADD score available	1.21/0.48	Brain, trachea and testis	Spermatogenic failure 18 # 617576 Ciliary dyskinesia, primary, 37 (CILD37)#617577	AR	Likely Pathogenic	Not available	No candidate CNV calls	No Yq microdeletion
85	MI-125	Azoospermia	chr17:g.39998167A>G	KLHL10	NM_152467.5	Exon 4	c.287A>G	p.(Tyr96Cys)	Missense	138 (A:61/G:76)	Heterozygous	No frequency data available	PP, MT, S, R, M	24.5	2.72/0.31	Testis	Spermatogenic failure 11 # 615081	AD	VUS	Not available	No candidate CNV calls	No Yq microdeletion
86	MI-141	Azoospermia	No causative variant																		No candidate CNV calls	No Yq microdeletion
87	MI-142	Azoospermia	No causative variant																		No candidate CNV calls	No Yq microdeletion
88	MI-143	Azoospermia	No causative variant																		No candidate CNV calls	No Yq microdeletion
89	MI-147	Azoospermia	No causative variant																		No candidate CNV calls	No Yq microdeletion
90	MI-152	Severe Asthenozoospermia	No causative variant																		No candidate CNV calls	No Yq microdeletion
91	MI-153	Azoospermia	No causative variant																		No candidate CNV calls	No Yq microdeletion
92	MI-167	Azoospermia	No causative variant																		No candidate CNV calls	No Yq microdeletion
93	MI-181	Azoospermia	chr7:g.117230432T>G	CFTR	NM_000492.4	Exon 13	c.1705T>G	p.Tyr569Asp	Missense	83 (G:43/T:40)	Heterozygous	9.6e-05	PP, MT, S, R, M	28.2	-2.40245	Respiratory tract, exocrine pancreas, intestine, hepatobiliary system, exocrine sweat glands and testis	Congenital bilateral absence of vas deferens #277180 Cystic Fibrosis#219700	AR	Likely Pathogenic	VCV000053352.35	No candidate CNV calls	No Yq microdeletion
			chr7:g.117188660_117188660insTG			Intron 9	7T/12TG		Polymorphism	46 (38x T:38/Del:8 /Ins:16)									Polymorphism		No candidate CNV calls	No Yq microdeletion
94	MI-185	Azoospermia	No causative variant																		No candidate CNV calls	No Yq microdeletion
95	MI-195	Azoospermia	No causative variant																		No candidate CNV calls	No Yq microdeletion
96	MI-209	Azoospermia	chr9:g.894096 TG>T	DMRT1	NM_021951.3	Exon 3	c.727del	p.Glu243Argfs*11	Missense	4 (G:4/ Del:2)	Heterozygous	No frequency data available	No variant pathogenicity data available	No CADD score available	-0.916667	Testis	#602424	AD	VUS	Not available	No candidate CNV calls	No Yq microdeletion
97	MI-216	Azoospermia	chr3:g.52426870A>T	DNAH1	NM_015512.5	Exon 65	c.10303A>T	p.Thr3435Ser	Missense	2	Homozygous	No frequency data available	MT, S, R, M	25.1	1.21/0.48	Brain, trachea and testis	Spermatogenic failure 18 # 617576 Ciliary dyskinesia, primary, 37 (CILD37)#617577	AR	VUS	Not available	No candidate CNV calls	No Yq microdeletion
98	MI-217	Non-obstructive Azoospermia	chr3:g.52398865G>A	DNAH1	NM_015512.5	Exon 34	c.5348G>A	p.Arg1783Gln	Missense	36 (A:7/G:29)	Heterozygous	0.000121	MT, S, R, M	26	1.21/0.48	Brain, trachea and testis	Spermatogenic failure 18 # 617576 Ciliary dyskinesia, primary, 37 (CILD37)#617577	AR	VUS	Not available	No candidate CNV calls	No Yq microdeletion
99	MI-232	Severe Asthenozoospermia	chr7:g.117149115GA>G	CFTR	NM_000492.4	Exon 3	c.197del	p.(Asn66Ilefs*25)	Frameshift	8 (A:0/G:8) chr7:117149116 (6X A:6/Del:2)	Heterozygous	No frequency data available	No variant pathogenicity data available	No CADD score available	-2.40245	Respiratory tract, exocrine pancreas, intestine, hepatobiliary system, exocrine sweat glands and testis	Congenital bilateral absence of vas deferens #277180 Cystic Fibrosis#219700	AR	Likely Pathogenic	Not available	No candidate CNV calls	No Yq microdeletion
100	MI-237	Azoospermia/Oligoasthenoteratozoospermia	No causative variant																		No candidate CNV calls	No Yq microdeletion
101	MI-240	Azoospermia	chr7:g.117199644ATCT>A	CFTR	NM_000492.4	Exon 11	c.1521_1523del	p.Phe508del	In-frame deletion	268 (Del: 355)	Heterozygous	0.007172	No variant pathogenicity data available	21.2	-2.40245	Respiratory tract, exocrine pancreas, intestine, hepatobiliary system, exocrine sweat glands and testis	Congenital bilateral absence of vas deferens #277180 Cystic Fibrosis#219700	AR	Pathogenic	VCV000007105.168	No candidate CNV calls	No Yq microdeletion
102	MI-253	Non-obstructive Azoospermia	chr3:g.52381853C>G	DNAH1	NM_015512.5	Exon 12	c.1969C>G	p.(Pro657Ala)	Missense	32 (C:14/G:18)	Heterozygous	No frequency data available	MT, S, R, M	20.5	1.21/0.48	Brain, trachea and testis	Spermatogenic failure 18 # 617576 Ciliary dyskinesia, primary, 37 (CILD37)#617577	AR	Benign	VCV000544643.10	No candidate CNV calls	No Yq microdeletion
103	MI-065	Severe Oligozoospermia	No causative variant																		No candidate CNV calls	No Yq microdeletion
104	MI-095	Severe Oligozoospermia	No causative variant																		No candidate CNV calls	No Yq microdeletion
105	MI-144	Severe Oligozoospermia	No causative variant																		No candidate CNV calls	No Yq microdeletion
106	MI-118	Severe Oligoasthenoteratozoospermia + Hypergonadotrophic	No causative variant																		No candidate CNV calls	No Yq microdeletion
107	MI-063	Severe Oligoasthenoteratozoospermia	chr9:g.894076T>G	DMRT1	NM_021951.3	Exon 3	c.703T>G	p.Leu235Val	Missense	2	Homozygous	No frequency data available	PP, MT, S, R, M	14.72	-0.916667	Testis	#602424	AD	Likely Benign	Not available	No candidate CNV calls	No Yq microdeletion
108	MI-069	Severe Oligoasthenoteratozoospermia	chr3:g.180378409A>C	CCDC39	NM_181426.2	Exon 4	c.465T>G	p.Ser155Arg	Missense	207 (A:94/C:113)	Heterozygous	No frequency data available	PP, S, R, M	17.67	0.36/0.75	Lung and testis	Ciliary dyskinesia, primary, 14 #613807	AR	Likely Benign	Not available	No candidate CNV calls	No Yq microdeletion
109	MI-073	Severe Oligoasthenoteratozoospermia	chr3:g.52365167AC>A	DNAH1	NM_015512.5	Exon 7	c.879del	p.(Pro293Profs*6)	Frameshift	4	Heterozygous	No frequency data available	No variant pathogenicity data available	No CADD score available	1.21/0.48	Brain, trachea and testis	Spermatogenic failure 18 # 617576 Ciliary dyskinesia, primary, 37 (CILD37)#617577	AR	Likely Pathogenic	Not available	No candidate CNV calls	No Yq microdeletion
110	MI-075	Severe Oligoasthenoteratozoospermia	chr9:g.127265493A>G	NR5A1	NM_004959.5	Exon 3	c.109T>C	p.(Phe37Leu)	Missense	2	Homozygous	No frequency data available	PP, MT, S, R, M	26.6	2.34/0.26	Adrenal gland and lymphoid tissue	Spermatogenic failure 8 #613957; Adrenocortical insufficiency # 612964; Premature ovarian failure 7 #612964	AD	Likely Pathogenic	Not available	No candidate CNV calls	No Yq microdeletion
111	MI-078	Severe Oligoasthenoteratozoospermia	chr3:g.52429427C>T	DNAH1	NM_015512.5	Exon 69	c.11072C>T	p.(Ala3691Val)	Missense	2	Homozygous	4e-06	MT, S, R, M	28.4	1.21/0.48	Brain, trachea and testis	Spermatogenic failure 18 # 617576 Ciliary dyskinesia, primary, 37 (CILD37)#617577	AR	VUS	Not available	No candidate CNV calls	No Yq microdeletion
112	MI-096	Severe Oligoasthenoteratozoospermia	chr7:g.117305539TA>T	CFTR	NM_000492.4	Exon 25	c.4167del	p.Lys1389Asnfs*9	Frameshift	8X (A:6/Del2)	Heterozygous	No frequency data available	No variant pathogenicity data available	No CADD score available	-2.40245	Respiratory tract, exocrine pancreas, intestine, hepatobiliary system, exocrine sweat glands and testis	Congenital bilateral absence of vas deferens #277180 Cystic Fibrosis#219700	AR	Likely Pathogenic	Not available	No candidate CNV calls	No Yq microdeletion
113	MI-098	Severe Oligoasthenoteratozoospermia	No causative variant																		No candidate CNV calls	No Yq microdeletion
114	MI-101	Severe Oligoasthenoteratozoospermia	No causative variant																		No candidate CNV calls	No Yq microdeletion
115	MI-103	Severe Oligoasthenoteratozoospermia	chr7:g.117176637T>C	CFTR	NM_000492.4	Exon 7	c.779T>C	p.Val260Ala	Missense	2 (2)	Homozygous	4e-06	PP, MT, S, R, M	18.16	-2.40245	Respiratory tract, exocrine pancreas, intestine, hepatobiliary system, exocrine sweat glands and testis	Congenital bilateral absence of vas deferens #277180 Cystic Fibrosis#219700	AR	VUS	Not available	No candidate CNV calls	No Yq microdeletion
116	MI-107	Severe Oligoasthenoteratozoospermia	No causative variant																		No candidate CNV calls	No Yq microdeletion
117	MI-108	Severe Oligoasthenoteratozoospermia	chr17:g.78022490TG>T	CCDC40	NM_017950.4	Exon 5	c.787del	p.Glu263Serfs*25	Frameshift	10 (C:10/G:2)	Heterozygous		No variant pathogenicity data available	No CADD score available	-0.214286	Ovary, brain, lung, kidney, testis, fetal brain, and fetal liver	Ciliary dyskinesia, primary, 15 #613808	AR	Likely Pathogenic	Not available	No candidate CNV calls	No Yq microdeletion
118	MI-111	Severe Oligoasthenoteratozoospermia	chr3:g.52409413C>G	DNAH1	NM_015512.5	Exon 45	c.7143C>G	p.(Ile2381Met)	Missense	202 (C:106/G:96)	Heterozygous	0.003363	MT, S, R, M	23.7	1.21/0.48	Brain, trachea and testis	Spermatogenic failure 18 # 617576 Ciliary dyskinesia, primary, 37 (CILD37)#617577	AR	Benign	RCV000559059	No candidate CNV calls	No Yq microdeletion
119	MI-114	Severe Oligoasthenoteratozoospermia	chr3:g.52390626C>G	DNAH1	NM_015512.5	Exon 22	c.3694-4C>G	p.?	Missense	72 (C:26/G:46)	Heterozygous	0.001586	No variant pathogenicity data available	5.395	1.21/0.48	Brain, trachea and testis	Spermatogenic failure 18 # 617576 Ciliary dyskinesia, primary, 37 (CILD37)#617577	AR	Benign	RCV000556485	No candidate CNV calls	No Yq microdeletion
120	MI-117	Severe Oligoasthenoteratozoospermia	No causative variant																		No candidate CNV calls	No Yq microdeletion
Polyphen2:	PP
Mutation Taster	MT
SIFT	S
REVEL	R
MVP	M
