# Supplementary material for: Genetic diversity of infertile males in India
Source: Research Square preprint supplement (doi:10.21203/rs.3.rs-7849365/v1), 2025-10-31
Supplement: Supplementary file 4 [file 2d1b40b9ada64322bc907f0a.xlsx]

## Sheet: Karyotype and AZF del test
Supplementary table 2 - Karyotype and Yq microdeletion
Reference number	Karyotype result	Y-microdeletion result		AZFa				AZFb						AZFc				gr/gr		SRY
			SC Edits	sY 82	sY 84	sY 86	sY 746	sY 121	sY 127	sY 128	sY 130	sY 134	sY 143	sY 145	sY160	sY254	sY255	sY 1191	sY 1291
MI-001-P	46,XY	No deletion of 16 STR markers on Yq-chromosome	No microdeletions detected	-	-	-	-	-	-	-	-	-	-	-	-	-	-	-	-	-
MI-002-P	46,XY	No deletion of 16 STR markers on Yq-chromosome	No microdeletions detected	-	-	-	-	-	-	-	-	-	-	-	-	-	-	-	-	-
MI-003-P	46,XY	No deletion of 16 STR markers on Yq-chromosome	No microdeletions detected	-	-	-	-	-	-	-	-	-	-	-	-	-	-	-	-	-
MI-004-P	46,XY	No deletion of 16 STR markers on Yq-chromosome	No microdeletions detected	-	-	-	-	-	-	-	-	-	-	-	-	-	-	-	-	-
MI-005-P	46,XY	No deletion of 16 STR markers on Yq-chromosome	No microdeletions detected	-	-	-	-	-	-	-	-	-	-	-	-	-	-	-	-	-
MI-006-P	46,XY	No deletion of 16 STR markers on Yq-chromosome	No microdeletions detected	-	-	-	-	-	-	-	-	-	-	-	-	-	-	-	-	-
MI-007-P	46,XY	No deletion of 16 STR markers on Yq-chromosome	No microdeletions detected	-	-	-	-	-	-	-	-	-	-	-	-	-	-	-	-	-
MI-008-P	46,XY	No deletion of 16 STR markers on Yq-chromosome	No microdeletions detected	-	-	-	-	-	-	-	-	-	-	-	-	-	-	-	-	-
MI-009-P	46,XY	No deletion of 16 STR markers on Yq-chromosome	No microdeletions detected	-	-	-	-	-	-	-	-	-	-	-	-	-	-	-	-	-
MI-010-P	46,XY	No deletion of 16 STR markers on Yq-chromosome	No microdeletions detected	-	-	-	-	-	-	-	-	-	-	-	-	-	-	-	-	-
MI-011-P	46,XY	No deletion of 16 STR markers on Yq-chromosome	No microdeletions detected	-	-	-	-	-	-	-	-	-	-	-	-	-	-	-	-	-
MI-012-P	46,XY	Deletion of SY1291 marker (gr/gr) on Yq-chromosome	gr/gr sub-deletion in AZFc	-	-	-	-	-	-	-	-	-	-	-	-	-	-	-	✔️	-
MI-013-P	46,XY	No deletion of 16 STR markers on Yq-chromosome	No microdeletions detected	-	-	-	-	-	-	-	-	-	-	-	-	-	-	-	-	-
MI-014-P	46,XY	No deletion of 16 STR markers on Yq-chromosome	No microdeletions detected	-	-	-	-	-	-	-	-	-	-	-	-	-	-	-	-	-
MI-015-P	46,XY9qh+	Deletion of SY1291 marker (gr/gr) on Yq-chromosome	gr/gr sub-deletion in AZFc	-	-	-	-	-	-	-	-	-	-	-	-	-	-	-	✔️	-
MI-016-P	46,XY	No deletion of 16 STR markers on Yq-chromosome	No microdeletions detected	-	-	-	-	-	-	-	-	-	-	-	-	-	-	-	-	-
MI-017-P	46,XY	No deletion of 16 STR markers on Yq-chromosome	No microdeletions detected	-	-	-	-	-	-	-	-	-	-	-	-	-	-	-	-	-
MI-018-P	46,XY9qh+	No deletion of 16 STR markers on Yq-chromosome	No microdeletions detected	-	-	-	-	-	-	-	-	-	-	-	-	-	-	-	-	-
MI-019-P	46,XY	No deletion of 16 STR markers on Yq-chromosome	No microdeletions detected	-	-	-	-	-	-	-	-	-	-	-	-	-	-	-	-	-
MI-020-P	46,XY	No deletion of 16 STR markers on Yq-chromosome	No microdeletions detected	-	-	-	-	-	-	-	-	-	-	-	-	-	-	-	-	-
MI-021-P	46,XY9qh+	No deletion of 16 STR markers on Yq-chromosome	No microdeletions detected	-	-	-	-	-	-	-	-	-	-	-	-	-	-	-	-	-
MI-022-P	46,XY	No deletion of 16 STR markers on Yq-chromosome	No microdeletions detected	-	-	-	-	-	-	-	-	-	-	-	-	-	-	-	-	-
MI-023-P	46,XY	No deletion of 16 STR markers on Yq-chromosome	No microdeletions detected	-	-	-	-	-	-	-	-	-	-	-	-	-	-	-	-	-
MI-024-P	46,XY	No deletion of 16 STR markers on Yq-chromosome	No microdeletions detected	-	-	-	-	-	-	-	-	-	-	-	-	-	-	-	-	-
MI-025-P	46,XY	No deletion of 16 STR markers on Yq-chromosome	No microdeletions detected	-	-	-	-	-	-	-	-	-	-	-	-	-	-	-	-	-
MI-026-P	46,XY	No deletion of 16 STR markers on Yq-chromosome	No microdeletions detected	-	-	-	-	-	-	-	-	-	-	-	-	-	-	-	-	-
MI-027-P	46,XY	No deletion of 16 STR markers on Yq-chromosome	No microdeletions detected	-	-	-	-	-	-	-	-	-	-	-	-	-	-	-	-	-
MI-028-P	46,XY	No deletion of 16 STR markers on Yq-chromosome	No microdeletions detected	-	-	-	-	-	-	-	-	-	-	-	-	-	-	-	-	-
MI-029-P	46,XY	No deletion of 16 STR markers on Yq-chromosome	No microdeletions detected	-	-	-	-	-	-	-	-	-	-	-	-	-	-	-	-	-
MI-030-P	46,XY	No deletion of 16 STR markers on Yq-chromosome	No microdeletions detected	-	-	-	-	-	-	-	-	-	-	-	-	-	-	-	-	-
MI-031-P	46,XY	No deletion of 16 STR markers on Yq-chromosome	No microdeletions detected	-	-	-	-	-	-	-	-	-	-	-	-	-	-	-	-	-
MI-032-P	46,XY	No deletion of 16 STR markers on Yq-chromosome	No microdeletions detected	-	-	-	-	-	-	-	-	-	-	-	-	-	-	-	-	-
MI-033-P	46,XY9qh+	No deletion of 16 STR markers on Yq-chromosome	No microdeletions detected	-	-	-	-	-	-	-	-	-	-	-	-	-	-	-	-	-
MI-034-P	46,XY	No deletion of 16 STR markers on Yq-chromosome	No microdeletions detected	-	-	-	-	-	-	-	-	-	-	-	-	-	-	-	-	-
MI-035-P	46,XY	No deletion of 16 STR markers on Yq-chromosome	No microdeletions detected	-	-	-	-	-	-	-	-	-	-	-	-	-	-	-	-	-
MI-036-P	46,XY	Deletion of SY1191 marker (gr/gr) on Yq-chromosome	b2/b3 sub-deletion in AZFc	-	-	-	-	-	-	-	-	-	-	-	-	-	-	✔️	-	-
MI-037-P	46,XY	Deletion of SY1291 marker (gr/gr) on Yq-chromosome	gr/gr sub-deletion in AZFc	-	-	-	-	-	-	-	-	-	-	-	-	-	-	-	✔️	-
MI-038-P	46,XY	No deletion of 16 STR markers on Yq-chromosome	No microdeletions detected	-	-	-	-	-	-	-	-	-	-	-	-	-	-	-	-	-
MI-039-P	47,XXY	No deletion of 16 STR markers on Yq-chromosome	No microdeletions detected	-	-	-	-	-	-	-	-	-	-	-	-	-	-	-	-	-
MI-040-P	46,XY	No deletion of 16 STR markers on Yq-chromosome	No microdeletions detected	-	-	-	-	-	-	-	-	-	-	-	-	-	-	-	-	-
MI-041-P	46,X,inv(Y)	No deletion of 16 STR markers on Yq-chromosome	No microdeletions detected	-	-	-	-	-	-	-	-	-	-	-	-	-	-	-	-	-
MI-042-P	46,XY,15pstk+	No deletion of 16 STR markers on Yq-chromosome	No microdeletions detected	-	-	-	-	-	-	-	-	-	-	-	-	-	-	-	-	-
MI-043-P	46,XY9qh+	No deletion of 16 STR markers on Yq-chromosome	No microdeletions detected	-	-	-	-	-	-	-	-	-	-	-	-	-	-	-	-	-
MI-044-P	46,XY	No deletion of 16 STR markers on Yq-chromosome	No microdeletions detected	-	-	-	-	-	-	-	-	-	-	-	-	-	-	-	-	-
MI-045-P	46,XY	Deletion of SY1291 marker (gr/gr), SY134, SY127,SY128,SY121 & SY130 marker (AZFb) on Yq-chromosome	Complete AZFb + gr/gr sub-deletion in AZFc	-	-	-	-	✔️	✔️	✔️	✔️	✔️	-	-	-	-	-	-	✔️	-
MI-046-P	46,XY9qh+	No deletion of 16 STR markers on Yq-chromosome	No microdeletions detected	-	-	-	-	-	-	-	-	-	-	-	-	-	-	-	-	-
MI-047-P	46,XY	No deletion of 16 STR markers on Yq-chromosome	No microdeletions detected	-	-	-	-	-	-	-	-	-	-	-	-	-	-	-	-	-
MI-048-P	46,XY,16qh+	No deletion of 16 STR markers on Yq-chromosome	No microdeletions detected	-	-	-	-	-	-	-	-	-	-	-	-	-	-	-	-	-
MI-049-P	46,XY	No deletion of 16 STR markers on Yq-chromosome	No microdeletions detected	-	-	-	-	-	-	-	-	-	-	-	-	-	-	-	-	-
MI-050-P	46,XY	Deletion of SY1291 , sY1191 marker (gr/gr), SY134, SY127,SSY121 marker (AZFb) on Yq-chromosome	Complete AZFb + b1/b3 sub-deletion in AZFc	-	-	-	-	✔️	✔️	-	-	-	-	-	-	-	-	✔️	✔️	-
MI-051-P	46,XY	No deletion of 16 STR markers on Yq-chromosome	No microdeletions detected	-	-	-	-	-	-	-	-	-	-	-	-	-	-	-	-	-
MI-052-P	46,XY9qh+	No deletion of 16 STR markers on Yq-chromosome	No microdeletions detected	-	-	-	-	-	-	-	-	-	-	-	-	-	-	-	-	-
MI-053-P	46,XY	No deletion of 16 STR markers on Yq-chromosome	No microdeletions detected	-	-	-	-	-	-	-	-	-	-	-	-	-	-	-	-	-
MI-054-P	46,XY	No deletion of 16 STR markers on Yq-chromosome	No microdeletions detected	-	-	-	-	-	-	-	-	-	-	-	-	-	-	-	-	-
MI-055-P	46,XY	No deletion of 16 STR markers on Yq-chromosome	No microdeletions detected	-	-	-	-	-	-	-	-	-	-	-	-	-	-	-	-	-
MI-056-P	46,XY	No deletion of 16 STR markers on Yq-chromosome	No microdeletions detected	-	-	-	-	-	-	-	-	-	-	-	-	-	-	-	-	-
MI-057-P	46,XY,inv(9)(p11q13)	No deletion of 16 STR markers on Yq-chromosome	No microdeletions detected	-	-	-	-	-	-	-	-	-	-	-	-	-	-	-	-	-
MI-058-P	46,XY,16qh+	No deletion of 16 STR markers on Yq-chromosome	No microdeletions detected	-	-	-	-	-	-	-	-	-	-	-	-	-	-	-	-	-
MI-059-P	46,XY	No deletion of 16 STR markers on Yq-chromosome	No microdeletions detected	-	-	-	-	-	-	-	-	-	-	-	-	-	-	-	-	-
MI-060-P	46,XY	Deletion of SY1291 marker (gr/gr) on Yq-chromosome	gr/gr sub-deletion in AZFc	-	-	-	-	-	-	-	-	-	-	-	-	-	-	-	✔️	-
MI-061-P	46,XY	No deletion of 16 STR markers on Yq-chromosome	No microdeletions detected	-	-	-	-	-	-	-	-	-	-	-	-	-	-	-	-	-
MI-062-P	46,XY	No deletion of 16 STR markers on Yq-chromosome	No microdeletions detected	-	-	-	-	-	-	-	-	-	-	-	-	-	-	-	-	-
MI-063-P	46,XY9qh+	No deletion of 16 STR markers on Yq-chromosome	No microdeletions detected	-	-	-	-	-	-	-	-	-	-	-	-	-	-	-	-	-
MI-064-P	46,XY	No deletion of 16 STR markers on Yq-chromosome	No microdeletions detected	-	-	-	-	-	-	-	-	-	-	-	-	-	-	-	-	-
MI-065-P	46,XY	No deletion of 16 STR markers on Yq-chromosome	No microdeletions detected	-	-	-	-	-	-	-	-	-	-	-	-	-	-	-	-	-
MI-066-P	46,XY	No deletion of 16 STR markers on Yq-chromosome	No microdeletions detected	-	-	-	-	-	-	-	-	-	-	-	-	-	-	-	-	-
MI-067-P	46,XY	No deletion of 16 STR markers on Yq-chromosome	No microdeletions detected	-	-	-	-	-	-	-	-	-	-	-	-	-	-	-	-	-
MI-068-P	46,XY	No deletion of 16 STR markers on Yq-chromosome	No microdeletions detected	-	-	-	-	-	-	-	-	-	-	-	-	-	-	-	-	-
MI-069-P	46,XY	No deletion of 16 STR markers on Yq-chromosome	No microdeletions detected	-	-	-	-	-	-	-	-	-	-	-	-	-	-	-	-	-
MI-070-P	46,XY	No deletion of 16 STR markers on Yq-chromosome	No microdeletions detected	-	-	-	-	-	-	-	-	-	-	-	-	-	-	-	-	-
MI-071-P	46,XY	No deletion of 16 STR markers on Yq-chromosome	No microdeletions detected	-	-	-	-	-	-	-	-	-	-	-	-	-	-	-	-	-
MI-072-P	46,XY	Deletion of SY1291 marker (gr/gr) on Yq-chromosome	gr/gr sub-deletion in AZFc	-	-	-	-	-	-	-	-	-	-	-	-	-	-	-	✔️	-
MI-073-P	46,XY	No deletion of 16 STR markers on Yq-chromosome	No microdeletions detected	-	-	-	-	-	-	-	-	-	-	-	-	-	-	-	-	-
MI-074-P	46,XY	No deletion of 16 STR markers on Yq-chromosome	No microdeletions detected	-	-	-	-	-	-	-	-	-	-	-	-	-	-	-	-	-
MI-075-P	46,XY9qh+	No deletion of 16 STR markers on Yq-chromosome	No microdeletions detected	-	-	-	-	-	-	-	-	-	-	-	-	-	-	-	-	-
MI-076-P	46,XY	No deletion of 16 STR markers on Yq-chromosome	No microdeletions detected	-	-	-	-	-	-	-	-	-	-	-	-	-	-	-	-	-
MI-077-P	46,XY	No deletion of 16 STR markers on Yq-chromosome	No microdeletions detected	-	-	-	-	-	-	-	-	-	-	-	-	-	-	-	-	-
MI-078-P	46,XY	No deletion of 16 STR markers on Yq-chromosome	No microdeletions detected	-	-	-	-	-	-	-	-	-	-	-	-	-	-	-	-	-
MI-079-P	46,XY	No deletion of 16 STR markers on Yq-chromosome	No microdeletions detected	-	-	-	-	-	-	-	-	-	-	-	-	-	-	-	-	-
MI-080-P	46,XY9qh+	Deletion of SY255-126 marker (AZFC) on Yq-chromosome	gr/gr sub-deletion in AZFc	-	-	-	-	-	-	-	-	-	-	-	-	-	✔️	-	-	-
MI-081-P	46,XY	No deletion of 16 STR markers on Yq-chromosome	No microdeletions detected	-	-	-	-	-	-	-	-	-	-	-	-	-	-	-	-	-
MI-082-P	46,XY,inv(9)(p11q13)	No deletion of 16 STR markers on Yq-chromosome	No microdeletions detected	-	-	-	-	-	-	-	-	-	-	-	-	-	-	-	-	-
MI-083-P	46,XY	Deletion of SY1291 marker (gr/gr) on Yq-chromosome	gr/gr sub-deletion in AZFc	-	-	-	-	-	-	-	-	-	-	-	-	-	-	-	✔️	-
MI-084-P	46,XY	No deletion of 16 STR markers on Yq-chromosome	No microdeletions detected	-	-	-	-	-	-	-	-	-	-	-	-	-	-	-	-	-
MI-085-P	46,XY	No deletion of 16 STR markers on Yq-chromosome	No microdeletions detected	-	-	-	-	-	-	-	-	-	-	-	-	-	-	-	-	-
MI-086-P	46,XY	No deletion of 16 STR markers on Yq-chromosome	No microdeletions detected	-	-	-	-	-	-	-	-	-	-	-	-	-	-	-	-	-
MI-087-P	46,XY	No deletion of 16 STR markers on Yq-chromosome	No microdeletions detected	-	-	-	-	-	-	-	-	-	-	-	-	-	-	-	-	-
MI-088-P	46,XY	No deletion of 16 STR markers on Yq-chromosome	No microdeletions detected	-	-	-	-	-	-	-	-	-	-	-	-	-	-	-	-	-
MI-089-P	46,XY	No deletion of 16 STR markers on Yq-chromosome	No microdeletions detected	-	-	-	-	-	-	-	-	-	-	-	-	-	-	-	-	-
MI-090-P	46,XY	No deletion of 16 STR markers on Yq-chromosome	No microdeletions detected	-	-	-	-	-	-	-	-	-	-	-	-	-	-	-	-	-
MI-091-P	46,XY	No deletion of 16 STR markers on Yq-chromosome	No microdeletions detected	-	-	-	-	-	-	-	-	-	-	-	-	-	-	-	-	-
MI-092-P	46,XY	No deletion of 16 STR markers on Yq-chromosome	No microdeletions detected	-	-	-	-	-	-	-	-	-	-	-	-	-	-	-	-	-
MI-093-P	46,XY	No deletion of 16 STR markers on Yq-chromosome	No microdeletions detected	-	-	-	-	-	-	-	-	-	-	-	-	-	-	-	-	-
MI-094-P	46,XY	No deletion of 16 STR markers on Yq-chromosome	No microdeletions detected	-	-	-	-	-	-	-	-	-	-	-	-	-	-	-	-	-
MI-095-P	46,XY	No deletion of 16 STR markers on Yq-chromosome	No microdeletions detected	-	-	-	-	-	-	-	-	-	-	-	-	-	-	-	-	-
MI-096-P	46,XY	No deletion of 16 STR markers on Yq-chromosome	No microdeletions detected	-	-	-	-	-	-	-	-	-	-	-	-	-	-	-	-	-
MI-097-P	46,XY	No deletion of 16 STR markers on Yq-chromosome	No microdeletions detected	-	-	-	-	-	-	-	-	-	-	-	-	-	-	-	-	-
MI-098-P	46,XY	No deletion of 16 STR markers on Yq-chromosome	No microdeletions detected	-	-	-	-	-	-	-	-	-	-	-	-	-	-	-	-	-
MI-099-P	46,XY	No deletion of 16 STR markers on Yq-chromosome	No microdeletions detected	-	-	-	-	-	-	-	-	-	-	-	-	-	-	-	-	-
MI-100-P	46,XY	No deletion of 16 STR markers on Yq-chromosome	No microdeletions detected	-	-	-	-	-	-	-	-	-	-	-	-	-	-	-	-	-
MI-101-P	46,XY	No deletion of 16 STR markers on Yq-chromosome	No microdeletions detected	-	-	-	-	-	-	-	-	-	-	-	-	-	-	-	-	-
MI-102-P	46,XY	No deletion of 16 STR markers on Yq-chromosome	No microdeletions detected	-	-	-	-	-	-	-	-	-	-	-	-	-	-	-	-	-
MI-103-P	46,XY	No deletion of 16 STR markers on Yq-chromosome	No microdeletions detected	-	-	-	-	-	-	-	-	-	-	-	-	-	-	-	-	-
MI-104-P	46,XY	No deletion of 16 STR markers on Yq-chromosome	No microdeletions detected	-	-	-	-	-	-	-	-	-	-	-	-	-	-	-	-	-
MI-105-P	46,XY	No deletion of 16 STR markers on Yq-chromosome	No microdeletions detected	-	-	-	-	-	-	-	-	-	-	-	-	-	-	-	-	-
MI-106-P	46,XY	No deletion of 16 STR markers on Yq-chromosome	No microdeletions detected	-	-	-	-	-	-	-	-	-	-	-	-	-	-	-	-	-
MI-107-P	46,XY	No deletion of 16 STR markers on Yq-chromosome	No microdeletions detected	-	-	-	-	-	-	-	-	-	-	-	-	-	-	-	-	-
MI-108-P	46,XY	No deletion of 16 STR markers on Yq-chromosome	No microdeletions detected	-	-	-	-	-	-	-	-	-	-	-	-	-	-	-	-	-
MI-109-P	46,XY	No deletion of 16 STR markers on Yq-chromosome	No microdeletions detected	-	-	-	-	-	-	-	-	-	-	-	-	-	-	-	-	-
MI-110-P	46,XY	No deletion of 16 STR markers on Yq-chromosome	No microdeletions detected	-	-	-	-	-	-	-	-	-	-	-	-	-	-	-	-	-
MI-111-P	46,XY	No deletion of 16 STR markers on Yq-chromosome	No microdeletions detected	-	-	-	-	-	-	-	-	-	-	-	-	-	-	-	-	-
MI-112-P	46,XY	No deletion of 16 STR markers on Yq-chromosome	No microdeletions detected	-	-	-	-	-	-	-	-	-	-	-	-	-	-	-	-	-
MI-113-P	46,XY	No deletion of 16 STR markers on Yq-chromosome	No microdeletions detected	-	-	-	-	-	-	-	-	-	-	-	-	-	-	-	-	-
MI-114-P	46,XY	No deletion of 16 STR markers on Yq-chromosome	No microdeletions detected	-	-	-	-	-	-	-	-	-	-	-	-	-	-	-	-	-
MI-115-P	46,XY	No deletion of 16 STR markers on Yq-chromosome	No microdeletions detected	-	-	-	-	-	-	-	-	-	-	-	-	-	-	-	-	-
MI-116-P	46,XY	No deletion of 16 STR markers on Yq-chromosome	No microdeletions detected	-	-	-	-	-	-	-	-	-	-	-	-	-	-	-	-	-
MI-117-P	46,XY	No deletion of 16 STR markers on Yq-chromosome	No microdeletions detected	-	-	-	-	-	-	-	-	-	-	-	-	-	-	-	-	-
MI-118-P	46,XY	No deletion of 16 STR markers on Yq-chromosome	No microdeletions detected	-	-	-	-	-	-	-	-	-	-	-	-	-	-	-	-	-
MI-119-P	48,XXYY	No deletion of 16 STR markers on Yq-chromosome	No microdeletions detected	-	-	-	-	-	-	-	-	-	-	-	-	-	-	-	-	-
MI-120-P	46,XY	No deletion of 16 STR markers on Yq-chromosome	No microdeletions detected	-	-	-	-	-	-	-	-	-	-	-	-	-	-	-	-	-
MI-121-P	46,XY	No deletion of 16 STR markers on Yq-chromosome	No microdeletions detected	-	-	-	-	-	-	-	-	-	-	-	-	-	-	-	-	-
MI-122-P	46,XY	No deletion of 16 STR markers on Yq-chromosome	No microdeletions detected	-	-	-	-	-	-	-	-	-	-	-	-	-	-	-	-	-
MI-123-P	46,XY	No deletion of 16 STR markers on Yq-chromosome	No microdeletions detected	-	-	-	-	-	-	-	-	-	-	-	-	-	-	-	-	-
MI-124-P	46,XY	Deletion of SY1291 marker (gr/gr) on Yq-chromosome	gr/gr sub-deletion in AZFc	-	-	-	-	-	-	-	-	-	-	-	-	-	-	-	✔️	-
MI-125-P	47,XXY	No deletion of 16 STR markers on Yq-chromosome	No microdeletions detected	-	-	-	-	-	-	-	-	-	-	-	-	-	-	-	-	-
MI-126-P	46,XY	No deletion of 16 STR markers on Yq-chromosome	No microdeletions detected	-	-	-	-	-	-	-	-	-	-	-	-	-	-	-	-	-
MI-127-P	46,XY	No deletion of 16 STR markers on Yq-chromosome	No microdeletions detected	-	-	-	-	-	-	-	-	-	-	-	-	-	-	-	-	-
MI-128-P	46,XY	No deletion of 16 STR markers on Yq-chromosome	No microdeletions detected	-	-	-	-	-	-	-	-	-	-	-	-	-	-	-	-	-
MI-129-P	46,XY	No deletion of 16 STR markers on Yq-chromosome	No microdeletions detected	-	-	-	-	-	-	-	-	-	-	-	-	-	-	-	-	-
MI-130-P	46,XY	No deletion of 16 STR markers on Yq-chromosome	No microdeletions detected	-	-	-	-	-	-	-	-	-	-	-	-	-	-	-	-	-
MI-131-P	46,XY	No deletion of 16 STR markers on Yq-chromosome	No microdeletions detected	-	-	-	-	-	-	-	-	-	-	-	-	-	-	-	-	-
MI-132-P	46,XY	No deletion of 16 STR markers on Yq-chromosome	No microdeletions detected	-	-	-	-	-	-	-	-	-	-	-	-	-	-	-	-	-
MI-133-P	46,XY	No deletion of 16 STR markers on Yq-chromosome	No microdeletions detected	-	-	-	-	-	-	-	-	-	-	-	-	-	-	-	-	-
MI-134-P	46,XY	No deletion of 16 STR markers on Yq-chromosome	No microdeletions detected	-	-	-	-	-	-	-	-	-	-	-	-	-	-	-	-	-
MI-135-P	46,XY	No deletion of 16 STR markers on Yq-chromosome	No microdeletions detected	-	-	-	-	-	-	-	-	-	-	-	-	-	-	-	-	-
MI-136-P	46,XY	No deletion of 16 STR markers on Yq-chromosome	No microdeletions detected	-	-	-	-	-	-	-	-	-	-	-	-	-	-	-	-	-
MI-137-P	46,XY	No deletion of 16 STR markers on Yq-chromosome	No microdeletions detected	-	-	-	-	-	-	-	-	-	-	-	-	-	-	-	-	-
MI-138-P	46,XY,inv(9)(p11q13)	No deletion of 16 STR markers on Yq-chromosome	No microdeletions detected	-	-	-	-	-	-	-	-	-	-	-	-	-	-	-	-	-
MI-139-P	46,XY	No deletion of 16 STR markers on Yq-chromosome	No microdeletions detected	-	-	-	-	-	-	-	-	-	-	-	-	-	-	-	-	-
MI-140-P	46,XY	No deletion of 16 STR markers on Yq-chromosome	No microdeletions detected	-	-	-	-	-	-	-	-	-	-	-	-	-	-	-	-	-
MI-141-P	46,XY	No deletion of 16 STR markers on Yq-chromosome	No microdeletions detected	-	-	-	-	-	-	-	-	-	-	-	-	-	-	-	-	-
MI-142-P	46,XY	No deletion of 16 STR markers on Yq-chromosome	No microdeletions detected	-	-	-	-	-	-	-	-	-	-	-	-	-	-	-	-	-
MI-143-P	46,XY	No deletion of 16 STR markers on Yq-chromosome	No microdeletions detected	-	-	-	-	-	-	-	-	-	-	-	-	-	-	-	-	-
MI-144-P	46,XY	No deletion of 16 STR markers on Yq-chromosome	No microdeletions detected	-	-	-	-	-	-	-	-	-	-	-	-	-	-	-	-	-
MI-145-P	46,XY	No deletion of 16 STR markers on Yq-chromosome	No microdeletions detected	-	-	-	-	-	-	-	-	-	-	-	-	-	-	-	-	-
MI-146-P	46,XY	No deletion of 16 STR markers on Yq-chromosome	No microdeletions detected	-	-	-	-	-	-	-	-	-	-	-	-	-	-	-	-	-
MI-147-P	46,XY,inv(9)(p11q13)	No deletion of 16 STR markers on Yq-chromosome	No microdeletions detected	-	-	-	-	-	-	-	-	-	-	-	-	-	-	-	-	-
MI-148-P	46,XY	No deletion of 16 STR markers on Yq-chromosome	No microdeletions detected	-	-	-	-	-	-	-	-	-	-	-	-	-	-	-	-	-
MI-149-P	46,XY	Deletion of SY1291 marker (gr/gr) on Yq-chromosome	gr/gr sub-deletion in AZFc	-	-	-	-	-	-	-	-	-	-	-	-	-	-	-	✔️	-
MI-150-P	46,XY	No deletion of 16 STR markers on Yq-chromosome	No microdeletions detected	-	-	-	-	-	-	-	-	-	-	-	-	-	-	-	-	-
MI-151-P	46,XY	No deletion of 16 STR markers on Yq-chromosome	No microdeletions detected	-	-	-	-	-	-	-	-	-	-	-	-	-	-	-	-	-
MI-152-P	46,XY	No deletion of 16 STR markers on Yq-chromosome	No microdeletions detected	-	-	-	-	-	-	-	-	-	-	-	-	-	-	-	-	-
MI-153-P	46,XY	No deletion of 16 STR markers on Yq-chromosome	No microdeletions detected	-	-	-	-	-	-	-	-	-	-	-	-	-	-	-	-	-
MI-154-P	46,XY9qh+	No deletion of 16 STR markers on Yq-chromosome	No microdeletions detected	-	-	-	-	-	-	-	-	-	-	-	-	-	-	-	-	-
MI-155-P	46,XY	No deletion of 16 STR markers on Yq-chromosome	No microdeletions detected	-	-	-	-	-	-	-	-	-	-	-	-	-	-	-	-	-
MI-156-P	46,XY	No deletion of 16 STR markers on Yq-chromosome	No microdeletions detected	-	-	-	-	-	-	-	-	-	-	-	-	-	-	-	-	-
MI-157-P	46,XY	No deletion of 16 STR markers on Yq-chromosome	No microdeletions detected	-	-	-	-	-	-	-	-	-	-	-	-	-	-	-	-	-
MI-158-P	46,XY	No deletion of 16 STR markers on Yq-chromosome	No microdeletions detected	-	-	-	-	-	-	-	-	-	-	-	-	-	-	-	-	-
MI-159-P	46,XY	No deletion of 16 STR markers on Yq-chromosome	No microdeletions detected	-	-	-	-	-	-	-	-	-	-	-	-	-	-	-	-	-
MI-160-P	46,XY	No deletion of 16 STR markers on Yq-chromosome	No microdeletions detected	-	-	-	-	-	-	-	-	-	-	-	-	-	-	-	-	-
MI-161-P	46,XY	No deletion of 16 STR markers on Yq-chromosome	No microdeletions detected	-	-	-	-	-	-	-	-	-	-	-	-	-	-	-	-	-
MI-162-P	46,XY	No deletion of 16 STR markers on Yq-chromosome	No microdeletions detected	-	-	-	-	-	-	-	-	-	-	-	-	-	-	-	-	-
MI-163-P	46,XY	No deletion of 16 STR markers on Yq-chromosome	No microdeletions detected	-	-	-	-	-	-	-	-	-	-	-	-	-	-	-	-	-
MI-164-P	46,XY	No deletion of 16 STR markers on Yq-chromosome	No microdeletions detected	-	-	-	-	-	-	-	-	-	-	-	-	-	-	-	-	-
MI-165-P	46,XY	No deletion of 16 STR markers on Yq-chromosome	No microdeletions detected	-	-	-	-	-	-	-	-	-	-	-	-	-	-	-	-	-
MI-166-P	46,XY	No deletion of 16 STR markers on Yq-chromosome	No microdeletions detected	-	-	-	-	-	-	-	-	-	-	-	-	-	-	-	-	-
MI-167-P	46,XY	No deletion of 16 STR markers on Yq-chromosome	No microdeletions detected	-	-	-	-	-	-	-	-	-	-	-	-	-	-	-	-	-
MI-168-P	46,XY	No deletion of 16 STR markers on Yq-chromosome	No microdeletions detected	-	-	-	-	-	-	-	-	-	-	-	-	-	-	-	-	-
MI-169-P	46,XY,1qh+,9qh+	No deletion of 16 STR markers on Yq-chromosome	No microdeletions detected	-	-	-	-	-	-	-	-	-	-	-	-	-	-	-	-	-
MI-170-P	46,XY	Deletion of SY1291 marker (gr/gr) on Yq-chromosome	gr/gr sub-deletion in AZFc	-	-	-	-	-	-	-	-	-	-	-	-	-	-	-	✔️	-
MI-171-P	46,XY9qh+	No deletion of 16 STR markers on Yq-chromosome	No microdeletions detected	-	-	-	-	-	-	-	-	-	-	-	-	-	-	-	-	-
MI-172-P	46,XY	No deletion of 16 STR markers on Yq-chromosome	No microdeletions detected	-	-	-	-	-	-	-	-	-	-	-	-	-	-	-	-	-
MI-173-P	46,XY	No deletion of 16 STR markers on Yq-chromosome	No microdeletions detected	-	-	-	-	-	-	-	-	-	-	-	-	-	-	-	-	-
MI-174-P	46,XY9qh+	No deletion of 16 STR markers on Yq-chromosome	No microdeletions detected	-	-	-	-	-	-	-	-	-	-	-	-	-	-	-	-	-
MI-175-P	46,XY	No deletion of 16 STR markers on Yq-chromosome	No microdeletions detected	-	-	-	-	-	-	-	-	-	-	-	-	-	-	-	-	-
MI-176-P	46,XY9qh+	No deletion of 16 STR markers on Yq-chromosome	No microdeletions detected	-	-	-	-	-	-	-	-	-	-	-	-	-	-	-	-	-
MI-177-P	46,XY	No deletion of 16 STR markers on Yq-chromosome	No microdeletions detected	-	-	-	-	-	-	-	-	-	-	-	-	-	-	-	-	-
MI-178-P	46,XY	No deletion of 16 STR markers on Yq-chromosome	No microdeletions detected	-	-	-	-	-	-	-	-	-	-	-	-	-	-	-	-	-
MI-179-P	46,XY	Deletion of SY1291 marker (gr/gr) on Yq-chromosome	gr/gr sub-deletion in AZFc	-	-	-	-	-	-	-	-	-	-	-	-	-	-	-	✔️	-
MI-180-P	46,XY	No deletion of 16 STR markers on Yq-chromosome	No microdeletions detected	-	-	-	-	-	-	-	-	-	-	-	-	-	-	-	-	-
MI-181-P	46,XY9qh+	No deletion of 16 STR markers on Yq-chromosome	No microdeletions detected	-	-	-	-	-	-	-	-	-	-	-	-	-	-	-	-	-
MI-182-P	46,XY	No deletion of 16 STR markers on Yq-chromosome	No microdeletions detected	-	-	-	-	-	-	-	-	-	-	-	-	-	-	-	-	-
MI-183-P	46,XY	No deletion of 16 STR markers on Yq-chromosome	No microdeletions detected	-	-	-	-	-	-	-	-	-	-	-	-	-	-	-	-	-
MI-184-P	46,XY	No deletion of 16 STR markers on Yq-chromosome	No microdeletions detected	-	-	-	-	-	-	-	-	-	-	-	-	-	-	-	-	-
MI-185-P	46,XY	No deletion of 16 STR markers on Yq-chromosome	No microdeletions detected	-	-	-	-	-	-	-	-	-	-	-	-	-	-	-	-	-
MI-186-P	46,XY	Deletion of SY1291 marker (gr/gr) on Yq-chromosome	gr/gr sub-deletion in AZFc	-	-	-	-	-	-	-	-	-	-	-	-	-	-	-	✔️	-
MI-187-P	46,XY	No deletion of 16 STR markers on Yq-chromosome	No microdeletions detected	-	-	-	-	-	-	-	-	-	-	-	-	-	-	-	-	-
MI-188-P	46,XY9qh+	Deletion of SY1191 marker (gr/gr) and AZFb deletion (SY134 and SY 127) on Yq-chromosome	Complete AZFb + b2/b3 sub-deletion in AZFc	-	-	-	-	-	✔️	-	-	✔️	-	-	-	-	-	✔️	-	-
MI-189-P	46,XY9qh+	No deletion of 16 STR markers on Yq-chromosome	No microdeletions detected	-	-	-	-	-	-	-	-	-	-	-	-	-	-	-	-	-
MI-190-P	46,XY9qh+	No deletion of 16 STR markers on Yq-chromosome	No microdeletions detected	-	-	-	-	-	-	-	-	-	-	-	-	-	-	-	-	-
MI-191-P	46,XY9qh+	No deletion of 16 STR markers on Yq-chromosome	No microdeletions detected	-	-	-	-	-	-	-	-	-	-	-	-	-	-	-	-	-
MI-192-P	46,XY	No deletion of 16 STR markers on Yq-chromosome	No microdeletions detected	-	-	-	-	-	-	-	-	-	-	-	-	-	-	-	-	-
MI-193-P	46,XY	No deletion of 16 STR markers on Yq-chromosome	No microdeletions detected	-	-	-	-	-	-	-	-	-	-	-	-	-	-	-	-	-
MI-194-P	46,XY	No deletion of 16 STR markers on Yq-chromosome	No microdeletions detected	-	-	-	-	-	-	-	-	-	-	-	-	-	-	-	-	-
MI-195-P	46,XY9qh+	No deletion of 16 STR markers on Yq-chromosome	No microdeletions detected	-	-	-	-	-	-	-	-	-	-	-	-	-	-	-	-	-
MI-196-P	46,XY	No deletion of 16 STR markers on Yq-chromosome	No microdeletions detected	-	-	-	-	-	-	-	-	-	-	-	-	-	-	-	-	-
MI-197-P	46,XY	Deletion of SY1291 marker (gr/gr) and AZFc deletion (SY254 and SY 255) on Yq-chromosome	Complete AZFc microdeletion	-	-	-	-	-	-	-	-	-	-	-	-	✔️	✔️	-	✔️	-
MI-198-P	46,XY	No deletion of 16 STR markers on Yq-chromosome	No microdeletions detected	-	-	-	-	-	-	-	-	-	-	-	-	-	-	-	-	-
MI-199-P	46,XY	Deletion of SY1291 and SY 1191 markers (gr/gr) and AZFb deletion (SY 134, SY 127 and SY 130) on Yq-chromosome	Complete AZFb + b1/b3 sub-deletion in AZFc	-	-	-	-	-	✔️	-	✔️	✔️	-	-	-	-	-	✔️	✔️	-
MI-200-P	46,XY	No deletion of 16 STR markers on Yq-chromosome	No microdeletions detected	-	-	-	-	-	-	-	-	-	-	-	-	-	-	-	-	-
MI-201-P	46,XY	No deletion of 16 STR markers on Yq-chromosome	No microdeletions detected	-	-	-	-	-	-	-	-	-	-	-	-	-	-	-	-	-
MI-202-P	46,XY	No deletion of 16 STR markers on Yq-chromosome	No microdeletions detected	-	-	-	-	-	-	-	-	-	-	-	-	-	-	-	-	-
MI-203-P	46,XY	No deletion of 16 STR markers on Yq-chromosome	No microdeletions detected	-	-	-	-	-	-	-	-	-	-	-	-	-	-	-	-	-
MI-204-P	46,XY	No deletion of 16 STR markers on Yq-chromosome	No microdeletions detected	-	-	-	-	-	-	-	-	-	-	-	-	-	-	-	-	-
MI-205-P	46,XY	No deletion of 16 STR markers on Yq-chromosome	No microdeletions detected	-	-	-	-	-	-	-	-	-	-	-	-	-	-	-	-	-
MI-206-P	46,XY9qh+	No deletion of 16 STR markers on Yq-chromosome	No microdeletions detected	-	-	-	-	-	-	-	-	-	-	-	-	-	-	-	-	-
MI-207-P	46,XY	No deletion of 16 STR markers on Yq-chromosome	No microdeletions detected	-	-	-	-	-	-	-	-	-	-	-	-	-	-	-	-	-
MI-208-P	46,XY	No deletion of 16 STR markers on Yq-chromosome	No microdeletions detected	-	-	-	-	-	-	-	-	-	-	-	-	-	-	-	-	-
MI-209-P	46,XY	No deletion of 16 STR markers on Yq-chromosome	No microdeletions detected	-	-	-	-	-	-	-	-	-	-	-	-	-	-	-	-	-
MI-210-P	46,XY9qh+	No deletion of 16 STR markers on Yq-chromosome	No microdeletions detected	-	-	-	-	-	-	-	-	-	-	-	-	-	-	-	-	-
MI-211-P	46,XY	No deletion of 16 STR markers on Yq-chromosome	No microdeletions detected	-	-	-	-	-	-	-	-	-	-	-	-	-	-	-	-	-
MI-212-P	46,XY	No deletion of 16 STR markers on Yq-chromosome	No microdeletions detected	-	-	-	-	-	-	-	-	-	-	-	-	-	-	-	-	-
MI-213-P	46,XY9qh+	No deletion of 16 STR markers on Yq-chromosome	No microdeletions detected	-	-	-	-	-	-	-	-	-	-	-	-	-	-	-	-	-
MI-214-P	46,XY	No deletion of 16 STR markers on Yq-chromosome	No microdeletions detected	-	-	-	-	-	-	-	-	-	-	-	-	-	-	-	-	-
MI-215-P	46,XY	No deletion of 16 STR markers on Yq-chromosome	No microdeletions detected	-	-	-	-	-	-	-	-	-	-	-	-	-	-	-	-	-
MI-216-P	46,XY	No deletion of 16 STR markers on Yq-chromosome	No microdeletions detected	-	-	-	-	-	-	-	-	-	-	-	-	-	-	-	-	-
MI-217-P	46,XY9qh+	No deletion of 16 STR markers on Yq-chromosome	No microdeletions detected	-	-	-	-	-	-	-	-	-	-	-	-	-	-	-	-	-
MI-218-P	46,XY	Deletion of SY1291 marker (gr/gr) on Yq-chromosome	gr/gr sub-deletion in AZFc	-	-	-	-	-	-	-	-	-	-	-	-	-	-	-	✔️	-
MI-219-P	46,XY	Deletion of SY1291 marker (gr/gr) on Yq-chromosome	gr/gr sub-deletion in AZFc	-	-	-	-	-	-	-	-	-	-	-	-	-	-	-	✔️	-
MI-220-P	46,XY9qh+	No deletion of 16 STR markers on Yq-chromosome	No microdeletions detected	-	-	-	-	-	-	-	-	-	-	-	-	-	-	-	-	-
MI-221-P	46,XY9qh+	No deletion of 16 STR markers on Yq-chromosome	No microdeletions detected	-	-	-	-	-	-	-	-	-	-	-	-	-	-	-	-	-
MI-222-P	46,XY9qh+	No deletion of 16 STR markers on Yq-chromosome	No microdeletions detected	-	-	-	-	-	-	-	-	-	-	-	-	-	-	-	-	-
MI-223-P	46,XY9qh+	No deletion of 16 STR markers on Yq-chromosome	No microdeletions detected	-	-	-	-	-	-	-	-	-	-	-	-	-	-	-	-	-
MI-224-P	46,XY	No deletion of 16 STR markers on Yq-chromosome	No microdeletions detected	-	-	-	-	-	-	-	-	-	-	-	-	-	-	-	-	-
MI-225-P	46,XY	Deletion of SY1291 and SY1191 markers (gr/gr) on Yq-chromosome	b1/b3 sub-deletion in AZFc	-	-	-	-	-	-	-	-	-	-	-	-	-	-	✔️	✔️	-
MI-226-P	46,XY	Deletion of SY1291 marker (gr/gr) on Yq-chromosome	gr/gr sub-deletion in AZFc	-	-	-	-	-	-	-	-	-	-	-	-	-	-	-	✔️	-
MI-227-P	46,XY9qh+	No deletion of 16 STR markers on Yq-chromosome	No microdeletions detected	-	-	-	-	-	-	-	-	-	-	-	-	-	-	-	-	-
MI-228-P	46,XY9qh+	No deletion of 16 STR markers on Yq-chromosome	No microdeletions detected	-	-	-	-	-	-	-	-	-	-	-	-	-	-	-	-	-
MI-229-P	46,XY	No deletion of 16 STR markers on Yq-chromosome	No microdeletions detected	-	-	-	-	-	-	-	-	-	-	-	-	-	-	-	-	-
MI-230-P	46,XY	No deletion of 16 STR markers on Yq-chromosome	No microdeletions detected	-	-	-	-	-	-	-	-	-	-	-	-	-	-	-	-	-
MI-231-P	46,XY	No deletion of 16 STR markers on Yq-chromosome	No microdeletions detected	-	-	-	-	-	-	-	-	-	-	-	-	-	-	-	-	-
MI-232-P	46,XY	No deletion of 16 STR markers on Yq-chromosome	No microdeletions detected	-	-	-	-	-	-	-	-	-	-	-	-	-	-	-	-	-
MI-233-P	46,XY9qh+	No deletion of 16 STR markers on Yq-chromosome	No microdeletions detected	-	-	-	-	-	-	-	-	-	-	-	-	-	-	-	-	-
MI-234-P	46,XY9qh+	No deletion of 16 STR markers on Yq-chromosome	No microdeletions detected	-	-	-	-	-	-	-	-	-	-	-	-	-	-	-	-	-
MI-235-P	46,XY	Deletion of SY1291 marker (gr/gr) on Yq-chromosome	gr/gr sub-deletion in AZFc	-	-	-	-	-	-	-	-	-	-	-	-	-	-	-	✔️	-
MI-236-P	46,XY	No deletion of 16 STR markers on Yq-chromosome	No microdeletions detected	-	-	-	-	-	-	-	-	-	-	-	-	-	-	-	-	-
MI-237-P	46,XY	No deletion of 16 STR markers on Yq-chromosome	No microdeletions detected	-	-	-	-	-	-	-	-	-	-	-	-	-	-	-	-	-
MI-238-P	46,XY9qh+	No deletion of 16 STR markers on Yq-chromosome	No microdeletions detected	-	-	-	-	-	-	-	-	-	-	-	-	-	-	-	-	-
MI-239-P	46,XY9qh+	Deletion of SY1291 marker (gr/gr) on Yq-chromosome	gr/gr sub-deletion in AZFc	-	-	-	-	-	-	-	-	-	-	-	-	-	-	-	✔️	-
MI-240-P	46,XY9qh+	No deletion of 16 STR markers on Yq-chromosome	No microdeletions detected	-	-	-	-	-	-	-	-	-	-	-	-	-	-	-	-	-
MI-241-P	46,XY9qh+	No deletion of 16 STR markers on Yq-chromosome	No microdeletions detected	-	-	-	-	-	-	-	-	-	-	-	-	-	-	-	-	-
MI-242-P	46,XY	No deletion of 16 STR markers on Yq-chromosome	No microdeletions detected	-	-	-	-	-	-	-	-	-	-	-	-	-	-	-	-	-
MI-243-P	46,XY	No deletion of 16 STR markers on Yq-chromosome	No microdeletions detected	-	-	-	-	-	-	-	-	-	-	-	-	-	-	-	-	-
MI-244-P	46,XY	No deletion of 16 STR markers on Yq-chromosome	No microdeletions detected	-	-	-	-	-	-	-	-	-	-	-	-	-	-	-	-	-
MI-245-P	46,XY	No deletion of 16 STR markers on Yq-chromosome	No microdeletions detected	-	-	-	-	-	-	-	-	-	-	-	-	-	-	-	-	-
MI-246-P	46,XY	No deletion of 16 STR markers on Yq-chromosome	No microdeletions detected	-	-	-	-	-	-	-	-	-	-	-	-	-	-	-	-	-
MI-247-P	46,XY	No deletion of 16 STR markers on Yq-chromosome	No microdeletions detected	-	-	-	-	-	-	-	-	-	-	-	-	-	-	-	-	-
MI-248-P	46,XY	No deletion of 16 STR markers on Yq-chromosome	No microdeletions detected	-	-	-	-	-	-	-	-	-	-	-	-	-	-	-	-	-
MI-249-P	46,XY9qh+	No deletion of 16 STR markers on Yq-chromosome	No microdeletions detected	-	-	-	-	-	-	-	-	-	-	-	-	-	-	-	-	-
MI-250-P	46,XY	No deletion of 16 STR markers on Yq-chromosome	No microdeletions detected	-	-	-	-	-	-	-	-	-	-	-	-	-	-	-	-	-
MI-251-P	46,XY	No deletion of 16 STR markers on Yq-chromosome	No microdeletions detected	-	-	-	-	-	-	-	-	-	-	-	-	-	-	-	-	-
MI-252-P	46,XY9qh+	No deletion of 16 STR markers on Yq-chromosome	No microdeletions detected	-	-	-	-	-	-	-	-	-	-	-	-	-	-	-	-	-
MI-253-P	46,XY	No deletion of 16 STR markers on Yq-chromosome	No microdeletions detected	-	-	-	-	-	-	-	-	-	-	-	-	-	-	-	-	-
MI-254-P	46,XY	No deletion of 16 STR markers on Yq-chromosome	No microdeletions detected
