# Supplementary material for: Genetic diversity of infertile males in India
Source: Research Square preprint supplement (doi:10.21203/rs.3.rs-7849365/v1), 2025-10-31
Supplement: Supplementary file 5 [file 3f20d0c03fe6920e882b55c4.xlsx]

## Sheet: Clinical information
			Clinical parameters
Patient ID	Patient age (Years)	Gender/ Sex	Height (cm)	Weight (kg)	BMI	BSA	Viscosity	Appearence	Agglutination (%n.r.<50%	Volume (ml)	Motility				Count (million/ml)	Total motility (%)	pH	Live cells	Pus cells	Active motile
											None	Poor	Fair	Good
MI-APT-001-P	31	Male	179.832	65	20.1	1.8	Normal	N/A	Absent	2.5	None	-	-	-	32	0	8	-	-	0
MI-KD-002-P	40	Male	155.7	80	33	1.86	N/A	Gelatinous bodies	N/A	2	-	Poor(65%)	-	-	4	35	7.2	N/A	N/A	2.4(Nr. prog. motile=0.05 mill)
MI-AAS-003-P	30	Male	N/A	N/A	N/A	N/A	Viscous	Viscous	-	2.4	-	Poor	-	-	22	15	7.2	N/A	N/A	7.92 million
MI-RC-004-P	31	Male	168	77	27.3	1.9	-	Whitish	-	1.6	-	-	-	-	0	0	8	0	0	0
MI-RC-004-F	63	Male
MI-RC-004-M	57	Female
MI-KM-005-P	36	Male	N/A	N/A	N/A	N/A	Normal	Whitish	15	3	-	-	Fair	-	55(Total count-165 million)	40	8.2	0.8	1-3/hpf	0.05
MI-HS-006-P	31	Male	183	105	31.4	2.31	Normal	Normal	-	0.4	None	-	-	-	0	0	8	0	N/A	0
MI-MP-007-P	32	Male	182	123	37.1	2.49	Normal	-	Absent	2	None	-	-	-	0	0	0	0	2021-05-01	0
MI-MKS-008-P	32	Male	175	63.5	20.7	1.76	Normal	Whitish	-	2	-	-	-	-	Nil	-	-	-	2021-04-03	-
MI-JS-009-P	30	Male	139.7	89	45.6	0.59	N/A	Normal	N/A	3	-	Poor	-	-	0.1	20	7.2	N/A	N/A	0.2
MI-HS-010-P	31	Male	182.8	98	29.3		Normal	N/A	Absent	1.8	-	Poor	-	-	7	10	7.8	-	-	-
MI-MAM-011-P	35	Male	158.496	67	26.7	1.72	0	0	0	2.4	None	-	-	-	0	0	-	0	0	-
MI-NAC-012-P	29	Male	175	85	27.8	2.03	0	N/A	0	3	-	-	Fair	-	5	52	N/A	N/A	N/A	-
MI-DFB-013-P	34	Male	182.88	56	16.7	1.69	0	N/A	0	5.5	-	Poor	-	-	1	20	N/A	N/A	N/A	-
MI-HVN-014-P	44	Male	174	61.1	20.2	1.72	0	-	0	2.4	-	-	-	-	<1	-	-	-	-	-
MI-KPD-015-P	32	Male	164.592	75	27.7	1.85	2+	N/A	0	1.2	-	-	Fair	-	3	47	N/A	N/A	N/A	-
MI-FS-016-P	30	Male	176.784	65	20.8	1.79	1	Greyish White	N/A	2.6	-	-	Fair	-	31	N/A	N/A	N/A	N/A	-
MI-BS-017-P	29	Male	182.88	65	19.4	1.82	Normal	Whitish	N/A	2	None	-	-	-	0	0	Alkaline	0	0	-
MI-HBC-018-P	40	Male	167.64	75	26.7	1.87	0	N/A	0	2.5	None	-	-	-	0	0	Alkaline	0	0	-
MI-PDV-019-P	28	Male	173.736	73	24.2	1.88	0	N/A	0	2.4	-	-	Fair	-	<1	50	N/A	N/A	N/A	-
MI-KJ-020-P	31	Male	167.64	65	23.1	1.74	Normal	Opaque Whitish	Absent	1.2	-	Poor	-	-	1	15	Alkaline	N/A	2021-06-05	-
MI-JTP-021-P	47	Male	-	62.5	-	-	0	N/A	0	1.5	None	-	-	-	0	0	N/A	0	0	-
MI-KJ-022-P	26	Male	173.736	81	26.8	1.98	Normal	Pale Yellow	N/A	0.9	None	-	-	-	0	0	8	0	0	-
MI-RJ-022-F	52	Male
MI-CJ-022-M	48	Female
MI-SBG-023-P	26	Male	158.496	60	23.9	1.63	Normal	Whitish	N/A	Adequate	None	-	-	-	0	0	Alkaline	0	2021-02-01	0
MI-KRR-024-P	31	Male	188.976	55	15.4	1.7	0	N/A	0	2	None	-	-	-	0	0	N/A	0	0	-
MI-DT-025-P	34	Male	169	74.4	26	1.87	N/A	Viscous	-	5	-	Poor	-	-	1	20	N/A	N/A	N/A	0.2
MI-HK-026-P	35	Male	189	107.5	30.1	2.38	N/A	Viscous	N/A	1.4	None	-	-	-	0.1	0	N/A	N/A	N/A	0
MI-VD-027-P	26	Male	155.75	96	39.6	2.04	High	Whitish	N/A	3.2	-	Poor	-	-	2.2	22	8	N/A	2021-03-02	N/A
MI-RV-028-P	33	Male	185.928	101	29.2	2.28	N/A	Normal	N/A	0.6	None	-	-	-	0.2	0	7.2	N/A	N/A	0
MI-RP-029-P	29	Male	176.784	70	22.4	1.85	N/A	Normal	N/A	2.2	None	-	-	-	0.4	0	N/A	N/A	N/A	0
MI-RP-029-F		Female
MI-RP-029-M		Male
MI-PB-030-P	33	Male	173.736	58.5	19.4	1.68	N/A	Normal	N/A	2	None	-	-	-	0	0	N/A	0	0	0
MI-MB-030-F	67	Male
MI-RB-030-M	60	Female
MI-SP-031-P	30	Male	167.64	69	24.6	1.79	N/A	Normal	N/A	2.8	None	-	-	-	0	0	N/A	0	0	0
MI-GMS-032-P	32	Male	172.5	73.5	24.7	1.88	0	-	0	2.8					<1	-	-	-	-	-
MI-SMJ-032-F	50	Male
MI-GMS-032-M	50	Female
MI-NSP-033-P	29	Male	155.448	87.3	36.1	1.94	2+	-	0	1.4	None	-	-	-	<1	-	-	-	-	-
MI-SDP-033-F	58	Male
MI-NSP-033-M	52	Female
MI-KSD-034-P	30	Male	179.832	78	24.1	1.97	0	N/A	0	4	None	-	-	-	<1	<1	N/A	N/A	N/A	0
MI-SMD-035-P	36	Male	179.832	65	20.1	1.8	N/A	Hazy	N/A	2	-	Poor	-	-	5	0.3	Alkaline	N/A	2021-02-01	0.1
MI-BKR-036-P	39	Male	172	79			N/A	N/A	N/A	1.5		Poor			Occaisional (actual count unknown)	N/A	7	N/A	15-20	N/A
MI-NL-037-P	42	Male	161	61	23.4	1.65	-	-	-	-	-	-	-	-	-	-	-	-	-	-
MI-JPZ-038-P	39	Male	170.688	85	29.2	2.01	1+	N/A	N/A	3.2	-	Poor	-	-	1	20	-	-	-	20
MI-PP-039-P	36	Male	180.34	72	22.1	1.9	Normal	Normal	N/A	1	None				0	0	8	0	0	0
MI-ARN-040-P	40	Male	168	62	22	1.7	0	N/A	0	4.8	-	-	Fair	-	3	42	N/A	N/A	N/A	3
MI-KSP-041-P	26	Male	165	85	31.2	1.97	0	N/A	0	2.3					53	0.4	N/A	N/A	N/A	0.4
MI-KSP-041-F (Father)	53	Male
MI-KSP-041-M (Mother)	48	Female
MI-KSP-041-B (Brother)	27	Male
MI-RAD-042-P	26	Male	164	73.5	27.3	1.83	0	N/A	0	2.5	-	-	-	-	7	20	N/A	N/A	N/A	N/A
MI-AKP-043-P	37	Male	167.64	60	21.3	1.67	0	N/A	0	5	-	Poor	-	-	<1	1	N/A	N/A	N/A	1
MI-DGL-044-P	48	Male	164.59	61	22.5	1.67	0	-	0	3.2	-	-	Fair	-	5	45	-	-	-	45
MI-BKS-045-P	26	Male	182.88	75	22.4	1.95	-	-	-	6	None	-	-	-	0	0	-	0	0	0
MI-MAS-046-P	42	Male	161.544	59	22.6	1.63	3+	N/A	0	2	-	Poor	-	-	3	22	-	N/A	N/A	10
MI-HG-047-P	25	Male	170.688	75	25.7	1.89	Normal	Whitish	-	2	None	-	-	-	0	0	-	-	2021-04-03	0
MI-HG-047-F	76	Male
MI-HG-047-M		Female
MI-MTS-048-P	31	Male	-	-	-	-	Viscous	-	Not present	5	-	-	Fair	-	5	35	-	-	Not detected	22
MI-RSV-049-P	32	Male	-	-	-	-	0	Normal	0	4.7	-	-	Fair	-	18	35	-	-	-	25
MI-KB-050-P	32	Male	-	-	-	-	0	Normal	0	4	None	-	-	-	0	0	-	-	-	-
MI-MT-051-P	28	Male	167.6	60	21.4	1.67	-	-	-	2	-	-	-	-	<0.5	15	-	-	8-10 cells	5
MI-MNC-052-P	44	Male	176.784	80	25.6	1.98	1+	-	0	3.5	-	-	-	Good	3	40	-	-	-	30
MI-KKJ-053-P	31	Male	-	-	-	-	0	-	0	1.2	-	-	-	Good	8	42	-	-	-	32
MI-KKJ-053-F	65	Male
MI-KKJ-053-M	62	Female
MI-SBP-054-P	40	Male	-	70	-	-	0	-	0	5	-	-	Fair	-	4	35	-	-	-	30
MI-CN-055-P	30	Male	173.736	65	21.5	1.77	Good	Grey Whitish	-	2	None	-	-	-	-	-	-	-	-	-
MI-SKB-056-P	30	Male	167.64	58	20.6	1.64	0	-	0	2.3	-	Poor	-	-	<1	20	-	-	-	5
MI-SMS-057-P	35	Male	167.64	56	19.9	1.61	3+	-	0	2.4	-	Poor	-	-	<1	15	-	-	-	5
MI-MS-058-P	33	Male	155	83	34.5	1.89	3+	-	0	3.2	-	-	-	Good	9.6	45	-	-	-	35
MI-RJL-059-P	30	Male	161.544	69	26.4	1.76	Viscous			2	None	-	-	-	0	0	-	-	N/A	0
MI-GB-060-P	25	Male	-	-	-	-	2+	-	0	3	None	-	-	-	0	0	-	-	-	-
MI-CR-061-P	36	Male	170	70	24.2	1.82	0	-	0	2	-	-	Fair	-	<1	35	-	-	-	25
MI-VNS-062-P	30	Male	157	64	26	1.67	0	-	0	3.5	-	-	-	Good	<1	40	-	-	-	30
MI-MKS-063-P	40	Male	-	-	-	-	0	-	0	3	-	Poor	-	-	4	15	-	-	-	5
MI-RNBP-064-P	26	Male	158.496	57	22.7	1.58	0	-	0	0.7	-	Poor	-	-	9	20	-	-	-	15
MI-ABT-065-P	29	Male	198.12	82	20.9	2.12	0	-	0	2.7	None	-	-	-	<1	0	-	-	-	0
MI-KJT-066-P	25	Male	-	79	-	-	1+	-	0	2.3	None	-	-	-	NIL	0	-	-	-	0
MI-PC-067-P	25	Male	172	65	22	1.76	Normal	Normal	Absent	2.5	None	-	-	-	0	0	0	0	0	0
MI-SY-068-P	29	Male	170.688	75	25.7	1.89	Normal	Whitish	-	0.5	None	-	-	-	0	0	0	0	0	0
MI-HNP-069-P	39	Male	-	-	-	-	1+	-	0	1	-	Poor	-	-	3	32	-	-	-	15
MI-ANM-070-P	40	Male	167.64	50	17.8	1.53	2+	Normal	0	3.2	None	-	-	-	0	0	-	-	-	-
MI-AR-071-P	43	Male	164.592	75	27.7	1.85	3+	-	0	0.4	-	Poor	-	-	1	20	-	-	-	5
MI-PAB-072-P	32	Male	164.592	55	20.3	1.59	0	-	-	2.5	-	-	Fair	-	3	38	-	-	-	28
MI-VRP-073-P	33	Male	155.448	76	31.5	1.81	0	-	0	5	-	-	Fair	-	<1	35	-	-	-	20
MI-BSL-074-P	36	Male	165	65	23.9	1.73	1+	-	0	2.8	None	-	-	-	NIL	0	-	-	-	0
MI-KBB-075-P	39	Male	173.736	68	22.5	1.81	2+	-	0	2	-	Poor	-	-	<1	15	-	-	-	5
MI-LH-076-P	28	Male	-	-	-	-	2+	-	0	1	None	-	-	-	NIL	0	-	-	-	0
MI-YR-077-P	33	Male	163	105	38.4	2.15
MI-PR-077-M		Female
MI-DR-078-P	42	Male	155.7	-	-	-	3+	-	0	1.8	-	Poor	-	-	2	50	-	-	-	22
MI-BMR-079-P	32	Male	167.64	65	23.1	1.74	0	-	0	2.5	None	-	-	-	NIL	-	-	-	-	-
MI-EGC-080-P	33	Male	170.688	72	24.7	1.85	3+	-	0	0.5	-	Poor	-	-	<1	20	-	-	-	20
MI-RS-081-P	32	Male	158	95	38.1	2.04	0	Grey	-	1.6	-	Poor	-	-	122	20	-	-	-	8
MI-SS-082-P	31	Male	152	52	22.5	1.48	Normal	opaque	-	-	-	-	-	-	45	60	Alkaline	-	12-15	-
MI-VKN-083-P	38	Male	167.64	72	25.8	1.83	1+	-	0	2	-	-	-	-	14	-	-	-	-	-
MI-KKK-084-P	37	Male	173.73	86	28.5	2.04	-	-	-	-	None	-	-	-	-	-	-	--	-	-
MI-NMR-085-P	34	Male	170	65	22.5	1.75	0	-	0	2.1	None	-	-	-	nil	42	-	-	-	-
MI-GHV-086-P	38	Male	170	52	18	1.57	0	-	0	0.5	None	-	-	-	nil	42	-	-	-	-
MI-PV-086-M	70	Female
MI-NV-086-B	41	Male
MI-KMM-087-P	35	Male	176.7	85	27.4	2.04	0	-	0	0.3	None	-	-	-	nil	0	-	-	-	-
MI-SKV-088-P	39	Male	167	65	23.3	1.74	3	-	0	0.6	None	-	-	-	0	0	-	-	-	-
MI-SKSS-089-P	33	Male	158	57	22.8	1.58	1	-	0	2	None	-	-	-	3	35	-	-	-	-
MI-SM-089-B	56	Male
MI-SS-089-M	27	Female
MI-KHP-090-P	35	Male	170	86	29.8	2.02	0	-	0	0.8	None	-	-	-	79	0	-	-	-	-
MI-BSP-091-P	39	Male	170	78	27	1.92	0	-	0	2	None	-	-	-	10	67	-	-	-	-
MI-BSP-091-B	32	Male
MI-SGR-092-P	34	Male	173	73	24.4	1.87	-	whitish	-	-	None	-	-	-	0	0	-	-	-	-
MI-JVC-093-P	30	Male	167	60	21.5		0	-	0	5.2	-	-	Fair	-	11	42	-	-	-	35
MI-SMB-094-P	34	Male	158	55	22	1.55	0	-	0	2	None	-	-	-	0	0	-	-	-	-
MI-THP-095-P	34 Yeras	Male	179	93	29	2.15	0	-	0	2.2			Fair		6.6	30
MI-KKC-096-P	32	Male	164	58	21.6	1.63	0	0	0	1		Poor			<1	<1
MI-MK-097-P	40	Male	170	72	24.9	1.84	0	-	0	3	-	Poor	-	-	60	1	-	-	-	1
MI-KDR-098-P	35	Male	164	57	21.2	1.61	0	-	0	3.5	-	Poor	-	-	1	15	-	-	-	15
MI-VGM-099-P	31	Male	161	65	25.1	1.7	1	0	-	3	None	-	-	-	1	42	-	-	-	-
MI-GDM-099-F	60	Male
MI-LGM-099-M	54	Female
MI-SCP-100-P	33	Male	155	95	39.5	2.02	0	-	-	2					4	30	-	-	-
MI-SCP-100-F	57	Male
MI-SCP-100-B	28	Male
MI-MNP-101	32	Male	155	55	22.9	1.54	3	-	0	0.3	-	-	Fair	-	3	36	-	-	-	20
MI-MHH-102	40	Male	172	37.6	12.7	1.34	3	-	0	0.1	None	-	-	-	NIL	0	-	-	-	-
MI-AGS-103	32	Male	150	84.7	37.6	1.88	0	-	0	1.5	-	Poor	-	-	3	20	-	-	-	15
MI-MPA-104	26	Male	198.12	100	25.5	2.35	0	-	0	2.2	None	-	-	-	NIL	-	-	-	-	-
MI-SGP-105	43	Male	167	61	21.9	1.68	2	-	0	2.2	None	-	-	-	NIL	-	-	-	-	-
MI-SGP-105-F	68	Male
MI-SGP-105-M	65	Female
MI-DBP-106-P	32	Male	170	71	24.6	1.83	-	Graywhite	-	-	None	-	-	-	0	0	-	-	-	-
MI-NT-107-P	29	Male	178	63	19.9	1.76	3	-	0	5.5	-		Fair		22	38	-	-	-	-
MI-PhS-108-P	35	Male	165	62	22.8	1.69	2	-	0	5.5	-	Poor	-	-	10	30	-	-	-	-
MI-PM-109-P	32	Male	182	80	24.2	2.01	1	-	0	3.4	-	-	-	Good	8	45	-	-	-	-
MI-PM-109-M	60	Female
MI-PM-109-B	22	Male
MI-MSS-110-P	32	Male	167	63	22.6	1.71	Normal	White	0	1	-	-	Fair	-	2	50	Alkaline	-	10-12/HPF
MI-ADP-111-P	26	Male	174	85	28.1	2.03	0	-	0	2	-	Poor	-	-	21	20	-	-	-	10
MI-MBM-112-P	37	Male	149	51	23	1.45	0	-	0	2.5	None	-	-	-	Nil	0	-	-	-	-
MI-NJ-113-P	37	Male	155	90	37.5	1.97	Normal	GB+, Debris++	-	6	None	-	-	-	0	0	-	-	-	-
MI-MPR-114-P	32	Male	176	73	23.6	1.89	0	-	0	1.8	-	-	Fair	-	<1	30	-	-	-	-
MI-RBP-115-P	30	Male	182	55	16.6	1.67	0	-	0	4	-	-	Fair	-	3	30	-	-	-	-
MI-HKT-116-P	44	Male	170	85	29.4	2	0	-	0	2.3	-	-	Fair	-	4	38	-	-	-	-
MI-NP-117-P	33	Male	158	61.9	24.8	1.65	2+	-	0	0.2	-	Poor	-	-	1	15	-	-	-	5
MI-JSK-118-P	36	Male	167	60	21.5	1.67	0	-	0	0.7	-	-	-	Good	1	40	-	-	-	-
MI-KM-119-P	31	Male	182	89	26.9	2.12
MI-RDP-120-P	40	Male	170	54	18.7	1.6	3+	-	0	2.6	-	-	Fair	-	3	35	-	-	-	-
MI-ABK-121-P	26	Male	167	91	32.6	2.05	Normal	Whitish	-	2.7ml	-	Poor	-	-	0.48mil/ml	24	7.5	-	-	-
MI-BAC-122-P	36	Male	170	72	24.9	1.84	0	-	0	3	None	-	-	-	NIL	-	-	-	-	-
MI-CMT-123-P	32	Male	176	71	22.9	1.86	0	-	0	2.8	-	-	FAIR	-	2	30	-	-	-	-
MI-HT-123-M	56	Female
MI-MT-123-F	60	Male
MI-VDM-124-P	24	Male	173	78	26.1	1.94	0	-	0	4.5	-	Poor	-	-	3	28	-	-	-	-
MI-PKM-125-P	33	Male	180	101	31.2	2.25	HIGH	WHITISH	-	1.2	NONE	-	-	-	0	0	7.5	-	-	-
MI-NDV-126-P	30	Male	167	68	24.4	1.78	0	-	0	2	-	-	-	Good	7	50	-	-	-	-
MI-SJP-127-P	24	Male	161	60	23.1	1.64	0	-	0	1	NONE	-	-	-	0	0	-	-	-	-
MI-DP-127-M	45	Female
MI-DGP-128-P	29	Male	161	65	25.1	1.7	0	-	0	2.2	-	-	Fair	-	8	32	-	-	-	0.32
MI-SJ-129-P	32	Male	162	75.8	28.9	1.85	normal	normal	-	2.2	None	-	-	-	2.2	0	-	-	-	-
MI-VJ-129-F	60	Male
MI-RMK-130-P	37	Male	173	50	16.7	1.55	3	-	0	1.5	-	-	Fair	-	2	30	-	-	-	0.2
MI-HT-131-P	38	Male	174	135	44.6	2.55	Normal	-	-	-	None	-	-	-	22	5	6	-	-	-
MI-FJ-132-P	27	Male	182	167	50.4	2.91	Normal	Normal	-	3	None	-	-	-	0.2	0	-	-	-	-
MI-FAJ-132-M	48	Female
MI-SM-132-F	50	Male
MI-HBC-133-P	41	Male	182.88	95	28.4	2.2	0	-	0	0.5	None	-	-	-	-	-	-	-	-	-
MI-JG-134-P	40	Male	167.64	50	17.8	1.53	0	-	0	5	None	-	-	-	-	-	-	-	-	-
MI-BG-134-B	35	Male
MI-RRP-135-P	47	Male	182.88	82	24.8	2.04	2	-	0	1.5	-	Poor	-	-	3	20	-	-	-	0.05
MI-SDP-136-P	28	Male	182.88	85	25.4	2.08	0	-	0	6	-	-	Fair	-	7	30	-	-	1-2/HPF	0.3
MI-DP-136-F	54	Male
MI-BP-136-M	53	Female
MI-KVP-137-P	33	Male	164	63	23.4	1.69	3	-	0	4.2	-	-	Fair	-	6	38	-	-	-	28
MI-AAB-138-P	35	Male	170	65	22.5	1.75	0	-	0	2.2	-	-	-	Good	4	42	-	-	-	32
MI- AB-138-F	52	Male
MI- JB-138-M	46	Female
MI-MRP-139-P	34	Male	180	106	32.7	2.3	2+	-	0	2	-	Poor	-	-	<1	30	-	-	-	20
MI-RP-139-F	72	Male
MI-JRG-140-P	30	Male	-	-	-	-	good	clear	-	0.5	None	-	-	-	0.3	1	7.7	-	-	0
MI-BHP-141-P	29	Male	-	-	-	-	Good	Clear	Nil	1.8	None	-	-	-	0	0	7.7	-	-	-
MI-KBS-142-P	34	Male	173.73	91	30.2	2.1	0	-	0	4	None	-	-	-	0	0	-
MI-BJA-143-P	39	Male	167.64	48.8	17.4	1.51	0	-	0	1.3	None	-	-	-	0	0	-
MI-RKP-144-P	42	Male	155.44	78	32.3	1.84	0	-	0	4	-	-	-	Good	6	40	-	-	-	30
MI-KRB-145-P	28	Male	167.64	70	24.9	1.81	3	-	0	2	-	-	-	Good	3	45	-	-	-	30
MI-RPB-145-F	60	Male
MI-CS-146-P	37	Male	155.448	107	44.3	2.15	Normal	Whitish	-	1.6	-	Poor	-	-	1.3	17	7.5	-	Present	9
MI-NRN-147-P	33	Male	173.74	80	26.5	1.96	0	-	0	2.3	None	-	-	-	0	0	-	-	-	-
MI-MPP-148-P	36	Male	170.69	65	22.3	1.76	0	-	0	2	-	-	Fair	-	1	30	-	-	-	10
MI-SVP-149-P	29	Male	168	60	21.3	1.67	0	Opalcent grayish white	0	5.2	-	Poor	-	-	10.4	10	Alkaline	-	-	5
MI-VVP-150-P	40	Male	176.78	68			0	-	0	4	-	Poor	-	-	4	8	-	-	-	0
MI-HPP-151-P	43	Male	167.64	60			0	-	0	2.5	None	-	-	-	0	0	-	-	-	-
MI-PEP-151-F	60	Male
MI-PUP-151-M	55	Female
MI-PS-152-P	35	Male	170.7	80	27.5	1.95	3+	-	0	1	-	Poor	-	-	28	25	-	-	-	5
MI-DHL-153-P	33	Male	167	65	23.3	1.74	-	Whitish	-	8	None	-	-	-	0	0	-	-	-	0
MI-AJM-154-P	46	Male	164.59	74.9	27.6	1.85	0	-	0	2.2	-	Poor	-	-	14	10	-	-	-	6
MI-YG-155-P	47	Male	-	-	-	-
MI-YG-155-F	76	Male	-
MI-YG-155-M	62	Female
MI-SB-156-P	32	Male	-	-	-	-	Viscous	Opaque	-	3	-	Poor	-	-	2.5	20	9	-	-	15
MI-SB-156-F	61	Male	-
MI-SB-156-M	60	Female
MI-SS-157-P	31	Male	-	-	-	-
MI-SS-157-F	51	Male	-
MI-SS-157-M	46	Female
MI-RB-158-P	32	Male	-	-	-	-	Normal	Milky white	Mixed type +	2	-	Poor	-	-	13	22	7.5	-	Occasional	0.2
MI-RB-158-F	65	Male	-
MI-RB-158-M	55	Female
MI-MT-159-P	31	Male	-	-	-	-
MI-MT-159-F	62	Male	-
MI-MT-159-M	47	Female
MI-KKS-160-P	33	Male	-	-	-	-	Good	Clear	-	2	None	-	-	-	0	0	7.2	-	4-5/HPF	-
MI-JMN-161-P	42	Male	160	64	25	1.69	3+	-	0	1.2	-	-	Fair	-	24	20	-	-	-	5
MI-HNS-162-P	38	Male	152.4	55	23.7	1.53	1+	-	0	2	None	-	-	-	0	0	-	-	-	-
MI-NS-162-F	70	Male
MI-SRS-163-P	34	Male	174	78	25.8	1.94	2+	-	0	1	-	-	Fair	-	3	20	-	-	-	10
MI-ADC-164-P	29	Male	176.78	67	21.4	1.81	1+	-	0	2	-	-	Fair	-	3	20	-	-	-	5
MI-DC-164-F		Male
MI-KC-164-M		Female
MI-RUP-165-P	41	Male	170	77	170	77	2+	-	0	1.5	-	-	Fair	-	12	20	-	-	-	10
MI-CIR-166-P	37	Male	169.5	65	22.6	1.75	3+	-	0	1	-	-	Fair	-	7	32	-	-	-	-
MI-167-NBR-P	24	Male	179.83	54.1	16.7	1.64		Opaque	-	3.8	None	-	-	-	0	0	7.5	-	870	0
MI-DPC-168-P	33	Male		63			0	-	0	0.4	-	Poor	-	-	18	5	-	-	-	5
MI-CNM-169-P	39	Male	179.83	104	32.2	2.28	1+	-	0	4.2	-	-	Fair	-	7	25	-	-	-	15
MI-DJP-170-P	31	Male		62			2+	-	0	4.3	-	Poor	-	-	<1	12	-	-	-	5
MI-DJV-171-P	32	Male	167.64	92	32.8	2.07	1+	-	0	2.8	-	-	Fair	-	12	35	-	-	-	32
MI-PPP-172-P	37	Male	161.54	83	31.8	1.93	2+	-	0	1.6	-	Poor	-	-	<1	20	-	-	-	5
MI-PP-172-F	61	Male
MI-MP-172-B	34	Male
MI-KJG-173-P	36	Male	173.74	65	21.5	1.77	3+	-	0	4	-	Poor	-	-	1	25	-	-	-	12
MI-DAS-174-P	27	Male	158.49	48	19.1	1.45	0	-	0	4.2	-	Poor	-	-	<1	20	-	-	-	10
MI-JVG-175-P	27	Male	176.8	79.4	25.4	1.97	0	-	0	1.5	-	Poor	-	-	2	20	-	-	-	10
MI-DDC-176-P	35	Male	160	98	38.3	2.09	0	-	0	6	-	-	-	Good	8	50	-	-	-	40
MI-KKG-177-P	32	Male	179.83	67	20.7	1.83	0	-	0	1.5	-	-	Fair	-	4.5	37	-	-	-	17
MI-JJ-178-P	33	Male					Good	Clear	0	1.5	-	Poor	-	-	7.5	4	7.7	-	-	1
MI-NPP-179-P	38	Male	176.78	89	28.5	2.09	0	-	0	1.4	-	-	Fair	-	4.2	30	-	-	-	10
MI-DJR-180-P	40	Male	182.88	57.8	17.3	1.71	0	-	0	1.2	-	-	Fair	-	11	30	-	-	-	10
MI-DJR-180-M	65	Female
MI-NDS-181-P	38	Male	152.4	70	30.1	1.72	0	-	0	0.2	None	-	-	-	0	0	-	-	-	-
MI-MJB-182-P	49	Male	182.88	70	20.9	1.89	2+	-	0	2.2	-	Poor	-	-	7	20	-	-	-	10
MI-RHJ-183-P	44	Male	170.68	63	21.6	1.73	0	-	0	1.4	-	-	Fair	-	7	30	-	-	-	10
MI-DVG-184-P	44	Male					Good	Clear	-	2	None	-	-	-	0	0	-	-	-	-
MI-VMN-185-P	41	Male	167	79	28.3	1.91	2+	-	0	2	None	-	-	-	0	0	-	-	-	0
MI-SCD-186-P	26	Male	165	44	16.2	1.42	0	-	0	1	None	-	-	-	0	0	-	-	-	0
MI-RDT-187-P	37	Male					Good	Clear	-	1	-	Poor	-	-	10	1	7.7	-	-	0
MI-SMK-188-P	37	Male	158.49	60	23.9	1.63	2+	-	0	4.8	-	Poor	-	-	<1	5	-	-	-	2
MI-NKS-189-P	32	Male	155.75	91	37.5	1.98	0	-	0	3.4	-	-	Fair	-	3	20	-	-	-	10
MI-BRB-190-P	28	Male	155.75	63	26	1.65	1+	-	0	2.4	None	-	-	-	0	0	-	-	-	0
MI-RB-190-M	56	Female
MI-SB-190-B	34	Male
MI-RNS-191-P	39	Male	167.64	60	21.3	1.67	3+	-	0	4.9	-	-	Fair	-	8	25	-	-	-	15
MI-PC-192-P	32	Male	NA	NA	NA	NA	Good	Clear	-	1.5	-	Poor	-	-	5	3	-	-	-	1
MI-JLS-193-P	31	Male	179.83	75	23.2	1.94	2+	-	0	1.9	-	-	Fair	-	3.8	25	-	-	-	10
MI-DKP-194-P	30	Male	152	61	26.4	1.6	2+	-	0	1.5	-	-	Fair	-	<1	30	-	-	-	10
MI-KSP-194-F	61	Male
MI-IKP-194-M	55	Female
MI-NMG-195-P	36	Male	155	53	22.1	1.51	0	-	0	0.2	None	-	-	-	0	0	-	-	-	0
MI-JRR-196-P	34	Male	167.64	91	32.4	2.06	1+	-	0	1.8	-	-	-	Good	6	50	-	-	-	40
MI-MRR-196-B	32	Male
MI-PRR-196-B		Male
MI-VRR-196-M	50	Female
MI-FAM-197-P	34	Male	-	-	-	-	1+	-	0	2.7	-	-	Fair	-	2	32	-	-	-	20
MI-SGG-198-P	32	Male	-	70	-	-	-	-	-	4	None	-	-	-	0	0	-	-	-	0
MI-RRP-199-P	24	Male	-	-	-	-	1+	-	0	4.5	None	-	-	-	0	0	-	-	-	0
MI-RAK-200-P	30	Male	167.64	70	24.9	1.81	0	-	0	4	-	-	Fair	-	28	30	-	-	-	15
MI-GBD-201-P	42	Male	152.4	60	25.8	1.59	2+	-	0	0.4	-	Poor	-	-	2	15	-	-	-	7
MI-DDS-202-P	27	Male	169	63	22.1	1.72	0	-	0	2.2	-	-	-	Good	2	52	-	-	-	42
MI-AKN-203-P	36	Male	167.64	76	27	1.88	0	-	0	3	-	-	Fair	-	4	30	-	-	-	20
MI-AMP-204-P	43	Male	167.64	74.4	26.5	1.86	3+	-	0	2	-	-	Fair	-	<1	20	-	-	-	5
MI-BKP-205-P	27	Male	161.544	78	29.9	1.87	0	-	0	3.8	-	-	-	Good	6	42	-	-	-	32
MI-DSD-206-P	34	Male	167.64	73	26	1.84	2+	-	0	1.8	-	-	Fair	-	<1	30	-	-	-	10
MI-DVH-207-P	32	Male	167	55	19.7	1.6	-	Whitish	0	0.5	None	-	-	-	0	0	-	-	-	0
MI-VRH-207-F	62	Male
MI-PVH-207-M	60	Female
MI-KKB-208-P	27	Male	176.784	80.5	25.8	1.99	0	-	0	1.2	-	-	-	Good	1	42	-	-	-	32
MI-RAP-209-P	41	Male	155.753	65	26.8	1.68	3+	-	0	<0.1	None	-	-	-	0	0	-	-	-	0
MI-BJM-210-P	32	Male	167.64	53	18.9	1.57	0	-	0	1.3	-	Poor	-	-	1	8	-	-	-	5
MI-RMM-211-P	41	Male	164.592	81.7	30.2	1.93	0	-	0	3.5	-	-	Fair	-	3	25	-	-	-	15
MI-VDS-212-P	28	Male	170.688	72.9	25	1.86	0	-	0	2.8	-	-	Fair	-	4	25	-	-	-	15
MI-TSG-213-P	25	Male	185.928	87.7	25.4	2.13	0	-	0	0.8	None	-	-	-	0	0	-	-	-	0
MI-TSG-213-F	51	Male
MI-TSG-213-M	46	Female
MI-NBP-214-P	38	Male	170.688	72	24.7	1.85	0	-	0	1.8	-	-	-	Good	2	45	-	-	-	40
MI-VBM-215-P	28	Male	154	80	33.7	1.85	3+	-	0	1	c	Poor	-	-	<1	15	-	-	-	5
MI-MR-216-P	32	Male	168	70	24.8	1.81	Viscous	-	0	1.5	None	-	-	-	0	0	-	-	-	0
MI-CBS-217-P	40	Male	164.592	60	22.1	1.66	0	-	0	3	None	-	-	-	0	0	-	-	-	0
MI-BRR-218-P	42	Male	141	69.4	34.9	1.65	0	-	0	1.6	-	-	-	Good	1	50	-	-	-	32
MI-DGV-219-P	33	Male	158.496	62	24.7	1.65	3+	-	0	1.7	-	-	-	Good	7	45	-	-	-	32
MI-SDP-220-P	36	Male	167.64	64	22.8	1.73	0	-	0	1.3	-	-	Fair	-	3	30	-	-	-	10
MI-HRM-221-P	32	Male	192.02	94.9	25.7	2.25	3+	-	0	1	-	Poor	-	-	5	20	-	-	-	10
MI-AKM-222-P	40	Male	167.64	69	24.6	1.79	0	-	0	4.8	-	-	-	Good	5	48	-	-	-	32
MI-JKP-223-P	40	Male	173.736	-	-	-	1+	-	0	2	-	-	-	Good	3	48	-	-	-	38
MI-DHP-224-P	35	Male	164.592	77	28.4	1.88	0	-	0	1.9	-	-	Fair	-	4	20	-	-	-	10
MI-HJP-225-P	27	Male	169	82	28.7	1.96	1+	-	0	0.3	None	-	-	-	Nil	0	-	-	-	0
MI-RMS-226-P	35	Male	167	82	29.4	1.95	1+	-	0	1.5	-	-	Fair	-	4	22	-	-	-	14
MI-ARH-227-P	30	Male	158.496	62	24.7	1.65	0	-	0	0.3	None	-	-	-	0	-	-	-	-	-
MI-GRS-228-P	28	Male	155.75	85	35	1.92	N/A	N/A	N/A	N/A	N/A	N/A	N/A	N/A	N/A	N/A	N/A	N/A	N/A	N/A
MI-MDC-229-P	36	Male	182.88	66.4	19.9	1.84	0	-	0	2.8	-	Poor	-	-	2	15	-	-	-	5
MI-JSD-230-P	34	Male	158.496	70	2.8	0.56	2+	-	0	2	-	-	Fair	-	2	25	-	-	-	15
MI-YGK-231-P	41	Male	176.78	80.3	25.7	1.99	0	-	0	2.3	-	-	Fair	-	2	25	-	-	-	15
MI-DKS-232-P	41	Male	177	75	23.9	1.92	1+	-	0	3.5	-	Poor	-	-	20	2	-	-	-	1
MI-MTA-233-P	44	Male	170.68	90	30.9	2.07	1+	-	0	1.6	-	Poor	-	-	2	12	-	-	-	4
MI-HDP-234-P	41	Male	155.75	89	36.7	1.96	0	-	0	3	-	-	-	Good	39	42	-	-	-	22
MI-ARD-235-P	32	Male	173.73	48	15.9	1.52	0	-	0	2	None	-	-	-	0	-	-	-	-	-
MI-BHL-236-P	51	Male	167.64	70	24.9	1.81	1+	-	0	1	None	-	-	-	0	-	-	-	-	-
MI-KJ-237-P	32	Male	161.54	54	20.7	1.56	0	-	0	1.7	None	-	-	-	0	-	-	-	-	-
MI-KKK-238-P	28	Male	167.64	98	34.9	2.14	1+	-	0	1.8	-	Poor	-	-	<1	10	-	-	-	5
MI-KD-239-P	29	Male	176.78	69	22.1	1.84	3+	-	0	1.8	-	Poor	-	-	2	18	-	-	-	10
MI-VMS-240-P	25	Male	164.59	50	18.5	1.51	1+	-	0	1.5	None	-	-	-	0	-	-	-	-	-
MI-JLS-241-P	39	Male	179.832	79	24.4	1.99	2+	-	0	1.8	-	Poor	-	-	1	12	-	-	-	6
MI-HPS-242-P	33	Male	155.75	50	20.6	1.47	1+	-	0	0.9	-	Poor	-	-	1	10	-	-	-	5
MI-HPS-242-F		Male
MI-AKP-243-P	29	Male	188.976	74	20.7	1.97	2+	-	0	4	-	Poor	-	-	8	20	-	-	-	10
MI-LC-244-P	33	Male	155.75	76	31.3	1.81	3+	Greyish yellow	0	2.5	-	-	-	Good	35	43	-	-	-	32
MI-LC-244-F	64	Male
MI-LC-244-M	54	Female
MI-LC-244-B		Male
MI-AMP-245-P	33	Male					3+	-	0	0.8	-	-	Fair	-	12	30	-	-	-	15
MI-SAK-246-P	44	Male	173.736	67.1	22.2	1.8	2+	-	0	2.3	-	-	Fair	-	3	24	-	-	-	14
MI-SAK-246-M	62	Female
MI-SAK-246-B	43	Male
MI-VDH-247-P	37	Male	NA	NA	NA	NA	-	Whitish	0	2.5	None	-	-	-	-	-	-	-	-	-
MI-VDH-247-F	62	Male
MI-VDH-247-M	57	Female
MI-MMB-248-P	29	Male	164.592	74	27.3	1.84	3+	-	0	3.3	-	-	Fair	-	<1	32	-	-	-	22
MI-KKS-249-P	38	Male	152.4	97.6	42	2.03	0	-	0	2.8	None	-	-	-	-	-	-	-	-	-
MI-KKS-249-M		Female
MI-CGM-250-P	41	Male	170	79	27.3	1.93	0	-	0	2	None	-	-	-	-	-	-	-	-	-
MI-JV-251-P	33	Male	179	102	31.8	2.25	Normal	Whitish	-	2.5	None	-	-	-	Nil	Nil	-	-	-	Nil
MI-JV-251-F	61	Male
MI-JV-251-M	55	Female
MI-CNC-252-P	28	Male	5.6 ft inch	72	24.7	1.85	0	-	0	5	-	Poor	-	-	4	30	-	-	-	20
MI-NP-253-P	33	Male	172	89	30.1	2.06	Normal	Opague	-	2	None	-	-	-	Nil	Nil	8	-	-	Nil
MI-AU-254-P	32	Male	N/A								None	-	-	-	Nil	Nil	-	-	-	Nil

## Sheet: Semen morphology
	Sperm Morphology																	Any other relevant findings	Endocrine Results			Clinical history
Patient ID	Normal (%)	Abnormal (%)	Amorphus head (%)	Small oval head (%)	Tapering head (%)	Duplicate head (%)	Pyriform (%)	Midpiece defect (%)	Large oval head (%)	Cytoplasmic droplets (%)	Coiled tail (%)	Broken/acute tail (%)	Round head (%)	Pin head (%)	Mixed defect (%)	Thick tail (%)	Immature cell (%)		FSH (IU/ml)	Testosterone (nmol/L)	LH (miu/ml)	Recreational drug	Anabolic steriod	Protein Shakes	Alcohol	Smoking history	Currently on ART treatment	Family history of male infertility
																						Yes/No	Yes/No	Yes/No	Yes/No	Yes/No	Yes/No	Yes/No
MI-APT-001-P	2	-	-	-	-	-	-	-	-	-	-	-	-	-	-	-	-	Asthenoteratozoospermia	Normal	Normal	Normal	No	No	No	No	No	Yes	No
MI-KD-002-P	2	9.8	Head defects = 98%				N/A	4.08	N/A	N/A	Tail defects = 0%							Oligoasthenoteratozoospermia	N/A	N/A	N/A	No	No	No	No	No	Yes	No
MI-AAS-003-P	1	99	Head defects = 98.98%				N/A	1.02	N/A	N/A	Tail defects = 0%		N/A	N/A	N/A	N/A	N/A	Asthenoteratozoospermia	-	-	-	No	No	No	No	No	Yes	No
MI-RC-004-P	0	0	0	0	0	0	0	0	0	0	0	0	0	0	0	0	0	Non obstructive azoospermia with sertoli cell only syndrome	22.29	319.21 ng/dL	-	No	No	No	No	No	Yes	No
MI-KM-005-P	-	100	25	10	-	-	20	-	-	5	15	-	15	5	5	-	-	Asthenozoospermia and globozoospermia	NA	NA	NA	NA	NA	NA	NA	NA	NA	NA
MI-HS-006-P	0	0	0	0	0	0	0	0	0	0	0	0	0	0	0	0	0	Azoospermia(?Non-obstructive) Sonography of testis suggest small atrophy?absent seminal vesicles but normal vas deference	2.59	2.93	2.64	No	No	No	Yes	No	Yes	No
MI-MP-007-P	0	0	0	0	0	0	0	0	0	0	0	0	0	0	0	0	0	(Azoospermia+Hypergonadotropic hypogonadism+Undescended testis in childhood+fatty liver+Normal karyotype 46,xy	40.68	-	17.95	No	No	No	Yes	Yes	No	No
MI-MKS-008-P	0	0	0	0	0	0	0	0	0	0	0	0	0	0	0	0	0	(ART Therapy eggs freezed,Azoospermic)	12.28	231.4	3.56	No	No	No	No	No	Yes	No
MI-JS-009-P	1	99	95.96	0	0	0	0	4.04	0	0	0	0	0	0	0	0	0	Crytozoospermic/OAT	N/A	N/A	N/A	No	No	No	No	No	Yes(1 failed IVF cycle)	No
MI-HS-010-P	4	96	N/A	N/A	N/A	N/A	N/A	N/A	N/A	N/A	N/A	N/A	N/A	N/A	N/A	N/A	N/A	Oligoasthenoteratozoospermia, 90% immotile sperms	-	303.5	-	No	No	No	No	No	Yes	No
MI-MAM-011-P	0	0	0	0	0	0	0	0	0	0	0	0	0	0	0	0	0	Azoospermia (Obstructive?/?CBAVD)Also had clinical history of pneumonia in childhood	3.65	396.04 ng/dL	3.88	No	No	No	No	No	Yes(Went for TESE biopsy folliwed by ICSI but was unsuccessful)	Yes
MI-NAC-012-P	8		Head defects = 43%				-	25	-	-	0.08		-	-	-	-	-	Severe oligospermia+teratozoospermia	N/A	N/A	N/A	No	No	No	No	Yes(used to eat gutka till 2017)	No	Yes(His sister had undergo IUI)
MI-DFB-013-P	3	97	0.45				N/A	18	N/A	4	0.12		N/A	N/A	N/A	N/A	N/A	Severe oligoasthenoteratozoospermia	-	-	-	No	No	No	No	No	No	Yes(His sister has no child)
M-HVN-014-P	0		Head defects = 0				-	0	0	0	0	0	0	0	0	0		Severe Oligozoospermia	2.68	5.12	6.31	No	No	No	No	No	No	No
MI-KPD-015-P	7	93	Head defects = 41%				N/A	0.22	N/A	4	Tail Defect=14%		N/A	N/A	2	N/A	N/A	Oligozoospermia+Tetratozoospermia	N/A	N/A	N/A	No	No	No	No	Yes (Eats Tobacco)	No	No
MI-FS-016-P	2% Kruger Strict	-	-	-	-	-	-	-	-	-	-	-	-	-	-	-	-	Teratozoospermia (Immotile=45.1%)	N/A	N/A	N/A	No	No	No	No	No	No	Yes
MI-BS-017-P	0	0	0	0	0	0	0	0	0	0	0	0	0	0	0	0	0	(Non obstructive?)azoospermia.Has salty sweat and his brother is detected with pathogenic CFTR mutation.	17.39	1.59	3.76	No	No	No	No	Yes (Chews Tobacco)	No	Yes
MI-HBC-018-P	0	0	0	0	0	0	0	0	0	0	0	0	0	0	0	0	0	Azoospermia	10.8	3.99	5.51	No	No	No	No	Yes (Chews Tobacco)	No	No
MI-PDV-019-P	4	96	45 %					21	N/A	4	12%(duplicate+pin head)		N/A		14	N/A	N/A	Severe oligozoospermia+tetratozoospermia	6.5	4.3	3.9	No	No	No	No	No	No	No
MI-KJ-020-P	92	8	Head= 3% (Large Oval Head					Body= 1%		-	Tail = 4%			N/A	N/A	N/A	N/A	Oligozoospermia+Asthenozoospermia	6.34	3.73	2.48	No	No	No	No	Yes (Chews Tobacco)	Yes (Carried out TESE)	Yes
MI-JTP-021-P	0	0	0	0	0	0	0	0	0	0	0	0	0	0	0	0	0	Azoospermia	2.23	417.82	8.65	No	No	No	No	No	No	Yes
MI-KJ-022-P	0	0	0	0	0	0	0	0	0	0	0	0	0	0	0	0	0	Azoospermia+Varicocele+Bilateral epidydymal cyst	5.74	362.9	2.01	No	No	No	No	No	No	N/A
MI-SBG-023-P	0	0	0	0	0	0	0	0	0	0	0	0	0	0	0	0	0	Azoospermia	27.73	2.35	9.65 (Prolactin= 6.58 ng/ml)	No	No	No	No	Yes (Chews Tobacco)	No	No
MI-KRR-024-P	0	0	0	0	0	0	0	0	0	0	0	0	0	0	0	0	0	Azoospermia	N/A	N/A	N/A	No	No	Yes( currently not consumiing since last3 years	No	No	No	No
MI-DT-025-P	1	99	Head defects = 92.93 %					6.06 %			Tail Defect= 1.01%							Oligoasthenotetratozoospermia	N/A	N/A	N/A	No	No	No	No	No	Yes	No
MI-HK-026-P	1	99	Head defects = 97 % ; Teratoz index = 1%					3 %										Hypospermia, oligoasthenoteratozospermia, right testis seen in inguinal canal	N/A	N/A	N/A	-	-	No	No	No	-	No
MI-VD-027-P	12	86	N/A	0	9	0	2	29	5	10	3	2	5	N/A	N/A	N/A	2	Oligoasthenotetratozoospermia				No	No	No	No	No	No	No
MI-RV-028-P																		Cryptozoospermia	N/A	N/A	N/A	No	No	No	No	No	No	No
MI-RP-029-P			Head defects = 15 % ; Body defect = 10 %								Tail Defect= 10%							Oligoasthenoteratozoospermia+ Varicocele	N/A	N/A	N/A	No	No	No	Yes	Yes	Yes	Yes
MI-PB-030-P	0	0	0	0	0	0	0	0	0	0	0	0	0	0	0	0	0	Non obstructive azoospermia, TESA showed no sperms	1.5	1	3	No	No	No	No	No	Yes	No
MI-SP-031-P	0	0	0	0	0	0	0	0	0	0	0	0	0	0	0	0	0	Azoospermia, secondary hypogonadotrophic hypogonadism	5.42	plasma testosterone >10.09	3.43	No	No	No	No	No	No	No
MI-GMS-032-P	0	0	Head defects = 0				-	0	-	0	Tail defects = 0%		-	-	0	-	-	Severe oligozoospermia	1.44	264.75	2.36	No	No	No	No	No	Yes	No
MI-NSP-033-P	0	0	Head defects = 0				-	0	-	0	Tail defects = 0%		-	-	0	-	-	Cryptozoospermia	16.28	3.38	6.67	No	No	No	No	No	No	No
MI-KSD-034-P	0	0	0	0	0	0	0	0	0	0	0	0	0	0	0	0	0	Cryptozoospermia/OAT	3.91	662.75	7.19	No	No	No	No	Yes (Chews Tobacco)	No	No
MI-SMD-035-P	N/A																	Oligozoospermia + Asthenozoospermia	5.39	N/A	2.36	No	No	No	Yes	No	No	No
MI-BKR-036-P	N/A																	Non motile spermatozoa are seen- severe oligozoospermia	1.4	3.19	2.6	No	No	No	No	No	No	No
MI-NL-037-P	0	0	0	0	0	0	0	0	0	0	0	0	0	0	0	0	0	Azoospermia	N/A	N/A	N/A	No	No	No	No	Tobacco chewing	Yes (previously had IUI but failed due to low sperm counts)	No
MI-JPZ-038-P	2	98	96	96	96	96	96	40		8						20		Severe oligoasthenoteratozoospermia	25	12.91	249.8	No	No	No	Yes	Yes	No	No
MI-PP-039-P	0	0	0	0	0	0	0	0	0	0	0	0	0	0	0	0	0	Azoospermia (?Primary hypogonadism)	4.88	-	6.12	No	No	No	No	No	No	No
MI-ARN-040-P	4	96	94	94	94	94	-	38	-	8	20	20	-	-	-	-	-	Severe oligozoospermia and teratozoospermia	5.85	326.7	8.9	No	No	No	No	No	Yes	No
MI-KSP-041-P	6	94	48	48	48	48		20	-	4	7	7	-	-	-	-	-	Teratozoospermia	5.85	326.7	8.9	No	No	No	No	No	No	No
MI-RAD-042-P	3	97	48	48	48	48	N/A	20	48	3	9	N/A	48	48	17	9	N/A	Oligoastheroteratozoospermia	-	-	-	No	No	No	No	YesTobacco chewing	No	No
MI-AKP-043-P	2	98	96	96	96	96	-	44	-	8	16	-	-	-	-	-	-	Severe Oligoastheroteratozoospermia	5.8	678	7.67	No	No	No	No	YesTobacco chewing	Yes (5 failed IUI)	-
MI-DGL-044-P	4	96	45	45	45	45	-	21	-	4	10	-	-	-	-	-	-	Oligoasthenoteratozoospermia	4.57	1.496	8.42	No	No	No	No	YesTobacco chewing	No	No
MI-BKS-045-P	0	0	0	0	0	0	0	0	0	0	0	0	0	0	0	0	0	Azoospermia	4.48	446.98	3.06	No	No	No	No	No	No	No
MI-MAS-046-P	2	98	49	49	49	49	-	20	-	4	9	9	-	-	-	-	-	Severe Oligoastheroteratozoospermia	4.85	6.59 ng/dl	6.1	No	No	No	No	Yes	No	No
MI-HG-047-P	0	0	0	0	0	0	0	0	0	0	0	0	0	0	0	0	0	Azoospermia	23	4.55	10.68	No	No	No	No	Yes (Eats gutka)	-	-
MI-MTS-048-P	3	97	48				-	18	-	4	12		-	-	-	-	-	Severe Oligoastheroteratozoospermia	13.92	377.4	19.54	No	No	No	No	YesTobacco chewing	-	-
MI-RSV-049-P	3	97	47	47	47	47	-	21	-	3	12	-	-	-	-	-	-	Asthenoteratozoospermia	4.33	5.37	4.6	No	No	No	No	No	No	No
MI-KB-050-P	0	0	0	0	0	0	0	0	0	0	0	0	0	0	0	0	0	Non obstructive azoospermia	23.6	2.6	11.3	No	No	No	Yes (Twice a month)	Yes(Tobacco chewing-4.5 times)	No	No
MI-MT-051-P	0	0	0	0	0	0	0	0	0	0	0	0	0	0	0	0	0	Azoospermia	2.83	3.2	3.73	No	No	No	No	No	No	No
MI-MNC-052-P	4	96	47	47	47	47	-	20	-	4	9	-	-	-	-	-	-	Severe Oligozoospermia	4.34	-	3.16	No	No	No	No	No	No	No
MI-KKJ-053-P	1	99	48	48	48	48	-	20	-	5	10	-	-	-	-	-	-	Severe Oligoteratozoospermia	6.21	883	8.3	No	No	No	No	No	No	No
MI-SBP-054-P	4	96	44	44	44	44	-	22	-	4	10	-	-	-	-	-	-	Severe Oligoasthenozoospermia	1.91	400.3	-	No	No	No	Yes	Yes	No	No
MI-CN-055-P	0	0	0	0	0	0	0	0	0	0	0	0	0	0	0	0	0	Non Obstructive Azoospermia	5.12	7.38 ng/ml	6.08	No	No	No (3 months in 2019)	No	No	No	No
MI-SKB-056-P	2	98	48	48	48	48	-	22	-	4	8	-	-	-	-	-	-	Severe Oligoasthenoteratozoospermia	10.64	-	10.33	No	No	No	Yes (1-2 times a week)	Yes (10-15 bidi per day)	No	No
MI-SMS-057-P	3	97	47	47	47	47	-	22	-	4	8	-	-	-	-	-	-	Severe Oligoasthenoteratozoospermia	5.62	4.4	6.53	No	No	No	No	Yes (2-3 per day)	Yes (IVF)	No
MI-MS-058-P	4	96	45	45	45	45	-	22	-	4	9	9	-	-	-	-	-	Oligoteratozoospermia	3.91	984.9	7.34	No	No	No	No	No	No	No
MI-RJL-059-P	0	0	0	0	0	0	0	0	0	0	0	0	0	0	0	0	0	Azoospermia	31.47	317.3	15	No	No	N	Yes (once every 15 days)	Yes (2 times a day)	No	No
MI-GB-060-P	0	0	0	0	0	0	0	0	0	0	0	0	0	0	0	0	0	Azoospermia	15.67	2.1 ng/ml	14.09	No	No	No	No	No	No	No
MI-CR-061-P	3	97	48	48	48	48	-	20	-	5	8	-	-	-	-	-	-	Severe Oligoasthenoteratozoospermia	8.83		7.88	No	No	No	No	No	No	No
MI-VNS-062-P	4	96	48	48	48	48	-	18	-	4	10	-	-	-	-	-	-	Severe Oligozoospermia	12.88	597	7.84	No	No	N	No	Yes(Tobacco chewing-4 times a day)	No	No
MI-MKS-063-P	2	98	49	49	49	49	-	19	-	4	10	-	-	-	-	-	-	Severe Oligoasthenoteratozoospermia	2.02	515	3.79	No	No	No	No	No	No	No
MI-RNBP-064-P	3	97	48	48	48	48	-	22	-	4	7	-	-	-	-	-	-	Oligoasthenozoospermia and hypozoospermia	9.07	62.6	4.14	No	No	No	Yes (1-2 times a month	Yes (Tobacoo 4-5 times a day)	No	No
MI-ABT.-065-P	0	0	0	0	0	0	0	0	0	0	0	0	0	0	0	0	0	Severe Oligozoospermia	18.47	336.78	13.57	No	No	No	No	No	No	No
MI-KJT-066-P	0	0	0	0	0	0	0	0	0	0	0	0	0	0	0	0	0	Azoospermia, USG Scrotum is normal. Both FSH and LH are high	7.37	653..9	10.13	No	No	No	No	No	No	No
MI-PC-067-P	0	0	0	0	0	0	0	0	0	0	0	0	0	0	0	0	0	Non obstructive azoospermia. USG scrotum is normal. C/H/O epilepsy and currently on medication	1.85	430.31	3.98	No	No	No	No	Yes	No	No
MI-SY-068-P	0	0	0	0	0	0	0	0	0	0	0	0	0	0	0	0	0	Azoospermia + USG scrotum , s/o bilateral calcification in epididymis	4.95	2.34 ng/ml	4.67	No	No	No	No	No	Yes (had carrid out IUI but report was inconclusive - failed)	No
MI-HNP-069-P	2	98	45	45	45	45	-	22	-	4	12	-	-	-	-	-	-	Severe Oligoasthenoteratozoospermia	7.33	612	13.67	No	No	No	No	Yes (Chews tobacoo)	No	No
MI-ANM-070-P	0	0	0	0	0	0	0	0	0	0	0	0	0	0	0	0	0	USG shows normal testis, i.e :Non Obstructive Azoospermia	31.3	603	-	No	No	No	No	Yes (Chews tobacoo)	No	No
MI-AR-071-P	2	98	44	44	44	44	-	22	-	4	12	-	-	-	-	-	-	Hypospermia + Oligoasthenoteratozoospermia	13.6	437 ng/dl	8.21	No	No	No	No	No	No	No
MI-PAB-072-P	3	97	45	45	45	45	-	20	-	4	12	-	-	-	-	-	-	Severe Oligoasthenoteratozoospermia	5.45	256	5.22	No	No	No	No	No	No	No
MI-VRP-073-P	3	97	45	45	45	45	-	21	-	3	12	-	-	-	-	-	-	Severe Oligoasthenoteratozoospermia	6.06	571 ng/dl	11.39	No	No	No	No	Yes (15-20 times/ day : Chews tobacoo)	No	No
MI-BSL-074-P	0	0	0	0	0	0	0	0	0	0	0	0	0	0	0	0	0	Azoospermia	5.72	328.56	12.06	No	No	No	No	No	No	No
MI-KBB-075-P	2	98	48	48	48	48	-	20	-	4	10	-	-	-	-	-	-	Severe Oligoasthenoteratozoospermia	47.36		14.06	No	No	No	Yes (1 time a day)	Yes (Tobacoo 8-10 times a day)	No	No
MI-LH-076-P	0	0	0	0	0	0	0	0	0	0	0	0	0	0	0	0	0	Azoospermia	N/A
MI-YR-077-P	N/A																	Azoospermia	21.78	3.76	6.05	No	No	No	No	No	Yes (Failed IVF twice)
MI-DR-078-P	4	96	44	44	44	44	-	23	-	7	8	8	-	-	-	-	-	Severe Oligoasthenoteratozoospermia	37.18	371.15	14.34	No	No	No	No	Yes (3-4 times/ day : Chews tobacoo)	No	No
MI-BMR-079-P	0	0	0	0	0	0	0	0	0	0	0	0	0	0	0	0	0	Azoospermia	31.13	545.1	11.65	No	No	No	Yes	Yes (Chews Tobacco)	No	No
MI-EGC-080-P	4	96	48	48	48	48	-	19	-	4	10	10	-	-	-	-	-	Severe Oligoasthenoteratozoospermia	-	-	-	No	No	No	Yes	Yes	Yes (Failed IVF twice)	No
MI-RS-081-P	0	100	-	100	-	-	-	-	-	-	-	-	-	-	-	-	-	Globozoospermia	-	-	-	No	No	No	No	No	No	No
MI-SS-082-P	-	-	-	-	-	-	-	-	-	-	-	-	-	-	-	-	-	Azoospermia	6.01	598	8	No	No	No	No	No (Chews Tobacco)	No	No
MI-VKN-083-P	3	0	0	0	0	0	0	18	0	0	0	0	0	0	0	0	0	Severe Asthenoteratozoospermia	4.04	-	-	No	No	No	Yes (OCASSINALLY)	No	No	No
MI-KKK-084-P	0	0	0	0	0	0	0	0	0	0	0	0	0	0	0	0	0	Non obstructive azoospermia	30.42	278	12.86	No	No	No	No	No	No	No
MI-NMR-085-P	0	0	0	0	0	0	0	0	0	0	0	0	0	0	0	0	0	Azoospermia+hypogonadotrophic hypogonadism	2.44	497	3.63	No	No	No	Yes	Yes (Chews Tobacco)	No	No
MI-GHV-086-P	0	0	0	0	0	0	0	0	0	0	0	0	0	0	0	0	0	Azoospermia	4.76	536	10.89	No	No	No	No	Yes (Chews Tobacco)	No	No
MI-KMM-087-P	0	0	0	0	0	0	0	0	0	0	0	0	0	0	0	0	0	Azoospermia+ USG scrotum	3.86	4.42	456	No	No	No	Yes (OCASSINALLY)	Yes (has stopped Chews Tobacco)	No	No
MI-SKV-088-P	0	0	0	0	0	0	0	0	0	0	0	0	0	0	0	0	0	Azoospermia	8.3	10.8	418	No	No	No	Yes	Yes (Chews Tobacco)	No	No
MI-SKSS-089-P	3	97	47	47	47	47	0	18	0	4	12	12	0	0	16	0	0	Severe Asthenoteratozoospermia	3.03	406.43	4.19	No	No	No	No	Yes (Chews Tobacco)	No	No
MI-KHP-090-P	0	0	0	0	0	0	0	0	0	0	0	0	0	0	0	0	0	Azoospermia	6.6	223.4	8.46	No	No	No	No	Yes (has stopped Chews Tobacco)	No	No
MI-BSP-091-P	5	95	42	42	42	42	0	24	0	8	7	7	0	0	14	0	0	Severe Oligoasthenoteratozoospermia	13.36	392.63	14.94	No	No	No	No	No	No	No
MI-SGR-092-P	0	0	0	0	0	0	0	0	0	0	0	0	0	0	0	0	0	Azoospermia+hypogonadotrophic hypogonadism	-	398	5.1	No	No	No	No	No	No	No
MI-JVC-093-P	2	98	48	48	48	48	-	20	-	4	10	10	10	-	16	0	0	Tetratozoospermia	45.13		31.21	No	No	No	Yes	Yes	No	No
MI-SMB-094-P	0	0	0	0	0	0	0	0	0	0	0	0	0	0	0	0	0	Azoospermia	8.20 mIU/L	-	2.67	No	No	No	No	No	No	No
MI-THP-095-P	4	96	47				-	23	-	4	10		-	-	12	-	-	Severe Oligozoospermia	19.57 mIU/L	221.17	7.86	No	No	No	Yes	No	No	No
MI-KKC-096-P	3	97	45				-	22	-	3	12		-	-	15	-	-	Severe Oligoasthenoteratozoospermia	6.06	391.7	8.79	No	No	No	Yes	No	No	-
MI-MK-097-P	2	98	45	45	45	45	-	22	-	4	12	12	-	-	15	-	-	Asthenoteratozoospermia	6.6	488.41	4.77	No	No	No	No	Yes (has stopped Chews Tobacco)	No	No
MI-KDR-098	3	97	45	45	45	45	-	22	-	3	11	11	-	-	16	-	-	Severe Oligoasthenoteratozoospermia	3.22	224.39	4.83	No	No	No	No	No	No	No
MI-VGM-099-P	4	96	48	48	48	48	-	20	-	4	8	8	-	-	16	-	58	Severe Oligoasthenoteratozoospermia	14.91	285.1	18.21	No	No	No	NO	No	No	No
MI-SCP-100-P	3	97	48	48	48	48	-	20	-	3	0	0	-	-		-	-	Severe Oligoasthenoteratozoospermia	-	235.3ng/dL	-	No	No	-	Yes	No	No	No
MI-MNP-101	3	97	45	45	45	45	-	21	-	3	12	12	-	-	16	-	-	Severe Oligoasthenoteratozoospermia	5.75	>1.009.40	3.86	No	No	No	No	No	No	No
MI-MHH-102	0	0	0	0	0	0	.-	0	-	0	0	0	-	-	0	-	-	Azoospermia	17.98	816.4	12.39	No	No	No	No	No	No	No
MI-AGS-103	3	97	45	45	45	45	-	20	-	4	12	12	-	-	16	-	-	Severe Oligoasthenoteratozoospermia	10.24	328.00ng/dL	6.19	No	No	No	No	Yes(Offen)	No	No
MI-MPA-104	0	0	0	0	0	0	-	0	-	0	0	0	-	-	0	-	-	Azoospermia	9.02	381.5	4.87	No	No	No	No	No	No	No
MI-SGP-105	0	0	0	0	0	0	-	0	-	0	0	0	-	-	0	-	-	Azoospermia	4.74mIU/ML	5.874ng/ml	6.75mIU/mL	No	No	No	No	No	No	No
MI-DBP-106	0	0	0	0	0	0	-	0	-	0	0	0	-	-	0	-	-	Azoospermia	NA	NA	NA	No	No	No	No	Yes(Chewing tobacco)	No	No
MI-NT-107	2	98	47	47	47	47	-	21	-	3	13	13	-	-	14	-	-	Severe Oligoasthenoteratozoospermia	7.1	436.4	4.56	No	No	No	No	No	No	No
MI-PhS-108	3	97	45	45	45	45	-	22	-	3	12	12	-		15	-	-	Severe Oligoasthenoteratozoospermia	11.08	188.4	6.4	No	No	No	No	No	No	No
MI-PM-109-P	4	96	47	47	47	47	-	18	-	4	12	12	1		15	-	-	Oligoasthenoteratozoospermia	12.15	NA	8.87	No	No	No	No	Yes(Chewing tobacco)	No
MI-MSS-110-P	95	5	2	2	2	2	-	-	-	-	1	1	-	-	-	-	2-3/HPF	Oligozoospermia + history of recurrent lung infection and salty sweat	NA	1.13	NA	No	No	No	Yes	Yes	No	-
MI-ADP-111-P	3	97	47	47	47	47	-	20	-	3	12	12	12	-	15	-	-	Severe Oligoasthenoteratozoospermia	19.57	427.7	7.42	No	No	No	No	No	No	Yes
MI-MBM-112-P	0	0	0	0	0	0	0	0	0	0	0	0	0	0	0	0	0	Azoospermia				No	No	No	No	No	No	No
MI-NJ-113-P	0	0	0	0	0	0	0	0	0	0	0	0	0	0	0	0	0	Azoospermia	23.4	311.02	5.1	No	No	No	No	Yes(Chewing tobacco)	No	No
MI-MPR-114-P	3	97	45	45	45	45	-	20	-	4	12	12	12	-	16	-	-	Severe Oligoasthenoteratozoospermia	19.81	8.57	10.26	No	No	No	No	No	No	No
MI-RBP-115-P	3	97	48	48	48	48	-	21	-	4	10	10	10	-	14	-	-	Severe oligoasthenoteratozoospermia + elevated FSH and testosterone	4.37	248	4.2	No	No	No	No	Yes(Chewing tobacco)	No	No
MI-HKT-116-P	3	97	45	45	45	45	-	22	-	3	12	12	-	-	15	-	-	Severe Oligoasthenoteratozoospermia	2.88mIU/L	>13.5 ng/ml	5.97	No	No	No	No	No	No	No
MI-MNP-117-P	2	98	45				-	20	-	3	14		-	-	16	-	-	Severe Oligoasthenoteratozoospermia	44.5	199.9	37.11	No	No	No	No	No	Yes (successful pregnancy in IVF with first wife)	No
MI-JSK-118-P	4	96	47	47	47	47	-	20	-	4	9	9	-	-	16	-	-	Severe Oligoasthenoteratozoospermia + Hypergonadotrophic	49.5mIu/ml	0.34ng/ml	26.3mIu/ml	No	No	No	No	No	No	No
MI-KM-119	-	-	-	-	-	-	-	-	-	-	-		-	-	-	-	-	-	14.37	737.1	3.96	No	No	No	No	No	No	No
MI-RDP-120-P	3	97	48	48	48	48	-	20	-	4	10	10	-	-	15	-	-	Severe Oligoasthenoteratozoospermia	3.29	7.8	6.31	No	No	No	No	No	No	No
MI-ABK-121-P	7	89	39	39	39	39	39	26	-	7	17	17	5	-	-	-	4	Severe Oligoasthenoteratozoospermia	36.9	2.6	<0.2	No	No	No	No	No	No	No
MI-BAC-122-P	0	0	0	0	0	0	-	0	-	0	0	0	-	-	0	-	-	Azoospermia	8.63	509	4.19	No	No	No	No	Yes(Chewing tobacco)	No	No
MI-CMT-123-P	3	97	45	45	45	45	-	20	-	4	12	12	-	-	16	-	-	Severe Oligoasthenoteratozoospermia	8.76	628.5	7.46	No	No	No	No	No	to increase spearm count	No
MI-VDM-124-P	3	97	46	46	46	46	-	19	-	4	12	12	-	-	16	-	-	Severe Oligoasthenoteratozoospermia	52.91	306.3	30.49	No	No	No	No	No	No	No
MI-PKM-125-P	0	0	0	0	0	0	0	0	0	0	0	0	0	0	0	0	0	Azoospermia + Sertoli cell syndrome	10.66	410.7	11.91	No	No	Yes	No	No	No	No
MI-NDV-126-P	7	93	45	45	45	45	-	18	-	4	10	10	-	-	16	-	-	Severe oligozoospermia	10.9	914.2	3.86	No	No	No	No	Yes(STOPPED SINCE LAST 2-3 MNTHS)	No	No
MI-SJP-127-P	0	0	0	0	0	0	0	0	0	0	0	0	0	0	0	0	0	Azoospermia	8.94	577.8	11.82	No	No	No	No	Yes (Chewing tobacco)	No	No
MI-DGP-128-P	4	96	46	46	46	46	-	20	-	4	10	10	-	-	16	-	-	Oligozoospermia	5.99	616	8.73	No	No	Yes	Yes	No	No	No
MI-SJ-129-P	0	0	0	0	0	0	0	0	0	0	0	0	0	0	0	0	0	Azoospermia + c/o recurrent infection	3.22	763	8.15	Yes(medicine for high creatnine)	No	Yes	No	Yes(Chewing tobacco)	No	No
MI-RMK-130-P	3	97	45	45	45	45	-	20	-	4	12	12	-	-	16	-	-	Severe Oligoasthenoteratozoospermia	NA	NA	NA	No	No	Yes	Yes	Yes	No	No
MI-HT-131-P	0	0	0	0	0	0	0	0	0	0	0	0	0	0	0	0	0	Teratozoospermia	17.7	9	1.83	No	No	Yes	Yes	Yes	Yes(4 ivf - all failed)	No
MI-FJ-132-P	0	0	0	0	0	0	0	0	0	0	0	0	0	0	0	0	0	Severe Oligoasthenoteratozoospermia	43.35	289	19.07	Yes (for thyroid and BP)	No	No	No	No	Yes	No
MI-HBC-133-P	0	0	0	0	0	0	0	0	0	0	0	0	0	0	0	0	0	Azoospermia	28.18	387	6.77	No	No	No	No	Yes(Chewing tobacco)	No	No
MI-JG-134-P	0	0	0	0	0	0	0	0	0	0	0	0	0	0	0	0	0	Azoospermia	4.72	NA	4.37	No	No	No	No	Yes(Chewing tobacco)	No	No
MI-RRP-135-P	3	97	47	47	47	47	-	20	-	4	10	10	-	-	16	-	-	Severe Oligoasthenoteratozoospermia	8.12	318.2	9.1	No	No	No	No	No	No	No
MI-SDP-136-P	3	97	45	45	45	45	-	22	-	3	12	12	-	-	15	-	-	Severe Oligoasthenoteratozoospermia	5.78	471	6.48	No	No	No	No	Yes(Chewing tobacco)	Yes (tried iui once but failed)	Yes
MI-KVP-137-P	3	97	45	45	45	45	-	20	-	4	12	12	-	-	16	-	-	Severe Oligoasthenoteratozoospermia	17.23	>1009.40	19.4	No	No	No	No	No	No	No
MI-AAB-138-P	3	97	45	45	45	45	-	20	-	4	12	12	-	-	16	-	-	Severe Oligoasthenoteratozoospermia	5.06	316.54	7.15	No	No	No	No	No
MI-MRP-139-P	3	97	45	45	45	45	-	20	-	4	12	12	-	-	16	-	-	Severe Oligoasthenoteratozoospermia
MI-JRG-140-P	0	0	0	0	0	0	0	0	0	0	0	0	0	0	0	0	0	Severe Oligoasthenoteratozoospermia	7.5 mIU/ml	2.25 ng/ml	3.7
MI-BHP-141-P	0	0	0	0	0	0	0	0	0	0	0	0	0	0	0	0	0	Azoospermia	26.12	363.31	11.86	No	No	No	No	No	No	No
MI-KBS-142-P	0	0	0	0	0	0	0	0	0	0	0	0	0	0	0	0	0	Azoospermia	4.78	742.6	10.38	No	No	No	No	No	No	No
MI-BJA-143-P	0	0	0	0	0	0	0	0	0	0	0	0	0	0	0	0	0	Azoospermia	3.07	417	6.73	No	No	No	No	No	Yes	Yes
MI-RKP-144-P	4	96	47	47	47	47	-	19	-	4	12	12	-	-	14	-	-	Severe oligozoospermia	18.44	NA	14.44	No	No	No	Yes( once in week)	Yes(Chewing tobacco)	No	No
MI-KRB-145-P	8	92	46	46	46	46	-	18	-	4	8	8	-	-	16	-	-	Severe oligozoospermia	7.08	4.81	NA	No	No	No	No	No	No	No
MI-CS-146-P	11	87	34	34	34	34	-	28	-	10	15	15	-	-	-	-	11	Oligoasthenozoospermia + small testes	10.93	270.1	5.88	No	No	No	Yes	No	No (2 failed testicular sperm extraction)	No
MI-NRN-147-P	0	0	0	0	0	0	0	0	0	0	0	0	0	0	0	0	0	Azoospermia	9.08	690.8	11.91	No	No	No	No	Yes(Chewing tobacco)	No	No
MI-MPP-148-P	3	97	45	45	45	45	0	22	-	4	11	11	-	-	15	-	-	Severe Oligoasthenoteratozoospermia	5.11	2.57	687.2	Yes	No	No	Yes	Yes(Chewing tobacco)	No	No
MI-SVP-149-P	3	97	47	47	47	47	0	20	-	4	10	10	-	-	16	-	-	Severe Oligoasthenoteratozoospermia	4.01	3.37	263.1	No	No	No	No	No	Yes (Previous 3 cycle of IUI failed	No
MI-VVP-150-P	2	98	47	47	47	47	0	22	-	3	11	11	-	-	15	-	-	Severe Oligoasthenoteratozoospermia	3.95	3.69	4.23	No	No	No	Yes	Yes(Chewing tobacco)	Yes	No
MI-HPP-151-P	0	0	0	0	0	0	0	0	0	0	0	0	0	0	0	0	0	Azoospermia	2.07	420	1.46	No	No	No	No	No	No	No
MI-PS-152-P	8	92	46	46	46	46	-	22	-	3	11	11	-	-	14	-	-	Severe Asthenozoospermia	3.06	552.73	1.898	-	-	-	No	No	No	No
MI-DHL-153-P	0	0	0	0	0	0	0	0	0	0	0	0	0	0	0	0	0	Azoospermia	3.95	4.51	6.47	No	No	No	No	No	No	No
MI-AJM-154-P	3	97	45	45	45	45	-	22	-	3	12	12	-	-	15	-	-	Oligoasthenoteratozoospermia	NA
MI-YG-155-P	NA																	Oligospermia	NA
MI-SB-156-P	NA																	Oligospermia	NA
MI-SS-157-P	NA																	Azoospermia	NA
MI-RB-158-P	38	62	-	-	4	6	-	-	6	6	-	-	4	-	-	-	-	Oligoasthenoteratozoospermia	NA
MI-MT-159-P																		Azoospermia	NA
MI-KKS-160-P	0	0	0	0	0	0	0	0	0	0	0	0	0	0	0	0	0	Oligoasthenospermia / cryptozoospermia	3.03	257.6	1.15	No	No	No	No	No	No	No
MI-JMN-161-P	4	96	48	48	48	48	-	20	-	4	16	16	-	-	16	-	-	Severe Asthenozoospermia	27.19	112.1	9.37	No	No	No	No	No	No	No
MI-HNS-162-P	0	0	0	0	0	0	0	0	0	0	0	0	0	0	0	0	0	Azoospermia	8.6	-	2.18	No	No	No	No	Yes	No	No
MI-SRS-163-P	3	97	45	45	45	45	-	20	-	4	12	12	-	-	16	-	-	Severe Oligoasthenoteratozoospermia	2.32	495.94 ng/dL	2.8	No	No	No	No	No	No	No
MI-ADC-164-P	3	97	45	45	45	45	-	20	-	4	12	12	-	-	16	-	-	Severe Oligoasthenoteratozoospermia	1.72	294.8 ng/dL	2.3	No	No	No	No	No	No	No
MI-RUP-165-P	3	97	-	47	-	-	-	20	-	4	-	-	-	-	16	-	-	Severe Oligoasthenoteratozoospermia	8.08	553.6	6.28	No	No	No	No	No	No	No
MI-CIR-166-P	4	96	48	48	48	48	-	20	-	4	8	8	-	-	12	-	-	Severe Oligoasthenoteratozoospermia	4.2	-	-			No	No	No	No	No
MI-167-NBR-P	0	0	0	0	0	0	0	0	0	0	0	0	0	0	0	0	0	Azoospermia	2.24		3.57	No	No	No	No	No	No	No
MI-DPC-168-P	3	97	45				-	22	-	4	10		-	-	16	-	-	Asthenoteratozoospermia	4.66	307.53	6.47	No	No	No	No	No	No	No
MI-CNM-169-P	3	97	48				-	18	-	3	14		-	-	14	-	-	Severe Oligoasthenoteratozoospermia	10.82	506.2	4.63	No	No	No	No	Yes	No	No
MI-DJP-170-P	3	97	47				-	20	-	4	10		-	-	16	-	-	Severe Oligoasthenoteratozoospermia	1.34	462.4	5.82	No	No	No	No	No	No	No
MI-DJV-171-P	3	97	45				-	22	-	3	13		-	-	14	-	-	Oligoasthenoteratozoospermia	4.33	415.3	3.59	No	No	No	No	Yes	No	No
MI-PPP-172-P	2	98	45				-	20	-	3	15		-	-	15	-	-	Severe Oligoasthenoteratozoospermia	3.63	361.9	7.18	No	No	No	No	No	No	No
MI-KJG-173-P	3	97	45				-	20	-	4	12		-	-	15	-	-	Severe Oligoasthenoteratozoospermia	43.21	704.5	13.71	No	No	No	No	No	No	No
MI-DAS-174-P	3	97	45				-	22	-	4	12		-	-	14	-	-	Severe Oligoasthenoteratozoospermia	8.44	8.96	3.65ng/ml	No	No	No	No	No	No	No
MI-JVG-175-P	2	98	45	45	45	45	-	19	-	4	15	15	-	-	14	-	-	Severe Oligoasthenoteratozoospermia	18.67	256	10.64	No	No	No	No	Yes	No	No
MI-DDC-176-P	4	96	48				-	20	-	4	8		-	-	16	-	-	Severe Oligozoospermia	7.31	NA	3.06	No	No	No	No	No	No	No
MI-KKG-177-P	3	97	47				-	22	-	3	12		-	-	13	-	-	Severe Oligoasthenoteratozoospermia	NA			NA
MI-JJ-178-P																		Severe Oligoasthenozoospermia	11.08	NA	8.48	No	No	No	No	Yes	No	No
MI-NPP-179-P	3	97	45				-	20	-	4	12		-	-	16	-	-	Severe Oligoasthenoteratozoospermia	7.06	554.8	8.53	No	No	No	No	Yes	No	No
MI-DJR-180-P	2	98	44				-	22	-	4	12		-	-	16	-	-	Oligoasthenoteratozoospermia	2.93	NA	5.44	No	No	No	No	Yes	No	No
MI-NDS-181-P	0	0	0	0	0	0	0	0	0	0	0	0	0	0	0	0	0	Azoospermia	8.91	2.88	6.65	No	No	No	No	No	No	No
MI-MJB-182-P	3	97	46				-	22	-	3	12		-	-	14	-	-	Severe Oligoasthenoteratozoospermia	14.15 mIU/ml	467 ng/dl	10.93	Yes	No	No	No	No	No	No
MI-RHJ-183-P	3	97	45				-	18	-	4	14		-	-	16	-	-	Severe Oligoasthenoteratozoospermia	36.37	332.16	-	NA
MI-DVG-184-P	0	0	0	0	0	0	0	0	0	0	0	0	0	0	0	0	0	Cryptozoospermia	14.9	441.5	8.19	No	No	No	No	No	No	No
MI-VMN-185-P	0	0	0	0	0	0	0	0	0	0	0	0	0	0	0	0	0	Azoospermia	7.21mIU/ml	641.3 ng/dl	2.26	No	No	No	No	Yes	No	No
MI-SCD-186-P	0	0	0	0	0	0	0	0	0	0	0	0	0	0	0	0	0	Azoospermia	NA
MI-RDT-187-P																		Severe Oligoasthenozoospermia	3.90 mIU/ml	276.6 ng/dl	6.72	No	No	No	No	No	No	No
MI-SMK-188-P	2	98	44				-	22	-	4	12		-	-	16	-	-	Severe Oligoasthenoteratozoospermia	20.30 mIU/ml	470.9 ng/dl	8.73	No	No	No	No	No	No	No
MI-NKS-189-P	3	97	45				-	20	-	4	12		-	-	16	-	-	Severe Oligoasthenoteratozoospermia	17.14 mIU/ml	NA	9.26	No	No	No	No	Yes	Yes	No
MI-BRB-190-P	0	0	0	0	0	0	0	0	0	0	0	0	0	0	0	0	0	Azoospermia	8.02 mIU/ml	302.1 ng/dl	8.93	No	No	No	No	No	Yes	No
MI-RNS-191-P	2	98	45				-	17	-	5	15		-	-	12	-	-	Severe Oligoasthenoteratozoospermia	NA
MI-PC-192-P																		Severe Oligoasthenoteratozoospermia	7.25 mIU/ml	329.3 ng/dl	6.58	No	No	No	Yes	No	No	No
MI-JLS-193-P	2	98	45				-	22	-	3	14		-	-	14	-	-	Asthenoteratozoospermia	10.14 mIU/ml	378.24 ng/dl	7.77	No	No	No	No	No	Yes	No
MI-DKP-194-P	3	97	45				-	20	-	4	12		-	-	16	-	-	Severe Oligoasthenoteratozoospermia	6.33 mIU/ml	674	3.18	No	No	No	No	No	No	No
MI-NMG-195-P	0	0	0	0	0	0	0	0	0	0	0	0	0	0	0	0	0	Azoospermia	3.16 mIU/ml	338.7 ng/dl	7.37	No	No	No	No	No	No	No
MI-JRR-196-P	4	96	46				-	20	-	4	10		-	-	16	-	-	Severe Oligozoospermia	3.29 mIU/ml	7.26	434	No	No	No	No	No	No	No
MI-FAM-197-P	3	97	45	45	45	45	-	20	-	4	12	12	-	-	16	-	-	Severe Oligoasthenoteratozoospermia	25.51 mIU/ml	254.69 ng/dl	NA	NA
MI-SGG-198-P	0	0	0	0	0	0	0	0	0	0	0	0	0	0	0	0	0	Azoospermia	NA			NA
MI-RRP-199-P	0	0	0	0	0	0	0	0	0	0	0	0	0	0	0	0	0	Azoospermia	9.24 mIU/ml	278.48 ng/dl	10.64	No	No	No	No	No	No	No
MI-RAK-200-P	3	97	47				-	20	-	4	10		-	-	16	-	-	Severe Oligoasthenoteratozoospermia	19.39 mIU/ml	289.6 ng/dl	9.33	No	No	No	No	No	No	No
MI-GBD-201-P	2	98	45				-	22	-	4	14		-	-	13	-	-	Severe Oligoasthenoteratozoospermia	17.36mIU/mL	459.63	10.21 mIU/ml	No	No	No	No	No	No	No
MI-DDS-202-P	4	96	46	46	46	46	-	20	-	4	10	10	-	-	16	-	-	Severe Oligozoospermia	5.99 mIU/ml	428.6 ng/dl	3.18	No	No	No	Yes	Yes	Yes	No
MI-AKN-203-P	3	97	47				-	22	-	3	11		-	-	14	-	-	Severe Oligoasthenoteratozoospermia	19.63 mIU/ml	330.4 ng/dl	7.65	Yes	No	No	No	No	Yes	No
MI-AMP-204-P	3	97	45				-	18	-	4	12		-	-	14	-	-	Severe Oligoasthenoteratozoospermia	1.36 mIU/ml	211.62 ng/dl	2.91	No	No	No	No	No	No	No
MI-BKP-205-P	4	96	46				-	20	-	4	10		-	-	16	-	-	Severe Oligozoospermia	6.30 mIU/ml	-	4.92	No	No	No	Yes	No	No	No
MI-DSD-206-P	3	97	45				-	20	-	3	14		-	-	15	-	-	Severe Oligoasthenoteratozoospermia	2.41mIU/ml	298.85 ng/dl	-
MI-DVH-207-P	0	0	0	0	0	0	0	0	0	0	0	0	0	0	0	0	0	Non Obstructive Azoospermia	4.84 mIU/ml	174.8 ng/dl	2.78	No	No	No	No	No	No	No
MI-KKB-208-P	4	96	46				-	20	-	4	10		-	-	16	-	-	Severe oligozoospermia	10.63 mIU/ml	349.9 ng/dl	7.67	No	No	No	No	No	No	No
MI-RAP-209-P	0	0	0	0	0	0	0	0	0	0	0	0	0	0	0	0	0	Azoospermia	13.74 mIU/ml	370.6 ng/dl	4.81	No	No	No	No	No	Yes	No
MI-BJM-210-P	3	97	45				-	20	-	4	12		-	-	16	-	-	Severe Oligoasthenoteratozoospermia	5.16 mIU/ml	300 ng/dl	7.07	No	No	No	Yes	No	Yes	No
MI-RMM-211-P	2	98	47				-	22	-	3	12		-	-	14	-	-	Severe Oligoasthenoteratozoospermia	10.56 mIU/ml	3.58 ng/ml	8.51	No	No	No	No	Yes	No	No
MI-VDS-212-P	3	97	45				-	20	-	4	12		-	-	16	-	-	Severe Oligoasthenoteratozoospermia	11.01 mIU/ml	224.3 ng/dl	8.4	No	No	No	No	No	No	Yes
MI-TSG-213-P	0	0	0	0	0	0	0	0	0	0	0	0	0	0	0	0	0	Azoospermia	7.65 mIU/ml	5.73 ng/ml	5.79	No	No	No	No	No	Yes	No
MI-NBP-214-P	5	95	45				-	20	-	4	10		-	-	16	-	-	Severe Oligozoospermia	9.49 mIU/ml	490 ng/dl	8.63	No	No	No	No	Yes	No	No
MI-VBM-215-P	3	97	45				-	20	-	4	12		-	-	16	-	-	Severe Oligoasthenoteratozoospermia	8.27 mIU/ml	397.4 ng/dl	4.34	No	No	No	No	No	Yes	No
MI-MR-216-P	0	0	0	0	0	0	0	0	0	0	0	0	0	0	0	0	0	Azoospermia	19.94 mIU/ml	-	11.11	No	No	No	No	Yes	Yes	No
MI-CBS-217-P	0	0	0	0	0	0	0	0	0	0	0	0	0	0	0	0	0	Non Obstructive Azoospermia	11.06 mIU/ml	299.2 ng/dl	8.48	No	No	No	No	No	No	No
MI-BRR-218-P	4	96	46				-	20	-	4	10		-	-	16	-	-	Severe Oligozoospermia	9.87 mIU/ml	602 ng/ml	13.12	No	No	No	No	Yes	Yes	No
MI-DGV-219-P	5	95	45				-	20	-	4	10		-	-	16	-	-	Severe Oligozoospermia	5.95 mIU/ml	518.04 ng/dl	5.09	No	No	No	No	Yes	No	No
MI-SDP-220-P	3	97	45				-	20	-	4	12		-	-	16	-	-	Severe Oligoasthenoteratozoospermia	7.27 mIU/ml	224.1 ng/dl	6.55	No	No	No	No	No	No	No
MI-HRM-221-P	3	97	45				-	20	-	4	12		-	-	16	-	-	Severe Oligoasthenoteratozoospermia	5.41 mIU/ml	274.7 ng/ml	6.97	No	No	No	No	No	No	No
MI-AKM-222-P	5	95	45				-	20	-	4	10		-	-	16	-	-	Oligozoospermia	7.0 mIU/ml	542.3 ng/ml	1.66	No	No	No	No	Yes	No	No
MI-JKP-223-P	5	95	43				-	21	-	3	14		-	-	14	-	-	Oligozoospermia	20.42 mIU/ml	314.2 ng/nl	7.75	No	No	No	No	Yes	Yes	No
MI-DHP-224-P	3	97	45				-	20	-	4	12		-	-	16	-	-	Severe Oligoasthenoteratozoospermia	6.51mIU/ml	343.3 ng/mL	4.79	No	No	No	No	No	No	No
MI-HJP-225-P	0	0	0	0	0	0	0	0	0	0	0	0	0	0	0	0	0	Azoospermia	15.80 mIU/ml	284.4 ng/ml	9.07	No	No	No	No	No	Yes	No
MI-RMS-226-P	3	97	45				-	20	-	4	12		-	-	16	-	-	Severe Oligoasthenoteratozoospermia	2.96 mIU/ml	546.9 ng/mL	6.69	No	No	No	No	No	No	No
MI-ARH-227-P	0	0	0	0	0	0	0	0	0	0	0	0	0	0	0	0	0	Azoospermia	5.51 mIU/ml	4.78 ng/dL	7.26	No	No	No	No	No	No	No
MI-GRS-228-P	NA																	Anejaculation	3.03 mIU/ml	859.7 ng/ml	6.65	No	No	No	No	No	No	No
MI-MDC-229-P	3	97	45				-	20	-	3	14		-	-	15	-	-	Severe Oligoasthenoteratozoospermia	8.23 mIU/ml	233.2 ng/dl	6.78	No	No	No	No	No	No	No
MI-JSD-230-P	2	98	48				-	20	-	4	10		-	-	16	-	-	Severe Oligoasthenoteratozoospermia	14.44 mIU/ml	179.5 ng/dl	6.83	No	No	No	No	No	No	No
MI-YGK-231-P	2	98	46				-	22	-	4	10		-	-	16	-	-	Severe Oligoasthenoteratozoospermia	4.78 mIU/ml	358ng/dL	5.53mIU/ml	No	No	No	No	No	Yes	No
MI-DKS-232-P	2	98	45				-	22	-	3	14		-	-	14	-	-	Severe Asthenozoospermia	5.78 mIU/ml	727.8 ng/dL	3.82	No	No	No	No	No	Yes	No
MI-MTA-233-P	2	98	45				-	22	-	4	12		-	-	15	-	-	Severe Oligoasthenoteratozoospermia	3.53 mIU/ml	357.28 ng/dl	4.28	No	No	No	No	No	Yes	No
MI-HDP-234-P	3	97	45				-	20	-	4	12		-	-	16	-	-	Asthenoteratozoospermia	130.5 mIU/ml	503.8 ng/dL	42.1	No	No	No	No	Yes	No	No
MI-ARD-235-P	0	0	0	0	0	0	0	0	0	0	0	0	0	0	0	0	0	Azoospermia	36.31 mIU/ml	288.5 ng/dL	9.88	No	No	No	No	No	Yes	No
MI-BHL-236-P	0	0	0	0	0	0	0	0	0	0	0	0	0	0	0	0	0	Azoospermia	22.42 mIU/ml	652 ng/dL	11.83	No	No	No	No	No	No	No
MI-KJ-237-P	0	0	0	0	0	0	0	0	0	0	0	0	0	0	0	0	0	Azoospermia/ Oligoasthenoteratozoospermia	17.57 mIU/ml	548.12 ng/dL	6.56	No	No	No	No	No	Yes	No
MI-KKK-238-P	2	98	45				-	22	-	4	12		-	-	15	-	-	Oligoasthenoteratozoospermia	7.36 mIU/ml	533.1 ng/dl	11.45	No	No	No	No	No	No	No
MI-KD-239-P	3	97	47				-	22	-	3	12		-	-	13	-	-	Severe Oligoasthenoteratozoospermia	3.81 mIU/ml	797.9 ng/dL	4.95	No	No	No	No	Yes	No	No
MI-VMS-240-P	0	0	0	0	0	0	0	0	0	0	0	0	0	0	0	0	0	Azoospermia	24.70 mIU/ml	830.8 ng/dL	9.01	No	No	No	Yes	No	Yes	No
MI-JLS-241-P	2	98	46				-	22	-	3	12		-	-	15	-	-	Oligoasthenoteratozoospermia	3.65 mIU/ml	691.8 ng/dL	5.05	No	No	No	No	Yes	No	No
MI-HPS-242-P	2	98	46				-	20	-	4	12		-	-	16	-	-	Severe Oligoasthenoteratozoospermia	3.33 mIU/ml	240.63 ng/dl	4.2	No	No	No	No	Yes	No	No
MI-AKP-243-P	3	97	45				-	20	-	4	10		-	-	18	-	-	Severe Oligoasthenoteratozoospermia	-	-	-	No	No	Yes	No	No	No	No
MI-LC-244-P	0	100	54				-	35	-	-	11		-	-	-	-	-	Teratozoospermia	4.44 mIU/ml	13.93 nmol/L	3.76	No	No	No	No	No	No	No
MI-AMP-245-P	3	97	45				-	20	-	5	11		-	-	16	-	-	Severe Oligoasthenoteratozoospermia	2.02 mIU/ml	8012 nmol/L	6.92	No	No	No	No	No	No	No
MI-SAK-246-P	3	97	45				-	20	-	4	12		-	-	16	-	-	Severe Oligoasthenoteratozoospermia	2.13 mIU/ml	703.35 ng/dl	-	NA	NA	NA	NA	NA	NA	NA
MI-VDH-247-P	0	0	0	0	0	0	0	0	0	0	0	0	0	0	0	0	0	Azoospermia	20.16 mIU/ml	11.05 nmol/L	12.14	No	No	No	No	No	No	No
MI-MMB-248-P	3	97	45				-	20	-	4	12		-	-	16	-	-	Severe Oligoasthenoteratozoospermia	6.21 mIU/ml	20.09	8.46	No	No	No	No	No	No	No
MI-KKS-249-P	0	0	0	0	0	0	0	0	0	0	0	0	0	0	0	0	0	Azoospermia	18.65 mIU/ml	37.03	31.44	No	No	No	No	No	No	No
MI-CGM-250-P	0	0	0	0	0	0	0	0	0	0	0	0	0	0	0	0	0	Azoospermia	13.2mIU/ml	1.70ng/ml	5.8mIU/ml	No	No	No	No	No	No	No
MI-JV-251-P	0	0	0	0	0	0	0	0	0	0	0	0	0	0	0	0	0	Azoospermia	4.35 mIU/ml	22.79 nmol/L	3.73	No	No	No	No	Yes	No	Yes
MI-CNC-252-P	3	97	45				-	20	-	4	12		-	-	16	-	-	Severe Oligoasthenoteratozoospermia	8.86mIU/ml	1.78ng/ml	5.94 mIU/ml	No	No	No	Yes	Yes	No	No
MI-NP-253-P	0	0	0	0	0	0	0	0	0	0	0	0	0	0	0	0	0	Non Obstructive Azoospermia	NA	NA	NA	NA	NA	NA	NA	NA	NA	NA
MI-AU-254-P	0	0	0	0	0	0	0	0	0	0	0	0	0	0	0	0	0	Azoospermia ( CBAVD)
