# Supplementary material for: Genetic diversity of infertile males in India
Source: Research Square preprint supplement (doi:10.21203/rs.3.rs-7849365/v1), 2025-10-31
Supplement: Supplementary file 6 [file 6d042ba60345eb9640024483.docx]

**Supplementary File 2** : Pedigree of 48 patient parent singleton/duos/trios. P= Proband, F= Father, M=Mother. Shaded square boxes with arrow are the probands. Remaining shaded square boxes are males with infertility.

| MI-004  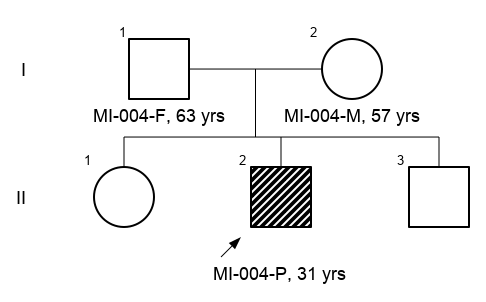 | MI-022  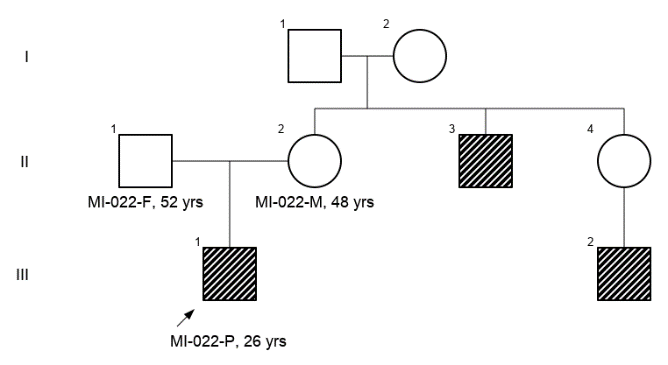 |
| --- | --- |
| MI-029  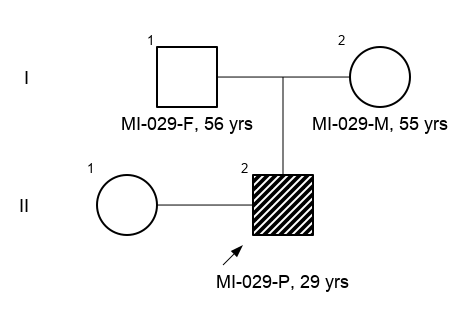 | MI-030  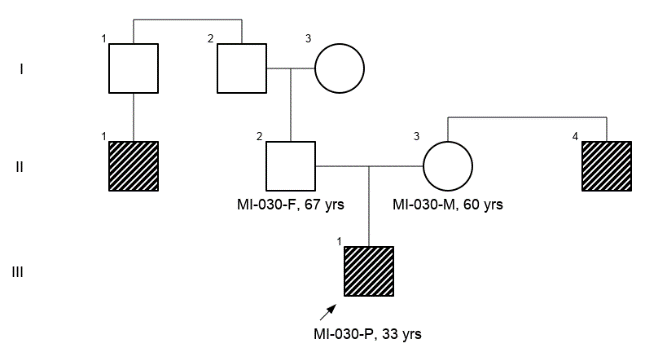 |
| MI-032  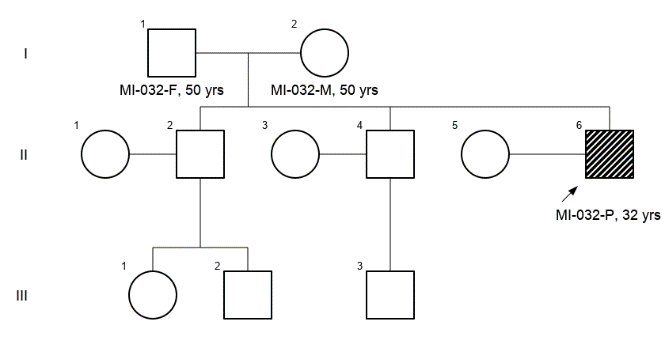 | MI-033  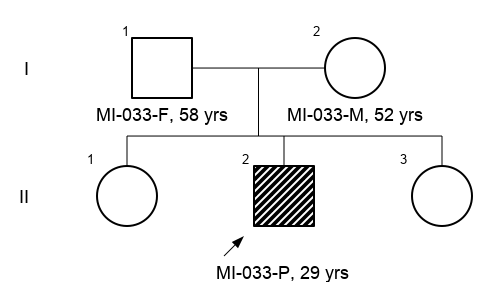 |
| MI-041  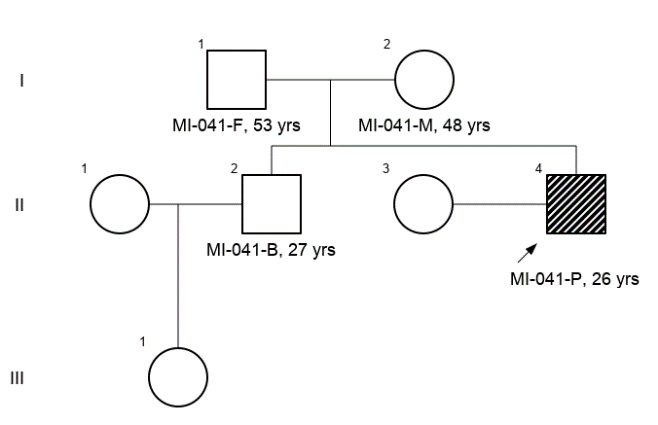 | MI-047  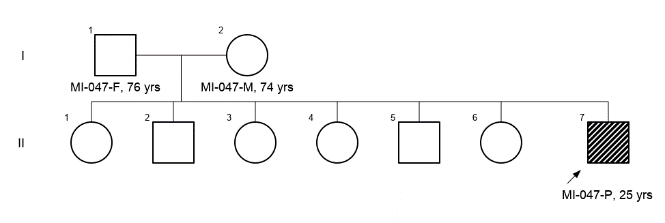 |

| MI-053  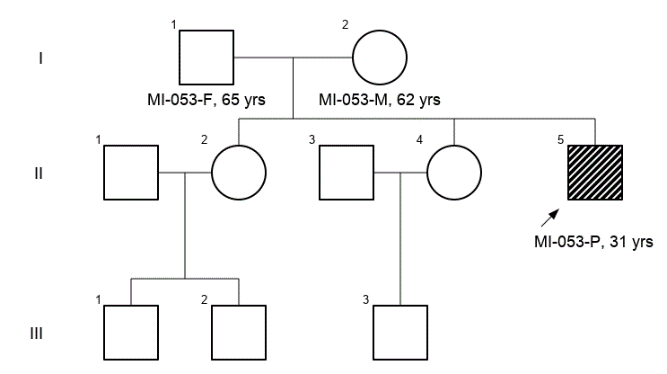 | MI-086  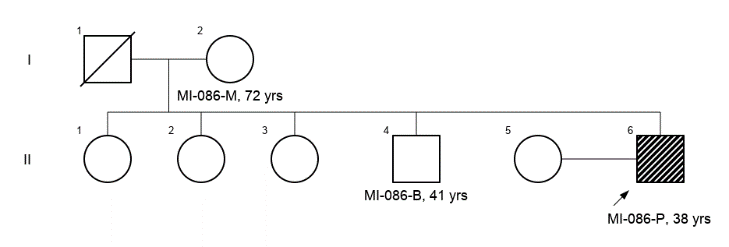 |
| --- | --- |
| MI-089  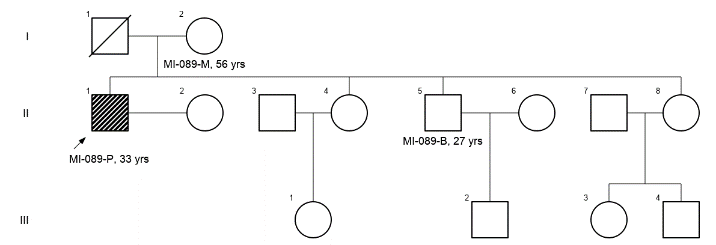 | MI-091  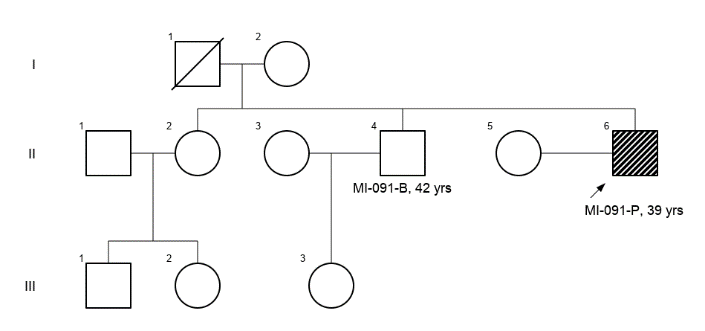 |
| MI-099  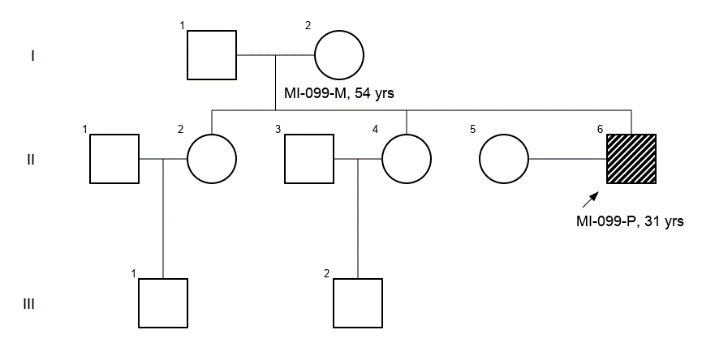 | MI-100  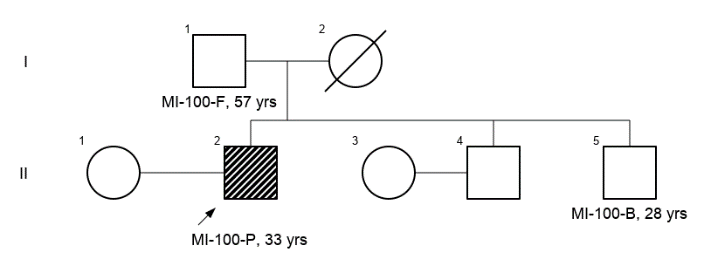 |
| MI-105  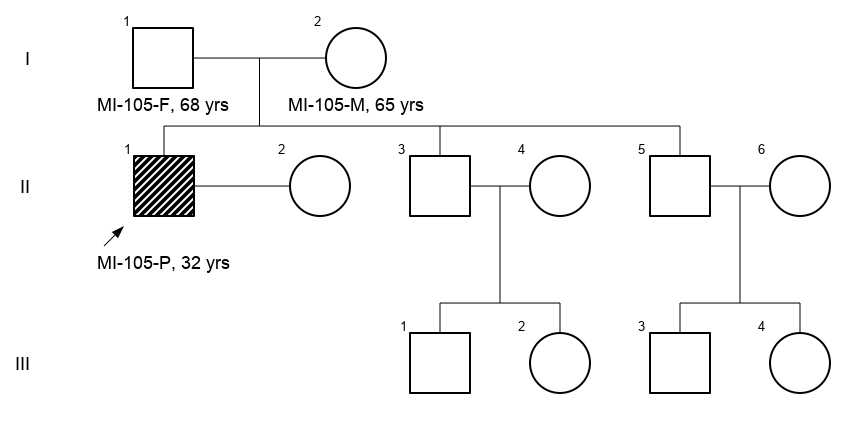 | MI-109  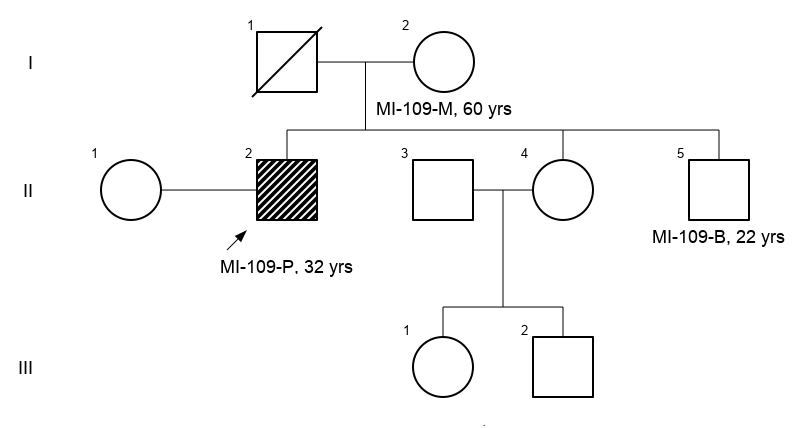 |
| MI-110  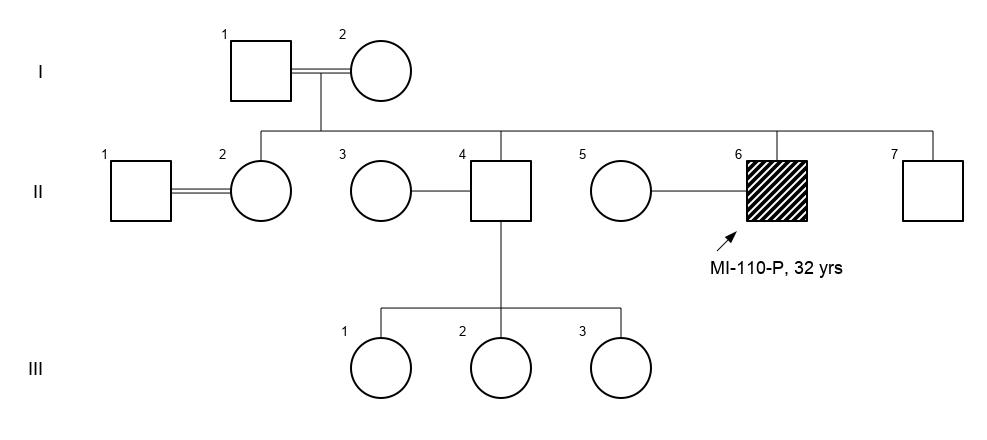 | MI-123  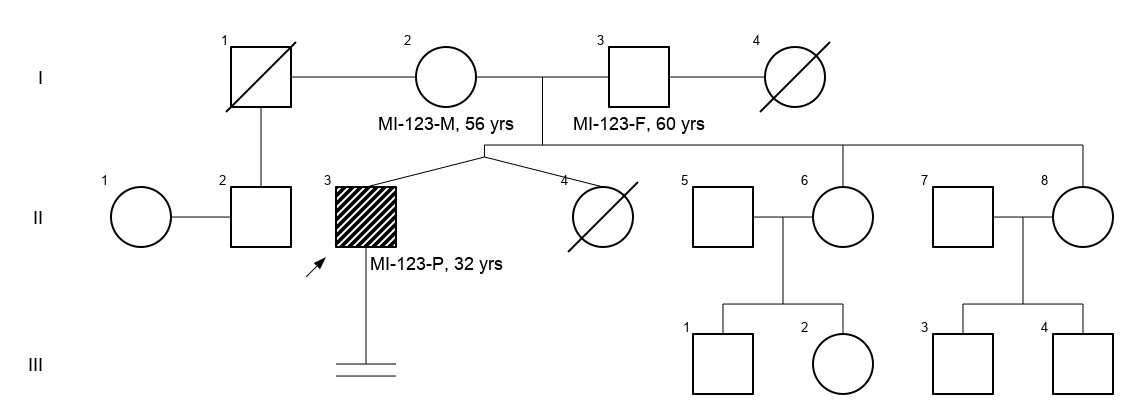 |
| MI-127  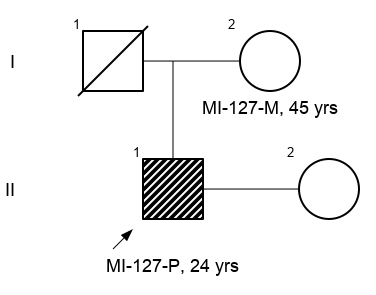 | MI-129  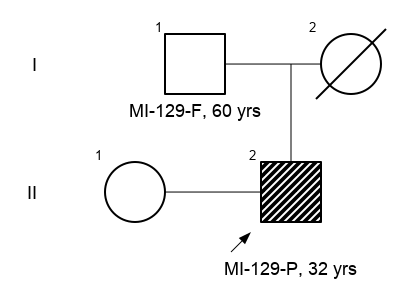 |
| MI-132  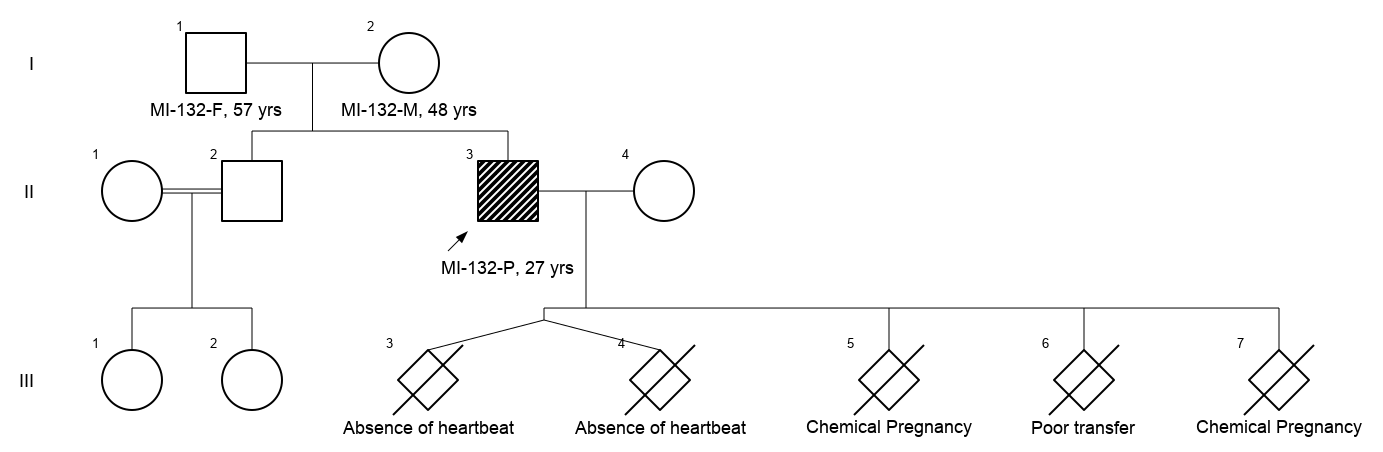 | MI-134  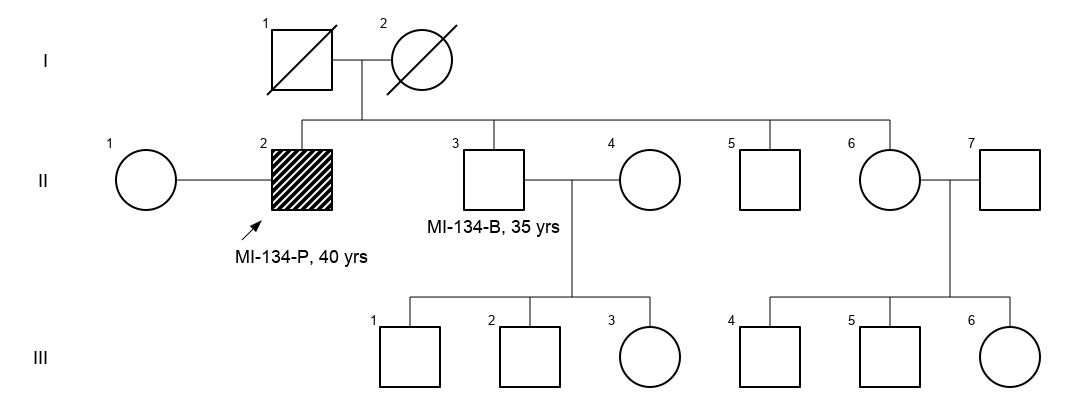 |
| MI-136  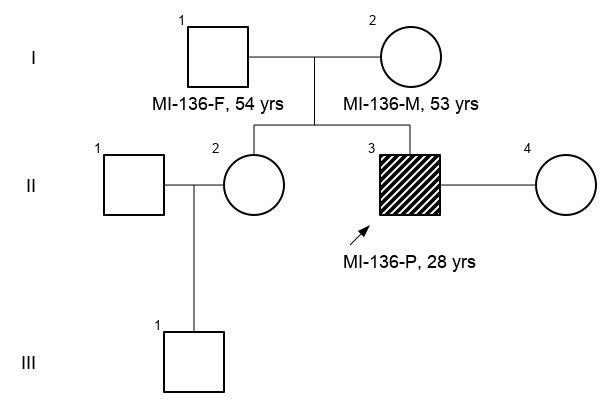 | MI-138  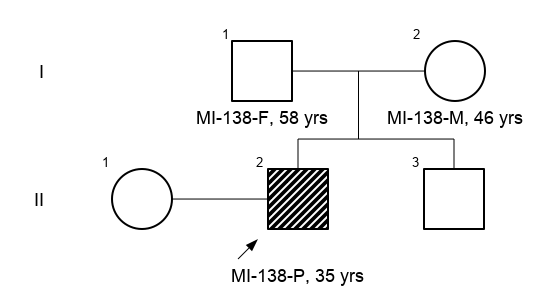 |
| MI-139  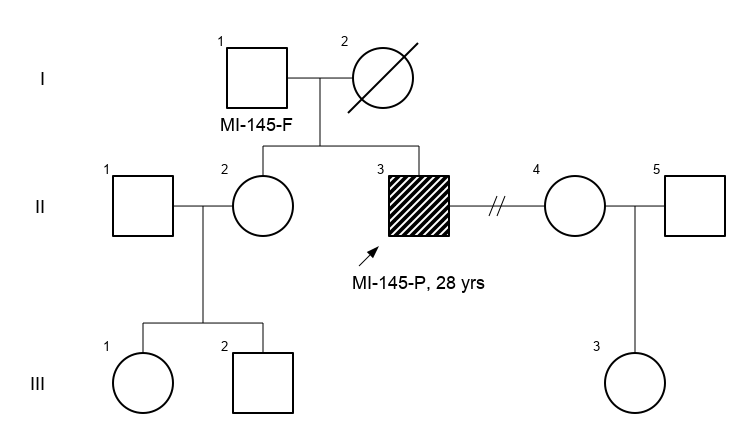 | MI-145  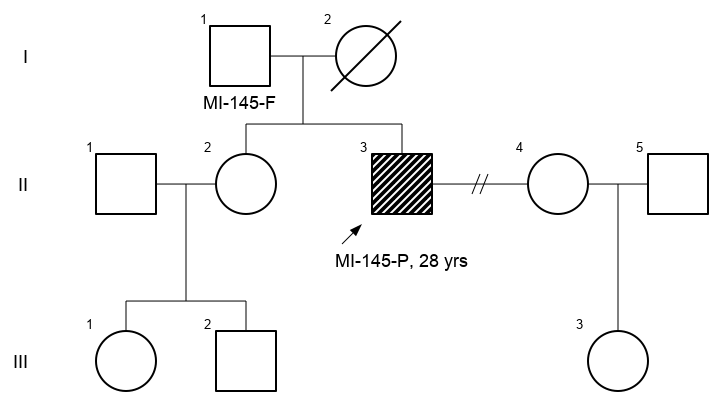 |
| MI-151  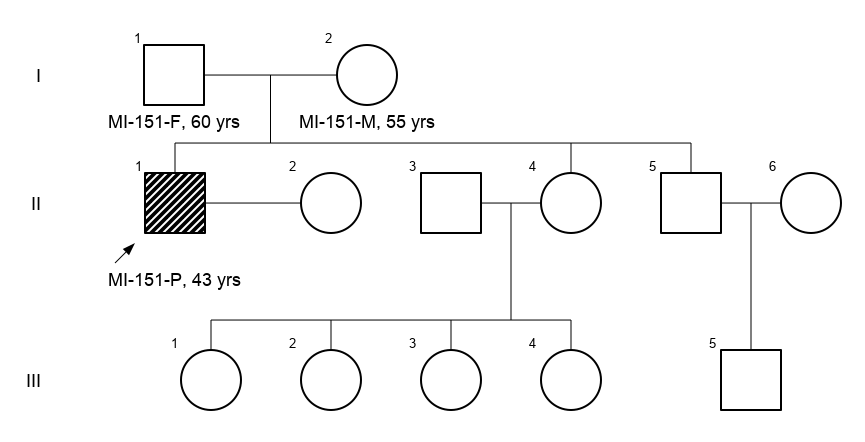 | MI-155  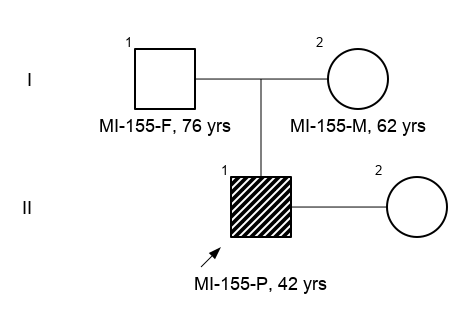 |
| MI-156  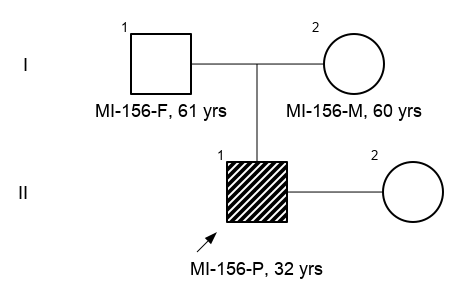 | MI-157  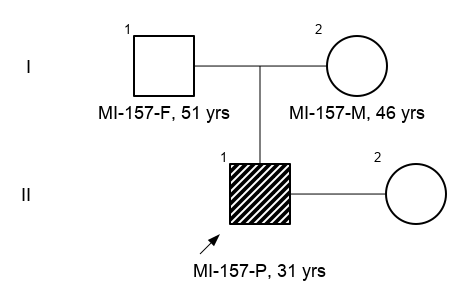 |
| MI-158  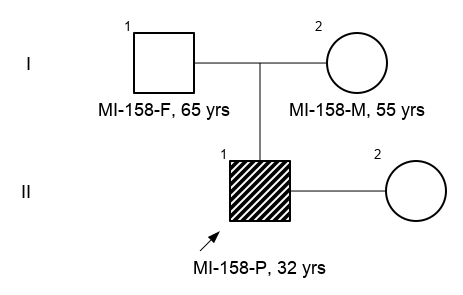 | MI-159  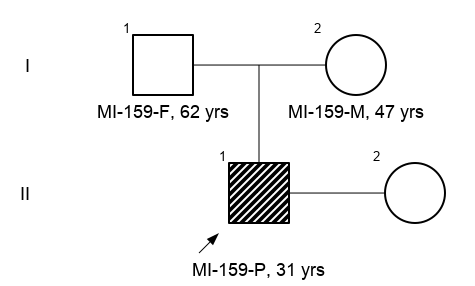 |
| MI-162  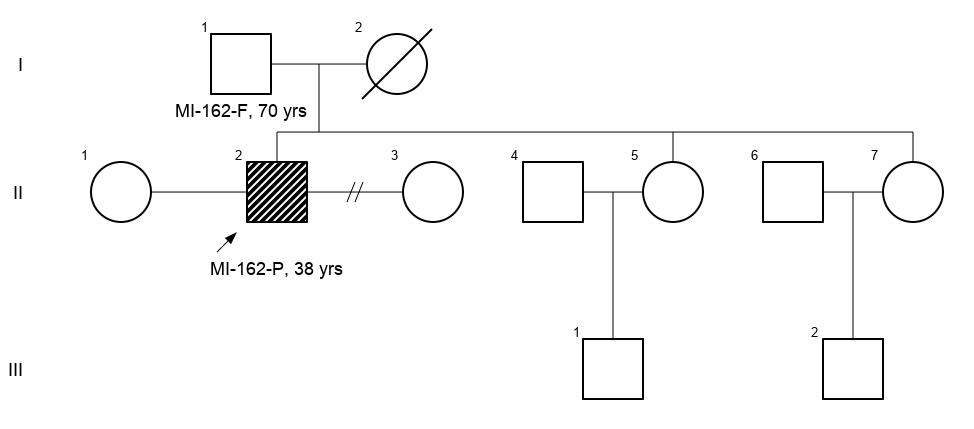 | MI-164  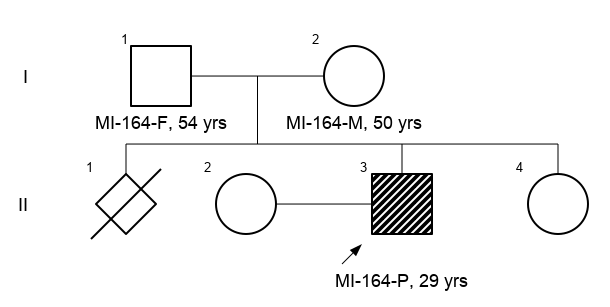 |
| MI-172  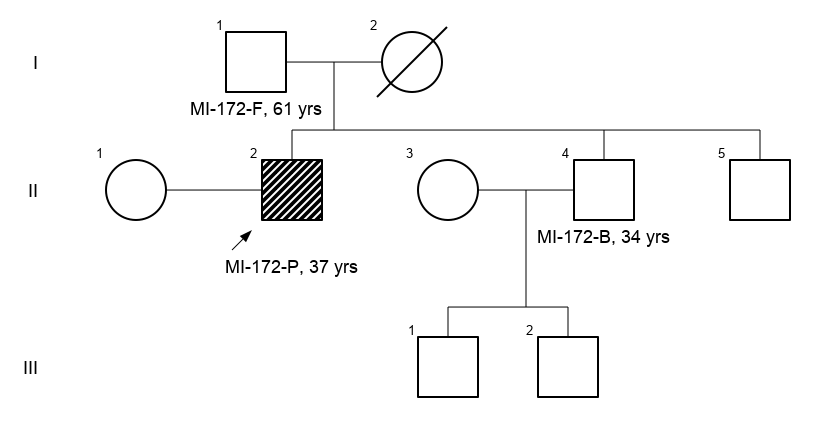 | MI-180  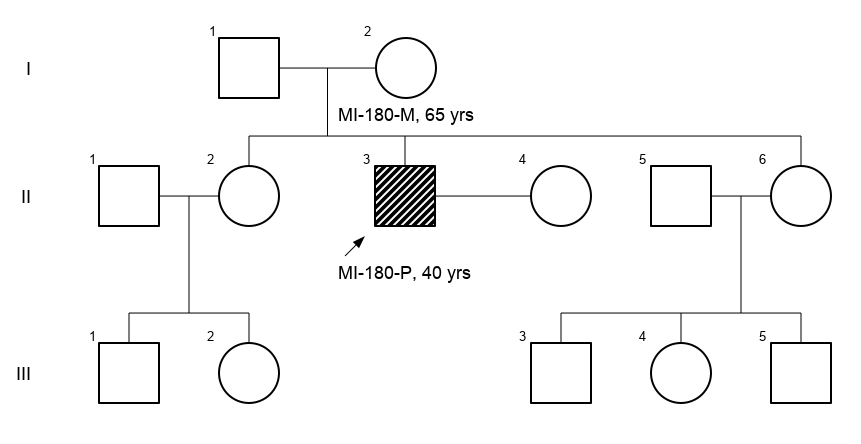 |
| MI-190  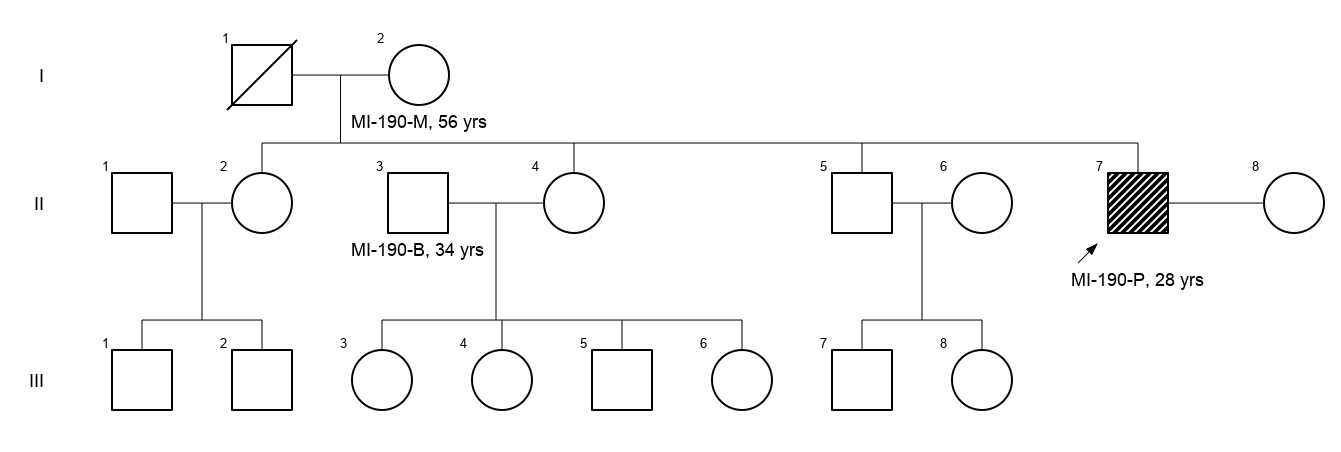 | MI-194  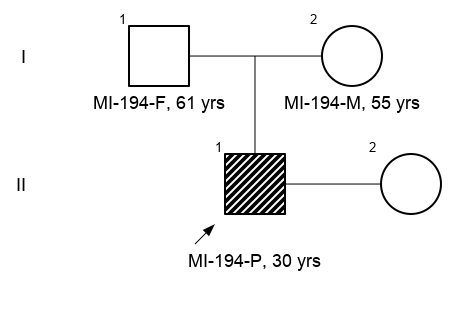 |
| MI-196  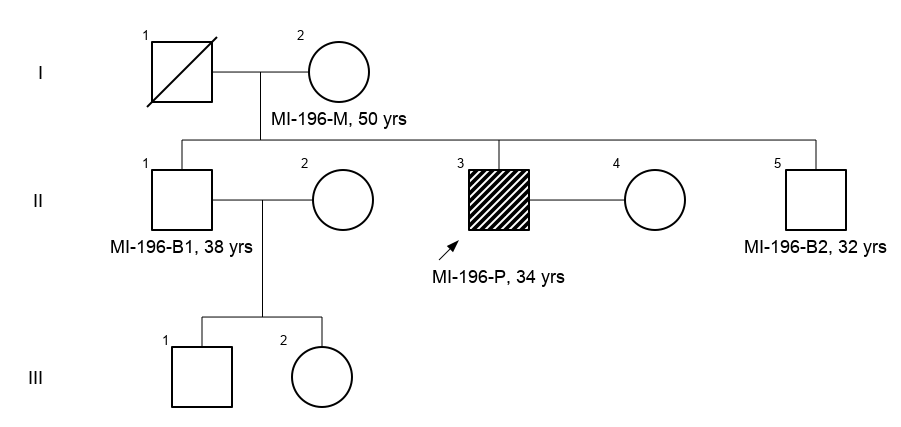 | MI-207  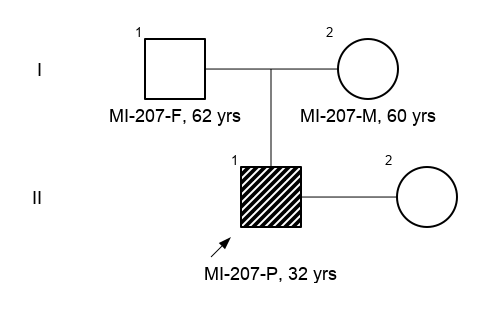 |
| MI-213  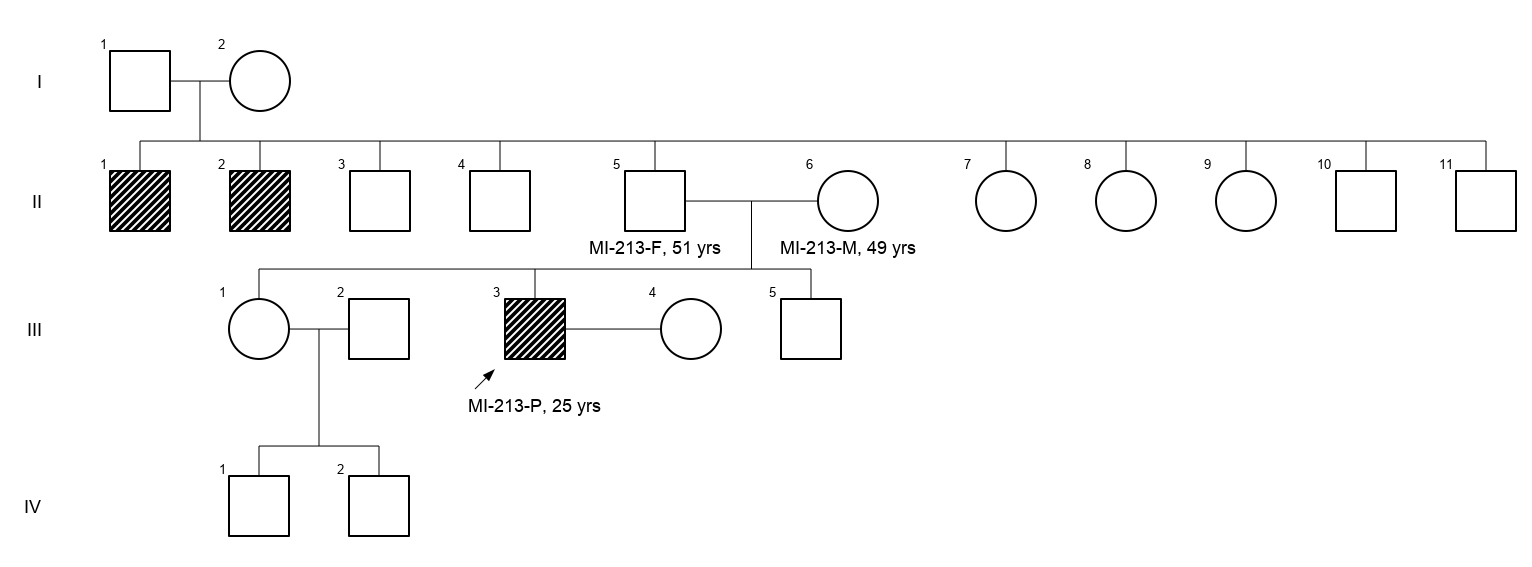 | MI-242  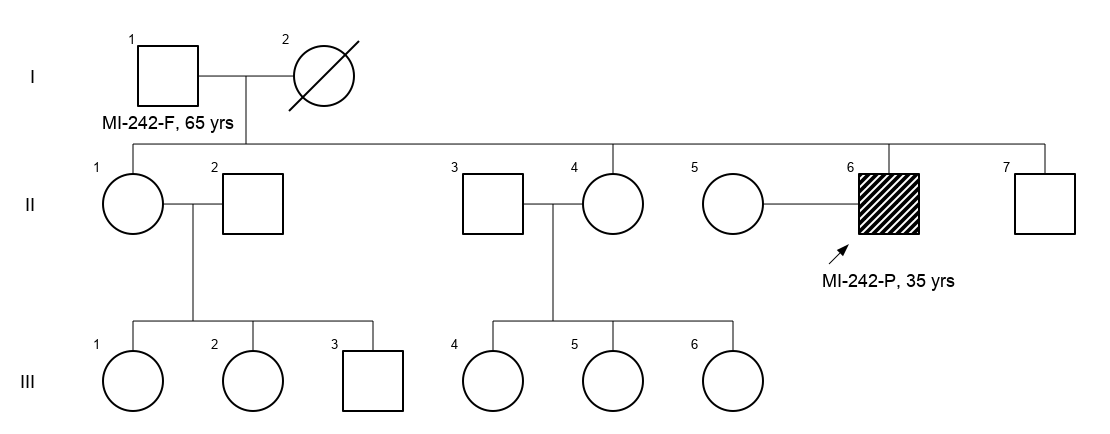 |
| MI-244  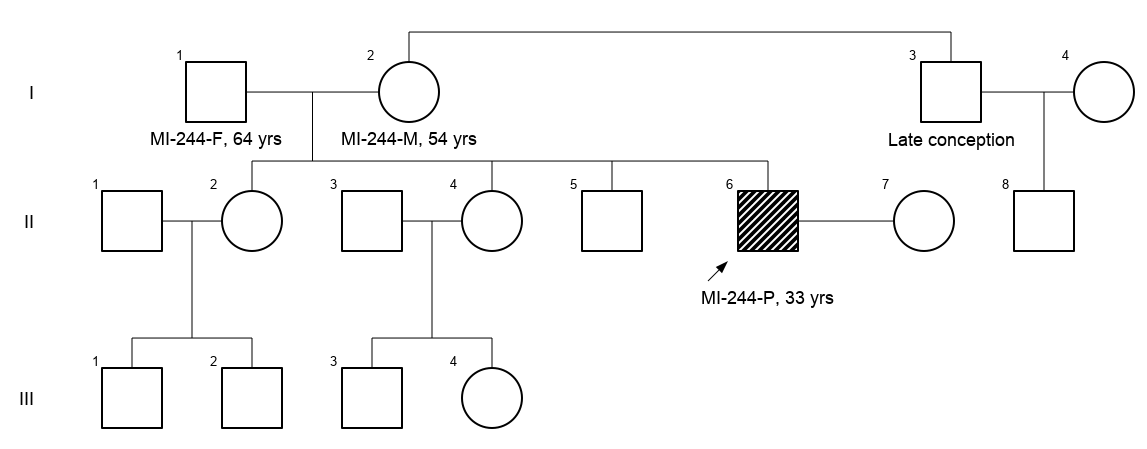 | MI-246  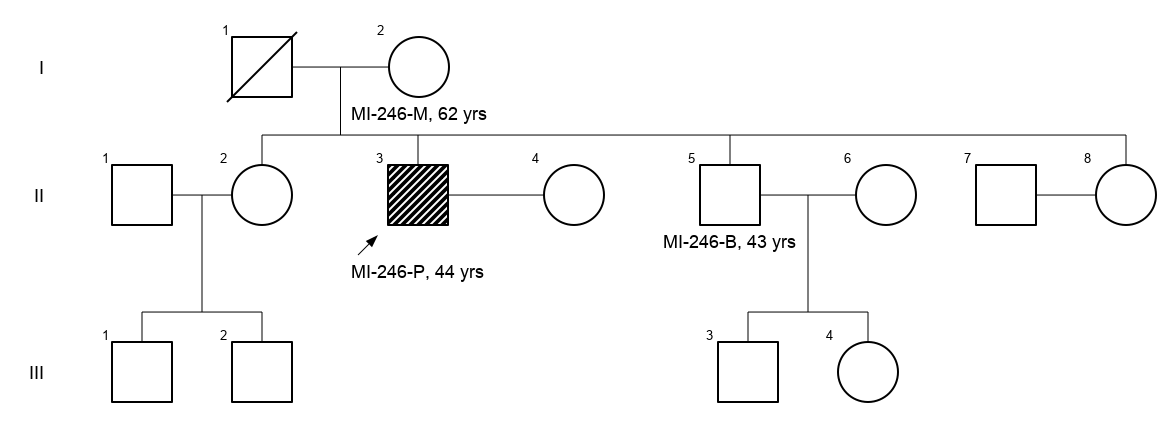 |
| MI-247  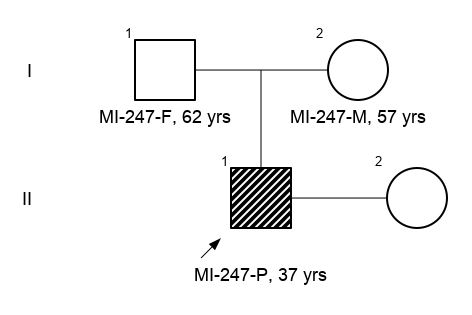 | MI-249  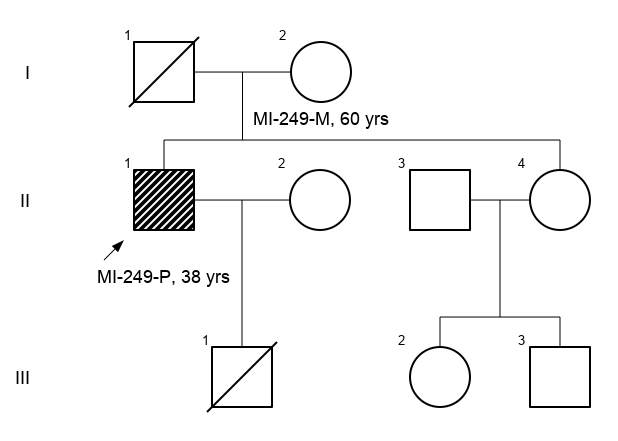 |
| MI-251  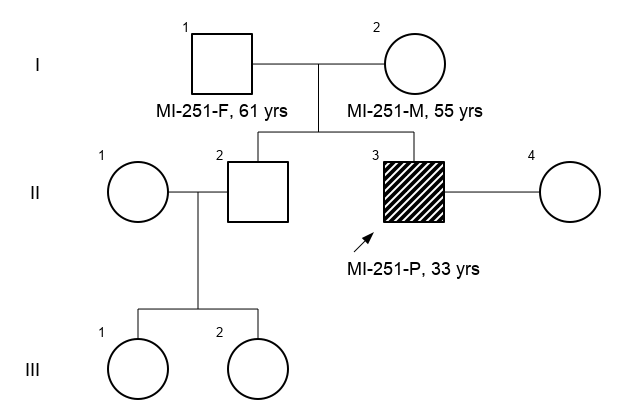 | MI-252  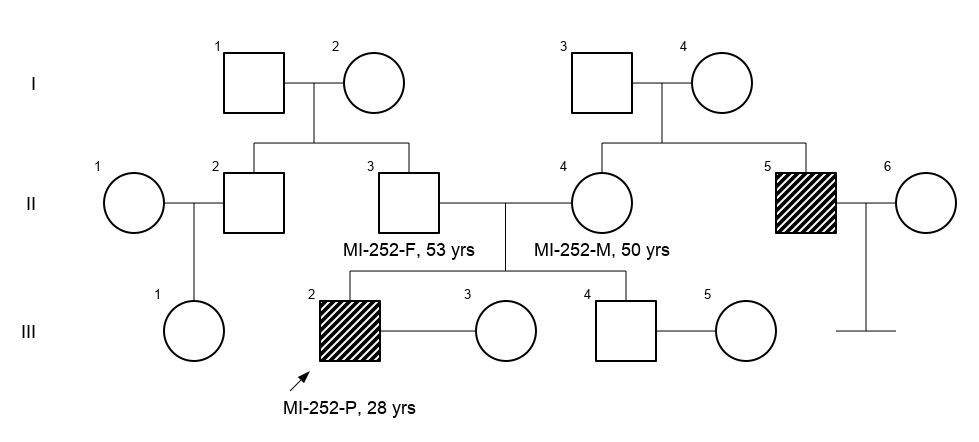 |
