# Supplementary material for: Genetic diversity of infertile males in India
Source: Research Square preprint supplement (doi:10.21203/rs.3.rs-7849365/v1), 2025-10-31
Supplement: Supplementary file 7 [file 80205b39e342a57ef944b85f.docx]

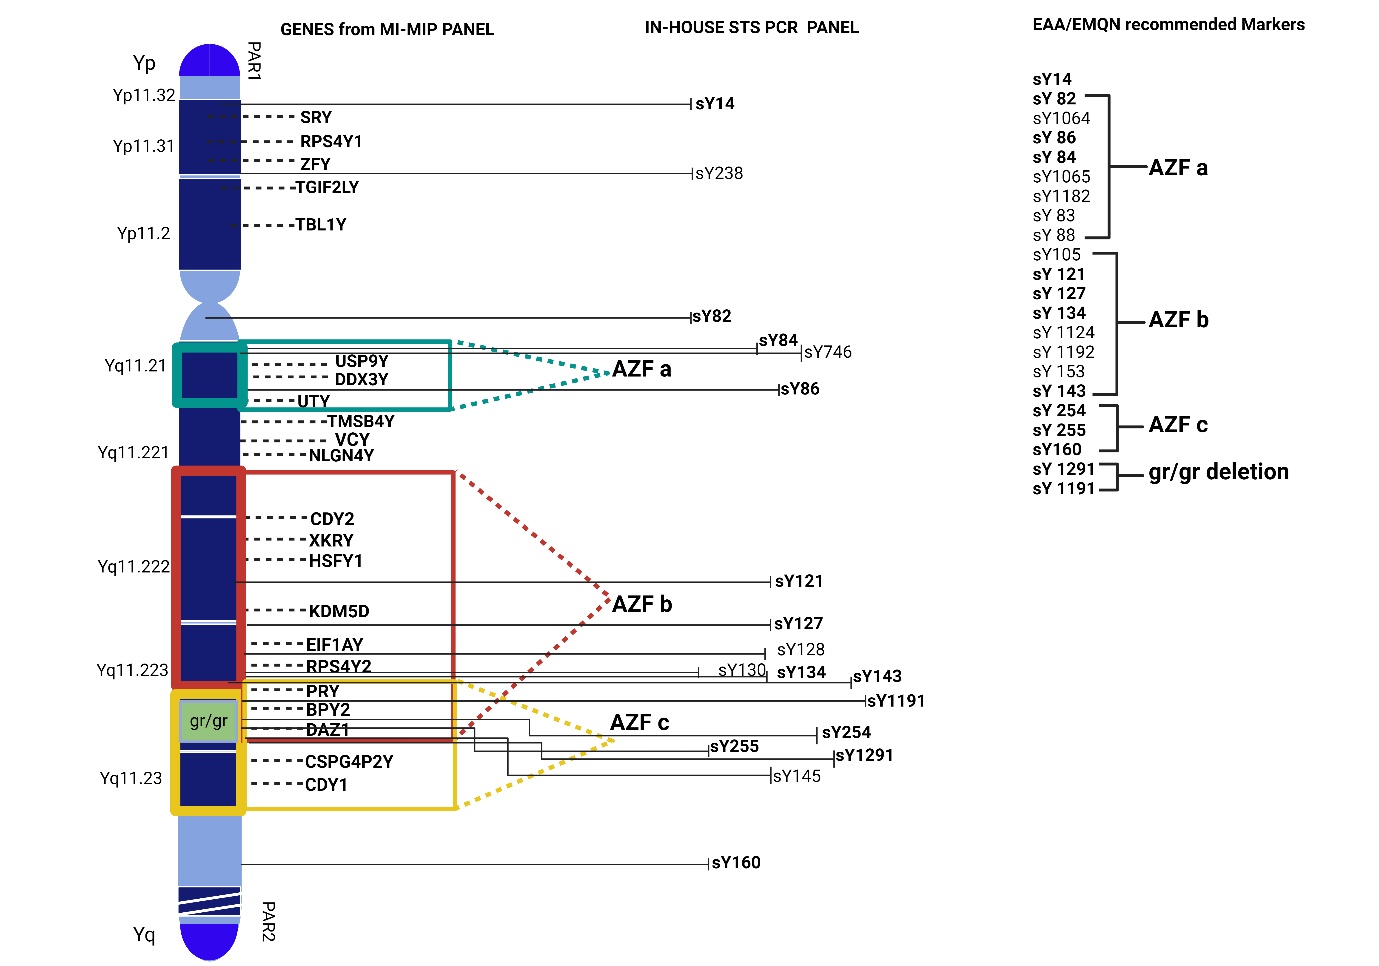


**Supplementary File 1**:**Mapping of Y chromosome microdeletion detection strategies**. Schematic representation of the Y chromosome depicting infertility associated genes targeted by the smMIP base targeted sequencing assay. AZF regions: AZFa (blue dotted outline), AZFb (red dotted outline), AZFc (yellow dotted outline), and the gr/gr partial deletion region (green) are delineated according to EAA/EMQN 2023 guidelines. The inclusion of key genes in targeted gene sequencing assay and STS markers ensures concordance with established diagnostic standards for Y-chromosomal microdeletion screening in male infertility.

(Ref: Krausz C, Navarro-Costa P, Wilke M, Tüttelmann F. EAA/EMQN best practice guidelines for molecular diagnosis of Y-chromosomal microdeletions: State of the art 2023. Andrology. 2024 Mar;12(3):487-504. doi: 10.1111/andr.13514. Epub 2023 Sep 6. PMID: 37674303.)
