# Supplementary material for: Genetic diversity of infertile males in India
Source: Research Square preprint supplement (doi:10.21203/rs.3.rs-7849365/v1), 2025-10-31
Supplement: Supplementary file 9 [file ae2c5d6965bd0c6f9472dfc0.xlsx]

## Sheet: Sheet1
Supplementary Table 8: Primer sequences for Sanger sequencing of de novo variants
Gene	Genomic coordinates	Left primer	Right primer
DGKG	chr3-186280015-G-A	TACAGAGTCATCCATCCCCA	GCAAACCAGAGCCCACAG
BMP2K	chr4-78911750-C-A	CCTACCTATCGCACTCCAGA	AAGTTCTGTAAAGGGCACGG
FBXW8	chr12-116949688-A-G	TGCTGTAGAGAATTGCTGTGG	CATGGGCTGTAACTGAGGGA
PDE6B	chr4-667997-G-A	CTGGTGGTGACTTCTCGACT	CTCTCTCCCTGCACTGTGG
FGFR3	chr4-1799280-C-A	AGAGACCTTTGGCCCTTTTG	TGTAGGCCCCGGAGTCCT
CACNB3	chr12-48826942-A-C	GTACTCCAGCGTCTCATTCG	AATGGTTACCTGAAGTCCGG
FAM83E	chr19-48613384-G-A	TGCACGCAGGTCTGGAAC	GCAGCGTGATTGTCAGAACA
PUM2	chr2-20256086-C-T	TGCCCTGCTAACAAATTATAAGC	TGGTAAAGGAGCTGGATGGT
ID4	chr6-19838075-G-A	TGCAGTGCGATATGAACGAC	GGTGTTGAGCGCAGTGAG
TMTC3	chr12-88166543-T-C	CCTTCCTGTGAATGCTTGGT	AATTGGGATGCCGTTGAACA
SPATA5L	chr15-45403160-G-C	CTGGGAGGTCTTTCGGAGG	CACGTTCTCCTCGGTCTCC
SIDT2	chr11	GCAGGGTCATTCGGCAGT	CCCGCTGCACAGTATCCA
PDYN-AS1	chr20-1983044-A-G	ACCTTGCCTGAAACCTACCA	GACTTTGTGGGCTCAGAACA
SMPDL3B	chr1-27949057-T-C	GACCCACAGCAGGAAAATGG	TGTTGTCCCACTGTGCCA
FREM3	chr4-143577825-C-T	GTACAAAGGTGAATGCCGCA	TCCAAGCACTGCACCCATAG
CCDC183	chr9-136805395-C-T	GATGCCTGTGTCTTGGGTG	TGTGTCCATTTCAGAGTGCC
SNX29	chr16-12560907-C-T	AAACCAACCTCTGCTCCTGA	GGCCTTTACCTCCTACCTCT
STXBP2	chr19-7639677-A-C	CTCTCAGAACCTCAGTCTCCC	GCATACACACACGCTCACTC
SMARCC2	chr12-56172622-C-T	GGAGCCTGTGACCTCTGAG	CTCCCGGTGGTCACTTGTAC
ACSS1	chr20-25014057-G-A	AGGCCCATACACACCTTCTC	GTTTCCTTGCCCACAACAGG
UTRN	chr6	TTCTTTTCTCCCAGCCCTCT	CATCAATGTTTACACCCAAATCA
KCNF1	chr2-10913809-G-A	CTGGAGCTGATGGAACTCAA	GTCCTGTGGTGCTTCTCCTC
SLC26A9	chr1-205929371-A-G	AAGATGAGCGAGGCGATGTT	GGTGTGCCTCCATTAGCTTT
ZNF362	chr1-33276239-C-T	AACAACCCCTACTTCTGGCC	GAAGAAGAGGACGGGCTGAG
LRRC63	chr13-46227739-A-AC	TGGATAGAACTCGTTTTCCTGAT	TTTGAGCGATAACTGAGCCA
MYOCD	chr17-12763677-A-G	CCCCAGCATCTTCAACATCG	TTTGTTCTTGTTCATTGGCACA
LUC7L3	chr17-50744718-ATAG-A	TGGGGAAATGGAAAAGAGCA	AGAATCTGCCTCAAAACAAACAA
SCN10A	chr3-38752328-AG-A	AGACATCGACAGCTCCAGG	GTGTGTTCCATTTCCGGTCC
SACS	chr13-23329459-G-A	TGTTGTCTTGGCAAGCAGTT	CGTTATTTTCTCATCAGCTGGC
MYBPC3	chr11-47332610-C-T	GGAGAGGACTGCTCAACGTC	CACCTATGAGCCACCCAACT
LTBP1	chr2-33222135-C-T	TGGCTTCAGATATCACTTACACT	AGGAGTGAACATGAGGTGGT
KIAA0825	chr5-94417312-C-T	AATGTCTCATACCTGGGATGTT	AAAACCATTTCCACAGCATT
ABCA13	chr7-48489326-G-C	CGAGCTAATTTCGTGAGAGC	ACGGATTGGTTGCCAAGTAG
FBXO16	chr8-28447252-C-T	GTCATGGCTTCTCTGCCAGT	TGGAGATGCAGGAGTTGATG
MINK1	chr17-4894334-C-T	TGCCCTCTGTCCTGTAGACC	GACAGCAGTCAGGCAAACAA
FAM171A2	chr17-44355707-G-A	CTGTCTTCAACCACCAGCAC	AAGGCAGGAAGGGTGTCTAC
KPNB1	chr17-47682401-C-T	GGCACATAGGACAAGAAGAAAG	TGTGTTTTCAAGCCTCACTCA
INTS1	chr7-1498936-A-C	CAGTTCATGCAGACGGACAT	CCATCGACAACGTCTCCAG
RAMP3	chr7-45183480-C-T	GCTGATCGTTATACCCGTCG	ACTGGCCCTAGAATGAGCAA
VPS16	chr20-2864975-T-C	GTGTCAGAGGAGCTAGCCAT	GAGCCGCATTTGATCCTCTG
ARR3	chrX-70281103-C-T	TTCAGGGGAAGTGTGTGTGT	AGCCATATGTTTCCACTGCAC
