# Supplementary material for: Genetic diversity of infertile males in India
Source: Research Square preprint supplement (doi:10.21203/rs.3.rs-7849365/v1), 2025-10-31
Supplement: Supplementary file 10 [file bcb3241ff1d7acd574e6a971.xlsx]

## Sheet: Validation cohort
Supplementary Table 6: Data from validation run of smMIP based targeted sequencing assay in 20 samples
Sr.No.	Sample ID	Phenotype	Genomic coordinate	Gene	Transcript	MIP panel (CNV-call)	Method of diagnosis (STS PCR/Sanger/Karyotype)	STS Markers detected	WES results	Concordant/ Discordant	Comment
1	MI-050	Non-obstructive azoospermia	Microdeletion in Chr Y in the region q11.222 to q11.223	KDM5D, EIF1AY, RPS4Y2, PRY, BPY2, DAZ1	NM_004653.5, NM_004681.4, NM_001039567.3 NM_004676.2, NM_004678.3, NM_004081.6	CNV: KDM5D, EIF1AY, RPS4Y2, PRY, BPY2, DAZ1	Yq microdel:Parital AZFb+complete gr/gr deletion	SY1291, sY1191, sY134, sY127, sY121	Not done	Concordant	-
2	MI-124	Severe oligoasthenoteratozoospermia	Microdeletion in Chr Y in the region q11.223	PPP1R12BP2 pseudogene	NR_002176.1	NOT Detected (region not covered by panel from DAZ2 gene & TTTY3B)	STS PCR (Yq microdel:Parital gr/gr deletion)	SY1291	Not done	Discordant*	PPP1R12BP2 pseudogene not covered in the panel
3	MI-179	Azoospermia	Microdeletion in Chr Y in the region q11.223	PPP1R12BP2 pseudogene	NR_002176.1	NOT Detected (region not covered by panel from DAZ2 gene & TTTY3B)	STS PCR (Yq microdel:Parital gr/gr deletion)	SY1291	Not done	Discordant*	PPP1R12BP2 pseudogene not covered in the panel
4	MI-186	Anejaculation	Microdeletion in Chr Y in the region q11.223	PPP1R12BP2 pseudogene	NR_002176.1	NOT Detected (region not covered by panel from DAZ2 gene & TTTY3B)	STS PCR (Yq microdel:Parital gr/gr deletion)	SY1291	Not done	Discordant*	PPP1R12BP2 pseudogene not covered in the panel
5	MI-015	Oligozoospermia+Teratozoospermia	Microdeletion in Chr Y in the region q11.223	PPP1R12BP2 pseudogene	NR_002176.1	NOT Detected (region not covered by panel from DAZ2 gene & TTTY3B)	STS PCR (Yq microdel:Parital gr/gr deletion)	SY1291	Not done	Discordant*	PPP1R12BP2 pseudogene not covered in the panel
6	MI-199	Azoospermia	Microdeletion in Chr Y in the region q11.222 to q11.223	KDM5D, EIF1AY, RPS4Y2, PRY, BPY2, DAZ1	NM_004653.5, NM_004681.4, NM_001039567.3 NM_004676.2, NM_004678.3, NM_004081.6	CNV: KDM5D, EIF1AY, RPS4Y2, PRY, BPY2, DAZ1	STS PCR (Yq microdel: Partial gr/gr and AZFb deletion)	sY134, sY127,sY130, sY1291	Not done	Concordant	-
7	MI-012	Severe Oligospermia + Teratozoospermia	Microdeletion in Chr Y in the region q11.23	TTTYL4, DAZ 2, DAZ 3 and DAZ 4	NM_020363.3	NOT Detected (region not covered by panel DAZ2 gene & TTTYL7)	STS PCR (Yq microdel:Parital gr/gr deletion)	sY1291, sY1206	Not done	Discordant*	Genes TTTYL4, DAZ 2, DAZ 3 and DAZ 4 not covered in the panel
8	MI-080	Severe Oligoasthenoteratozoospermia	Microdeletion in Chr Y in the region q11.23	DAZ 2, DAZ 3 and DAZ 4	NM_004081.6	NOT Detected (region not covered by panel DAZ4 gene)	STS PCR (Yq microdel:Parital AZFc)	sY255	Not done	Discordant*	Genes DAZ 2, DAZ 3 and DAZ 4 not covered in the panel
9	MI-081	Globozoospermia	Microdeletion in the region chr12:g.(?_63952693)_(64062354_?)del	DPY19L2	NC_000012.11	DPY19L2_chr12:g.(?_63952693)_(64062354_?)del	Q-PCR (Microdeltion in 12q14.2 region)	No deletion of 16 STR markers on Yq-chromosome	Not done	Concordant	-
10	MI-188	Severe Oligoasthenoteratozoospermia	Microdeletion in Chr Y in the region q11.222 to q11.223	KDM5D, EIF1AY, RPS4Y2, PRY, BPY2, DAZ1	NM_004653.5, NM_004681.4, NM_001039567.3 NM_004676.2, NM_004678.3, NM_004081.6	Yq microdel: KDM5D, EIF1AY, RPS4Y2, PRY, BPY2, DAZ1	STS PCR (Yq microdel:Parital AZFb+complete gr/gr deletion)	sY1191, sY127, sY134	Not done	Concordant	-
11	MI-197	Severe Oligoasthenoteratozoospermia	Microdeletion in Chr Y in the region q11.23	DAZ 2, DAZ 3, DAZ 4, TTTYL4	NM_004081.6	NOT Detected (region not covered by panel DAZ 2,3,4 gene)	STS PCR (Yq microdel:Partial AZFc+ gr/gr deletion)	sY1291, sY254, sY255	Not done	Discordant*	Genes TTTYL4, DAZ 2, DAZ 3 and DAZ 4 not covered in the panel
12	MI-039	Azoospermia	Microduplication in Chr X in the region p21.1 to q13.1	TEX11 + NR0B1	NM_031276.3 and NM_000475.5	Duplication of chrX (XXY) Klinefelter syndrome	Karyotype (47,XXY)	No deletion of 16 STR markers on Yq-chromosome	Not done	Concordant	-
13	MI-045	Azoospermia	Microdeletion in Chr Y in the region q11.222 to q11.223	KDM5D, EIF1AY, RPS4Y2, PRY, BPY2, DAZ1	NM_004653.5, NM_004681.4, NM_001039567.3 NM_004676.2, NM_004678.3, NM_004081.6	CNV: KDM5D, EIF1AY, RPS4Y2, PRY, BPY2, DAZ1	STS PCR (Yq microdel: Parital AZFb+complete gr/gr deletion)	sY130, sY128, sY134, sY127, sY121	Concordant	Concordant	-
14	MI-091	Severe Oligoasthenoteratozoospermia	No caustative variant	-	-	False CNV call	-	-	Done (No causative variant)	Concordant	-
15	MI-207	Non-obstructive azoospermia	No caustative variant	-	-	False CNV call	-	-	Done (No causative variant)	Concordant	-
Sr.No.	Sample ID	Phenotype	Genomic coordinate	Gene	Transcript	Exon/ Intron	Variant	Protein change	Variant Type	Depth (x)	Zygosity	MIP panel (CNV-call)	STS PCR Result	Concordance
16	MI-017	Non-obstructive azoospermia	chr7:g.117188852T>C	CFTR	NM_000492.4	Exon 10	c.1367T>C	p.Val456Ala	Missense	846 (C:154/T:691)	Heterozygous	No putative CNV detected	No Yq Deletion	Concordant
17	D-5834	Cystic fibrosis/ CBAVD/ Azoospermia	chr7:g.117230432T>G	CFTR	NM_000492.4	Exon 13	c.1705T>G	p.(Tyr569Asp)	Missense	440 (G:222/T:218)	Compound Heterozygous	No putative CNV detected	No Yq Deletion	Concordant
			chr7:g.117267579C>T			Exon 22	c.3472C>T	p.(Arg1158*)	stop gained	294 (C:160/T:134)
18	D-7282	Cystic fibrosis/ CBAVD/ Azoospermia	chr7:g.117199644ATCT>A	CFTR	NM_000492.4	Exon 11	c.1521_1523del	p.(Phe508del)	In-frame deletion	844 (833 del)	Homozygous	No putative CNV detected	No Yq Deletion	Concordant
19	D-5044	Cystic fibrosis/ CBAVD/ Azoospermia	chr7:g117254773T>C	CFTR	NM_000492.4	Intron 21	c.3468+6T>C	p.?	Splice region variant	260 (C:138/T:122)	Compound Heterozygous	No putative CNV detected	No Yq Deletion	Concordant
			chr7:g.117188660_117188660			Intron 9	IVS85T	5T/12TG	Splice region variant	46 (36 DEL)
20	MI-099	Severe Oligozoospermia	chr3:g.52396477C>G	DNAH1	NM_015512.5	Exon 31	c.5054 C>G	p.Pro1685Arg	Missense	376 (C:172/G:204)	Compound Heterozygous	No putative CNV detected	No Yq Deletion	Concordant
			chr3:g.52420217GA>G			Exon 55	c.8668del	p.Thr2890Glnfs*46	Frameshift	122 (100 del)
*	Region not covered by the panel
