# Supplementary material for: Genetic diversity of infertile males in India
Source: Research Square preprint supplement (doi:10.21203/rs.3.rs-7849365/v1), 2025-10-31
Supplement: Supplementary file 11 [file c8137767af993e631baebfc7.docx]

**Supplementary Table 4:** List of genes sequenced by the targeted sequencing assay.

| **Gene** | **Location** | **Disorder** | **Number of smMIPs** | **Inheritance pattern** | **Gene–disease relationship (GDR)*** |
| --- | --- | --- | --- | --- | --- |
| **Isolated infertility** | | | | | |
| *SYCP3* | 12q23.2 | Isolated infertility- Non-obstructive azoospermia; OMIM:270960 | 21 | AD | Strong |
| *DPY19L2* | 12q14.2 | Isolated infertility- Globozoospermia; OMIM:613958 | 47 | AR | Definitive |
| *KLHL10* | 17q21.2 | Isolated infertility- Oligozoospermia; OMIM:615081 | 27 | AD | Moderate |
| *AURKC* | 19q13.43 | Isolated infertility- Macrozoospermia; OMIM:243060 | 16 | AR | Definitive |
| *MEI1* | 22q13.2 | Isolated infertility- Non-obstructive azoospermia; OMIM:NA (PS258150) | 83 | AR | Strong |
| *DNAH1* | 3p21.1 | Isolated infertility- Multiple morphological abnormalities of the sperm flagella;  OMIM:617576 | 235 | AR | Definitive |
| *DMRT1* | 9p24.3 | Isolated infertility- Non-obstructive azoospermia; OMIM:NA (PS258150) | 18 | AD | Moderate |
| *CFTR* | 7q31.2 | Congenital bilateral/unilateral absence of vas deferens;OMIM:277180 | 81 | AR | Definitive |
| *TEX11* | Xp11 | Isolated infertility- Non-obstructive azoospermia; OMIM:309120 | 62 | XL | Definitive |
| **Syndromic infertility** | | | | | |
| *CATSPER2* | 15q15.3 | Syndromic infertility- Deafness infertility syndrome; OMIM: 611102 | 59 | AR | Moderate |
| *CCDC40* | 17q25.3 | Syndromic infertility- Primary ciliary dyskinesia; OMIM:613808 | 67 | AR | Strong |
| *CCDC39* | 3q26.33 | Syndromic infertility- Primary ciliary dyskinesia; OMIM:613807 | 57 | AR | Strong |
| **Reproductive system syndrome/endocrine disorder** | | | | | |
| *LHCGR* | 2p16.3 | Leydig cell dysfunction with hypogonadism; OMIM:238320 | 35 | AR | Definitive |
| *LHCGR* | 2p16.3 | Male precocious puberty; OMIM:176410 | AD | Definitive |
| *TACR3* | 4q24 | Kallmann syndrome; OMIM:614840 | 21 | AR | Definitive |
| *CYP21A2* | 6p21.33 | Classic congenital adrenal hyperplasia; OMIM:201910 | 58 | AR | Definitive |
| *CYP21A2* | 6p21.33 | Non-classic adrenal hyperplasia (late onset or no CAH symptoms); OMIM: 201910 | AR | Definitive |
| *NR5A1* | 9q33.3 | 46,XY Disorders of sexual development (Prader scale 4; 5 or 6); OMIM:612965 | 25 | AD | Definitive |
| *NR5A1* | 9q33.3 | 46,XX Disorders of sexual development (Prader scale 4; 5 or 6); OMIM:617480 | AD | Definitive |
| *NR5A1* | 9q33.3 | Isolated spermatogenic failure; OMIM:184757 | AD | Strong |
| *NR0B1* | Xp21.2 | Congenital adrenal hypoplasia; OMIM:300200 | 17 | XL | Definitive |
| *NR0B1* | Xp21.2 | Late-onset adrenal failure or isolated hypogonadotropic hypogonadism;  OMIM:NA (PS147950) | XL | Definitive |
| *SRY* | Yp11.2 | 46,XX Disorders of sexual development (Prader scale 4; 5 or 6); OMIM:400045 | 7 | YL | Definitive |
| *SRY* | Yp11.2 | 46,XY Disorders of sexual development (Prader scale 4; 5 or 6); OMIM:400044 | YL | Definitive |
| **Yq microdeletion and AZF region** | | | | | |
| *USP9Y* | Yq11.221 | Associated with spermatogenic failure; Azoospermia, hypospermatogenesis (OMIM:415000) | 125 | YL | Unable to classify |
| *DDX3Y* | Yq11.221 | Azoospermia, Sertoli cell-only syndrome, severe hypospermatogenesis (OMIM:400042) | 37 | YL | Unable to classify |
| *UTY* | Yq11.221 | Spermatogenic failure, Y-linked, 1(OMIM:400042) | 77 | YL | Unable to classify |
| *TMSB4Y* | Yq11.221 | AZFa Proximal border (OMIM:400017) | 3 | YL | Unable to classify |
| *VCY* | Yq11.221 | AZFb (borderline AZFa-b) (OMIM:400012) | 6 | YL | Unable to classify |
| *NLGN4Y* | Yq11.221 | Non-AZF associated (OMIM: 400028) | 30 | YL | Unable to classify |
| *XKRY* | Yq11.222 | Median and Distal part of AZF b+c (OMIM:400015) | 4 | YL | Unable to classify |
| *CDY2* | Yq11.222 | Median and Distal part of AZF b+c (OMIM:400018) | 16 | YL | Unable to classify |
| *HSFY* | Yq11.222 | Azoospermia (OMIM:400029) | 14 | YL | Unable to classify |
| *KDM5D* | Yq11.222 | AZFa Proximal border (OMIM:426000) | 74 | YL | Unable to classify |
| *EIF1AY* | Yq11.223 | Non-obstructive azoospermia (OMIM:400014) | 12 | YL | Unable to classify |
| *RPS4Y2* | Yq11.223 | AZFb Proximal border (OMIM: 400030) | 14 | YL | Unable to classify |
| *PRY* | Yq11.223 | AZFb Proximal border (OMIM:400019) | 6 | YL | Unable to classify |
| *BPY2* | Yq11.223 | Azoospermia and oligozoospermia (OMIM:400013) | 7 | YL | Unable to classify |
| *DAZ* | Yq11.223 | Azoospermia, oligozoospermia(OMIM:400003) | 45 | YL | Unable to classify |
| *CDY1* | Yq11.23 | Median and Distal part of AZF b- Non-obstructive azoospermia (OMIM:400016) | 18 | YL | Unable to classify |
| *CSPG4P1Y* | Yq11.23 | b2/b3 deletion within the AZFc region(OMIM:400034) | 9 | YL | Unable to classify |
| *RPS4Y1* | Yp11.31 | Non-AZF associated (OMIM: 470000) | 14 | YL | Unable to classify |
| *ZFY* | Yp11.31 | Non-AZF associated (OMIM:490000) | 28 | YL | Unable to classify |
| *TGIF2LY* | Yp11.2 | Non-AZF associated (OMIM:400025) | 6 | YL | Unable to classify |
| *TBL1Y* | Yp11.2 | Non-AZF associated - ?Deafness, Y-linked 2 (OMIM:400047) | 26 | YL | Unable to classify |

AD: autosomal dominant

AR: autosomal recessive

XL: X linked

YL: Y linked

smMIP: single molecule molecular inversion probe

* Gene disease relationship based on Houston et al. 2022.
