# Supplementary material for: Genetic diversity of infertile males in India
Source: Research Square preprint supplement (doi:10.21203/rs.3.rs-7849365/v1), 2025-10-31
Supplement: Supplementary file 12 [file c851cdf47875fad882140da2.xlsx]

## Sheet: Supplementary 11
Supplementary Table 10: Candidate de novo variants detected by whole exome sequencing across trios
Patient ID/ Trio ID	Age of father at the conception of proband	Age of mother at the conception of proband	No of variants identified	Chromosome	Start position	Reference	Variant	DeNovoCNN probability	Proband coverage	% of reads containing variant	Father coverage	% of reads containing variant	Mother coverage	% of reads containing variant	Requires Sanger validation (yes/ no)	Sanger sequencing based validation													Association with MI
																Gene	cDNA change	amino acid change	Gene pLOUEF score	Variant MAF (gnomAD database)	REVEL	AlphaMissense	Testis expression (Human Protein Atlas)	Mouse sperm phenotype (MGI database)	ACMG variant classification*	Forward Primer	Reverse Primer	Validated (yes/ no)
MI-029	25	22	1	chr3	186280015	G	A	0.99	73	50	116	0	79	0	Yes	DGKG	c.670-42C>T	p.?	0.92	5.97e-05	N/A	N/A	Tissue enhanced (Brain)	No phenotype	VUS	TACAGAGTCATCCATCCCCA	GCAAACCAGAGCCCACAG	Yes	No
			2	chr4	78911750	C	A	0.998	186	49	334	0	190	0	Yes	BMP2K	c.3203C>A	p.Pro1068His	0.77	N/A	Uncertain (0.36)	Uncertain (0.382)	Low tissue specificity	No phenotype	VUS	CCTACCTATCGCACTCCAGA	AAGTTCTGTAAAGGGCACGG	Yes	No
			3	chr12	116949688	A	G	0.992	157	50	270	0	108	0	Yes	FBXW8	c.659A>G	p.Asp220Gly	1.2	N/A	Benign (Supporting) (0.28)	Benign (Moderate) (0.09)	Low tissue specificity	No phenotype	VUS	TGCTGTAGAGAATTGCTGTGG	CATGGGCTGTAACTGAGGGA	Yes	No
			4	chr17	64506019	G	GT	0.574	48	0	100	0	51	0	No	DDX5	-	-	-	-	-	-	-	-	-	-	-	-
			5	chr19	48110531	T	TGCTCCGGAATCCGGTGCGGAGGCTTGG	0.706	109	12	335	20	108	0	No	PLA2G4C	-	-	-	-	-	-	-	-	-	-	-	-
MI-105	25	22	1	chr2	21003346	GA	G	0.622	52	6	43	1	50	1	No	APOB	-	-	-	-	-	-	-	-	-	-	-	-
			2	chr3	52230113	T	G	0.94	62	25	49	0	71	0	No	TWF2	-	-	-	-	-	-	-	-	-	-	-	-
			3	chr3	58867813	A	C	0.788	51	21	62	0	56	0	No	CFAP20DC	-	-	-	-	-	-	-	-	-	-	-	-
			4	chr3	187000000	G	GGA	0.57	37	100	36	100	42	100	No	MASP1	-	-	-	-	-	-	-	-	-	-	-	-
			5	chr4	667997	G	A	0.797	67	37	68	0	68	0	Yes	PDE6B	c.2494G>A	p.Ala832Thr	1.24	N/A	Benign (Moderate) (0.15)	Benign (Strong) (0.065)	Tissue enriched (Retina)	No phenotype	VUS	CTGGTGGTGACTTCTCGACT	CTCTCTCCCTGCACTGTGG	Yes	No
			6	chr4	1799280	C	A	0.997	95	44	78	0	77	1	Yes	FGFR3	c.136C>A	p.Gln46Lys	0.46	N/A	Benign (Moderate) (0.1)	Benign (Moderate) (0.087)	Tissue enhanced (Brain, Esophagus, Skin)	Reduced female fertility, male infertility	VUS	AGAGACCTTTGGCCCTTTTG	TGTAGGCCCCGGAGTCCT	Yes	No
			7	chr4	42120292	TCCCTGGAAAAGCGAAATATTTTCTCATTA	T	0.904	53	27	110	0	120	0	No	BEND4	-	-	-	-	-	-	-	-	-	-	-	-
			8	chr4	168000000	A	C	0.713	76	17	93	0	108	0	No	DDX60L	-	-	-	-	-	-	-	-	-	-	-	-
			9	chr6	25495079	A	C	0.981	52	29	45	0	68	0	No	CARMIL1	-	-	-	-	-	-	-	-	-	-	-	-
			10	chr9	111000000	G	GA	0.745	40	100	38	100	45	100	No	ECPAS	-	-	-	-	-	-	-	-	-	-	-	-
			11	chr11	193112	C	T	0.506	36	92	183	6	231	8	No	SCGB1C1	-	-	-	-	-	-	-	-	-	-	-	-
			12	chr11	6600888	T	G	0.937	35	21	47	0	42	0	No	RRP8	-	-	-	-	-	-	-	-	-	-	-	-
			13	chr12	48826941	A	C	0.694	57	26	77	0	80	0	No	CACNB3	-	-	-	-	-	-	-	-	-	-	-	-
			14	chr12	48826942	A	C	0.974	56	33	75	0	75	0	Yes	CACNB3	c.991-32A>C	p.?	0.72	0.00747	N/A	N/A	Tissue enhanced (Brain)	No phenotype	VUS	GTACTCCAGCGTCTCATTCG	AATGGTTACCTGAAGTCCGG	No	No
			15	chr12	124000000	A	C	0.54	43	18	35	0	53	0	No	NCOR2	-	-	-	-	-	-	-	-	-	-	-	-
			16	chr13	97990228	T	G	0.966	70	22	70	0	105	0	No	IPO5	-	-	-	-	-	-	-	-	-	-	-	-
			17	chr16	70226947	T	G	0.688	66	30	66	0	73	0	Yes	SMG1P7	-	-	-	-	-	-	-	-	-	-	-	-
			18	chr17	57002242	T	G	0.576	33	19	32	0	38	0	No	SCPEP1	-	-	-	-	-	-	-	-	-	-	-	-
			19	chr19	1918861	A	C	0.928	45	26	67	1	73	0	No	SCAMP4	-	-	-	-	-	-	-	-	-	-	-	-
			20	chr19	48613384	G	A	0.987	58	50	38	0	47	2	Yes	FAM83E	c.-12C>T	p.?	1.42	5.08e-06	N/A	N/A	Tissue enhanced (Intestine, Salivary gland, Stomach)	No phenotype	VUS	TGCACGCAGGTCTGGAAC	GCAGCGTGATTGTCAGAACA	Yes	No
			21	chrX	71246543	A	C	0.939	107	15	103	0	235	0	No	ZMYM3	-	-	-	-	-	-	-	-	-	-	-	-
MI-123	28	24	1	chr2	20256086	C	T	0.993	114	31	96	0	130	0	Yes	PUM2	c.2569G>A	p.Glu857Lys	0.58	2.76e-06	Uncertain (0.51)	N/A	Low tissue specificity	Reproductive system phenotype, seminiferous tubule degeneration, decreased testis weight	VUS	TGCCCTGCTAACAAATTATAAGC	TGGTAAAGGAGCTGGATGGT	Yes	No
			2	chr6	19838075	G	A	0.997	116	47	135	0	94	0	Yes	ID4	c.321G>A	p.Ala107=	1.94	1.17e-05	N/A	N/A	Tissue enhanced (Thyroid gland)	Abnormal ovary morphology, increased mature ovarian follicle number, increased secondary ovarian follicle number, increased tertiary ovarian follicle number, increased atretic ovarian follicle number, abnormal ovarian folliculogenesis, abnormal ovarian medulla morphology, decreased uterus weight	VUS	TGCAGTGCGATATGAACGAC	GGTGTTGAGCGCAGTGAG	Yes	No
			3	chr7	149000000	GCGC	G	0.722	39	4	44	0	39	0	No	EZH4	-	-	-	-	-	-	-	-	-	-	-
			4	chr12	88166543	T	C	1	71	42	56	0	75	0	Yes	TMTC3	c.1011T>C	p.Ser337=	0.72	6.842e-07	N/A	N/A	Low tissue specificity	No phenotype	VUS	CCTTCCTGTGAATGCTTGGT	AATTGGGATGCCGTTGAACA	Yes	No
			5	chr15	45403160	G	C	0.999	81	40	60	0	64	0	Yes	SPATA5L/AFG2B	c.731G>C	p.Gly244Ala	1.18	0	Deleterious (Strong) (0.94)	Uncertain (0.676)	Low tissue specificity	No phenotype	LP	CTGGGAGGTCTTTCGGAGG	CACGTTCTCCTCGGTCTCC	Yes	No
			6	chr19	46309445	TTC	T	0.708	44	4	32	0	54	1	No	HIF3A	-	-	-	-	-	-	-	-	-	-	-	-
			7	chrX	80691038	T	TA	0.864	41	100	30	97	81	100	No	BRWD3	-	-	-	-	-	-	-	-	-	-	-	-
MI-132	23	21	1	chr7	246502	G	GGACAGGTGAGCCCTTCCTTCCTCCCTCCATCCGC	0.729	87	100	138	100	126	100	No	FAM20C	-	-	-	-	-	-	-	-	-	-	-	No de novo variant identified
			2	chr7	5987677	C	T	0.896	31	23	37	11	32	0	No	PMS2	-	-	-	-	-	-	-	-	-	-	-
			3	chr8	63169422	A	AT	0.74	44	98	69	99	37	100	No	YTHDF3	-	-	-	-	-	-	-	-	-	-	-
MI-136	26	25	1	chr10	79712799	C	T	0.725	50	29	41	20	59	2	No	NUTM2B-AS1	-	-	-	-	-	-	-	-	-	-	-
			2	chr11	369844	AGCT	A	0.704	42	4	64	0	52	0	No	B4GLANT4	-	-	-	-	-	-	-	-	-	-	-
			3	chr11	117000000	A	-	0.999	180	48	151	0	189	0	Yes	SIK3	c.274-42934del	p.?	N/A	N/A	N/A	N/A	Low tissue specificity	Female infertility	VUS	GCAGGGTCATTCGGCAGT	CCCGCTGCACAGTATCCA	Yes	No
			4	chr11	134000000	G	GCCCCCC	0.79	54	0	53	0	48	0	No	IGSF9B	-	-	-	-	-	-	-	-	-	-	-	-
			5	chr12	56638439	G	GA	0.748	65	10	49	2	60	4	No	ATP5F1B	-	-	-	-	-	-	-	-	-	-	-	-
			6	chr17	28644947	CCCG	C	0.565	56	5	39	0	60	0	No	KIAAO100	-	-	-	-	-	-	-	-	-	-	-	-
			7	chr19	57508524	G	A	0.531	36	30	59	0	39	12	No	ZNF773	-	-	-	-	-	-	-	-	-	-	-	-
			8	chr20	1983044	A	G	0.98	99	41	75	0	90	0	Yes	PDYN-AS1	c.41T>C	p.Met14Thr	0.77	3.42e-06	Benign (Supporting) (0.19)	Benign (Moderate) (0.085)	Tissue enriched (Brain)	No phenotype	VUS	ACCTTGCCTGAAACCTACCA	GACTTTGTGGGCTCAGAACA	Yes	No
MI-138	17	11	1	chr1	27949057	T	C	0.992	93	43	101	0	95	0	Yes	SMPDL3B	c.276-8T>C	p.?	1.03	N/A	N/A	N/A	Tissue enhanced (Intestine, Pancreas)	No phenotype	VUS	GACCCACAGCAGGAAAATGG	TGTTGTCCCACTGTGCCA	Yes	No
			2	chr4	143577825	C	T	0.992	90	62	94	0	89	0	Yes	FREM3	c.6206G>A	p.Arg2069Gln	0.93	2.17e-05	Benign (Moderate) (0.06)	Benign (Strong) (0.065)	Tissue enhanced (Brain)	No phenotype	VUS	GTACAAAGGTGAATGCCGCA	TCCAAGCACTGCACCCATAG	Yes	No
			3	chr9	136805395	C	T	0.996	92	55	83	0	103	0	Yes	CCDC183	c.886C>T	p.Gln296Ter	1.23	N/A	N/A	N/A	Tissue enriched (Testis)	Abnormal sperm flagellum morphology, abnormal outer dense fiber morphology, abnormal sperm axoneme morphology, thick sperm flagellum, abnormal sperm mitochondrial sheath morphology, abnormal sperm principal piece morphology, abnormal sperm fibrous sheath morphology, absent sperm fibrous sheath, oligozoospermia, teratozoospermia, abnormal sperm head morphology, abnormal manchette morphology, impai…	LP	GATGCCTGTGTCTTGGGTG	TGTGTCCATTTCAGAGTGCC	Yes	Yes
			4	chr9	138052235	CGT	C	0.615	42	98	32	100	62	0	No	CACNA1B	-	-	-	-	-	-	-	-	-	-	-	-
			5	chr11	640369	G	C	0.532	55	100	36	54	40	50	No	DRD4	-	-	-	-	-	-	-	-	-	-	-	-
			6	chr16	12560907	C	T	0.708	56	59	46	2	53	0	Yes	SNX29	c.2319-7599C>T	p.?	0.95	2.28e-05	N/A	N/A	Low tissue specificity	No phenotype	VUS	AAACCAACCTCTGCTCCTGA	GGCCTTTACCTCCTACCTCT	Yes	No
			7	chr16	72058610	C	G	0.622	87	48	79	46	73	1	No	TXNL4B	-	-	-	-	-	-	-	-	-	-	-	-
			8	chr19	7639677	A	C	0.956	46	47	32	0	41	1	Yes	STXBP2	c.170-54A>C	p.?	0.87	N/A	N/A	N/A	Tissue enhanced (Lymphoid tissue)	No phenotype	LB	CTCTCAGAACCTCAGTCTCCC	GCATACACACACGCTCACTC	Yes	No
			9	chrX	49581825	CGT	C	0.545	30	100	32	94	55	98	No	GAGE12H	-	-	-	-	-	-	-	-	-	-	-	-
MI-151	17	12	1	chr1	66827054	TA	T	0.571	30	5	31	0	36	0	No	DNAI4	-	-	-	-	-	-	-	-	-	-	-	No de novo variant identified
			2	chr2	84441134	T	TA	0.789	66	10	48	1	54	1	No	SULCG1	-	-	-	-	-	-	-	-	-	-	-
			3	chr12	98595409	A	AT	0.516	46	7	43	4	66	4	No	SLC25A3	-	-	-	-	-	-	-	-	-	-	-
			4	chr17	60069867	GAC	G	0.543	45	6	45	0	76	0	No	HEATR6	-	-	-	-	-	-	-	-	-	-	-
			5	chrX	24364308	TG	T	0.7	80	0	66	0	180	0	No	SUPT20HL1	-	-	-	-	-	-	-	-	-	-	-
MI-155	29	15	1	chr12	56172622	C	T	0.993	151	49	115	0	112	0	Yes	SMARCC2	c.1826G>A	p.Arg609His	0.17	1.37e-06	Uncertain (0.5)	Uncertain (0.755)	Low tissue specificity	No phenotype	VUS	GGAGCCTGTGACCTCTGAG	CTCCCGGTGGTCACTTGTAC	Yes	No
			2	chr20	25014057	G	A	0.93	146	49	81	0	107	1	Yes	ACSS1	c.1356C>T	p.Cys452=	0.71	N/A	N/A	N/A	Tissue enhanced (Choroid plexus)	No phenotype	LB	AGGCCCATACACACCTTCTC	GTTTCCTTGCCCACAACAGG	Yes	No
MI-156	29	28	1	chr6	144000000	C	G	0.993	79	58	53	0	55	0	Yes	PLAGL1	c.-584+8090G>C	p.?	1.02	N/A	N/A	N/A	Tissue enhanced (Placenta)	No phenotype	VUS	TTCTTTTCTCCCAGCCCTCT	CATCAATGTTTACACCCAAATCA	Yes	No
			2	chr11	747445	TCGC	T	0.514	37	4	46	0	37	0	No	-	-	-	-	-	-	-	-	-	-	-	-	-
			3	chr16	81091109	TA	T	0.67	31	6	30	1	40	1	No	GCSH	-	-	-	-	-	-	-	-	-	-	-	-
MI-157	20	15	1	chr1	99709142	G	GA	0.746	36	100	46	100	48	100	No	FRRS1	-	-	-	-	-	-	-	-	-	-	-	No de novo varient identified
			2	chr5	128000000	A	AT	0.85	44	100	30	100	33	100	No	PRRC1	-	-	-	-	-	-	-	-	-	-	-
			3	chr8	41650568	A	C	0.557	45	27	45	2	57	3	No	NKX6-3	-	-	-	-	-	-	-	-	-	-	-
MI-158	33	23	-	-	-	-	-	-	-	-	-	-	-	-	-	-	-	-	-	-	-	-	-	-	-	-	-	No de novo varient identified
MI-159	31	16	1	chr1	216000000	G	GA	0.633	42	100	46	100	42	100	No	USH2A	-	-	-	-	-	-	-	-	-	-	-
			2	chr2	10913809	G	A	0.994	112	41	169	0	153	0	Yes	KCNF1	c.1383G>A	p.Ala461=	0.58	3.51e-05	N/A	N/A	Group enriched (Brain, Choroid plexus)	No phenotype	VUS	CTGGAGCTGATGGAACTCAA	GTCCTGTGGTGCTTCTCCTC	Yes	No
			3	chr3	179000000	TA	T	0.769	57	8	57	0	41	1	No	PIK3CA	-	-	-	-	-	-	-	-	-	-	-	-
			4	chr6	155000000	G	GA	0.598	33	100	39	100	37	100	No	NOX3	-	-	-	-	-	-	-	-	-	-	-	-
			5	chr7	20784424	AGCC	A	0.771	59	7	97	1	74	0	No	SP8	-	-	-	-	-	-	-	-	-	-	-	-
			6	chrX	50607728	T	TTCC	0.518	50	30	72	0	150	44	No	SHROOM4	-	-	-	-	-	-	-	-	-	-	-	-
MI-164	25	22	1	chr1	205929371	A	G	0.983	114	51	117	0	133	1	Yes	SLC26A9	c.718-15T>C	p.?	0.64	N/A	N/A	N/A	Group enriched (Salivary gland, Stomach)	No phenotype	VUS	AAGATGAGCGAGGCGATGTT	GGTGTGCCTCCATTAGCTTT	Yes	No
			2	chr2	202635603	GGCC	G	0.549	35	4	49	0	45	0	No	FAM117B	-	-	-	-	-	-	-	-	-	-	-	-
			3	chr5	141178734	GTC	G	0.578	35	0	368	0	119	0	No	PCDHB8	-	-	-	-	-	-	-	-	-	-	-	-
			4	chr6	107893550	G	GT	0.613	38	4	51	0	61	0	No	SEC63	-	-	-	-	-	-	-	-	-	-	-	-
			5	chr17	63811258	T	TA	0.703	33	5	52	0	44	1	No	DDX42	-	-	-	-	-	-	-	-	-	-	-	-
			6	chr19	49054954	T	G	0.527	113	100	231	13	262	24	No	CGB7	-	-	-	-	-	-	-	-	-	-	-	-
MI-194	31	25	1	chr1	33276239	C	T	0.991	96	58	64	0	102	0	Yes	ZNF362	c.102+76C>T	p.?	0.45	6.921e-07	N/A	N/A	Low tissue specificity	No phenotype	VUS	AACAACCCCTACTTCTGGCC	GAAGAAGAGGACGGGCTGAG	No	No
			2	chr2	219253354	CG	C	0.804	74	16	70	2	87	4	No	TUBA4B	-	-	-	-	-	-	-	-	-	-	-	-
			3	chr7	135059156	AT	A	0.627	57	8	46	0	40	0	No	AGBL3	-	-	-	-	-	-	-	-	-	-	-	-
			4	chr9	65284243	C	T	0.616	81	23	68	6	77	0	No	FOXD4L5	-	-	-	-	-	-	-	-	-	-	-	-
			5	chr10	133072760	G	GT	0.596	44	5	36	0	45	0	No	-	-	-	-	-	-	-	-	-	-	-	-	-
			6	chr10	133072764	GA	G	0.59	39	5	41	0	48	0	No	-	-	-	-	-	-	-	-	-	-	-	-	-
			7	chr13	46227739	A	AC	0.998	86	36	65	0	102	0	Yes	LRRC63	c.314dup	p.Gly106TrpfsTer9	1.3	N/A	N/A	N/A	Tissue enhanced (Brain, Epididymis, Retina, Testis)	No phenotype	VUS	TGGATAGAACTCGTTTTCCTGAT	TTTGAGCGATAACTGAGCCA	Yes	No
			8	chr17	12763677	A	G	0.958	62	44	61	0	69	0	Yes	MYOCD	c.*33A>G	p.?	0.4	1.16e-05	N/A	N/A	Tissue enhanced (Intestine)	No phenotype	VUS	CCCCAGCATCTTCAACATCG	TTTGTTCTTGTTCATTGGCACA	Yes	No
			9	chr17	50744718	ATAG	A	0.996	61	37	74	0	115	0	Yes	LUC7L3	c.602_604del	p.Val201del	0.22	N/A	N/A	N/A	Low tissue specificity	No phenotype	VUS	TGGGGAAATGGAAAAGAGCA	AGAATCTGCCTCAAAACAAACAA	Yes	No
			10	chr22	28724937	G	GA	0.697	74	12	56	1	75	2	No	CHEK2										-	-	-
MI-207	30	28	1	chr3	38752328	AG	A	0.999	79	57	182	0	219	0	Yes	SCN10A	c.1645del	p.Leu549SerfsTer53	1.06	N/A	N/A	N/A	Not detected	No phenotype	VUS	AGACATCGACAGCTCCAGG	GTGTGTTCCATTTCCGGTCC	Yes	No
			2	chr5	98774162	AGCT	A	0.508	55	9	79	0	53	1	No	-	-	-	-	-	-	-	-	-	-	-	-	-
			3	chr7	1.44E+08	G	A	0.646	45	33	54	0	44	16	No	-	-	-	-	-	-	-	-	-	-	-	-	-
			4	chr9	133000000	T	TCTGGGGTTCACTGTCATATTCCAGGGGC	0.676	152	21	189	0	187	15	No	-	-	-	-	-	-	-	-	-	-	-	-	-
			5	chr13	23329459	G	A	0.989	33	39	48	0	35	0	Yes	SACS	c.*677C>T	p.?	0.64	0.00854	N/A	N/A	Low tissue specificity	Small uterus	B	TGTTGTCTTGGCAAGCAGTT	CGTTATTTTCTCATCAGCTGGC	No	No
			6	chr16	153841	T	TG	0.554	56	49	65	56	79	61	No	-	-	-	-	-	-	-	-	-	-	-	-
MI-213	26	21	1	chr2	177000000	CT	C	0.549	49	8	65	0	59	1	No	AGPS	-	-	-	-	-	-	-	-	-			-
			2	chr3	190000000	AGT	A	0.521	41	5	57	0	35	0	No	TP63	-	-	-	-	-	-	-	-	-			-
			3	chr11	47332610	C	T	0.994	184	44	197	0	108	0	Yes	MYBPC3	c.3583G>A	p.Gly1195Ser	0.92	6.842e-07	Deleterious (Supporting) (0.68)	Uncertain (0.336)	Tissue enriched (Heart muscle)	No phenotype	VUS	GGAGAGGACTGCTCAACGTC	CACCTATGAGCCACCCAACT	Yes
			4	chr11	89912091	A	AAAAT	0.524	33	4	89	3	57	0	No	TRIM49D1	-	-	-	-	-	-	-	-	-	-	-	-
MI-244	31	21	1	chr1	38046636	GGCC	G	0.86	40	3	86	0	81	0	No	POU3F1	-	-	-	-	-	-	-	-	-	-	-
			2	chr2	33222135	C	T	0.686	57	31	58	3	96	0	Yes	LTBP1	c.1860C>T	p.Asn620=	0.73	0.464	N/A	N/A	Tissue enhanced (Cervix)	No phenotype	B	TGGCTTCAGATATCACTTACACT	AGGAGTGAACATGAGGTGGT	No	No
			3	chr2	151733101	G	GT	0.668	43	5	68	0	81	0	No	NEB	-	-	-	-	-	-	-	-	-	-	-	-
			4	chr2	170996763	T	TA	0.585	46	10	57	2	39	0	No	TLK1	-	-	-	-	-	-	-	-	-	-	-	-
			5	chr4	40800113	A	C	0.617	47	15	37	0	42	0	No	NSUN7	-	-	-	-	-	-	-	-	-	-	-	-
			6	chr4	40800114	A	C	0.505	44	15	37	0	42	0	No	NSUN7	-	-	-	-	-	-	-	-	-	-	-	-
			7	chr4	55974802	C	T	0.668	42	21	70	0	40	0	No	CEP135	-	-	-	-	-	-	-	-	-	-	-	-
			8	chr5	94417312	C	T	0.889	51	45	91	0	49	4	Yes	KIAA0825	c.2551G>A	p.Ala851Thr	0.94	0.279	Benign (Moderate) (0.06)	Benign (Moderate) (0.102)	Low tissue specificity	Hydrometra	B	AATGTCTCATACCTGGGATGTT	AAAACCATTTCCACAGCATT	No	No
			9	chr6	46596080	A	T	0.753	36	25	57	0	32	0	No	CYP39A1										-	-
			10	chr7	48489326	G	C	0.989	35	31	60	0	33	0	Yes	ABCA13	c.13273G>C	p.Val4425Leu	1.06	0.0557	Benign (Moderate) (0.17)	Benign (Moderate) (0.117)	Tissue enriched (Bone marrow)	Abnormal male genitalia morphology	B	CGAGCTAATTTCGTGAGAGC	ACGGATTGGTTGCCAAGTAG	No	No
			11	chr8	28447252	C	T	0.986	31	39	33	0	93	0	Yes	FBXO16	c.762G>A	p.Met254Ile	0.97	0.372	Benign (Moderate) (0.1)	Benign (Supporting) (0.169)	Tissue enhanced (Epididymis, Pituitary gland)	No phenotype	B	GTCATGGCTTCTCTGCCAGT	TGGAGATGCAGGAGTTGATG	No	No
			12	chr10	114959784	G	A	0.535	52	23	31	0	64	0	No	TRUB1	-	-	-	-	-	-	-	-	-	-	-	-
			13	chr11	6876591	T	G	0.591	47	23	54	0	58	0	No	-	-	-	-	-	-	-	-	-	-	-	-	-
			14	chr13	112565102	G	A	0.774	64	23	113	0	43	0	No	TUBGCP3	-	-	-	-	-	-	-	-	-	-	-	-
			15	chr14	89932563	G	A	0.877	35	16	30	0	55	0	No	EFCAB11	-	-	-	-	-	-	-	-	-	-	-	-
			16	chr17	4894334	C	T	0.994	101	50	101	0	117	0	Yes	MINK1	c.2808+23C>T	p.?	0.4	4.19e-05	N/A	N/A	Low tissue specificity	Small uterus	VUS	TGCCCTCTGTCCTGTAGACC	GACAGCAGTCAGGCAAACAA	Yes	No
			17	chr17	44355707	G	A	0.998	95	52	125	0	132	0	Yes	FAM171A2	c.1022+8C>T	p.?	0.6	7.147e-07	N/A	N/A	Tissue enhanced (Brain, Pituitary gland)	No phenotype	VUS	CTGTCTTCAACCACCAGCAC	AAGGCAGGAAGGGTGTCTAC	Yes	No
			18	chr17	47682401	C	T	0.697	41	46	39	5	77	0	Yes	KPNB1	c.2631-3C>T	p.?	0.12	0.209	N/A	N/A	Low tissue specificity	No phenotype	B	GGCACATAGGACAAGAAGAAAG	TGTGTTTTCAAGCCTCACTCA	No	No
MI-247	25	20	1	chr1	66827054	TA	T	0.514	33	6	39	1	34	1	No	WDR78	-	-	-	-	-	-	-	-	-	-	-	No de novo varient identified
			2	chr2	111850933	GA	G	0.54	44	5	42	0	38	0	No	APNAC1	-	-	-	-	-	-	-	-	-	-	-
			3	chr3	51470890	G	GA	0.945	38	2	41	2	58	2	No	DCAF1	-	-	-	-	-	-	-	-	-	-	-
			4	chr3	57259807	T	TA	0.822	31	3	36	1	30	1	No	APPL1	-	-	-	-	-	-	-	-	-	-	-
			5	chr4	145124971	A	AT	0.892	38	6	30	0	34	0	No	ABCE1	-	-	-	-	-	-	-	-	-	-	-
			6	chr8	29099293	CA	C	0.962	32	8	48	0	33	0	No	KIF13B	-	-	-	-	-	-	-	-	-	-	-
			7	chr10	125907572	ATG	A	0.507	46	8	41	0	43	0	No	FANK1	-	-	-	-	-	-	-	-	-	-	-
			8	chr19	49712642	T	TA	0.874	40	5	37	0	32	0	No	CPT1C	-	-	-	-	-	-	-	-	-	-	-
MI-251	28	22	1	chr2	203285656	CA	C	0.567	34	5	49	2	42	0	No	CYP20A1										-	-	-
			2	chr4	26415683	AC	A	0.547	31	4	35	0	31	0	No	RBPJ										-	-	-
			3	chr7	1498936	A	C	0.821	61	43	78	0	67	0	Yes	INTS1	c.1137+39T>G	p.?	0.79	0.0845	N/A	N/A	Low tissue specificity	No phenotype	VUS	CAGTTCATGCAGACGGACAT	CCATCGACAACGTCTCCAG	No	No
			4	chr7	45183480	C	T	0.991	31	68	31	0	32	0	Yes	RAMP3	c.*68C>T	p.?	1.71	1.68e-05	N/A	N/A	Low tissue specificity	No phenotype	VUS	GCTGATCGTTATACCCGTCG	ACTGGCCCTAGAATGAGCAA	Yes	No
			5	chr7	155506967	TGA	T	0.718	33	4	41	0	30	0	No	CNPY1	-	-	-	-	-	-	-	-	-	-	-	-
			6	chr9	136979370	G	GC	0.935	33	4	49	0	45	0	No	PTGDS	-	-	-	-	-	-	-	-	-	-	-	-
			7	chr10	102890520	AT	A	0.709	33	7	41	0	42	0	No	BORCS7-ASMT	-	-	-	-	-	-	-	-	-	-	-	-
			8	chr12	113180950	ACTT	A	0.509	51	4	93	0	48	0	No	DDX54	-	-	-	-	-	-	-	-	-	-	-	-
			9	chr17	7329247	A	C	0.747	67	29	88	0	74	0	No	NEURL4	-	-	-	-	-	-	-	-	-	-	-	-
			10	chr18	62138970	AT	A	0.545	42	9	53	0	31	1	No	PIGN	-	-	-	-	-	-	-	-	-	-	-	-
			11	chr19	1004508	G	C	0.621	40	13	68	0	58	0	No	GRIN3B	-	-	-	-	-	-	-	-	-	-	-	-
			12	chr20	2864975	T	C	0.994	56	55	73	0	74	0	Yes	VPS16	c.1927-3T>C	p.?	0.81	6.84e-07	N/A	N/A	Low tissue specificity	No phenotype	VUS	GTGTCAGAGGAGCTAGCCAT	GAGCCGCATTTGATCCTCTG	Yes	No
			13	chrX	70281103	C	T	0.92	63	100	44	0	60	0	Yes	ARR3	c.1071C>T	p.Ala357=	N/A	3.64e-06	N/A	N/A	Tissue enriched (Retina)	No phenotype	VUS	TTCAGGGGAAGTGTGTGTGT	AGCCATATGTTTCCACTGCAC	Yes	No
MI-252	25	22	1	chr1	111421217	T	C	0.98	85	50	56	0	56	0	Yes	OVGP1	c.903+59A>G	p.?	0.78	N/A	N/A	N/A	Tissue enriched (Fallopian tube)	No phenotype	VUS	CACCAAGTCCTTCGTCCCTT	CTAAGAATGGGTTGCAGGCC	Yes	No
			2	chr1	237654214	G	GA	0.71	41	6	39	del- 18	39	del- 20	No	-	-	-	-	-	-	-	-	-	-	-	-
			3	chr3	28496898	T	TA	0.94	80	12	74	1	71	0	No	-	-	-	-	-	-	-	-	-	-	-	-
			4	chr6	88801535	AAC	A	0.942	42	5	94	0	54	1	No	-	-	-	-	-	-	-	-	-	-	-	-
			5	chr7	108234699	G	GA	0.808	42	9	68	3	49	1	No	-	-	-	-	-	-	-	-	-	-	-	-
			6	chr8	123129235	T	TA	0.873	39	5	46	0	32	0	No	-	-	-	-	-	-	-	-	-	-	-	-
			7	chr8	143865475	G	A	0.638	232	14	45	0	40	2	No	-	-	-	-	-	-	-	-	-	-	-	-
			8	chr10	16869557	TG	T	0.901	34	8	32	0	30	1	No	-	-	-	-	-	-	-	-	-	-	-	-
			9	chr10	89223646	TA	T	0.608	34	6	35	0	44	4	No	-	-	-	-	-	-	-	-	-	-	-	-
			10	chr11	85959064	G	GA	0.698	56	7	41	0	33	0	No	-	-	-	-	-	-	-	-	-	-	-	-
* P=Pathogenic, LP= likely pathogenic, VUS= variant of uncertain significance, LB= likely benign, B=benign
