# Supplementary material for: Genetic diversity of infertile males in India
Source: Research Square preprint supplement (doi:10.21203/rs.3.rs-7849365/v1), 2025-10-31
Supplement: Supplementary file 13 [file d23a6c46a15f1708a5a9cd34.xlsx]

## Sheet: Sheet1
Supplementary Table 7: Primer sequences for Sanger sequencing of candidate gene variants
Gene (Transcript)	Variant	Left primer	Right primer
AR (ENST00000374690.9)	c.2317G>A (p.Glu773Lys)	TAGCTCAACCCGTCAGTACC	AAGCTTCACTGTCACCCCAT
FAM83F (ENST00000333407.11)	c.671G>A (p.Arg224Leu)	CTTCTTCCTGCTCGCCAAAG	TGGCATCTTCCTGAACACCT
RBM5 (ENST00000347869.8)	c.853A>G (p.Met285Val)	GTGGTGGGAATGCATGTGTA	AGGAGCCTCAGACAGTTTCA
QRICH2 (ENST00000262765.10)	c.3808G>A (p.Val1270Met)	CCCAGCCTTGCAGATGTTTT	TCGATCTCCATCTCCAGGTG
TEX15 (ENST00000643185.2)	c.6107G>A (p.Arg2036Lys)	AGCTTCGCAATGTTGGTTCA	GCTCAGCTAATCATACGGCC
TEX15 (ENST00000643185.2)	c.7691C>T (p.Thr2564Ile)	GTGATAGAGACTGCTGTTTCCG	TGACTTTCCTAATGTGGGCCA
DNAH9 (ENST00000262442.9)	c.12047A>G (p.Asn4016Ser)	TCAGCACCCTGGAGAAGAAG	CCCGACTCCCTTCTGAGTT
DNAH9 (ENST00000262442.9)	c.12640G>T (p.Gly4214Cys)	TGAGCTTGCCCTTGATTTTC	GCTGTGTACTGCCAAAATGG
CCDC183 (ENST00000338005.7)	c.886C>T (p.Gln296Ter)	GATGCCTGTGTCTTGGGTG	TGTGTCCATTTCAGAGTGCC
DNAH17 (ENST00000389840.7)	c.6389C>T (p.Ala2130Va)	CCTCATCCATGTCTCCCCAG	GGATGTACTGGGTTGGGGTC
DNAH17 (ENST00000389840.7)	c.7144G>C (p.Glu2382Gln)	TTCGTGTTCACCTGCTTCTG	GCACCGATTCCTGCCTCTAA
SOX30 (ENST00000265007.11)	c.2234A>T (p.Glu745Val)	CAGTGGGGAAGAAAACTTAAACC	TTTTCTCATACCAACTGACCCA
