# Supplementary material for: Genetic diversity of infertile males in India
Source: Research Square preprint supplement (doi:10.21203/rs.3.rs-7849365/v1), 2025-10-31
Supplement: Supplementary file 14 [file dfa02d14c86ed571d6c2c15e.xlsx]

## Sheet: Supplementary Table 9
Supplementary Table 9: Candidate genes and variants (SNVs) detected by whole exome sequencing across 48 MI probands in the cohort.
Case ID	Gene	gDNA variant	Transcript ID	Exon/ Intron	cDNA	Protein	Variant Type	Known/ Novel variant	Depth (x)	Zygosity	Minor allele frequency gnomAD (%)	Variant pathogenicity by in-silico prediction tools	Z score/ LOEUF score	Gene expression enriched in testis	Interaction with known infertility gene***	Mouse phenotype likely associated with MI ****	OMIM Disease ID	Mode of Inheritance	ACMG-AMP variant classification	Requires Sanger validation (yes/ no)	Parental transmission	ACMG-AMP variant reclassification	Conclusion	Clinvar submission ID
MI-004	-	-	-	-	-	-	-	-	-	-	-	-	-	-	-	-	-	-	-	-	-	-	No candidate gene identified	-
MI-022	AR	chrX(GRCh38):g.67717621G>A	ENST00000374690.9	5	c.2317G>A	p.Glu773Lys	Missense	Novel	17x	Hemizygous	0	RMFDB	1.23/0.29	Yes	No	Reproductive system	#312300	X-linked recessive	Likely pathogenic (PS4:Strong; PM1, PM2, PM5: Moderate; PP2, PP3: Supporting )	Yes	Maternal	Likely pathogenic	Likely disease causing	SUB13586524
MI-029	FAM83F	chr22(GRCh38):g.40019900G>A	ENST00000333407.11	3	c.671G>A	p.Arg224Leu	Missense	Novel	123x	Homozygous	0.0013% (NEF: 0.0029%)	SMDB	1.07/1.43	Yes	No	Reproductive system	Novel gene association	Autosomal recessive	VUS (PM2: Moderate)	Yes	Maternal & Paternal	VUS	Novel candidate gene	SUB12944586
MI-030	RBM5	chr3(GRCh38):g.50105707A>G	ENST00000347869.8	10	c.853A>G	p.Met285Val	Missense	Novel	32x	Heterozygous	0.002% (SAS:0.06%)	SLMC	4.17/0.14	Yes	No	Reproductive system, endocrine/ exocrine gland, cellular	Novel gene association	Autosomal dominant	VUS (PM2 – moderate PP2 – supporting)	Yes	Maternal	VUS	Novel candidate gene	SUB13586566
MI-032	QRICH2	chr17(GRCh38):g.76280911C>T	ENST00000262765.10	9	c.3808G>A	p.Val1270Met	Missense	Novel	34x	Homozygous	0.0001% (OTH: 0.0017%)	SLM	0.79/0.93	Yes	No	Reproductive system, cellular	#318341	Autosomal recessive	VUS (PM2: Moderate; BS2: Strong)	Yes	Maternal & Paternal	VUS	Likely disease causing	SUB13595522
MI-033	-	-	-	-	-	-	-	-	-	-	-	-	-	-	-	-	-	-	-	-	-	-	No candidate gene identified	-
MI-041	-	-	-	-	-	-	-	-	-	-	-	-	-	-	-	-	-	-	-	-	-	-	No candidate gene identified	-
MI-047	TEX15	chr8(GRCh38):g.30844060C>T	ENST00000643185.2	8	c.6107G>A	p.Arg2036Lys	Missense	Novel	36x	Heterozygous	0.0024% (ASJ:0.0423%)	SFD	-1.15/0.78	Yes	Interact with TEX11, ZMTND15	Reproductive system, endocrine/ exocrine gland, cellular	#617960	Autosomal recessive	VUS (PM2: Moderate ; BP4: Supporting)	Yes	Paternal	-	Unlikely to be causative	-
	TEX15	chr8(GRCh38):g.30842476G>A	ENST00000643185.2	8	c.7691C>T	p.Thr2564Ile	Missense	Novel	36x	Heterozygous	0.0912% (SAS:1.1082%)	SFD	-1.15/0.78						Likely benign (BS2: Strong ; BP4: Supporting)	Yes	Paternal	-	Unlikely to be causative	-
MI-053	PMFBP1	chr16(GRCh38):g.72129128C>A	ENST00000237353.15	13	c.1888G>T	p.Glu630Ter	Nonsense	Novel	44x	Heterozygous	0.0008% .	MDB	-0.47/1.1	Yes	Interacts with SPATC1L, SPATA6,HOOK1, TSGA10, SUN5, BRDT,	Reproductive system, endocrine/ exocrine gland, cellular	#618112	Autosomal recessive	Pathogenic (PM3: Strong; PVS1: Very strong; PM2: Moderate)	Yes	Maternal	Pathogenic	Likely disease causing	SUB13161524
	PMFBP1	chr16(GRCh38):g.72130708G>A	ENST00000237353.15	11	c.1462C>T	p.Gln488Ter	Nonsense	Novel	29x	Heterozygous	0.0003% (SAS:0.0058%)	MDB	-0.47/1.1						Likely pathogenic (PM2: Strong; PVS1: Very strong; PM2: Moderate)	Yes	Paternal	Likely pathogenic	Likely disease causing	SUB13161791
MI-086	-	-	-	-	-	-	-	-	-	-	-	-	-	-	-	-	-	-	-	-	-	-	No candidate gene identified	-
MI-089	HYDIN	chr16(GRCh38):g.70973906C>T	ENST00000393567.7	34	c.5152G>A	p.Val1718Met	Missense	Novel	118x	Heterozygous	0	SFD	0.81/0.51	Yes	Interacts with CCDC40, RSPH4A,	Reproductive system	#608647	Autosomal recessive	VUS (PP2 – supporting; BP4: Supporting)	Yes	Maternal	VUS	Likely disease causing	SUB13049555
	HYDIN	chr16(GRCh38):g.71178936T>A	ENST00000393567.7	4	c.373A>T	p.Asn125Tyr	Missense	Novel	44x	Heterozygous	0.0045% (SAS: 0.0733%)	SMFD	0.81/0.51						VUS (PP2 – supporting; BS2: Strong)	Yes	Paternal	VUS	Likely disease causing	SUB13049556
MI-091	CFAP61	chr20(GRCh38):g.20251719G>A	ENST00000245957.10	20	c.2284G>A	p.Val762Met	Missense	Novel	144x	Heterozygous	0.0012% (MID:0.0174%)	MD	0.24/0.73	Yes	Interacts with THEGL, WDR66, RSPH3, MAATS1, CFAT43, CFAP58, CFAP70	Reproductive system, endocrine/ exocrine gland, cellular	#620409	Autosomal recessive	VUS (PM2: Moderate)	Yes	UNK	-	Unlikely to be causative	-
	CRISP2	chr6(GRCh38):g.49698372T>C	ENST00000339139.5	6	c.407A>G	p.His136Arg	Missense	Novel	70x	Heterozygous	0.0005% (SAS:0.0081%)	SMD	-0.46/1.68	Yes	Interacts with GGNBP2, PATE1, AKAP4, PGK2, CATSPER1,	Reproductive system, endocrine/ exocrine gland, cellular	None	Autosomal recessive	VUS (PM2: Moderate)	Yes	UNK	-	Unlikely to be causative	-
MI-099	DNAH1	chr3(GRCh38):g52386202del	(ENST00000420323.7)	55	c.8668del	p.Thr2890GlnfsTer46	Frameshift	Novel	105x	Heterozygous	0.001% (SAS:0.00162%)	M	1.21/0.48	Yes	Interacts with DNAH17, DNAH7, DNAI2, DNAH2, DNAH3, CCDC114, DNAH12, DNAH8,	Reproductive system, cellular	#617576	Autosomal recessive	Pathogenic (PM3:Supporting; PVS1: Very Strong; PM2: Moderate)	Yes	Likely Paternal	Pathogenic	Likely disease causing	SUB12944699
	DNAH1	chr3:g.52362461C>G	(ENST00000420323.7)	31	c.5054C>G	p.Pro1685Arg	Missense	Novel	119x	Heterozygous	0	PSL	1.21/0.48						VUS (PM3:Supporting; PM2: Moderate)	Yes	Maternal	Likely pathogenic	Likely disease causing	SUB12953621
MI-100	SOX3	chrX(GRCh38):g.140504997G>C	ENST00000370536.4;	1	c.64C>G	p.Arg22Gly	Missense	Novel	104x	Hemizygous	0.0017% (SAS:0.0299%)	SFD	2.21/0.85	Yes	Interacts with EXS1, DMRT1,	Reproductive system	Novel gene association	X-linked recessive	VUS (PM2: Moderate)	Yes	Maternal	VUS	Likely disease causing	SUB12944682
MI-105	-	-	-	-	-	-	-	-	-	-	-	-	-	-	-	-	-	-	-	-	-	-	No candidate gene identified	-
MI-109	ODF1	chr8(GRCh38):g.102560726G>A	ENST00000285402.4	2	c.595G>A	p.Glu199Lys	Missense	Novel	155x	Heterozygous	0.0002% (MID:0.0019%)	SMDB	0.68/0.27	Yes	Interacts with ODF2, SPATC1, SUN5, SPAG4, ODF4, AKAP3	Reproductive system, endocrine/ exocrine gland, cellular	Novel gene association	Autosomal recessive	VUS (PM2: Moderate; PP2: Supporting)	Yes	Maternal	VUS	Likely disease causing; Second variant not identified
	CHD5	chr1(GRCh38):g.6112993C>T	ENST00000262450.8	34	c.4918G>A	p.Val1640Met	Missense	Novel	88x	Heterozygous	0.0031% (SAS:0.0475%)	FD	5.32/0.16	Yes	No	Reproductive system	None	Autosomal dominant	VUS (PM2: Moderate; PP2: Supporting)	Yes	Likely Paternal	Benign	Unlikely to be causative	-
MI-110	-	-	-	-	-	-	-	-	-	-	-	-	-	-	-	-	-	-	-		-	-	No candidate gene identified	-
MI-123	DNAH9	chr17(GRCh38):g.11930035A>G	ENST00000262442.9	63	c.12047A>G	p.Asn4016Ser	Missense	Novel	168x	Heterozygous	0.0047% (SAS:0.0614%)	SPMC	0.04/ 0.72	Yes	Interact with DNALI1, DNAH12, NME8, CCDC114	Reproductive system	#618300	Autosomal recessive	VUS (PM2: Moderate)	Yes	Maternal	VUS	Likely disease causing	SUB13049524
	DNAH9	Chr17(GRCh38):g.11937502G>T	ENST00000262442.9	66	c.12640G>T	p.Gly4214Cys	Missense	Novel	130x	Heterozygous	0.29% (MID:1.1376%)	SPMC	0.04/ 0.72						VUS (PM2: Supporting; BP1: Supporting)	Yes	Paternal	VUS	Likely disease causing	SUB13049542
MI-127	-	-	-	-	-	-	-	-	-	-	-	-	-	-	-	-	-	-	-	-	-	-	No candidate gene identified	-
MI-129	TEX15	chr8(GRCh38):g.30842476G>A	ENST00000643185.2	6	c.7691C>T	p.Thr2564Ile	Missense	Novel	18x	Heterozygous	0.0912% (SAS:1.1082%)	PSC	-1.15/0.78	Yes	Interact with TEX11, ZMTND15	Reproductive system, endocrine/ exocrine gland, cellular	#617960	Autosomal recessive	Likely benign (BS2: Strong; BP4:Supporting)	Yes	Likely maternal	-	Likely in Cis; unlikely to be causative.	-
	TEX15	chr8(GRCh38):g.30837097C>T	ENST00000643185.2	10	c.9187G>A	p.Gly3063Arg	Missense	Novel	159x	Heterozygous	0.0915% (SAS:1.1083%)	MD	-1.15/0.78	Yes		Reproductive system, endocrine/ exocrine gland, cellular	#617960	Autosomal recessive	VUS (BS2: Strong)	Yes	Likely maternal	-	Likely in Cis; unlikely to be causative.	-
MI-132	-	-	-	-	-	-	-	-	-	-	-	-	-	-	-	-	-	-	-	-	-	-	No candidate gene identified	-
MI-134	-	-	-	-	-	-	-	-	-	-	-	-	-	-	-	-	-	-	-	-	-	-	No candidate gene identified	-
MI-136	IFT140	chr16(GRCh38):g.1587949C>T	ENST00000426508.7	8	c.886G>A	p.Gly296Arg	Missense	Novel	54x	Heterozygous	0.0046% (SAS:0.0489%)	MDB	-0.987805	Yes	Interacts with IFT52, IFT122, IFT27, TULP3, IFT43, WDR35, IFT80, IFT88, TTC21B, WDR19	Reproductive system	Novel gene association	Autosomal recessive	VUS (PM2, PM5: Moderate)	Yes	Maternal	VUS	Probably candidate gene; Second variant not identified
MI-138	CCDC183	chr9(GRCh38):g.136805395C>T	ENST00000338005.7;	9	c.886C>T	p.Gln296Ter	Nonsense	Novel	95x	Heterozygous	0	MDB	-0.142857	Yes	Interact with LCN12	Reproductive system	Novel gene association	Autosomal dominant	Likely pathogenic (PVS1:Very strong; PM2:Moderate )	Yes	De novo	Likely pathogenic	Likely disease causing	SUB14182465
MI-139	CTCFL	chr20(GRCh38):g.57515735C>T	ENST00000243914.8	6	c.1159C>T	p.Arg387Cys	Missense	Novel	224x	Homozygous	0.001% (AFR:0.006%)	SMD	0.73/ 0.58	Yes	No	Reproductive system, endocrine/ exocrine gland, cellular	Novel gene association	Autosomal recessive	VUS (PM2: Moderate)	Yes	Maternal & Paternal	VUS	Likely disease causing	SUB13161356
MI-145	IFT88	chr13(GRCh38):g.20601929C>T	ENST00000351808.10	12	c.1037C>T	p.Pro346Leu	Missense	Novel	15x	Heterozygous	0.0018% (SAS:0.0183%)	MDC	0.34/0.71	Yes	Interacts wirh IFT27, IFT52, IFT81, IFT80, IFT57, IFT88, IFT172, CLUAP1, IFT46, IFT74, TTC30B	Reproductive system, endocrine/ exocrine gland, cellular	Novel gene association	Autosomal recessive	VUS (PM2: Moderate; BP4: Supporting)	Yes	Paternal	VUS	Probably candidate gene; Second variant not identified	SUB13603330
MI-151	-	-	-	-	-	-	-	-	-	-	-	-	-	-	-	-	-	-	-	-	-	-	No candidate gene identified	-
MI-155	-	-	-	-	-	-	-	-	-	-	-	-	-	-	-	-	-	-	-	-	-	-	No candidate gene identified	-
MI-156	-	-	-	-	-	-	-	-	-	-	-	-	-	-	-	-	-	-	-	-	-	-	No candidate gene identified	-
MI-157	-	-	-	-	-	-	-	-	-	-	-	-	-	-	-	-	-	-	-	-	-	-	No candidate gene identified	-
MI-158	-	-	-	-	-	-	-	-	-	-	-	-	-	-	-	-	-	-	-	-	-	-	No candidate gene identified	-
MI-159	-	-	-	-	-	-	-	-	-	-	-	-	-	-	-	-	-	-	-	-	-	-	No candidate gene identified	-
MI-162	-	-	-	-	-	-	-	-	-	-	-	-	-	-	-	-	-	-	-	-	-	-	No candidate gene identified	-
MI-164	DNAH17	chr17(GRCh38):g.78494055G>A	ENST00000389840.7	41	c.6389C>T	p.Ala2130Va	Missense	Novel	89x	Heterozygous	0.0085% (SAS:0.1033%)	MDE	-4.17333	Yes	Interact with DNAH1, DNAH2,DNAH3, DNAH8	Reproductive system, cellular	#618643	Autosomal recessive	VUS (BS1: Strong)	Yes	Maternal	VUS	Likely disease causing	SUB13161441
	DNAH17	chr17(GRCh38):g.78486091C>G	ENST00000389840.7	46	c.7144G>C	p.Glu2382Gln	Missense	Novel	110x	Heterozygous	0.0109% (SAS:0.1716%)	MD	-4.17333						Likely benign (BS1:Strong; BS2:Supporting)	Yes	Paternal	VUS	Likely disease causing	SUB13161495
MI-172	PDHA2	chr4(GRCh38):g.95840395CAG>AG	ENST00000295266.6	1	c.246_247del	p.Lys83IlefsTer20	Missense	Novel	183x	Heterozygous	0.0183% (EAS:0.1612%)	M	-0.26/1.77	Yes	No	Reproductive system, endocrine/ exocrine gland, cellular	#619828	Autosomal recessive	VUS (PM2: Moderate; BS2: Strong)	Yes	Likely Maternal	-	Unlikely to be causative	-
	DNAH10	chr12(GRCh38):g.123879698G>A	ENST00000673944.1	50	c.8531G>A	p.Arg2844Lys	Missense	Novel	158x	Heterozygous	0	MD	1.55/0.69	Yes	Interact with DNAI1, CCDC65, DNAI2, DNAH12	Reproductive system, endocrine/ exocrine gland, cellular	#619515	Autosomal recessive	VUS (PM2: Moderate; PP2: Supporting)	Yes	Likely paternal	-	Unlikely to be causative	-
MI-180	ZPBP	chr7(GRCh38):g.50031241T>C	ENST00000046087.7	5	c.557A>G	p.Tyr186Cys	Missense	Novel	67x	Heterozygous	0% (SAS:0.0012%)	SMD	0.89/0.8	Yes	Interact with DPY19L2, SPATA16, SPACA1, SPESP1, ABHD2, SPA17	Reproductive system, endocrine/ exocrine gland, cellular	#619799	Autosomal recessive	VUS (PM2: Moderate)	Yes	Maternal	VUS	Likely disease causing	SUB13694921
MI-190	-	-	-	-	-	-	-	-	-	-	-	-	-	-	-	-	-	-	-	-	-	-	No candidate gene identified	-
MI-194	-	-	-	-	-	-	-	-	-	-	-	-	-	-	-	-	-	-	-	-	-	-	No candidate gene identified	-
MI-196	-	-	-	-	-	-	-	-	-	-	-	-	-	-	-	-	-	-	-	-	-	-	No candidate gene identified	-
MI-207	-	-	-	-	-	-	-	-	-	-	-	-	-	-	-	-	-	-	-	-	-	-	No candidate gene identified	-
MI-213	SOX30	chr5(GRCh38):g.157626368T>A	ENST00000265007.11	5	c.2234A>T	p.Glu745Val	Missense	Novel	108x	Heterozygous	0	SMFD	0.78/0.23	Yes	Interact with TSGA10, SUN5, DMRT1, SYPC3	Reproductive system, endocrine/ exocrine gland, cellular	Novel gene association	Autosomal recessive	VUS (PM2: Moderate)	Yes	Paternal	VUS	Probably candidate gene; Second variant not identified	SUB13694925
MI-242	-	-	-	-	-	-	-	-	-	-	-	-	-	-	-	-	-	-	-	-	-	-	No candidate gene identified	-
MI-244	PMFBP1	chr16(GRCh38):g.72139366G>A	ENST00000237353.15	7	c.841C>T	p.Gln281Ter	Nonsense	Novel	136x	Homozygous	0.0105% (SAS:0.0139%)	M	-0.47/1.1	Yes	Interacts with SPATC1L, SPATA6,HOOK1, TSGA10, SUN5, BRDT,	Reproductive system, endocrine/ exocrine gland, cellular	#618112	Autosomal recessive	Pathogenic (PM3: Strong; PVS1:Very strong; PM2: Moderate)	Yes	Maternal & Paternal	Pathogenic	Likely disease causing	SUB13828994
MI-246	ADCY10	chr1(GRCh38):g.167878451C>G	ENST00000367851.9	12	c.1401G>C	p.Glu467Asp	Missense	Novel	72x	Heterozygous	0.0051% (SAS:0.08%)	PMS	2.3/0.92	Yes	No	Reproductive system	Novel gene association	Autosomal recessive	VUS (PM2: Moderate; BS2: Supporting)	Yes	Maternal	VUS	Probably candidate gene; Second variant not identified	SUB14207862
MI-247	-	-	-	-	-	-	-	-	-	-	-	-	-	-	-	-	-	-	-	-	-	-	No candidate gene identified	-
MI-249	-	-	-	-	-	-	-	-	-	-	-	-	-	-	-	-	-	-	-	-	-	-	No candidate gene identified	-
MI-251	-	-	-	-	-	-	-	-	-	-	-	-	-	-	-	-	-	-	-	-	-	-	No candidate gene identified	-
MI-252	-	-	-	-	-	-	-	-	-	-	-	-	-	-	-	-	-	-	-	-	-	-	No candidate gene identified	-
S': damaging/ disease causing by SIFT; 'L': damaging/ disease causing by LRT; 'M': damaging/ disease causing by Mutation taster ; 'F': damaging/ disease causing by FATHMM; 'C' : damaging/ disease causing by CADD; 'B': damaging/ disease causing by BayesDel; 'P': damaging/ disease causing by PolyPhen-2; 'E': damaging/ disease causing by EVE; "R": damaging/ disease causing by REVEL; D: damaging/ dis…

## Sheet: Sheet1
Case ID	Gene	Transcript	gDNA variant	cDNA	Protein	Zygosity	GnomAD variant frequency (population with highest frequency)	Gene expression enriched in testis***	Interaction with known infertility gene****	Variant pathogenicity by in-silico prediction tools	OMIM Disease ID	Mode of Inheritance	Variant classification (ACMG)	Requires Sanger validation (yes/ no)	Parental transmission	ACMG-AMP variant reclassification	Conclusion
MI-004	-	-	-		-	-	-	-	-	-	-	-	-	-	-	-	-
MI-022	AR	ENST00000374690.9	chrX(GRCh38):g.67717621G>A	c.2317G>A	p.Glu773Lys	Hemi	0	Yes		RMFDB	#312300	X-linked recessive	Likely pathogenic (PS4:Strong; PM1, PM2, PM5: Moderate; PP2, PP3: Supporting )	Yes	Maternal	Likely pathogenic	Likely disease causing
MI-029	FAM83F	ENST00000333407.11	chr22(GRCh38):g.40019900G>A	c.671G>A	p.Arg224Leu	Homo	0.0013% (NEF: 0.0029%)	Yes		SMDB	Novel gene association	Autosomal recessive	VUS (PM2: Moderate)	Yes	Maternal & Paternal	VUS	Novel candidate gene
MI-030	RBM5	ENST00000347869.8	chr3(GRCh38):g.50105707A>G	c.853A>G	p.Met285Val	Het	0.002% (SAS:0.06%)	Yes		SLMC	Novel gene association	Autosomal dominant	VUS (PM2 – moderate PP2 – supporting)	Yes	Maternal	VUS	Novel candidate gene
MI-032	QRICH2	ENST00000262765.10	chr17(GRCh38):g.76280911C>T	c.3808G>A	p.Val1270Met	Homo	0.0001% (OTH: 0.0017%)	Yes		SLM	#318341	Autosomal recessive	VUS (PM2: Moderate; BS2: Strong)	Yes	Maternal & Paternal	VUS	Likely disease causing
MI-033	-	-	-	-	-	-	-	-	-		-	-	-	-	-	-	-
MI-047	TEX15	ENST00000643185.2	chr8(GRCh38):g.30844060C>T	c.6107G>A	p.Arg2036Lys	Het	0.0024% (ASJ:0.0423%)	Yes		SFD	#617960	Autosomal recessive	VUS (PM2: Moderate ; BP4: Supporting)	Yes
	TEX15	ENST00000643185.2	chr8(GRCh38):g.30842476G>A	c.7691C>T	p.Thr2564Ile	Het	0.0912% (SAS:1.1082%)			SFD
MI-105	-	-	-	-	-	-	-	-	-	-	-	-	-	-	-	-	-
MI-123	DNAH9	ENST00000262442.9	chr17(GRCh38):g.11930035A>G	c.12047A>G	p.Asn4016Ser	Het	0.0047% (SAS: 0.0614%)	Yes		SMFD	#618300	Autosomal recessive	VUS (PM2: Moderate)	Yes	Maternal	VUS	Likely disease causing
	DNAH9	ENST00000262442.9	Chr17(GRCh38):g.11937502G>T	c.12640G>T	p.Gly4214Cys	Het				SMFD			VUS (PM2: Supporting; BP1: Supporting)	Yes	Paternal	VUS	Likely disease causing
MI-132	-	-	-	-	-	-	-	-	-		-	-	-	-	-	-	-
MI-138	CCDC183	ENST00000338005.7;	chr9(GRCh38):g.136805395C>T	c.886C>T	p.Gln296Ter	Het	0	Yes		MDB	Novel gene association	Autosomal dominant	Likely pathogenic (PVS1:Very strong; PM2:Moderate )	Yes	De novo	Likely pathogenic	Likely disease causing
MI-151	-	-	-	-	-	-	-	-	-		-	-	-	-	-	-	-
MI-156	-	-	-	-	-	-	-	-	-		-	-	-	-	-	-	-
MI-157	-	-	-	-	-	-	-	-	-		-	-	-	-	-	-	-
MI-159	-	-	-	-	-	-	-	-	-		-	-	-	-	-	-	-
MI-164	DNAH17	ENST00000389840.7	chr17(GRCh38):g.78494055G>A	c.6389C>T	p.Ala2130Va	Het	0.0085% (SAS:1.1033%)	Yes		MFDE	#618643	Autosomal recessive	VUS (BS1: Strong)	Yes	Maternal	VUS	Likely disease causing
	DNAH17	ENST00000389840.7	chr17(GRCh38):g.78486091C>G	c.7144G>C	p.Glu2382Gln	Het	0.0109% (SAS: 0.1716%			MFD			Likely benign (BS1:Strong; BS2:Supporting)	Yes	Paternal	VUS	Likely disease causing
MI-194	-	-	-	-	-	-	-	-	-		-	-	-	-	-	-	-
MI-207	-	-	-	-	-	-	-	-	-		-	-	-	-	-	-	-
MI-213	SOX30	ENST00000265007.11	chr5(GRCh38):g.157626368T>A	c.2234A>T	p.Glu745Val	Het	0	Yes		SMFD	Novel gene association	Autosomal recessive	VUS (PM2: Moderate)	Yes	Paternal	VUS	Probably candidate gene; Second variant not identified
MI-247	-	-	-	-	-	-	-	-	-		-	-	-	-	-	-	-
MI-251	-	-	-	-	-	-	-	-	-		-	-	-	-	-	-	-
MI-252	-	-	-	-	-	-	-	-	-		-	-	-	-	-	-	-
S': damaging/ disease causing by SIFT; 'L': damaging/ disease causing by LRT; 'M': damaging/ disease causing by Mutation taster ; 'F': damaging/ disease causing by FATHMM; 'C' : damaging/ disease causing by CADD; 'B': damaging/ disease causing by BayesDel; 'P': damaging/ disease causing by PolyPhen-2; 'E': damaging/ disease causing by EVE; "R": damaging/ disease causing by REVEL
Het: Heterozygous; Homo: Homozygous ; Hemi: Hemizygous

## Sheet: Sheet2
		causative	candidate	candidate (2nd variant not found)	novel	Function	Pathogenicity		AR	Reproductive Organ development
	AR	TRUE	FALSE	FALSE	FALSE	Reproductive Organ development			FAM83F	Spermatogenesis
AR	FAM83F	FALSE	TRUE	FALSE	TRUE	Spermatogenesis			RBM5	Spermatogenesis
AD	RBM5	FALSE	TRUE	FALSE	TRUE	Spermatogenesis			QRICH2	Sperm flagella morphology
AR	QRICH2	FALSE	TRUE	FALSE	FALSE	Sperm flagella morphology			PMFBP1	Spermatogenesis
	PMFBP1	TRUE	FALSE	FALSE	FALSE	Spermatogenesis			HYDIN	Sperm flagella morphology
AR	HYDIN	FALSE	TRUE	FALSE	FALSE	Sperm flagella morphology			DNAH1	Sperm flagella morphology
	DNAH1	TRUE	FALSE	FALSE	FALSE	Sperm flagella morphology			SOX3	Reproductive Organ development
X L	SOX3	FALSE	TRUE	FALSE	FALSE	Reproductive Organ development			ODF1	Sperm flagella morphology
	ODF1	FALSE	FALSE	TRUE	TRUE	Sperm flagella morphology			DNAH9	Sperm flagella morphology
AR	DNAH9	FALSE	TRUE	FALSE	FALSE	Sperm flagella morphology			IFT140	Sperm flagella morphology
	IFT140	FALSE	FALSE	TRUE	TRUE	Sperm flagella morphology			CCDC183	Sperm flagella morphology
	CCDC183	TRUE	TRUE	FALSE	TRUE	Sperm flagella morphology			CTCFL	Spermatogenesis
AR	CTCFL	FALSE	TRUE	FALSE	TRUE	Spermatogenesis			IFT88
	IFT88	FALSE	FALSE	TRUE	TRUE	Sperm flagella morphology			DNAH17	Sperm flagella morphology
AR	DNAH17	FALSE	TRUE	FALSE	FALSE	Sperm flagella morphology			ZPBP
	ZPBP	FALSE	FALSE	TRUE	FALSE	Spermatogenesis + Sperm flagella morphology			SOX30	Spermatogenesis
	SOX30	FALSE	FALSE	TRUE	TRUE	Spermatogenesis			PMFBP1	Spermatogenesis
	PMFBP1	TRUE	FALSE	FALSE	FALSE	Spermatogenesis			ADCY10	Sperm flagella morphology
	ADCY10	FALSE	FALSE	TRUE	TRUE	Spermatogenesis
